# Supplementary material for: In heart failure reactivation of RNA-binding proteins is associated with the expression of 1,523 fetal-specific isoforms
Source: PLoS Comput Biol. 2022 Feb 28;18(2):e1009918. doi: 10.1371/journal.pcbi.1009918 (PMC8912908; doi:10.1371/journal.pcbi.1009918)
Supplement: S2 Table — Shown are the 966 bulk RNA-seq samples used in this study, including: source (iPSCORE or GTEx); subject ID; assay ID; SRA run ID for the GTEx RNA-seq samples downloaded from dbGaP; iPSCORE iPSC line identifier submitted to dbGaP (phs001325), iPSCORE unique differentiation identifier (UDID) assigned to all molecular data generated from same iPSC-CVPC differentiation; total number of reads; % uniquely mapped reads; % of mitochondrial reads, calculated as the number of reads mapping to mitochondrial genes divided by the total number of reads mapping to genes; tissue and organ associated with each sample (arteria, heart, iPSC-CVPC, aorta, coronary artery, atrial appendage or left ventricle: 0 = absent; 1 = present); 50 principal components calculated on the expression of 2,000 genes across the 966 CVS samples using Seurat; UMAP coordinates of each sample after clustering by Seurat; S phase and G2M and scores calculated using Seurat; pseudotime score of each sample using Monocle; cluster membership of each sample calculated using Seurat at four different resolutions (Figs 1A and 1B, S2 and S3); estimated cell type proportions deconvoluted using CIBERSORT; the last column (“Trimmed”) indicates which iPSCORE samples had their read length trimmed to 75 bp to test whether different read lengths between iPSCORE and GTEx affect differential gene and isoform expression analyses. (CSV) [file pcbi.1009918.s018.csv]

Source	Subject ID	Assay ID	SRA Run ID	iPSCORE UDID	Total number of reads	Uniquely mapped reads to chr1-22, X or Y (%)	Mitochondrial reads (%)	Arteria	Heart	iPSC-CVPC	Aorta	Coronary artery	Atrial appendage	Left ventricle	PC1	PC2	PC3	PC4	PC5	PC6	PC7	PC8	PC9	PC10	PC11	PC12	PC13	PC14	PC15	PC16	PC17	PC18	PC19	PC20	PC21	PC22	PC23	PC24	PC25	PC26	PC27	PC28	PC29	PC30	PC31	PC32	PC33	PC34	PC35
iPSCORE	bd04a8cc-5d63-45bc-a2cc-91b0c7cb6e01	013eb23c-4ff0-493b-b106-9c8c9c2176d6	013eb23c-4ff0-493b-b106-9c8c9c2176d6	UDID034	43815018	75.57096975	6.118491153	0	0	1	0	0	0	0	39.5988684285122	-2.0328638452714	-19.8089278000819	-14.301939307465	-2.68111652820972	5.68791578113143	-0.541229946712161	1.22967499998968	-0.2053091570899	0.081116124080344	5.03034442991501	7.33629266779282	-6.03710268510297	-6.70591069334334	-2.79213150381468	-1.59521460838417	-0.442881671047266	-0.626945997183389	-0.0973504266753077	-1.35182749421757	0.396624855632815	-0.901980130211467	1.39834994353572	-2.02387052401555	-1.29985368847612	0.381975756469784	1.71509791960555	-3.74181904138098	4.28563881722571	-0.461212658567023	0.505750718925466	1.71158698350095	0.373852295597523	-0.558130730812204	-0.0580899747150544
iPSCORE	bd4643a6-9742-4a25-8029-a967cc2a84c7	028df3e3-a041-4f91-9da7-517a7a33e271	028df3e3-a041-4f91-9da7-517a7a33e271	UDID149	49659666	78.84608406	2.416717825	0	0	1	0	0	0	0	53.5450309664304	-30.2516825029264	13.3734120282503	7.51056963118797	40.9509317625383	-19.4804016044947	4.63223484519114	-1.47325754311488	-0.287908427972079	1.48667097401205	4.42505815680029	6.11715536203756	2.68933839466248	7.66312435367872	1.23893753159408	4.25796332136794	-9.37133654999064	-3.55493274294926	13.1752460152882	18.7771882062253	2.46303417787253	-5.21891236694537	6.39814244305454	0.345592851078288	3.42426562061904	-0.971072719338993	2.28826653347602	-4.10934389408501	4.91826771999639	-0.813467458317645	0.542215222168935	1.59996777522582	0.212349628098213	1.07264564213544	6.85405921566895
iPSCORE	e0793a72-9694-4711-a2c6-d2ff9071d05f	030ec865-77e5-4e82-9b18-77a51e787655	030ec865-77e5-4e82-9b18-77a51e787655	UDID031	47896530	72.66629127	9.089460134	0	0	1	0	0	0	0	37.5946792743399	-1.38650416129882	-15.8763240099969	-11.2275948745553	-5.98140831627014	4.87791211052051	-1.32639549373837	0.621851040274506	0.308370403998836	1.0014402556296	5.21303777140156	8.95588431590181	-4.54423649399999	-7.18552471939966	-1.88778520407107	-1.5571749631219	-2.0188353094779	-0.684334817759728	-0.202016049469719	-3.14365494264994	0.205657461217373	-0.282518113508069	2.74449495879887	-1.93109400700667	0.154853693011909	-0.892911588207769	1.51329230309248	-3.10156354044444	2.71300393553907	-0.235821508663699	0.470230677539384	2.23453007256309	-0.718402813306069	0.543824885436203	0.651411428155622
iPSCORE	508fb6c5-c9d5-4881-9638-cd4bd04d822f	03df2c1b-bcc6-4fa3-9f47-d6f9e43be283	03df2c1b-bcc6-4fa3-9f47-d6f9e43be283	UDID017	46553472	75.99848192	7.211247316	0	0	1	0	0	0	0	41.634981215487	-6.15290941931065	-10.8413383182931	-6.85230559797251	-5.68104867756611	3.05756784719832	-1.1437269008073	0.307910313997991	-0.0715592083093767	-0.669571424184895	-4.31241599586532	-7.77767875598827	1.586154314263	-0.0438306884330988	-0.454990121940621	-2.60211247946419	-4.80970766754321	1.42811790641367	-0.895606249780772	-1.94742023521708	0.544901148934248	-0.29709614740303	-0.208578256826373	-0.832318936422269	-0.594898583468452	-0.351362496901201	-0.306398484478765	1.1312361884157	-1.07740589200929	-1.62524083007226	0.154806086971936	0.969974038637344	0.0811834405407505	0.934236718145142	-0.429643960526711
iPSCORE	03346cae-a4f3-4481-92ff-d76db0c82468	067afe59-e81d-4176-800d-f1b111c1ec82	067afe59-e81d-4176-800d-f1b111c1ec82	UDID113	57344254	80.1249555	13.8232978	0	0	1	0	0	0	0	39.9374256987658	-0.942277883757062	-18.6763992251693	-12.9011135895191	-2.74447454915641	1.45349564414638	-1.20021026765871	0.40619457162271	-0.546261427542384	0.306148579854654	0.740029273123774	3.64502859277975	-2.90317264338216	-6.12499069650957	-3.59866530924978	-3.25876916690198	-9.8221655192786	0.203415558044433	2.68246925573171	-3.79713750584283	0.393502945396861	-1.71343766063926	6.71549644868757	6.33915365411438	11.3097687758943	-3.90248890621795	-2.97322113971835	7.24512221587275	-1.08157495516825	7.03418335950118	-8.73392017359812	-7.71364542200688	-4.27467031503022	3.43081225279859	2.17772444107204
iPSCORE	bfee9a02-5ec3-4e11-a8e2-ebd47623caa0	0716c9fa-8153-477d-8e24-6abee17c9456	0716c9fa-8153-477d-8e24-6abee17c9456	UDID160	47766956	71.22806821	8.680548955	0	0	1	0	0	0	0	33.7204532572885	1.51639375170224	-16.371392828768	-10.073212820555	-3.91478403073285	1.71226479216191	-0.645094942704402	0.252468346401071	-0.290331333584333	0.412560403219691	-2.05949541111513	-1.88179485657879	3.35240019766666	-0.404064552520096	-0.807503909458304	-2.04127789192454	-5.99224275691543	1.72299637527551	-2.19134281429675	-6.04171716925497	0.50212344508309	0.370809663261859	-0.309031787868818	-1.034908538796	-3.09069399755875	-1.68461809018473	0.70457935399319	1.16498226999313	-2.93829546217133	-2.61327304969626	0.871915582546307	1.20720864600521	1.26967283921372	-1.29389352415196	1.09196918280048
iPSCORE	f0173728-58cb-4d7d-b28d-02355b49b9ed	0726b84c-c9ed-45a8-b50b-e1e8f484be8e	0726b84c-c9ed-45a8-b50b-e1e8f484be8e	UDID074	54937680	83.48197084	4.944748304	0	0	1	0	0	0	0	43.7556484828833	-15.5796600954284	3.96864606473521	1.76622436773674	23.2135924984669	-11.628250217334	2.55961648328155	-2.56995654625069	0.187346562527137	0.369928456102667	0.474826792457852	2.0547254836849	2.69065013829761	2.56010414641776	1.64075141431134	3.17930196238897	5.36491066097233	-0.0425821614763301	-1.02865335157133	-1.9562224487151	-0.482576116322369	1.36193609090641	-0.653709153285779	-0.401366975674418	-3.11937919634594	-0.93277689005968	0.0536419045981154	-0.855254757628199	-1.46393615794798	0.512963737236604	0.106674001157738	0.684029235296958	0.555151238730658	-0.433677606016484	0.30337396836831
iPSCORE	83a1b295-b907-4233-b0a8-df753b2cee16	08f6fa0b-14ea-4ac6-85ec-67045c15d5ac	08f6fa0b-14ea-4ac6-85ec-67045c15d5ac	UDID164	45781006	79.9100745	3.883881451	0	0	1	0	0	0	0	50.8657546529144	-30.5186702678227	41.3999180893592	26.5659731510227	-31.2749367031189	9.04402109676458	-2.31233766802077	2.10400936161312	0.112705075668018	0.773251560324879	3.14313860260657	4.36417993067012	0.564008284656001	5.17820809979329	-0.100258721679117	2.15624444633409	-2.93877751520808	-0.692131336536002	2.46872943598547	9.8506939960854	0.582974715916925	1.07468507096003	-4.65909169967978	2.20426048234039	-3.06047845838656	0.705937722473949	-0.959492322858918	2.23861544213094	-0.557228228497969	2.57188742146262	-1.22224444773949	-2.27752443595924	-1.43530579395998	-0.27513484383465	1.53356634078627
iPSCORE	42e4583a-b1bc-4cc3-85d7-68662433b345	0b111711-0130-44aa-b513-a308d13d1652	0b111711-0130-44aa-b513-a308d13d1652	UDID122	56967234	80.34299506	11.08858471	0	0	1	0	0	0	0	30.4708487160795	2.88023163357481	-15.6285329500395	-9.04223060673349	-4.71627856329466	2.12376161036784	-1.42219265773677	-0.451067901587052	0.490730326139456	0.765886330735616	-2.16078307743523	-1.02888113034225	6.31640214300948	3.14577922167775	1.03546095674151	0.538538662341022	1.86534174634997	1.16197083540917	-3.58538292716706	-6.76820731824055	-0.734974480390589	0.529046757152047	0.894941959064568	0.508952795839744	-1.29440537404056	-1.28852955225052	0.86111530207046	0.38700001463374	-1.22816241486541	-0.72467259112152	-1.47011273689373	0.742684479927899	0.524657366409343	0.727850729200837	1.33066230806899
iPSCORE	d4073658-c7fe-4f53-9e80-b95121a65475	0c025698-b29b-4f3f-adab-c41cffc53911	0c025698-b29b-4f3f-adab-c41cffc53911	UDID272	37579594	75.24882786	5.162056833	0	0	1	0	0	0	0	38.5584713988828	-5.63488392106032	-6.21207001725038	-3.12475375708129	-7.69397770939388	3.45506089726828	-0.64458340560189	0.0179701119950919	0.20799736118258	-0.881572134552005	-4.45260300741005	-8.33729917229203	2.63817205944471	1.78488155125619	0.693841900806111	-1.45444794559355	-1.41638544617246	0.682381175825212	-1.21121947027641	1.466252962294	0.540036799818313	0.0231891145851483	-2.92856101163652	-3.183812882383	-4.65363865405447	1.14456329571574	0.260304375258267	-0.982600098905925	-1.77037527319736	-2.48425016536284	3.82591339130721	2.44350589027368	0.758443462109354	-2.44505830683095	0.687514378686534
iPSCORE	21f44f41-69ee-427c-933b-a0afdc16a0bf	0d9f7f72-66ea-411a-906b-868c1c5bffbe	0d9f7f72-66ea-411a-906b-868c1c5bffbe	UDID159	50580558	79.37619431	2.029309364	0	0	1	0	0	0	0	54.4149449410028	-34.8876407424463	47.352794618869	30.373026084672	-11.1986049349528	-4.04708495031873	-1.20686999052551	1.8076573661472	-0.824621869810943	-0.062862888292363	-0.373816103757528	1.72482188903881	-4.95005591995182	-14.6758334758821	-1.69261284226151	-1.73907183366557	6.7925082877505	-0.637662906629993	-0.224849821178986	-3.64789464936142	-0.0366096586703081	1.13931820191058	0.11802592946676	0.173396406041532	-0.273720650500423	-2.27027238033486	-0.7194003436112	1.88312157535772	-1.4802157231284	-4.17190908162274	2.26301423927709	1.06867371832873	3.34892351394449	-2.59235524343276	0.0400680026459078
iPSCORE	5b8ca416-c75e-4341-b160-3b9be09f6ef5	0e4a2a0e-ef6b-41ce-bc63-d71f6c9fe2c1	0e4a2a0e-ef6b-41ce-bc63-d71f6c9fe2c1	UDID119	41077796	78.32896877	4.654874862	0	0	1	0	0	0	0	46.347219280633	-16.2618753574206	6.54043749193304	5.34850303164053	-3.18366318733243	-0.627672491750337	0.0509408030729774	0.508836245349159	-1.37072417995789	-2.11976884348247	-9.82538305616614	-13.8442601902959	-0.624456633093298	-1.95932628862163	-0.0608093145350073	-1.64535148857558	-0.621773267644959	-0.653726337646978	2.28078075689285	4.86016179315795	0.0454293273713324	-0.901891580690225	-0.0994839924508645	3.27688782861634	2.7207854195175	1.22127733690698	0.0327432276650969	1.54301185126405	1.0412337966853	2.80755364298452	-2.69650584302702	-2.6776259036358	-0.333893491757471	2.22285111186093	-0.990403306878223
iPSCORE	92516175-d525-442e-bd5a-816a1962d37d	0e55634f-9393-4a55-90df-3ba2d13edbb0	0e55634f-9393-4a55-90df-3ba2d13edbb0	UDID009	38343454	74.46491388	5.96159647	0	0	1	0	0	0	0	38.3899011470364	-4.19390848187106	-9.1749964374392	-5.35286128101903	-8.28608408904012	4.14384581264522	-1.05684662343089	0.0918514293620356	0.123828034724719	-1.02971464717774	-3.87011460045794	-6.55895600037926	4.00032602291038	3.33351487944906	0.613897929689748	-1.19062265209189	-6.25010372664433	1.33194726465723	-1.93043724861918	-3.08626931052569	-0.0421186423433764	1.05132737102824	-1.65200987694049	-1.72125315951317	-3.05977919992401	0.285412435143336	-0.436170051147519	0.126498652386314	-0.553919607399712	0.14469833203139	-0.119117449874569	0.866043000703317	-0.483894865215792	-0.605085582164565	-0.316452149752587
iPSCORE	9d988cb0-01b1-4d5d-bf4b-3fd3baf149a4	0f8dc931-9339-4545-a3c6-3d2710174da7	0f8dc931-9339-4545-a3c6-3d2710174da7	UDID030	53221820	72.62637392	6.433218556	0	0	1	0	0	0	0	35.2673551058769	-2.69728854160882	-10.5923277890139	-6.46339565639426	-1.46669445273198	1.56762425828536	-0.297967705628148	-0.82709073184724	0.297586246838751	-0.376805835805211	-2.15369750487647	-2.32218630850769	0.603701234034322	-1.63443001901486	0.117365628958199	-0.344518261949904	1.0597134210466	0.311294853115711	-1.20378407842731	1.75553382617298	0.0716082273225552	1.51510782327727	-3.21675500126089	-2.27952154766188	-3.80453754680368	1.1433908728558	0.0229014735937528	-1.44655847380568	-1.61163242183591	-3.7413180175159	4.60739184995803	3.12712830648064	2.16986651195239	-3.03536321843676	-0.755700871610146
iPSCORE	56f0f073-725f-4cec-b8cb-db6ad0dc2ac0	10945496-f15f-46c1-b7c7-a94379658d42	10945496-f15f-46c1-b7c7-a94379658d42	UDID181	46441224	75.98425054	5.427445237	0	0	1	0	0	0	0	45.0650156774689	-12.2167548028703	-3.53126787813362	-2.1171080831661	5.06547954966495	-2.86672777665923	0.83709681637304	-0.400367865130682	-1.06222500486614	-1.73247133925889	-7.49187139417329	-11.5860762380275	0.705659126396562	-0.626522021569628	-0.0787847996969399	-1.0974474059832	-2.42488679929246	0.197531021170869	1.63304561758621	3.08711646147034	0.402579008615565	-1.04623841743928	-0.191967380284224	-0.575658373677285	-0.797705475607354	0.367134596101989	0.562567608684987	-1.7482489012009	1.32829267448665	0.109625994978823	0.903709066143536	0.421741965765977	0.58357058392817	0.27386077996589	-0.392472098501363
iPSCORE	62d833a3-87c8-40a2-8261-d172f4c0e7fe	13756c7c-77dc-46d3-9c14-7debadb42dc0	13756c7c-77dc-46d3-9c14-7debadb42dc0	UDID091	47391668	78.63788631	5.055601757	0	0	1	0	0	0	0	41.8122775642419	-6.91389905202473	-10.3391686570583	-6.91334488480791	2.05618415142133	-0.10243802838796	0.323877700489139	-0.0487310814914964	-1.08608638877335	-1.53147140058417	-4.92817719675775	-7.13508060449221	1.53936194655101	2.10336862809314	-0.667962394158667	-1.044078539701	-5.1795950123576	0.825510464353786	-0.14740597590667	-0.71289567788289	-0.172221029836577	0.572966200865437	-0.948027348251416	0.78009850389657	-0.174190304078847	0.259194076623746	-0.203758306302043	-0.119282607780729	-0.528772011272853	0.438228108539059	0.694025612359069	-0.885080555838054	1.68423033918451	-1.22971034791842	-0.823079158450465
iPSCORE	5482a5d3-6f16-483b-9c14-ca2f838d6af9	13b129fd-2c4a-4d12-a21c-3534efa9babc	13b129fd-2c4a-4d12-a21c-3534efa9babc	UDID146	55152417	84.12438751	8.566433272	0	0	1	0	0	0	0	38.3761798199793	-3.95887011552198	-12.6075255168804	-7.79946428099521	-1.05252789227878	1.31277148987633	0.118259312444831	-0.670235002179398	-0.172982109815214	-1.01933105326911	-4.69412320093349	-7.24071283172925	0.891527360558561	0.0932220349128805	-1.32811254881543	-1.70521136645595	-6.88911201419072	0.920644044682432	0.719681447527996	-0.268942305889838	0.405792856068804	-0.970191566924345	2.00525938386553	1.15690749821662	6.44300266042314	-1.73333410748134	-2.54325468027305	3.16030512353516	-1.32892907844064	-2.8391844699874	0.735116273387123	-1.44045726757155	-0.173472445871138	-0.0260858723886214	-0.876034646390161
iPSCORE	10f10a94-511f-4538-9c0c-cbe5fdb14b6c	1418f45b-e731-4180-9c3b-990391b1ff49	1418f45b-e731-4180-9c3b-990391b1ff49	UDID155	38048978	79.40267936	2.554833404	0	0	1	0	0	0	0	57.3764276071896	-32.8222723052387	38.3555770505486	24.4230198682946	-22.5163709350647	5.34020171304193	-2.13580995038423	2.85319949927689	-0.19265973711832	0.88955653501419	0.043243594180666	0.0719134866408484	-3.30177921752556	-4.70919579613758	-0.253572232112436	-0.509797827803176	1.82001961958094	-0.298493580244743	5.49459335774238	9.77351008999194	0.945231159970448	-2.20611262243482	0.540174596406135	0.0222553738801605	0.202637453430425	-2.52304240027778	-1.28175975238261	1.7560391842057	-4.74609384881574	-5.39722420509244	2.02171309386331	-0.0395318532120665	1.62789301109903	-1.24986706443684	1.16275269910481
iPSCORE	fc1dff0a-6a95-42fe-9dc4-362e27330bf9	17891495-09c9-470f-a50d-244c4ae63ccd	17891495-09c9-470f-a50d-244c4ae63ccd	UDID248	43369254	74.55294481	7.626416631	0	0	1	0	0	0	0	35.222039879073	1.12557627430828	-16.365083310798	-10.541878831577	-6.56422910500817	4.08551459647463	-1.35889894340306	0.900036437080487	0.386401929162769	0.390731216211035	0.520842973502062	0.963529813867286	2.56128807486751	-1.12726129086467	-0.00671291831040402	-1.34983087164277	-4.16535478721137	1.19150840756312	-3.05541251043993	-5.03715487314928	0.185919133056029	0.793211101687851	-1.48765386906174	-2.86931968100919	-6.15421038367901	0.00945417350125493	1.17959739277974	-1.55264732471342	-0.229478579288603	-0.912581488589744	0.246141765102863	2.89947705212433	0.232261378997089	-0.0751772325484641	1.51188118221138
iPSCORE	60bd2a54-fecd-4c6e-8442-b13f66d869a6	1957bd34-8e9d-4190-b4e2-b3e548ec6b86	1957bd34-8e9d-4190-b4e2-b3e548ec6b86	UDID014	38151974	74.99489804	6.6774212	0	0	1	0	0	0	0	42.7922922643023	-4.05998874227492	-20.2269324747996	-14.4966548341867	-1.56434922844136	4.58995338804996	-0.755616817581294	0.0568510413504725	0.513139530470841	1.38883741452922	5.2974561994469	8.68139942874773	-5.10008532501573	-4.99026822094402	-1.33682225046446	-1.21758488556514	-1.85165009617656	-0.439131021165857	0.7752726396331	1.07680600902075	0.202117499180789	1.15942821104974	-0.627587850945411	2.93074378349414	-0.801838827476436	-0.486563947692047	-0.352250408516373	2.4946821978241	-1.8004888052669	1.75384240514713	-2.88345448480116	-1.6789371807061	-0.0440215480399895	1.42764072129746	0.331119488437027
iPSCORE	17911abe-0893-4919-b45e-5df3d3fe63c8	1bb91c1e-4b24-4d08-9701-bf9f1dcf51c6	1bb91c1e-4b24-4d08-9701-bf9f1dcf51c6	UDID027	47698678	79.55261989	2.099106395	0	0	1	0	0	0	0	54.2005129386044	-36.7014193371033	58.9075335786961	35.5531827470965	-45.8084116636221	13.7812270983001	-5.06646300310529	4.64564724914068	0.99471741385179	5.23615239241803	17.1291961733283	22.8915244363796	0.335576890187456	5.88392199301784	1.28080939977798	3.8515276583833	-6.88594406322209	-0.604643494170964	3.84584916109279	-2.20560201656283	0.000357684546883777	-2.80400937726836	7.59859786532812	-4.41547896591009	4.66487043191692	-4.87860384066253	2.34861099868979	-7.75331723438375	2.48776434995141	-6.98820484216915	7.31864196029586	2.87000985877025	4.2776986636344	-1.28512100305215	-0.587151004663903
iPSCORE	72739241-3ddb-41ab-8438-150e20619de1	1e030be8-3362-4f86-b15b-2aaaff1ef35b	1e030be8-3362-4f86-b15b-2aaaff1ef35b	UDID241	40398472	75.48149346	5.811467325	0	0	1	0	0	0	0	37.3917213055057	-2.02943014581132	-13.6933238353744	-8.45780258985237	-5.39130412888636	3.66183227571041	-0.587943126658321	-0.0614272015079763	0.273779111079511	-0.651329368333652	-3.40046052425865	-6.44400878791204	4.10653370089649	2.960982929488	0.590285196826611	-1.85365397732196	-6.25978735721648	2.18035907377185	-2.63146432262601	-3.97976492980139	0.0646681130947015	1.24981926054721	-2.83661154865339	-3.87672513948258	-6.56246183409637	0.314957297876214	0.75968854207801	-0.625311418027206	-1.46369757259797	-1.02564637343585	2.9023768834478	1.92577602133758	-0.467380246062665	-1.00566051162478	0.516231505388254
iPSCORE	21f44f41-69ee-427c-933b-a0afdc16a0bf	1eb2f150-f6a6-48ea-937f-38495099ec35	1eb2f150-f6a6-48ea-937f-38495099ec35	UDID225	36201618	76.47188587	4.577099289	0	0	1	0	0	0	0	42.3175474259121	-14.2320219716352	12.9624713773758	8.58310727928217	-13.7529082740356	3.06454510878004	-2.17524915923228	1.221941877083	-0.894363420869699	-1.68264106927002	-4.72539580622982	-5.90328985561579	1.64297837730742	-3.4948298129076	0.0370009796811594	-2.6941813274329	-0.614624833843718	-0.180756062911349	-3.8332566967391	-10.741309126672	-1.4472740678938	0.373734473600976	4.60352239835994	-4.57691434141977	-3.63109088477864	0.295793460431475	4.65431552156903	-9.758723385949	7.98348922428739	5.28669000442666	-2.52250480902847	0.279734795199764	-3.01583069654373	3.49264809556087	2.55326234186577
iPSCORE	f80deca1-0641-4a52-86b5-7b01c227ba8a	1f05f617-aedf-4970-9ab2-10b32737ffd7	1f05f617-aedf-4970-9ab2-10b32737ffd7	UDID125	38951058	73.3324933	6.54345769	0	0	1	0	0	0	0	38.3052828083831	-5.49482508851455	-6.34261438583005	-3.16737568791613	-3.5015747823848	0.421007595826186	-0.221917152228595	-0.413210551546886	-0.114900377089204	-0.971843817248703	-6.02962773704005	-8.95134170589688	3.66886805397957	1.77448350334797	0.531363210278838	-1.33527078546925	-4.09099295735149	0.772653598177358	-0.596882318603937	0.781956388826113	0.0710866186598394	0.115445772692129	-1.27125980422204	-1.2736174276452	-2.80467911922981	0.676047413066643	0.359496461097476	-1.21125388508505	0.101484941824963	-1.28099953262174	2.05688841827265	1.43847286125051	0.573971195521102	-0.812448270329415	0.647691021626898
iPSCORE	416e2905-329b-44ed-bb02-8a3b1ed6847e	1f59047b-9ba1-45d2-93f5-4f669be31732	1f59047b-9ba1-45d2-93f5-4f669be31732	UDID240	37590448	76.80072874	4.698140336	0	0	1	0	0	0	0	50.4939417480727	-22.3350683320252	22.7279643541771	15.0901166701808	-24.57593798278	7.98186473287532	-2.43420319602631	2.94985705792119	-0.156054675563156	0.165619152124947	0.403639639760971	-0.524605216838907	4.2375069520391	7.67469570856202	1.53349473730677	1.2351087801744	-2.09607473389339	0.43798180258807	1.56174625557184	9.46840285587835	0.200832249371323	1.18314017157059	-6.41044062780288	0.988898962389219	-6.54858208654926	1.16329816350098	-1.06144318602835	2.86864029165414	-3.27878299268715	3.78131153269558	-3.52203690438268	-0.735296813305158	-2.00999359887834	0.74838044722331	1.65225779673876
iPSCORE	cfd3b543-2da8-4262-ae36-7ee27c0b5c6b	21f31a89-cbae-4252-8b47-a983fd2eaae5	21f31a89-cbae-4252-8b47-a983fd2eaae5	UDID078	48055480	80.76343426	2.143027184	0	0	1	0	0	0	0	52.9674345762152	-28.3648302887827	20.7224851258794	11.0674092177827	46.172997515585	-25.1142764869096	4.81102329519092	-3.11865468247555	0.985464681421593	0.965356586589375	8.37599503989342	13.8550428235796	0.231570816229113	1.58625084682153	1.46866112939125	-0.766223477684877	-7.83023909351112	1.3255315267152	-4.79731693129992	-7.49587016397724	-0.208816296156436	6.02557734978084	-6.33415164452119	2.23337566865976	-6.69323220249219	-2.61152075684886	-4.70636193993045	9.50630162420962	-10.0201510708897	2.26912759832833	-6.86226758985871	-2.43657171754013	-0.618199039652084	0.107557348728544	0.279214230808347
iPSCORE	201da1fb-3779-4344-af69-6e3bf1c58261	252626cb-fdee-49bc-b39b-f7e2d330f56a	252626cb-fdee-49bc-b39b-f7e2d330f56a	UDID142	55125476	68.08694768	9.618032142	0	0	1	0	0	0	0	35.6425412035385	0.613053737892947	-17.8347720595155	-11.0778948328347	-3.71491238589884	2.16351197933941	-0.943907742335542	-0.514947917840981	0.0960227192867786	0.826438136113484	-0.462491681277063	1.34801496272206	3.71036202854544	0.733147607291587	0.585705089559554	-0.529799459387149	-2.97737778545211	2.07697792477543	-2.91769784932179	-7.05279841032353	-0.304424128998875	1.13790003855799	-0.011696160055031	-0.320369163795655	-1.68161391052775	-3.21169472999465	0.0990031958480562	2.10209101914513	-3.93441936814451	-3.43302694567041	0.780981677506345	2.18468750233337	2.57341671330691	-1.51251107629618	2.69671012829461
iPSCORE	b9e30469-13ad-4792-878a-889cd6480f91	26e04bc3-24e8-4565-b087-cae1acf0bbf7	26e04bc3-24e8-4565-b087-cae1acf0bbf7	UDID003	42119656	81.31002304	8.760997478	0	0	1	0	0	0	0	36.4752639761527	-0.907779987731915	-18.0199593080257	-11.9372220530475	-2.65506577278922	4.15636460293095	-0.439627723101624	-1.0878360646225	0.599363103950508	1.2841443586378	2.18397684347117	4.74892292751953	2.9847774946672	3.03456945884062	0.852600954050361	3.15175302815082	10.8304074111196	0.491914647122388	-2.54334290142693	-6.0708372958281	-1.03850528028372	-0.375378394718458	2.6843558657736	-0.0509805935616417	3.70142904388103	-2.66640268312102	-0.657448191647957	0.973515269813671	-0.480620814971988	-2.64449612085454	-0.787111524345723	-0.331842793058726	1.14337279596706	-0.396079509284498	0.293442064572247
iPSCORE	f772212a-cd98-40f9-bdcd-e75740c1f6be	28e21163-cd01-4302-a75b-440b772d54fb	28e21163-cd01-4302-a75b-440b772d54fb	UDID007	49535686	81.370796	7.12038186	0	0	1	0	0	0	0	42.3040348973501	-8.43602764213716	-10.8010395755819	-7.55776649705216	0.590300564085513	3.76478432523434	0.524892383487599	-0.966674589777747	-0.460260873126979	-0.615344955372767	-2.18617283000716	-2.18544633265036	4.9063965624528	9.96033345215083	3.01182484039659	5.89327576623711	14.3406365320109	-1.26758530515347	0.440971865201657	5.84797995649278	-1.16731474504345	-0.443381847230562	-0.352492523233243	1.86362592883056	2.74828499602787	2.71044564410567	0.823818038874307	-0.851765134951496	0.188822213250571	4.94053345120583	-1.90641685908006	-2.85304020290974	-0.154313549416938	-0.281691720088879	0.41715613791292
iPSCORE	9e7013ce-054f-46ae-bc49-4abe5d53d88a	28fbc85b-148d-4935-bbfe-0572e1399eee	28fbc85b-148d-4935-bbfe-0572e1399eee	UDID152	49892672	69.922573	5.907649123	0	0	1	0	0	0	0	42.3753219007291	-2.96595024398548	-22.0528530959752	-15.7199547105861	-3.66393108574951	7.80317767258558	0.126417175415224	-1.13436081279263	1.27478408972947	1.49128180024978	9.32226474181048	13.2814787718492	-9.30158103725473	-5.98702185879954	-0.314852415643281	1.03947543632135	10.9661741866055	-2.20882164351417	0.868440617648942	7.00064706876234	0.739043484393537	1.87151168635443	-2.99696876687861	1.9253752668011	-1.22271967674642	1.69927261682775	-1.55881099163645	2.99395388242075	-0.861060069912709	2.82487491869027	-1.85341523334302	-0.325361500287628	-0.293655270221087	-0.657503022614507	-0.32013640360938
iPSCORE	fbabd331-fc4f-47de-b4d0-a9ee5434fa5b	2987ee0d-423c-4381-bb96-a58dcc1fc479	2987ee0d-423c-4381-bb96-a58dcc1fc479	UDID115	68376214	85.82310802	4.137912637	0	0	1	0	0	0	0	43.6290362780512	-14.5688625984753	3.54840387769337	3.26260060720505	3.2608401990296	-2.76833849456682	0.261474046410404	-1.11599967502137	-0.499892819646771	-1.24630580627822	-10.2862076982946	-13.0579201975182	0.228122067205335	-4.48103247290413	0.261070176141087	0.173002853321188	11.7919075444194	-0.56822110030951	0.696256685287935	2.67068198733568	-0.181128954252072	-1.14912478035608	0.0214386698700554	-0.0424178768916443	1.00043161884247	0.849840195251694	0.883807531411633	-1.08928954121656	-0.769434093572903	-1.40026782395691	1.22284767969448	-0.465218111514884	0.255735227125353	-0.361823494411884	-0.120179814225314
iPSCORE	659c5acf-5cae-4bfe-8c9f-dff532a69e88	29b9ec5e-12a3-4490-b44b-57f976f079d4	29b9ec5e-12a3-4490-b44b-57f976f079d4	UDID156	38166352	76.6619613	4.137906604	0	0	1	0	0	0	0	48.759298703062	-17.6188991219784	2.70152592386766	0.972197709456603	9.44915806957528	-2.82864424070005	2.05499149312152	0.311413533191822	-1.34330232093472	-2.25791275443066	-6.90912395654225	-10.1066714035525	-0.0576439537487376	2.60605194545709	0.236216758732022	1.01562490702548	-1.84984175755708	-0.428808692378384	3.15432264922558	11.8020100016257	1.51558444278558	-0.21329946368587	-3.26877794041865	1.0018035478124	-1.13944970767643	5.41885047535117	0.786473995254392	-1.85847590934408	2.6009201448291	4.5379425984988	1.14352736282296	-1.1815810554528	0.383822181044648	-0.528941151667087	-1.08829391272647
iPSCORE	6814c7bb-72dc-4760-bee5-dacdb499c255	29e23dc1-6e9d-475a-801e-a9b52a9f63f9	29e23dc1-6e9d-475a-801e-a9b52a9f63f9	UDID170	55726138	74.57323527	6.186759255	0	0	1	0	0	0	0	41.6182085344223	-10.3793393438024	0.337718111715886	0.951371814041674	-6.79386204576576	2.91531295145893	-0.270471618897967	0.225000937131899	-0.377772760112634	-1.41568479973168	-6.11136980580584	-8.60653427370707	1.40424795365094	0.243788695852175	-0.263271137423102	-0.782230118970693	-1.60642561240474	-0.107416408689028	0.486997671427132	4.11586621762055	0.608725216205209	0.870880797226868	-3.85110262603752	-0.931118676004401	-3.34932000314091	1.22245899750254	-0.388181442368397	0.303854562060615	-1.20855802255605	-0.718622842712591	1.14201920609165	-0.193066119506392	-0.759261916136422	-0.869717023908148	-0.555286616757257
iPSCORE	5d86bbdd-4854-449f-b99d-0d04d0ce4ee8	2abf7677-ca02-4134-b6f9-36681cc3dbf6	2abf7677-ca02-4134-b6f9-36681cc3dbf6	UDID169	52038762	74.45953845	6.403653492	0	0	1	0	0	0	0	41.2254872333438	-4.09326073935061	-14.5380655789826	-9.42676604458299	-1.63552980966298	0.796675714120822	-0.350507106716727	0.0301272635959498	-0.815462626996437	-0.867489401407206	-4.5424583220935	-6.88723686737758	1.60986787924709	-0.632678848812014	-0.783669396877521	-3.02253855322459	-7.99468480213486	1.70832303899116	-1.14279423898391	-4.06615318629098	0.340990281179408	-0.0798547945903846	-0.327895141548495	-0.213612651764419	-0.535348494588826	-1.9507513545102	-0.788124461562474	1.79238704995679	-2.54950900051927	-3.30522565968054	1.37250723111148	1.11255501449988	1.71957742688031	-0.843173006257049	0.0328865040173787
iPSCORE	d6646110-a6f3-4176-bf1a-92a51ed6f4bc	2ae3db36-fbda-40fd-802a-1f06c14bf14b	2ae3db36-fbda-40fd-802a-1f06c14bf14b	UDID243	40996110	73.58127393	2.990800835	0	0	1	0	0	0	0	51.6587406995858	-23.9524054705558	9.83659567448728	4.57749429525917	32.6864330437957	-14.8402379846086	4.71911208162864	-1.85360880901129	-0.433778050272465	-0.0321877183160091	1.63881393711657	1.11693662936557	2.97847323224857	8.79243904259239	2.2792802813176	3.53425559320641	-3.96531393164273	-0.0638736631457912	3.74327055374437	6.15767858082972	0.644418739784054	-0.8956331081834	-0.972953362266796	-2.83084894178202	-1.38664554974179	2.57932533681364	3.45491954224616	-4.73618251266746	3.43510673730702	-1.47711853402164	4.19805591262971	2.80844933564528	2.05815209400498	-1.86496198259868	0.0683958968909851
iPSCORE	27d69b74-d193-448c-91ac-2b7fb07a49ac	2dc84b32-b750-4675-9341-0016959e7f61	2dc84b32-b750-4675-9341-0016959e7f61	UDID028	53125518	75.15828834	6.729869439	0	0	1	0	0	0	0	42.5035638100368	-3.26394872841267	-22.0760656677182	-16.0281643627907	-4.57911079815659	8.31406845560432	-0.557172736175245	0.292754980567558	1.40673684895044	1.35591645166476	10.0643205137049	14.4206923054822	-10.9469533461193	-11.4723790956297	-1.7754500446958	-1.63023238666946	3.97629923490325	-2.33507304445399	1.28477216840958	6.26957819341576	1.0340677558572	1.14863345312083	-2.6217161838498	0.74286334874313	-2.3109706842965	1.62136620031616	-0.831778633427287	1.60491970256117	0.123849751632747	0.681674049255223	-0.754621786990243	1.53511598072848	-1.01807007746708	-0.594721627782662	-0.550908048051118
iPSCORE	7efe2fbe-251e-4c1a-9616-438a26f42a5d	2dfa58c7-ab29-4889-94b9-bd02bff13025	2dfa58c7-ab29-4889-94b9-bd02bff13025	UDID012	41130122	76.04691277	5.47549555	0	0	1	0	0	0	0	43.6201448104343	-10.1503271777262	-6.10474851240034	-3.69164378876963	1.99544960403725	-0.652688719125692	1.01890129983904	-0.916690898295175	-0.129067754159607	-0.985255396466836	-4.02792749479013	-8.26806857637259	2.32035103670459	2.79498042786115	1.40494817180624	-1.21745475284441	-5.41396418222451	1.05618698878652	0.0910990205773502	-0.294960528624452	-0.178283868067174	-1.22861540430978	0.352004310997143	-2.55764983632923	0.502832288446131	0.238987638750652	0.0882280763907751	-1.72687746800964	0.842360378754717	-5.24756661576458	6.56029740244078	2.85483253320258	1.90808110161663	-1.16258556630465	-0.325726906312345
iPSCORE	d15cdce3-1f22-4224-8ae3-0ff1b878e111	2f33bdf1-da0c-4dc1-9d96-0bc6f78759c7	2f33bdf1-da0c-4dc1-9d96-0bc6f78759c7	UDID150	47835184	75.84627667	5.912844403	0	0	1	0	0	0	0	46.0461091421955	-10.1753344960918	-10.8412785362882	-8.39556876267673	5.81163486017458	-0.523254496218049	1.28489867067121	-0.687320113661763	-0.748526318847759	-0.558934003765257	-1.63822595650696	-3.60454301695541	-3.9624490311493	-3.49116906199241	-0.924903100236277	-1.49058739517272	-2.48444418413721	0.204343655931475	2.57697378675952	5.64870657061967	0.850788366544571	-0.932666881299306	-0.17049214472409	-1.24921550126082	1.98331950428915	-0.109999028480951	-0.284886044801457	-0.875336828536771	0.0794551836629886	-3.74048776105014	4.69923241422779	1.30825845604807	2.07846011138704	-1.16324431103715	-1.36342059594689
iPSCORE	5bdb8207-56ec-4f2e-add3-3ce3fbd4b1e0	2f5df117-c23c-4d65-973a-7ecf51dc7d3c	2f5df117-c23c-4d65-973a-7ecf51dc7d3c	UDID046	46937760	79.58210618	2.994207649	0	0	1	0	0	0	0	56.6098645541246	-27.7525441864708	16.982874757011	8.42361351033683	31.5825481968856	-17.6357791369355	3.51538251268521	-1.43703285723526	-0.814722852975981	-0.37852005675578	2.10495942611975	3.24583255035789	-2.03340185235722	-3.44247816285042	0.507914837394423	0.352203947506248	-2.68609403395754	0.00585595492165061	-1.48736008701663	-8.51459975528074	-0.583244472553516	-0.137355110414769	4.0873798391963	-3.59513055730077	-1.03422207736204	-0.319194632551822	4.19463035798703	-6.22370240772278	5.18242204930794	0.508136605670375	2.10333602589356	2.25760953532943	0.201587715828748	1.45884546014412	1.67379600357031
iPSCORE	bfd08f92-7030-4c34-849d-0187c8e88c74	3137b456-3681-45e6-be82-bd0264faa57c	3137b456-3681-45e6-be82-bd0264faa57c	UDID066	41455050	76.48007661	6.595046924	0	0	1	0	0	0	0	41.0800216564079	-7.71144963012707	-8.8101311397655	-6.06565320986487	1.44201249934183	0.89258049638764	0.228313526909557	0.0238903301047172	-0.361553327999742	-1.06599130126637	-4.43757985045601	-7.02563647740933	0.406805298964365	1.51305452087315	-0.452964753217942	-0.661607636396795	-2.44715016206019	-0.123203590218051	0.864231586980565	5.02378906154385	0.346862802099248	-0.170046340580426	-1.04609563892972	-0.0246273069844783	0.105898574210223	2.52200198197611	-0.243674664480137	-1.74073355145191	2.24122312746527	1.37019009013364	1.37415146469299	-0.415716439125685	-0.263309782489718	0.199613541936581	-1.4483396941086
iPSCORE	a314e30d-7fb4-4f68-860f-1ac1f3bdac07	3252846a-f9ad-43bf-8b07-4969e0d59777	3252846a-f9ad-43bf-8b07-4969e0d59777	UDID218	45246988	78.77265554	3.733817597	0	0	1	0	0	0	0	42.7269340209387	-9.60684301902724	-7.45357179169695	-4.55414376673477	2.80959774415562	-0.81486691668006	1.16932981697859	-0.927787919681051	-0.801642861458719	-1.53174146338892	-5.93753266279981	-10.3938746741155	1.60800548705952	3.76430960588567	0.505352875375855	-0.596842843914533	-4.55972601019262	-0.581873723415173	3.04752466245685	5.35580311956721	0.331359023527392	-1.44461911473939	0.605440600774549	-0.222998833148873	2.49741214698862	1.51345462221453	0.368789170722652	-1.98233459033651	2.24242470791982	-2.12649145323446	3.46605663185612	0.929819617464828	1.21621087469662	-1.27137467412774	-0.394753124791499
iPSCORE	eb1309e6-5567-437b-82d7-549c1c8d5493	327cd617-8e63-4295-bbcb-121bbe8228fc	327cd617-8e63-4295-bbcb-121bbe8228fc	UDID006	47827198	82.76094284	6.094561509	0	0	1	0	0	0	0	41.7987205173521	-11.2609877958388	-2.93818770547015	-1.12117496525894	8.41644484866294	-4.75071752562451	1.32469900910113	-2.72415189874131	0.282825294932092	0.241425445910391	-6.25915885758889	-8.40075650687833	5.32889712817788	2.02580865610045	2.65977505348413	2.89037792649498	12.5733803274256	1.05553599055593	-1.86879646400798	-6.60424328852064	-1.17293953763527	-1.40232316992732	4.12440566194342	-0.91275888843467	5.89352492150354	-3.21057298983752	-0.726638087284405	1.18026883643532	-1.66692453673266	-6.05259747345394	2.53744145233946	0.918718771580324	2.85415794342596	-0.690052101141275	-0.0967213781995444
iPSCORE	03235361-4310-4737-ac0b-4ce92d99fbf3	3297dcde-ffa1-437d-a0d0-be90f20b1a53	3297dcde-ffa1-437d-a0d0-be90f20b1a53	UDID025	49329872	80.57206798	1.402444344	0	0	1	0	0	0	0	49.4031568374697	-32.2351098250163	53.1891768753028	34.8601943221726	-39.2856346487578	8.99649019585231	-5.16374604328428	4.32808887887794	0.197799687771158	1.69645761837961	7.45012483156849	11.8545943947129	-1.02772509556353	-3.39479812403503	0.158574992560718	0.407869238866371	0.610871717319274	-0.598972030373316	2.65176443083897	-2.97727106040269	-0.679063290261265	-2.85840547611088	2.99136456247289	-0.876598477124019	2.10728988510159	-3.35523758860403	-0.785758066392254	-1.00487512927028	-1.52175086915803	-4.93485952949796	1.44725825371098	1.32371627158427	2.98756693239932	-0.912669409629063	-1.36000154868313
iPSCORE	55396f13-62ff-44de-833b-05fde4ad97c6	3355cfa1-1f7b-4ac3-b58e-b02b70311f25	3355cfa1-1f7b-4ac3-b58e-b02b70311f25	UDID062	52009242	83.99611361	7.087182697	0	0	1	0	0	0	0	39.6752511789632	-7.25309491766851	-6.95144387146299	-3.84891183010962	-6.08901354556354	3.50522650908094	-1.11901769391974	0.360754752479439	0.0907820844278204	-0.937501104430089	-5.76252938409763	-8.15940970145275	7.21818730405087	8.79876233426916	1.33827242949468	2.10200044942924	6.30784103378416	0.653393371685458	-3.90836028599894	-1.42492888217241	-0.868630850485385	1.22392261117285	-2.95454231728489	1.42683204521477	-4.33568159251081	2.95172986808058	0.206578904416324	0.128933627644936	1.01834594266301	7.39888284049091	-5.02349484854118	-1.34651759727482	-2.5357471041832	0.337505078563709	-0.67398965700142
iPSCORE	e932e556-59a6-4f70-9b4c-ef5f69dac3ce	34dc9f1a-5203-4354-8c9a-d2df18f0c645	34dc9f1a-5203-4354-8c9a-d2df18f0c645	UDID001	63151766	82.43841985	7.591214472	0	0	1	0	0	0	0	35.7888809489108	-2.54561815170793	-8.09042278123794	-5.24643716732007	-11.2494309391135	5.6389483241472	-2.49740068740099	1.40011193436035	0.221728899269914	0.697095092705929	0.850882263500734	2.32991710307633	5.00621116896258	4.08206913967103	1.49124771872536	1.82384646004165	5.04684656314334	-0.880755312927253	-4.69618015391805	-8.01998735634863	-2.03249738912392	-0.880667886593289	4.75099776866038	-3.70230409866331	-6.36683924222878	4.30302691286989	7.65163548567414	-11.2101393258555	10.3946940795147	11.509388187713	-5.39006727617513	1.39982192494452	-6.14457664006352	6.13462395626811	1.99495485031614
iPSCORE	eb1309e6-5567-437b-82d7-549c1c8d5493	35ea7c61-e799-47f4-b537-91debbb78769	35ea7c61-e799-47f4-b537-91debbb78769	UDID071	53054762	83.88081733	6.210021261	0	0	1	0	0	0	0	35.9769762557947	-2.21166143107838	-11.0832308343803	-6.58627984688384	-5.46124930974865	3.77177989233608	-1.01956795333267	0.818237308668623	0.205337652472911	-0.110155917506559	-3.26883652703155	-3.16257247343122	6.61693121199013	6.96327365980437	0.992684362098981	2.04234099823581	2.64777754509384	-0.256941338044988	-2.06578718336284	-0.422161155261015	-0.781311403001449	1.81332536735205	-3.37103881208823	1.39448142654638	-5.9481995434963	3.16771227635315	0.405348149684248	0.0445325436614591	1.07594048936302	9.15072363380003	-6.98380353474807	-1.61441498103093	-3.85287747624336	2.70645055105573	0.404447668347972
iPSCORE	9603be9a-f146-4fc5-bf36-c84fac189b0a	368586d8-77e9-4c67-afea-835abe7ad3f0	368586d8-77e9-4c67-afea-835abe7ad3f0	UDID145	41320296	75.15238032	7.024756067	0	0	1	0	0	0	0	42.2668267159424	-3.26490606744796	-19.8268923594436	-14.8147615348734	-4.88514360482435	8.15862957665008	-0.66743554238372	0.54267718078146	1.05065020350056	1.39544004498808	11.9915678995094	16.4906174324711	-10.7207490914704	-11.5878345079508	-1.20680217078471	-0.736787627644597	5.49008866565373	-2.79986010627307	0.49629228783575	3.7976701764226	0.534600034542851	1.04901195217986	-0.368515072852148	-1.66284780898318	-4.86691888513135	2.91904931305168	3.43416791820663	-6.03127176368521	4.94068580901463	4.21677813345908	-1.13877431323525	1.25377712064805	-2.05773188281232	1.60108024970839	0.425999502641477
iPSCORE	5595871f-2997-41d2-b749-6ad518e89bd4	36e4613e-b28d-4185-83ee-b949af273bfe	36e4613e-b28d-4185-83ee-b949af273bfe	UDID189	40461602	73.84079355	6.897601336	0	0	1	0	0	0	0	40.6679183919613	-4.04723770095581	-16.0242571327182	-10.9987502575479	-1.53475370133924	2.93441652819508	-0.291218337450603	-0.233668605343791	-0.445477701451814	-0.688878427552937	-0.589321395749927	-1.4346551643039	-0.250868637426732	0.39809390904112	-0.729020832402327	-1.04783821275152	-3.62336574627762	1.04794449927823	-0.580705159380044	-0.230492839694608	0.313514361047684	0.743427138523568	-1.74347357946916	-1.17252106618796	0.0465489284631369	-0.766923298853827	-1.20272895419962	1.15921977382165	-1.71464891982952	-3.99898492813937	2.93962155866965	0.988283254349991	2.14634157562918	-2.16425236698596	-0.574500525206388
iPSCORE	168437ba-e29e-4439-a508-23d44075022e	39e49afa-4934-43d2-9c75-dcee95373569	39e49afa-4934-43d2-9c75-dcee95373569	UDID185	51017796	79.14733126	3.654489504	0	0	1	0	0	0	0	46.3664462106637	-12.8054026501922	-5.36004951632294	-3.33860049657236	3.68195181069719	-1.07978950038655	1.18858461951238	-0.181540128942284	-0.792695590757445	-1.83875209867883	-6.43391757410197	-11.7322128845492	-0.0663621450155963	1.359796430612	0.0227909336874738	-1.83460956928479	-5.59022904102448	0.976802471852349	0.559772548351451	1.94747329799342	0.516979170517271	-0.517335367419273	-1.5532935169018	-2.01792488776132	-1.30193504770255	1.96458533394517	0.321434480704796	-1.43379958824225	1.12237424658815	-1.1958472066795	4.9851831989995	1.24576226909114	1.01174624969706	-1.67252791992295	-1.61805450454672
iPSCORE	97f20ecc-a17b-4d10-b689-908f5b9f3ddc	3a08df95-67b6-450d-b6f0-eea222445327	3a08df95-67b6-450d-b6f0-eea222445327	UDID047	36626900	73.2267268	9.618504433	0	0	1	0	0	0	0	36.4796394090133	-2.43526371214532	-8.72444227355598	-6.08906517081581	-6.11158314013923	3.03631018790745	-0.538314872814187	-0.329441982237069	-0.411278382105101	-0.221971330992532	-0.209021477483317	0.180219249320213	1.19562477301327	0.230533497308206	-0.473801043797601	-1.71598161348752	-7.44955356805972	0.16937069328743	-0.236120076526541	-4.72954825983984	-0.614358228293522	0.709210037023811	1.61604087306306	-1.46237879405859	0.581006204460007	-1.62042051359689	0.24496009661455	-2.25435670117525	1.32463543028882	-3.90200227862457	2.94556088025294	0.501232746929929	0.960021943405925	-0.836177032749547	0.0271352039176724
iPSCORE	bd41b7ee-bc24-40a9-99ab-483b2dbf95ae	3bf24410-4d99-40c4-a0a6-e1af10d336f5	3bf24410-4d99-40c4-a0a6-e1af10d336f5	UDID109	71414210	83.83191945	9.70366822	0	0	1	0	0	0	0	40.2803554892059	-3.78282770799338	-15.112399258632	-9.93375588571262	-5.6981631170369	4.20924834336391	-1.08576796574775	0.00760517638592834	0.425861795123624	0.727695592400255	0.837833029353238	1.77832432797382	-1.6857602701404	-1.74887137996806	-1.20076807580322	-0.683575368308044	-0.163854740254615	0.044069158230245	1.00925751081842	-2.35754875847406	0.174653492728873	-2.07366158203336	5.24642647785359	3.30608916358161	10.0506252255991	-3.27258135731515	-2.65355526143826	4.90661261681936	-1.15042036446324	-0.104946590308479	-3.17711728526429	-3.48799623887488	-0.806569010756408	1.86784555339278	-0.452416898623314
iPSCORE	f0b9b314-5e83-4975-af42-54ee03bcc459	3ca8db47-fc42-4aac-9269-bf98e9a924e8	3ca8db47-fc42-4aac-9269-bf98e9a924e8	UDID013	44770954	69.74451337	10.29970458	0	0	1	0	0	0	0	36.5453182153092	-0.568844077434153	-17.528821579452	-11.7788448102895	-2.84161673547942	3.67264241702039	-0.582938753444072	-0.813979798888632	0.779750977567803	1.33387299310235	5.08279885996071	8.87130276156455	-4.31599812626984	-6.94425626011884	-1.52186660524497	-0.970608195108437	0.0697455754920371	-0.923586061353378	0.226715562464771	-0.333822214444369	-0.0108431722618878	0.556492023039042	0.00937806370548637	0.370392091208844	-0.291763276731984	-1.15876557862194	-0.374349390473153	0.296563371592984	-0.0623131771441393	-1.09681248565406	0.462699311419945	0.721666215490713	0.349625722677246	0.318772234991851	0.109751641355264
iPSCORE	8cc554f2-a5d2-4b44-94e8-0dfe3e300734	40b55c39-6d49-493a-8e98-2c6359ff1ee6	40b55c39-6d49-493a-8e98-2c6359ff1ee6	UDID178	43664168	77.18057516	6.171893622	0	0	1	0	0	0	0	40.7123703262096	-4.22667184672856	-15.5645625910884	-10.4344003560594	-2.70669575592679	3.23580702686133	-0.553427668413526	0.225666983729465	-0.205952443627776	-0.535114968363396	-2.24112850802582	-4.20722021053278	-0.62932990661159	-1.73747385628882	-0.564445772449495	-2.07107903553341	-4.58206253881439	0.677246881329555	-0.192232706659047	0.730167997344586	0.470591034543197	-0.0607639732659422	-1.5461593351275	-1.27875842983378	-0.89012226547343	-0.535717880186071	-0.392019960136161	0.749702796302957	-1.86452593951909	-3.56723670449513	2.76464462183702	1.72080368592503	0.773184147066272	-1.38807588802086	-0.536424474390432
iPSCORE	de9c74e8-d399-465e-92cd-904a0e323bca	4175c93b-c008-450e-ba15-bd3f682a0442	4175c93b-c008-450e-ba15-bd3f682a0442	UDID163	46581866	78.61712968	3.812466422	0	0	1	0	0	0	0	51.6138909440177	-24.7833264005125	24.6583947708023	16.3155742712205	-10.4870896141344	-0.0957209479426758	-0.512388240822988	0.793874188507638	-0.939725589785804	-1.17911102285577	-5.4526519453318	-7.65013329889899	-1.70819637506333	-5.68024306606922	-1.08338981563572	-1.89249612069977	2.7545187006376	-0.281997462879651	1.72333378578479	4.43109303586143	0.678205205950737	0.0622457220698481	-2.09493543767798	2.01159187053989	-1.87284881656983	-0.295667378350402	-1.28134295502484	3.37658951572531	-2.26278554917294	-0.260909939515262	-0.846909657072778	-1.64808834568007	0.0604954720007908	-0.102835883089895	1.44653059483861
iPSCORE	3bc3e7ee-9130-4da5-b8f1-52d38bfc3c70	42483bfd-fce7-409a-8f47-7a280a1d79a6	42483bfd-fce7-409a-8f47-7a280a1d79a6	UDID277	39872834	71.7190757	5.327572151	0	0	1	0	0	0	0	37.0448364416735	-3.55001949055211	-12.1679334500474	-7.71354155423504	-1.37323128826443	1.52411627702529	0.0203662436403242	-0.49160970480363	-0.37672070239559	-0.554927260892097	-3.7748401061775	-4.79791927471213	3.14797671345399	2.91804134223982	0.192653288776495	-0.338829769342084	-2.7506079570078	0.469615601099867	-1.58869108596104	0.285607157866912	-0.059164490215836	0.744740184318991	-1.53782428755708	-0.657916254477264	-2.68159980342072	0.566756025849244	0.84169476464477	-1.09036320233315	-1.08590071731929	-0.227668066705317	1.3127105394601	0.633936385320567	0.986534895279118	-1.35308041823771	0.123137838895361
iPSCORE	8039c171-beb7-40bb-adc7-3d915a97ea25	46c816d2-b3c7-40df-a1f2-3030a0fc525d	46c816d2-b3c7-40df-a1f2-3030a0fc525d	UDID242	36717486	75.71091332	5.911788187	0	0	1	0	0	0	0	41.0000225045058	-12.733327707049	10.809142843552	7.38466274885753	-23.9913442276363	8.75315709471153	-3.10069011144555	2.74935230060261	-0.504057570341305	0.415094106165052	-0.531792879876926	-0.0105226604153656	7.00274345975684	10.5469499304251	1.89676026916404	1.58783456371442	-6.93947830684068	0.951156747532212	0.135565544482786	2.18029676946741	-0.479482054425188	-0.205895434092025	-0.504586138430767	0.586198884484778	-3.21104417106024	2.14118975023386	0.655310944416699	-1.80357727867875	2.56632441431814	6.52594625533278	-5.53976453985736	-0.405860598301531	-3.23201557090525	2.79481436164416	1.37275773122432
iPSCORE	b48d5663-b599-4d02-a70b-6bd12546041f	4911c9a4-ad7d-4bdd-9ea0-758918b28a46	4911c9a4-ad7d-4bdd-9ea0-758918b28a46	UDID090	47157010	77.17363336	4.414397775	0	0	1	0	0	0	0	42.3356558215052	-11.1160114187276	-3.86444170495348	-2.226062352249	7.65209449665126	-4.67783554489405	1.07563160763778	-0.824900777450925	-0.92319785024322	-1.06885043766137	-6.23077416181299	-7.95080290078386	-0.503393266083482	-3.25599663520094	-0.825942349690652	-1.03007179427056	-4.74067228474652	0.339319094630566	2.27200704218882	0.552573690519444	0.356010098893227	-1.74756272382584	3.83394544587437	0.224641183743853	4.26477387523095	-0.0660516589305419	0.282391104989764	-2.14531207210197	2.58086619308511	-0.566087876105449	0.782077186322098	0.268850370564701	1.77528879086727	0.137259004537053	-0.549114569647126
iPSCORE	7ecf080d-4d17-4023-b024-85a5942d55fe	4a6bc279-2606-4baf-bff0-5457c81c7fad	4a6bc279-2606-4baf-bff0-5457c81c7fad	UDID104	77393644	85.69285225	8.739698314	0	0	1	0	0	0	0	41.0189951598395	-2.1586448443602	-22.1195288875678	-15.310110804319	-3.38958449942016	5.33000107429805	-0.756883032660179	0.364052515401316	0.0147116870628967	-0.577804037559148	4.32556661490457	4.84507021982354	-7.91679661142569	-6.3313450235247	-3.84415622511139	-2.77665306186144	-3.16594422100998	-1.58527642018208	2.91639928489523	2.24241248130791	1.07344229112646	-1.26797302338711	2.2705287352225	5.08808972625181	8.80510551574062	-1.94067584137511	-4.8511749817499	5.68240149669054	0.377349811644165	0.965290217695174	-3.43482543014557	-4.8853329022236	-1.31172322301493	0.416175121662276	-1.77589157945438
iPSCORE	861b37d9-64e6-4d19-8e91-96401b18a9a4	4b1c5d5c-b4e1-4204-a2f3-6f790e8f2ed7	4b1c5d5c-b4e1-4204-a2f3-6f790e8f2ed7	UDID167	61725485	84.54010203	6.711738271	0	0	1	0	0	0	0	39.9969180758228	-5.3645628238475	-7.12527459512807	-3.86726256387396	-13.3047592817105	5.42971339379314	-1.26846232792039	0.330864158983249	0.478211131369523	0.612874778678499	-1.60335231668636	-3.24502304103708	7.136137248785	10.5600105592211	2.07627043588477	1.79981860828256	-0.127819071841107	2.17225698356426	-1.75886463789068	-5.55624115896005	-0.800242970705683	-1.78677694484875	4.46730299903445	3.25436252502545	8.99692088492651	-3.41670652002402	-2.86475057120331	6.12912500843496	-1.60106169078171	0.0610732588952297	-3.94053136701136	-3.26505589141273	-0.101888110622954	0.319983405091138	-0.533067628118242
iPSCORE	c3bb6245-5d1b-4dbc-8b16-b0ca47472e91	4d3cfa6b-5977-4836-b0d1-7cd97da17fa2	4d3cfa6b-5977-4836-b0d1-7cd97da17fa2	UDID223	42640548	74.56846943	8.084558388	0	0	1	0	0	0	0	39.8203847235379	-3.87428110593082	-13.541044316078	-8.75884131953146	-2.2544991810639	1.65237543279169	-0.416190516764235	-0.00733056842896226	-0.693288779713222	-1.079595631779	-5.06237175977055	-7.28633287995838	3.19593207381038	2.35161008137159	-0.698621035059909	-1.50275044821681	-5.90445146328105	0.710672810344208	-0.759104394274857	-0.543977941370903	0.253513836706092	0.487105701465331	-2.11581543622811	-0.733684647699112	-2.22996634150062	-0.12030254458529	-0.275307166842121	0.374649796212183	-1.43657648115286	-0.73739560747216	0.0682647372869137	-0.216230684399297	0.243743971814134	-0.530707637281127	-0.137799616610559
iPSCORE	e932e556-59a6-4f70-9b4c-ef5f69dac3ce	4f7327ef-84bf-4b64-ae5f-50812d0dbf6d	4f7327ef-84bf-4b64-ae5f-50812d0dbf6d	UDID067	54332750	81.36987728	8.196062228	0	0	1	0	0	0	0	40.4532880474762	-3.01851871288595	-18.7683191269718	-13.9646044842982	-2.8983069054125	5.35094175099529	-1.47837337113714	0.375276940670626	0.294391255078852	2.09999810587144	9.86103668583131	17.1870051050963	-7.00747123012681	-7.81297858228854	-1.16589445358935	1.87109157530617	10.8304038197688	-2.76530298452352	-1.99855822743159	-4.36243398510533	-1.32458073739705	-0.834198466910575	5.39157962656589	-0.467855230507602	-1.13034268504788	1.51538241736701	6.08275866433824	-9.006164521275	7.5421209943667	8.08527220183313	-4.43223693981888	-1.09225043942588	-1.99628964964705	4.41845650289139	2.13394337734474
iPSCORE	9d988cb0-01b1-4d5d-bf4b-3fd3baf149a4	5009e877-7534-412a-8e31-c687974b0b3c	5009e877-7534-412a-8e31-c687974b0b3c	UDID257	43359522	74.93450689	5.257807039	0	0	1	0	0	0	0	39.5210954630713	-3.78197438062239	-13.5986506587379	-8.57847467747634	-6.11206407261354	5.03045891207312	-0.60597333732967	-0.142391085594421	0.261494730197822	-0.671887901522683	-2.97169659944566	-5.93388353904303	2.82777192481706	3.33232152697769	1.3010659586358	-0.888262184305351	-1.46132396039095	1.50228842474824	-2.02909637447375	-0.133057996548878	0.335630616813543	1.73932176957348	-4.38665960076481	-3.29711058871286	-6.51331498658911	1.37074934924951	0.069440282379012	-0.218399770724414	-2.66270439158306	-1.46761802205509	1.80138463888961	2.35861062966433	0.196200323193992	-1.15043048829838	-0.292385630921114
iPSCORE	5eefb852-e78f-4acb-b19e-5220cf41693a	55cfd7de-2916-4a7e-9eaa-2b16be316476	55cfd7de-2916-4a7e-9eaa-2b16be316476	UDID112	67624524	86.54719995	7.004838955	0	0	1	0	0	0	0	41.1997756315393	-2.44262415234519	-20.8379576926879	-14.2694438337144	-3.25886851429086	4.3700313433391	-0.9410706445823	-0.0832736189803829	0.12306237343858	-0.0651440380546247	3.55926417657199	5.70933610175409	-5.76007433368489	-5.84127491912257	-2.74650581000479	-2.18186300758171	-2.71043848947189	-1.35313016413092	2.1020646332289	1.36382302124615	0.407795137960022	-0.385026790057524	2.19958855981648	5.05786111221841	7.05712811322305	-2.01384117391922	-3.19190970160572	5.02516240449852	-0.443736559288047	1.19450798656524	-4.61024130997535	-3.84773836281842	-0.78733869168921	1.47126421957954	-0.633640618125596
iPSCORE	c72fc475-80f0-4fe3-b306-acebd17f3bdb	5932426e-33ca-4b67-811d-4fcaa8eb44fe	5932426e-33ca-4b67-811d-4fcaa8eb44fe	UDID141	53426312	75.63757723	6.149460588	0	0	1	0	0	0	0	45.3632061736504	-13.2559826950942	1.67388517273312	0.974759639127534	-6.18926194063802	3.05614149638301	-0.47448744175264	0.946248392022272	-0.279896220422085	-0.657479848087241	-3.24346663691996	-6.08974829178657	-0.289568912052163	-0.432133149406823	-1.23740159972896	-1.24406560885737	-2.04443832665368	0.8951656754082	1.46231547839046	3.83061133978715	0.844720574344458	-0.144776098536366	-2.30496126928451	-0.464965017438773	-0.62855097032495	-0.0131351679261008	-1.52549267612593	1.12030404218749	-1.49218116137357	-3.21655531828784	2.99997320800014	-0.118806481186165	1.49326688389263	-2.18869546645701	-1.25370783985947
iPSCORE	8dbd3466-e4dd-40a3-9c49-2e947a9bc113	59caf2da-672b-4606-9331-1463e50d6110	59caf2da-672b-4606-9331-1463e50d6110	UDID140	47458008	73.7910997	5.276382439	0	0	1	0	0	0	0	42.6898166958476	-5.33423898048026	-16.4135421309277	-11.8481911327929	-0.121003711428053	2.71173021585562	-0.0249021873714505	-0.364663025923824	-0.284455311786595	-0.197021707605023	1.08236155037651	0.686204678400947	-3.32921727125491	-1.99927917073043	-1.14836226564234	-1.07971973695677	-1.30134590837385	-0.562192849669704	1.36406188928291	3.9173502728097	0.249806810158264	-0.0505504790478062	-0.831254267284313	1.81883897974507	1.42433549118691	0.48355618728369	-0.787499196595062	0.449603644818082	0.25644636545401	0.584171008843611	0.53437314158186	-1.12136516588702	1.35218614369461	-0.900873370709969	-1.05241027464153
iPSCORE	f0b9b314-5e83-4975-af42-54ee03bcc459	5a416597-964d-4e83-8010-5d99bab309af	5a416597-964d-4e83-8010-5d99bab309af	UDID056	54789684	83.86413399	6.067751732	0	0	1	0	0	0	0	46.8843282633135	-17.2381256960622	-2.18143320607401	-2.06430793696362	19.1144885756867	-5.5069778370267	2.97705371857072	-0.813956196812799	-0.0574456304595549	0.542370250431182	-1.41284538984744	-3.23910054728076	3.53467021907625	9.58881300687377	2.31491483506046	5.4592285045121	7.30662501258374	-3.39349442632583	7.14546221526214	14.3929493710545	0.664711739314592	-4.09864885607651	3.3058541244669	0.842308548423627	3.45060501747638	3.05882582408748	3.14932614725343	-6.1096752550892	5.56634460512881	1.77882097941189	1.10420581249232	0.315616845757372	-0.737017030679043	0.917968125288214	1.6115238823184
iPSCORE	60bd2a54-fecd-4c6e-8442-b13f66d869a6	5bb6a14e-6f4b-41b7-b645-f6955dc0e347	5bb6a14e-6f4b-41b7-b645-f6955dc0e347	UDID264	35953154	74.84098335	5.207665508	0	0	1	0	0	0	0	41.8587669512196	-10.1390467721819	3.52891580866998	2.75788003272826	-20.2235179160263	7.55620939602159	-2.53593198229519	2.37231045238581	-0.0891169564456352	0.485501334739301	-0.117864463117782	-0.905064696993163	6.66702135551518	10.9266672648821	2.25792855147813	0.604231554855729	-8.4748772545933	1.84869932277367	-0.822236140728139	-0.934030446104533	-0.945168967272684	0.251461290327097	-1.54604298210755	-0.597987163683583	-2.63380651318737	-0.0297497474583871	-0.6724799952437	1.25610003192778	-0.936894906924876	3.43678595917159	-2.83079323359652	0.398552591849196	-1.30522442819116	0.321353819506098	0.0455868256779555
iPSCORE	b7af5d94-4b4a-4130-94ee-fc1f23c5824a	5ceba145-feb6-4f4c-9dc9-2b573d8d8ffd	5ceba145-feb6-4f4c-9dc9-2b573d8d8ffd	UDID157	106743073	82.21910662	10.06175174	0	0	1	0	0	0	0	37.3583383734448	0.542332846041865	-19.2395562045593	-13.0823393904361	-4.64336747642685	4.60791461113587	-0.705482191969911	-0.0555565734688805	0.632494979880446	0.922860004555723	3.37783645104654	4.7963433359412	-2.91075382632034	-4.83270449310817	-0.841317959790363	-1.69907942103981	-2.47703760294895	0.262581834744633	0.10201844158902	-1.52167636100652	0.552951158278134	-0.439641816495677	0.621302377358385	1.16578585174441	3.35156338560073	-1.73358311488024	-2.0187518580164	4.92954932642702	-3.18109814175344	-1.61063324358049	-0.666430335469667	-0.597713906199033	-1.3233446305101	-0.360109083174215	0.463626679073494
iPSCORE	21681dd8-da3c-47c9-904c-3b8a91b2c3eb	5de2cde7-9c2b-4e17-b8c6-efe956549571	5de2cde7-9c2b-4e17-b8c6-efe956549571	UDID148	41400688	74.71587912	6.767080779	0	0	1	0	0	0	0	39.2265731270293	-1.3520478208775	-18.8414274555918	-13.0709313734511	-2.14156337369046	4.10105004075102	0.209609856168259	-0.0127128646260738	-0.0981810022296641	0.672665935054481	3.65552575388584	5.05753786245907	-3.23720169251967	-3.24413466067334	-1.45406078285884	-1.33341170521551	-1.78937046662592	0.215144915558824	-0.42779740095935	-0.457961978279186	0.487518743346293	0.917548526940405	-1.48590298550643	-0.115059787644999	-1.64645220878534	-0.458788433523882	-0.429682369962621	0.936894352545869	-1.41683161959406	-1.0600548396312	1.20745404503285	0.71801777739972	1.74633214747864	-1.67897097846912	0.911903171268693
iPSCORE	ac14fb34-0c8b-4264-9f93-5ce47c071a66	5eb340fe-ef67-4da2-bed2-592187da85a9	5eb340fe-ef67-4da2-bed2-592187da85a9	UDID176	47418368	76.93178728	5.635115911	0	0	1	0	0	0	0	43.6919661595781	-3.6175307919027	-19.8672904581909	-14.1167205698774	-2.51391575273505	3.69145133552066	-0.750148855816985	0.808636010881557	-0.488490189618076	0.354597369666036	2.31850165520214	4.06827466496195	-2.11529854246286	-3.11033492828154	-1.49858816469135	-2.40605092387939	-5.59822320914646	0.367013736868244	-0.123760598208907	-2.45822938695725	0.182532145627882	0.841525913175646	-0.0743477362791313	2.81361185974503	-1.0881926478426	-1.23024814672599	-0.252296332270138	3.02349949755778	-1.56126101453291	3.70609985996496	-5.32157164486991	-1.38127466854703	-1.18174251313049	2.05736488460402	1.84842996003268
iPSCORE	ae3637d4-493e-482e-bc48-6915e30ffb9c	614b916c-62e4-4565-8039-04c47b6daf6b	614b916c-62e4-4565-8039-04c47b6daf6b	UDID029	51283282	77.85061416	3.830831264	0	0	1	0	0	0	0	50.7300508563235	-23.1492539273117	13.4406731753862	8.49414243568374	18.5173373270624	-11.482140859175	2.21675109691848	-0.659595859559131	-0.84519111107423	-2.14623501076821	-5.45714559594478	-6.93849084370189	-4.66381977277944	-9.79022050671771	-1.05393255304299	-1.83680411141897	4.30834686849908	-0.659282223407652	-1.78050408810269	-4.57178255422521	0.034368187194968	0.391568829554497	2.27360452462292	-0.413960010955202	0.263811281775357	2.6315115941854	2.32236545877959	-2.55096798751378	5.17910235385087	3.89198369469535	-1.6325629102557	1.1617591681824	-0.529575413205028	1.60969883524581	-2.24279589157407
iPSCORE	fdfddc05-516f-4408-83a3-731309a5bbb9	6322966b-f8bf-455c-8a73-2128bed286de	6322966b-f8bf-455c-8a73-2128bed286de	UDID107	36857584	86.66649719	7.173052905	0	0	1	0	0	0	0	42.8374445958726	-8.00181495158274	-9.09437136745853	-5.45420333920291	2.27502977037645	-1.22421375123368	0.517719812884304	0.814680321002186	-1.37905160644341	-1.67055416244706	-6.93756934038084	-10.1306900727806	0.271932279881718	-0.704633161561272	-1.73154656112332	-1.48773503171523	-6.97463470864601	-0.452154691728638	3.11564653541045	0.540850019167811	0.295271782076065	-1.83183446345409	3.56818098853142	4.15646435067513	7.69080021780911	-0.843882954825115	-1.76102960135521	2.83830855575528	2.06032974961113	3.10334794116263	-4.84529749144306	-4.01707529221344	-1.627322585453	3.65370722939552	-1.2956321227815
iPSCORE	9d988cb0-01b1-4d5d-bf4b-3fd3baf149a4	649bc9a3-4394-4cd7-8bea-b20c3a70febf	649bc9a3-4394-4cd7-8bea-b20c3a70febf	UDID310	54813977	87.23168363	3.971417728	0	0	1	0	0	0	0	51.3650735333185	-24.9948817164499	26.9517027074341	17.8000645498209	-33.4204658586811	12.7385357188248	-2.92281601124519	2.93288192707921	1.15861234954979	2.8634242413945	4.56078430750425	4.32432780129904	3.40477083358098	11.7674647105332	2.77938852330846	3.7167173769753	2.66325440048995	1.27246304071917	2.54112519317987	-0.0808598603246666	-0.0254437833318898	-4.71754091843682	7.96188265742057	2.48613187764783	14.6209145932046	-4.86964812513359	-2.95384811556187	7.59628670392206	-1.14632606418642	-2.54749071502311	-1.48382760636903	-0.304673452389703	-0.438614487989569	1.82440671522283	-2.30936813341384
iPSCORE	9409a6cc-0711-4583-9949-b679f66a823e	67520ca8-a895-48ef-b30f-1ecf3d2ef1b8	67520ca8-a895-48ef-b30f-1ecf3d2ef1b8	UDID203	37166504	79.79266492	2.335786008	0	0	1	0	0	0	0	58.4064359578531	-30.2095805410547	17.6629854269262	7.70653529222252	36.2571919083788	-15.6569881075132	4.59362671147459	0.323818160709394	0.5435069941731	-1.67833880406889	2.32079219149021	0.795794704595803	-2.18305272478422	2.96501366856622	-1.53804549042928	-0.808501079760439	-5.22209721150313	0.801932410051186	-3.96115617987462	-0.06687695231781	0.227580599499858	-2.00892230024762	-1.67544807671579	-1.71692189830854	0.399811219720022	4.60458398551328	1.8319606133633	-5.47254004854609	6.44604075578144	-1.29132358557781	5.67967574495575	1.98973055567532	-0.936921528332874	-0.188153643417604	-1.24482672009655
iPSCORE	90e8222f-2a97-4a3c-9517-fbd7626122fd	68e51562-48dc-4c84-a206-42c8f658ed08	68e51562-48dc-4c84-a206-42c8f658ed08	UDID251	47026198	75.68945293	5.528952181	0	0	1	0	0	0	0	40.9493699178801	-5.97194229144276	-9.96186070160782	-7.00223973083782	1.06377038417868	0.30664890891454	0.271535156787161	-0.504888790614007	-0.485477757966215	-0.914406186031212	-3.12827448246081	-5.44693608717513	2.11087891545206	2.09891562256525	0.463456532231195	-1.19949827074911	-5.64580070062662	0.860072090533924	-0.454959529807397	-0.454423343888779	0.00695583957329612	1.04210369603788	-1.89483931382339	-0.724758094349674	-1.96880604332983	0.269844302650941	-0.212272858788551	0.241731399053669	-1.62520614553199	0.315934746720546	1.31336284667444	-0.484273817274882	0.980592428660948	-1.27186966194278	0.545086191495685
iPSCORE	725e0255-424c-44da-86c9-bc0bc14a21a8	693a95c0-adfe-4d90-a2b8-9b5f0b9e0e9f	693a95c0-adfe-4d90-a2b8-9b5f0b9e0e9f	UDID033	37960880	72.23067537	7.943683076	0	0	1	0	0	0	0	39.6907498602165	-1.95209772172286	-20.9825402769442	-15.1568460171305	-1.43002716399839	6.17115592176797	-0.179098747619362	-0.67382259005273	1.65740897408029	1.91365392900275	10.9345716021167	17.3042660261509	-11.7849433375327	-11.5792957755418	-2.27096019145774	-0.437915506669913	8.59426377740404	-3.57493478788969	2.61388371992543	10.9385322006611	1.19262470373533	1.42125654044449	-4.00694660996165	2.52463174945061	-1.68905485963786	2.43131012426652	-1.04991860904862	2.164379632314	-0.197134207677122	2.52024624920799	-1.08794555273917	-0.355102321234329	-0.576467864310913	-0.818594157568658	-0.809602620679159
iPSCORE	83dacb11-4180-4807-b099-05fd1561a722	6aaf5dd4-ba88-47ee-98fe-e7ff4094adc0	6aaf5dd4-ba88-47ee-98fe-e7ff4094adc0	UDID053	48521786	81.32222503	8.753503014	0	0	1	0	0	0	0	40.5694743435764	-3.3128645197958	-20.0053622160242	-13.8505577188231	-1.44493956318504	6.47682824090999	0.304897511788326	-1.19817030182079	1.14848409712511	1.90947799673172	5.53879691034461	9.01779189800047	-1.04801395657771	1.88389900434069	1.0343358130201	3.28791394503278	15.8478078039221	-1.04813503588373	-0.897755092811792	1.25176354202549	-0.433852729088286	0.0977430548244637	-0.793788692661307	0.764561193420669	0.744744750555684	-0.0960598320564342	-0.464726515213169	2.38554147523539	-1.49308377253001	0.695036041322847	-0.567691365620151	-0.979363992166534	-0.0404184244470875	-0.0504583466728622	-0.678268642311285
iPSCORE	555ff1f2-5c5f-4490-a1f9-79fe8c416a36	6b9f26bf-f68b-4ca3-9476-76b118d70de6	6b9f26bf-f68b-4ca3-9476-76b118d70de6	UDID041	58392052	78.43079055	10.28520114	0	0	1	0	0	0	0	41.7942865130945	-3.25741467899736	-20.3563375085209	-15.1005348016725	-0.531936244779906	5.88902384770385	-0.391100098355256	-1.10291211134525	0.89792690693429	1.45455156178722	8.86746853755231	15.1729449765388	-7.14609928424682	-6.08346303807171	-0.771874933097977	1.44256522180367	13.4256472010228	-3.27666693833765	0.780849721277741	7.39865092960508	0.477588739724262	1.84301798304597	-3.79182395986819	2.48142764088758	-4.82741738631398	1.88796546121837	0.859169742016911	-0.253701412725685	-0.500188217394879	4.01308310244887	-2.22443999247834	-1.63586100143665	0.333487537148097	0.0252729444307908	1.10963409877313
iPSCORE	7cf9e7b2-28a3-4b42-812b-929516fbce4a	6d187743-3d2d-4d1f-9315-9342cf568925	6d187743-3d2d-4d1f-9315-9342cf568925	UDID139	45884328	70.41259926	9.357286436	0	0	1	0	0	0	0	35.5295907311198	-1.85603631987107	-12.1756817778971	-7.10350959516546	-3.55638223188166	1.34176792328593	-1.09664715306194	0.307351882099419	-0.201487980704723	-0.721403187199648	-3.73835149924157	-5.03744935792652	3.27966233558492	-0.0294019853167438	-1.22753145630257	-1.56790375755098	-4.27368550664172	0.853390579320902	-1.60729410352248	-2.6784696856768	0.547918903688955	-0.0413359766212911	-1.3666520200856	-0.881676203939518	-3.06767355093009	-0.425099650634258	0.382924584844838	0.320135011734933	-1.03485558066846	-0.10786060620677	0.954753443655905	1.24229348950248	-0.324759509229795	-1.45413925789839	0.762479753837477
iPSCORE	4f2a904d-793c-4db7-b1da-39d1aaeb1d01	6dbd628f-f8a6-4510-aa38-726732341e24	6dbd628f-f8a6-4510-aa38-726732341e24	UDID093	41621638	76.56255143	2.988709863	0	0	1	0	0	0	0	47.3533980984195	-19.4838601880036	14.5305300165311	10.6177951064957	-6.63499264990758	-0.698389089731043	-1.26477788142181	1.15237662323781	-0.371155712407749	-1.4549598820508	-8.50337796613537	-13.3342928466039	-0.344040877492677	-4.95260002043633	-0.727495850155051	-2.36721426446325	2.72100962761723	0.084536982967343	0.939014075616451	0.628325130058831	0.44308016019278	-1.50296127755504	0.252663980254924	0.468126330847393	-0.284392191390758	0.804335971761779	0.411970543459883	0.949373169863144	-0.288748613396915	-0.088584703993137	-0.464425674540942	0.778186052275811	-0.285842747932179	1.51915302665946	0.456467856405318
iPSCORE	fabb1fba-dea1-44a5-a9c2-e40b46011c7a	70d8ecf9-191b-463b-8d7f-d76905e27d90	70d8ecf9-191b-463b-8d7f-d76905e27d90	UDID134	45151554	77.60489927	6.453585186	0	0	1	0	0	0	0	40.3302186664857	-1.59802822940351	-19.5497208178633	-13.3478809685739	-5.03944609814782	4.84245957077104	-0.927843497868433	0.0713887827596227	0.410214783201466	0.705406721195191	3.893266171224	5.52489913727143	-3.54251390162704	-4.98966369158505	-0.849587615574104	-2.48992068558639	-4.73332030335387	0.444279086476528	-0.946074243332244	-4.54841330513039	-0.1088585510811	0.513722782491702	1.4001795621278	-0.655451850970328	-0.406004728772623	-1.34717148025908	0.466780959794165	-0.059081334586859	-0.0337107615543945	0.0917616315043382	-1.16055240104726	0.852258414310167	-0.989611456046611	1.93517830502691	0.739645388701963
iPSCORE	6f354cf7-0cb9-4351-b619-d111936d0b25	72950eae-ea7a-4c47-950a-153b167c4da5	72950eae-ea7a-4c47-950a-153b167c4da5	UDID162	50108010	77.99272412	6.122885343	0	0	1	0	0	0	0	40.3348663358987	-3.65611828984828	-13.9601658300948	-9.14196114099391	-3.76709003368439	2.15536121827143	-0.786752920548026	0.0131669959788844	-0.848708075418855	-1.23457407869672	-4.32298410783851	-6.36868654756052	2.80266014271666	2.17193571679143	-0.270628633411487	-2.08154328038736	-7.80627002180509	1.42261550016781	-1.00699920950327	-3.41320006061325	-0.340113069091822	1.11051045285957	-1.14389630248768	0.334190926116339	-1.0968159543591	-1.10498923906555	-0.981613312643168	1.48087838292464	-2.09411282945446	0.767030904548542	-1.494181364385	-1.2546148873816	-0.0932403461787372	0.0391327511487098	0.344267239256859
iPSCORE	cd6dc660-550f-4a19-b9f7-f1bc9c893ca8	73fd62fe-8155-49c3-9738-2fa773807246	73fd62fe-8155-49c3-9738-2fa773807246	UDID278	43869746	76.20693313	4.362026623	0	0	1	0	0	0	0	46.4265419112363	-23.7267080705846	24.6567310465181	17.8206569969922	-4.67622214261315	-3.45499008666082	-1.09068556623579	1.25333797829371	-0.216070872894992	-2.02687827597193	-10.6457884838687	-15.7516075740522	-0.0471646034123123	-9.87791158700662	-1.29388949769683	-3.26219722485784	12.3824554751763	0.0321457023615305	-4.8405419314752	0.960289477786722	0.268310592487404	2.7248364826844	-8.46544959263881	0.827928837194568	-13.48473948635	5.94872630757688	1.42415541225251	2.08397762330535	-0.743809501389847	6.13333016007071	-5.61839624162837	1.12525671686165	-4.16202930386581	1.92480192600336	2.78113015836671
iPSCORE	a140d6d1-9fbf-4645-a083-b870bf2f0f67	742e5c02-d95d-4de0-8e09-6c23c48f17de	742e5c02-d95d-4de0-8e09-6c23c48f17de	UDID040	49187292	74.91894045	5.948955271	0	0	1	0	0	0	0	42.2020168325747	-4.4336182526382	-18.2039655057249	-12.8692455492112	-0.2300774061708	3.26009155011501	-0.211141209203061	-0.350133704047962	-0.122219678095195	0.278547511033132	3.56889382849795	6.60672752996183	-4.14944521090683	-2.43376267321014	-1.04174260797889	0.108312897417971	1.58656998810849	-1.70480396267803	1.63421006507401	5.36481089499862	-0.11290840834127	1.47702958843535	-1.16593782663795	3.19613080008019	-0.148003483442079	1.59509401747535	-0.153133386240996	0.973047590913442	-0.0695037129615291	5.79888729975488	-3.56966557626872	-1.9392850937247	-0.16795585477483	0.132242969455841	0.0698758914908702
iPSCORE	e0793a72-9694-4711-a2c6-d2ff9071d05f	78630dfe-722a-4b57-a261-723206dde649	78630dfe-722a-4b57-a261-723206dde649	UDID283	40405214	79.91729978	2.951158729	0	0	1	0	0	0	0	52.4225646299243	-29.2822204243383	37.5855089164638	22.4768041591325	-40.8390555212008	15.4168020869109	-3.39730303058749	4.59412800988772	0.149452420234803	3.71378041463421	10.4594038981346	12.2928632488072	3.63912563647806	16.2178824831107	2.54085682708609	3.99290098173972	-9.86064285411321	0.223838263398272	3.11549242595352	5.25893638621652	-0.660674374889135	-1.48424679832345	-1.18782546427784	0.411148762253124	1.78686244959792	1.45546402696682	1.20440392760898	-1.0362321989138	2.48011681592918	1.62100344561132	-0.88446360238504	0.436410209919473	-2.33369043616949	2.75003716753352	-1.54157467087362
iPSCORE	f0b9b314-5e83-4975-af42-54ee03bcc459	78f3ce72-4772-4653-9cbe-d12f7150c085	78f3ce72-4772-4653-9cbe-d12f7150c085	UDID073	47918038	82.66304643	8.232874643	0	0	1	0	0	0	0	39.5887621235167	-5.94668240891146	-11.1755028106157	-6.82969799604684	0.418807384690371	0.382893806149597	0.101858679831271	-1.8327429461147	0.129892400884281	0.834316456695458	-3.63168796477418	-4.0941056407722	7.83808714511941	9.37763685995402	2.67131920804538	4.39945013804499	9.23857513752897	1.34694113523883	-2.16500433516267	-7.79812526002928	-1.40696803856366	-2.0881879553529	4.12120321636887	-0.215324682817314	5.12404860863241	-2.86570010236192	0.204315091495891	0.284487833911037	-1.18518927454848	-2.01662928219565	0.00251529526123562	-1.90462132936282	1.6570752112186	-0.112165920494059	0.762490234463504
iPSCORE	c3c65323-ace2-4f32-8595-7434edac5d28	7a6350cf-6d20-4757-b249-411e65ac8ca3	7a6350cf-6d20-4757-b249-411e65ac8ca3	UDID154	37723756	75.03359422	7.12543576	0	0	1	0	0	0	0	42.1571119410064	-2.4986962551669	-21.5202948165472	-15.8043819141962	-2.45111848508307	7.08051176165998	0.4943750323142	-0.649739604731569	0.873761744632508	1.40131621132	10.4349013661496	14.9686585519908	-11.0022039732565	-9.00117159550963	-0.636181491543237	-0.383743315811459	5.73408465694796	-2.03401728206431	2.30722256005734	9.63386382456773	1.1847539255044	2.35742466536367	-5.53791114756106	1.15776330963557	-2.26471674887442	2.38181912967515	-1.46476902979245	2.83257843947713	-2.15400235840632	1.33094389043547	0.4886355806683	0.140090236805825	0.527748933237107	-1.67089832126009	-1.23590722965115
iPSCORE	42e4583a-b1bc-4cc3-85d7-68662433b345	7b1fc16d-3f5c-4f3c-8d3d-71ca479a03c6	7b1fc16d-3f5c-4f3c-8d3d-71ca479a03c6	UDID063	53137076	79.28300007	7.329315599	0	0	1	0	0	0	0	35.5006155038733	-1.54074386578194	-17.8651047794509	-11.7271493003657	-2.16305920485552	6.04192470145798	0.0369186297890487	-2.55228639831289	1.94421141552994	2.91249557578576	4.96543328186019	8.91860619514035	1.72836300386188	3.08306065744989	2.93388838323988	5.9731014666204	23.0366843286438	0.0263934164545653	-3.28823582095907	-2.76114709013378	-1.08191422928531	-0.360306032448033	1.44266978420183	-1.22431732552655	2.55031473735714	-1.92394755830522	-0.605017056479814	-0.0935364400054377	-2.27779063080813	-5.89140814328874	3.98196501902007	0.988777664947705	1.89127697124085	-1.46201289863084	-0.775897495371031
iPSCORE	c09c3de5-4244-404b-ae38-be65b86a48bd	7b8a8028-4b78-4aa2-8d0b-a85ea435e30c	7b8a8028-4b78-4aa2-8d0b-a85ea435e30c	UDID206	42395536	74.4439792	3.898764247	0	0	1	0	0	0	0	50.1335248340765	-17.1273303226598	-1.86737149750075	-2.82959682036658	20.6939668364123	-8.04548486543444	2.46683173979926	-0.310303882411284	-0.243174686906899	-0.459518527185733	0.69284252885146	-1.48144895207949	-2.92552252260081	-1.95720697835254	-0.880887689317432	-0.166479589416649	-2.21989798236297	-0.841782650441338	3.83010304038709	4.51752757360522	1.1619885542869	-2.15339194924375	2.17045717574134	-2.11639852823243	-1.43494091260683	-0.608388469773614	1.70824593789922	-3.92013948289956	3.60410905301849	-2.71519496943733	2.38246915666542	2.23871287708658	0.109881549481105	0.105068076866433	0.578957517530626
iPSCORE	fbabd331-fc4f-47de-b4d0-a9ee5434fa5b	7bb2ef93-de5f-4235-a8c7-b80aa23863f9	7bb2ef93-de5f-4235-a8c7-b80aa23863f9	UDID008	55593978	80.53810432	7.651810777	0	0	1	0	0	0	0	42.0128810089749	-8.80827649044407	-9.71685788719319	-5.92779789660902	-0.0680382923530524	2.46766290503047	0.393310669710742	-2.84682157756197	0.973688572702115	0.653886539595377	-4.79765355034443	-7.00923277844256	7.85546756891938	8.11348861754552	3.64547488705869	5.05164466237977	19.9290413607002	1.5340789511438	-3.39901285376764	-6.03624022012641	-1.63357901096878	-1.2922260084591	2.67327792348006	-1.67077579770744	5.00936939882776	-2.73543521259639	-1.40629791998865	0.595071947367802	-2.88766485913369	-6.29540026533059	3.54342028355328	0.00126969905768385	1.42889042081048	-0.396347970904816	0.0388927952691138
iPSCORE	b9e30469-13ad-4792-878a-889cd6480f91	7c21ef92-6593-40a2-bd7d-249884939aea	7c21ef92-6593-40a2-bd7d-249884939aea	UDID055	50943244	81.26730995	7.780171989	0	0	1	0	0	0	0	41.0127582445164	-7.5720730630144	-9.80531103983951	-5.88374721128602	-0.453877887312248	2.22328459200596	0.383226253730361	-1.88897292582064	0.553774799976051	0.150362740135261	-4.08384541545288	-6.0195851357203	5.17717722791345	4.60109038587361	2.16932145279263	2.79330298841452	11.6684617969395	1.32151336808325	-2.27007604283346	-2.1632116565168	-0.704674909708009	-0.099816812641252	-1.09501661415295	-3.34566724757817	-0.793009010904589	-0.307562585233325	-0.167729439920945	-0.92821893488394	-2.88306002019329	-6.39411211237767	5.39573182085885	2.17581933305229	1.63398674553301	-2.05483138326423	0.00399423251990439
iPSCORE	f0173728-58cb-4d7d-b28d-02355b49b9ed	7dece089-d77c-429a-b43d-028132d797c7	7dece089-d77c-429a-b43d-028132d797c7	UDID002	43909710	83.36389833	7.772850242	0	0	1	0	0	0	0	41.1958232800906	-4.04495793870068	-17.4908909662751	-11.9792967236807	-3.52788727838271	5.4181284781429	-0.663688936903277	-0.719917999079319	0.555626677066643	1.03689766479904	1.97730625108174	4.44670148716185	4.15942436134155	5.2766990670393	1.60707784570766	3.39446572423633	12.6741975708469	0.10334991934986	-2.7159081956062	-5.50604522175986	-1.09643949683214	0.235065087711921	1.82482930309809	1.72775116525146	2.48370217252711	-1.88011292278509	-0.476433398765815	2.51611494650291	-1.50284923482147	1.79898892043936	-4.43262401779039	-2.51689143246594	-0.855992566358145	1.05034109403931	0.734032950047225
iPSCORE	aaf0f250-d1af-444f-941b-9d165e1bc2b6	7eed502e-12cb-4d0d-92f3-d0ee62fdd151	7eed502e-12cb-4d0d-92f3-d0ee62fdd151	UDID250	44124202	77.88200226	4.231863502	0	0	1	0	0	0	0	39.9642457265011	-7.2388225049386	-3.81506153369548	-1.60954783675744	-14.8122153293881	7.60957387153771	-1.5865919599676	1.58639977041996	0.174788043367409	-0.707379674225348	-3.73262441428431	-7.46238007609833	6.75635828922853	7.08262791026898	1.52089368026989	-0.923698030493494	-3.559292942931	0.966754477450545	-2.52588051144317	-2.27505444513055	-0.504816568670748	1.67901285711071	-3.4119472241781	-1.38372366661337	-8.57365454418603	3.54381914538146	1.33510105293963	-1.81213192906767	2.73927292335215	7.88351399021547	-5.06495618425742	0.795777064391066	-3.6378488595667	0.595493620865857	1.29860478338976
iPSCORE	f0b9b314-5e83-4975-af42-54ee03bcc459	7f30ad11-d413-4c68-9f3e-7bd0bfe3fd4f	7f30ad11-d413-4c68-9f3e-7bd0bfe3fd4f	UDID054	47923550	85.33235539	4.696317364	0	0	1	0	0	0	0	49.2546445597628	-19.7632959444893	3.09283035812053	1.00609715552273	23.1715540101405	-9.16213796360231	3.66545904088789	-1.75046144499704	-0.168814993434907	-0.211354181348226	-1.3914588738803	-1.6058392734494	2.9279672645775	8.6709175669835	2.22312706301162	5.78869953952089	7.31770339911115	-0.952791145483363	2.28052047211707	5.28624103345017	-0.50132253788612	-1.13525401512413	0.436519896829495	0.331654927660313	2.15308200757611	1.43391649288729	1.53606418372914	-2.92091124797658	2.60218301171649	1.93445241765187	0.656275217735819	0.463594587201755	0.648516845394942	0.0130600409982251	-1.50418044683114
iPSCORE	8dcd5c7f-fa13-4302-af2b-915c878e23e8	7f8f590b-beb3-423f-9467-ae7552d2004d	7f8f590b-beb3-423f-9467-ae7552d2004d	UDID032	45936716	76.71599337	4.511162705	0	0	1	0	0	0	0	49.0950205514879	-15.8125958180169	-6.72491433865649	-6.09124646119103	19.6275573389984	-4.83087477123364	2.84877708922024	0.383162291644657	-0.683963421989019	0.326271204400887	3.33280237835106	3.71111849432227	-3.36700128538045	0.778914692073636	-0.385425832094621	1.30687495833402	-2.55083545093712	-3.90166162826865	10.0297332076434	16.7721449893276	1.1911904980568	-4.07346501671794	2.62364973995928	1.61813651407695	2.99735139000816	2.01427896367929	2.32895596299388	-4.78429438449386	5.62178480203744	0.567907938827291	1.65172526906959	0.82541306321765	-0.101757575335247	0.266891413313435	1.47794202542308
iPSCORE	f0173728-58cb-4d7d-b28d-02355b49b9ed	7fdfdb6b-fca8-44fc-a804-e57c80da80ca	7fdfdb6b-fca8-44fc-a804-e57c80da80ca	UDID010	37790128	72.47548354	7.56105404	0	0	1	0	0	0	0	37.8335130920388	-1.94476902958	-13.7798717107374	-9.42246298710103	-5.23747833875603	2.09893878537566	-1.58279369454597	0.0561719138997225	-0.304270679955355	0.148289273464897	1.09760459562885	1.64170195856447	0.480038970405662	-1.96949769807329	-1.12286541837109	-1.81156510593908	-7.75763383365588	1.25769408269337	-2.58863655375568	-12.7812521595821	-0.860736056009811	-1.88283263206	7.99773764836073	-2.22966540944201	4.24573109774885	-3.05499553543492	2.96310924327737	-4.98091472846707	4.0150159280893	0.18977199032687	0.224624060175571	-0.609720880670351	0.100568756701706	1.98691046190403	1.9182490618347
iPSCORE	214ad59b-7245-4ca7-bf42-84cc2e09bbbe	8034d299-b3de-4de9-998e-c1602be382de	8034d299-b3de-4de9-998e-c1602be382de	UDID005	39249460	76.63061352	7.109417556	0	0	1	0	0	0	0	36.5484221640701	-2.77208667152971	-10.5212992592038	-6.35002426445553	-3.17492016070309	0.791116473500546	-0.793135854312952	-0.0130156377438733	-0.266419344254917	-0.540548697090509	-3.77855668712828	-4.37029052624639	1.7898828449188	-2.64947240684046	-0.909883841982362	-2.11053154439092	-6.09200693530362	1.12558792723719	-1.38576300967664	-4.52670402033266	0.0751591925600504	0.253728073603053	0.407540745302912	-1.18583333481363	-0.510833278080109	-1.31392063241968	-0.575320257406609	-0.25831156211173	-1.37032004458466	-3.80064074441111	2.9370732632083	1.22557266959229	1.4481909092338	-0.351670484068719	-0.175106511556533
iPSCORE	cd6dc660-550f-4a19-b9f7-f1bc9c893ca8	80f74c27-6f3e-45a7-9f2f-2943581bb363	80f74c27-6f3e-45a7-9f2f-2943581bb363	UDID018	44247628	77.06604295	2.236689388	0	0	1	0	0	0	0	56.6707042945995	-32.4145125869052	19.0309828799244	10.8822734364262	41.6613298818374	-21.358657259619	4.9614374312069	-1.90522150474018	-0.403574352633842	-0.664379765389892	1.57190747795398	1.9568366999815	-0.505475931903579	3.70638716860087	0.655284097204368	3.1112033755607	-3.80057860202031	-1.19818160811826	4.98262648831348	4.64681208710046	0.379756582431894	-2.23396786367196	1.72191419225172	-0.731335137015139	0.775041269311934	0.575434749906716	2.02932620834316	-1.95732641513394	3.30853069055512	1.44631214866811	-0.491789444232148	1.12349014613173	-1.40331949084609	0.919329711137566	0.339368765843283
iPSCORE	ce67e934-e752-4d69-b212-007c655a7590	816af377-f3c4-4d24-af6c-d0eabe4d9570	816af377-f3c4-4d24-af6c-d0eabe4d9570	UDID088	50408864	75.87702433	5.597344943	0	0	1	0	0	0	0	43.4031496344089	-11.1982219304601	-3.52249069620069	-2.15288841119005	5.09591242163724	-3.71649394303872	0.325199239429736	-1.07306895255977	-0.552623163418538	-0.989148212626669	-6.68971874094742	-9.6948318817165	-0.994689771116118	-5.96647933405527	-0.748465058151348	-2.5948986974622	-1.67645457855566	1.00384921214577	0.292763861916213	-2.01355715979152	0.46635012743869	-0.839483273950256	1.15989588608297	-1.76465189251731	0.482226224533818	-1.41536716800645	-0.149344775672285	0.0127688128284232	-1.83994480968219	-4.71968934132995	4.36036879200251	2.34989022746543	2.37040905555244	-1.69527308923577	0.228269254128839
iPSCORE	57da1c1f-303e-44db-9111-0f071ecda263	816bf5d1-86f9-49a2-b525-072c13db57f2	816bf5d1-86f9-49a2-b525-072c13db57f2	UDID092	47851906	78.50968779	4.352767056	0	0	1	0	0	0	0	39.1367765145678	-5.28985574094402	-8.59661445886961	-4.83442118101632	-1.5815136214747	-0.122421634567699	-0.25798445260086	-0.136675794535766	-0.666567787101792	-1.67359811797611	-6.29194454054726	-8.85429729263201	3.77107207248567	2.46467200190808	-0.516877810608148	-1.52789443371389	-5.71144894122247	1.30501281151144	-1.8603980076498	-4.85202094621666	-0.0679423276501737	1.34522199115537	-0.398182396675223	0.235140603982926	-1.17009608565187	0.0214979718720924	-0.48707615287272	0.356024237558668	0.127715547980492	2.46329949106494	-0.692459888817934	-1.13997625272843	0.133485960651524	-0.806585104800521	-0.00352901454861135
iPSCORE	7df93333-f21c-4775-8679-c2518e05bce4	82d8d9be-82ee-4e8b-ba86-6a1a7f8dcf9b	82d8d9be-82ee-4e8b-ba86-6a1a7f8dcf9b	UDID015	40230552	74.57557132	6.312505978	0	0	1	0	0	0	0	41.6705693601196	-4.67498687492636	-15.702666849163	-10.7147763170758	-5.02944711777866	5.66183477744512	-0.526453065003328	0.0575353125885567	0.399314608116368	0.12814675155215	1.41132166519139	0.57468891474396	-0.700959961781577	0.0316455088530956	0.176699486563644	-0.84024447394407	-0.640862456231065	0.194470920314631	-1.46891582935945	-1.62039693165352	-0.412125848119267	0.808630133536397	-0.282654149221299	-0.968563686264447	-2.59055024855144	0.997783250212767	1.66146373094551	-1.71217702150503	1.74283129008493	2.33980872959752	-1.05131449311312	0.33085298022656	-1.20074739960818	2.01735970987957	-0.0605820734941408
iPSCORE	50d9dcf3-cbdd-436f-bbf8-fcbb920d23e0	87353403-57d4-45e6-87cc-379770e2d35c	87353403-57d4-45e6-87cc-379770e2d35c	UDID175	50723650	75.98503262	6.748327457	0	0	1	0	0	0	0	39.6722976779322	-2.4727503328788	-16.7581675334588	-11.4165386100568	-3.43373211675582	3.78190671240466	-0.50350821657913	-0.0995214219091234	-0.12189943456665	-0.120175407288701	-0.52044009769824	-1.63944486612687	-0.74519919153216	-1.63639605909922	-0.851775590699514	-2.23764669936646	-6.21304423001806	1.21381897909962	-0.49185033651673	-1.17620318349969	0.723800341965877	1.23570377833006	-1.56521367720569	-0.769904490139183	-1.15943913791419	-0.881889409743114	-1.22233809651691	1.91322176906469	-1.97021887706913	-2.2763667829947	0.304093784496252	0.859491139631341	0.482439974456408	-0.358797247798338	-0.490576126131527
iPSCORE	66d88423-3567-4c3e-82dc-eff030aea3ca	8a9bb977-f26d-406f-a78e-d7613c812c4f	8a9bb977-f26d-406f-a78e-d7613c812c4f	UDID061	38573802	77.79765137	2.606779596	0	0	1	0	0	0	0	58.9313774220071	-29.5731411523702	17.7227403144791	9.33264536243033	21.3546939280503	-12.1261313298111	1.79906759863756	0.0364669458840677	-0.572483510161741	-1.03001898405523	-1.22717950045931	-3.58932569123967	-5.63208419563677	-9.55098333418336	-1.0032273074779	-1.69314648511152	-3.47776241371987	-0.0258803232690468	1.18612465227534	-10.3437052283933	0.263775688364037	-3.67368186650313	10.0248860282343	-6.11439257803422	4.42262021776536	-0.766645285238193	5.48768346310962	-9.47461335599993	9.33087950547753	-1.21215185388463	3.7782621348642	4.02956906954147	0.343530256970956	1.42210036991027	-0.558544055230331
iPSCORE	28114ea7-018a-47bb-af34-32bcfbf1a233	8c43477f-b31c-4a03-8ec7-941cc32b045f	8c43477f-b31c-4a03-8ec7-941cc32b045f	UDID038	43401946	75.29147656	7.361817371	0	0	1	0	0	0	0	38.7827633620457	-1.91041809450173	-17.7180712858164	-11.8155603897082	-3.35791699179806	3.82731840319215	-0.47588173283293	0.046497083439321	0.0765046642592978	0.052499559100297	0.9900957952644	1.2877231375121	-1.56791301362563	-3.35710212012003	-1.94604952706099	-1.97800803850271	-3.77352720440762	0.268543151043672	-0.293948695687662	-2.16692233581712	0.503331746526483	-0.254116264328408	-0.0830514477180004	-1.33001733278494	-0.955205553670656	-1.22585993406997	-0.325333699854236	-0.169136773959543	0.228756538219152	-2.97893486919094	1.18868595895282	1.71434289374405	0.328190670934592	-0.528306450052981	0.105907714371622
iPSCORE	f8d3cea0-5f3f-4298-b4a9-145571ba840e	8c8b7697-458d-4aad-b069-2ff352ce6609	8c8b7697-458d-4aad-b069-2ff352ce6609	UDID116	39133640	75.84771567	7.440999611	0	0	1	0	0	0	0	40.6000060334693	-6.13429742356436	-12.1580325228534	-8.10147083582783	-0.213198042232091	1.67304272463803	0.0712334553878227	-0.486626577557786	-0.497725724894893	-1.06363013441645	-3.84732502207383	-6.25323589077066	-0.563348085146642	-0.596961541383421	-0.450797831655812	-1.1365613400212	-3.13116540267838	0.375225151307935	0.979317056365451	2.27912990677796	0.292024666785931	-0.379602883015109	-1.12263784443778	-1.05553043216787	1.30565642397728	-0.280084004056837	-1.39108672461146	0.0397697460760467	-0.591306476737448	-3.97967385298959	4.1605127058012	0.843168296511073	1.18693962364137	-1.47133255948727	-1.6640017221295
iPSCORE	b9e30469-13ad-4792-878a-889cd6480f91	8d7f0252-aa3a-4c37-8894-dcbcd61bb1a8	8d7f0252-aa3a-4c37-8894-dcbcd61bb1a8	UDID059	47092860	82.67107158	7.545844529	0	0	1	0	0	0	0	39.4165273155749	-5.75259332054715	-12.5858545898374	-8.15147360014217	0.623914565217753	3.5082374405048	1.03073720525094	-1.70154504540802	0.495497145512652	0.67512068844271	-1.40866265164129	-1.58278629566952	5.03980713142769	8.33341421162679	2.90828531457009	5.17848750506264	16.3370624533038	-0.0562910621714826	-2.02353398612624	1.02813719425156	-1.26975110057278	-0.349259347136455	0.437215645648871	-1.05480982047431	3.06361630694646	0.297772238878402	-0.0399200303100286	-1.39135608631341	-0.450046373092951	-4.23351202976879	4.08616270416368	0.490558146997054	1.88375481579468	-1.1218967611508	-1.45968084989669
iPSCORE	6e83c1cd-0c82-4ae2-9685-23cf0e12c119	8ebe6a40-3c57-411d-83cd-4b554610c163	8ebe6a40-3c57-411d-83cd-4b554610c163	UDID202	38250828	74.0217702	8.507449826	0	0	1	0	0	0	0	43.1522801471155	-3.44304423344751	-17.9173577499879	-14.3071786103014	-4.8326271265409	5.71859786414131	-1.50826353165343	1.17635147294426	-0.00171614962300055	1.98116196737914	9.05721256755745	14.4392206483055	-6.74487361356945	-10.1488204534727	-2.31179867121227	-2.26460090907936	-3.61159091364159	-0.424127635768378	-1.13661696153712	-10.1144073416976	-0.0609126772313876	-0.734003611484673	7.29299900242579	-3.70661701348148	-0.49685325023772	-3.19237679336248	4.74367606761008	-7.46564830218082	5.56475704810506	1.31634388280231	-0.586128342126443	1.32639953618604	-1.49826370120072	2.08257534259436	4.18404521864472
iPSCORE	1593705e-30b4-4a9b-82a3-d5022a6dd6c1	8ef40bc2-f690-403a-97f4-482b28d81b9f	8ef40bc2-f690-403a-97f4-482b28d81b9f	UDID153	36891104	77.30597599	5.124574206	0	0	1	0	0	0	0	42.6085587402546	-6.71995381452779	-12.9488577348915	-8.44842345463024	-2.22165117442924	3.2019594219932	-0.145558203002946	0.580581872946159	-0.334435816557737	-0.881810603590636	-2.57932856811662	-5.03553090641144	0.481952314966076	2.26845409056898	-0.290186487743135	-1.09233075684828	-4.82232544837175	0.652168782668396	0.667367081531625	3.6561386099849	1.47239400194492	-0.653368195241044	-1.91917298609203	-0.613470346346707	-2.11187622543082	0.598686702611738	0.214304613547147	0.0427265114238621	-0.754530792466333	-0.0418828811757251	1.21749626088756	1.36194896375187	-0.0423376224940716	-0.337305193084206	-0.105383406284954
iPSCORE	24a05048-39b7-4e5a-b4cc-2543d4186748	8f8e6375-660e-4f24-8e22-b24a17c5842e	8f8e6375-660e-4f24-8e22-b24a17c5842e	UDID105	82102846	83.65902931	7.862106266	0	0	1	0	0	0	0	41.3613328760208	-1.58341880630784	-22.3945638713718	-16.2547590260159	-4.3368075456241	7.41310422380593	-0.939841658298445	0.28327905532432	1.06709953784523	0.989073681555722	8.4623723470959	13.5203369520969	-9.41553632197118	-9.8746442135375	-2.82759887340348	-1.23367621734375	5.2178768612693	-3.50705020251043	1.94925799561837	8.0446740223421	1.13165492784913	0.691998083058083	-2.42592237761077	4.20571041660923	-0.704871823600734	1.71422731137471	-1.4275365339296	3.44718463561441	0.0986781074639172	5.67699985266965	-5.63328442713562	-1.99442185837711	-2.72775343133598	1.03756406983972	0.292466639317077
iPSCORE	f772212a-cd98-40f9-bdcd-e75740c1f6be	936f69d3-5ca1-4464-b090-325880a42c11	936f69d3-5ca1-4464-b090-325880a42c11	UDID048	54752212	81.13770088	7.119200956	0	0	1	0	0	0	0	39.3725189722577	-3.76550189809924	-17.5230248657236	-12.5527522753808	-0.646645337975329	8.377588795435	1.2793355881942	-1.40675979963905	1.50388550701893	1.46992920408705	7.27176524388561	9.96664719457122	0.380773764721177	1.96262450246282	1.7215241193176	5.51410585151398	21.4503921720668	-1.70041069205102	-0.115453891921769	5.80552734880331	0.204811438948037	0.707484898286583	-4.49065632485345	-2.22431930774661	-3.27943754224566	2.14730699979205	-1.57034882357848	-0.0499588139983292	-1.49504669855314	-3.01946663674233	4.44532643598881	1.21022472581327	1.1229124137161	-3.40405664057978	-1.43962569257388
iPSCORE	c99ef20e-a237-47af-95bc-15550378bbd5	95e5fb7b-ee36-4e8a-a154-2a0bb84a55e6	95e5fb7b-ee36-4e8a-a154-2a0bb84a55e6	UDID096	39877860	74.10757247	4.010410789	0	0	1	0	0	0	0	41.5378716301769	-4.81444236771269	-12.6608499134365	-8.44261277814082	-1.38088921127746	1.11983926337178	-0.0120004485235605	-0.243053852329827	-0.613034302132178	-0.983688000812897	-4.46197591515389	-7.58441642394824	2.13721509680945	1.39862327206509	-0.246908202205452	-1.83391270144085	-7.37724543124033	1.50281094694396	-0.26470296805158	-2.81470317555477	0.0976010698606972	0.61098830197144	0.453301925960548	1.37711395114623	-0.313670927747053	-0.845175236337411	-1.15674381260787	1.26969429506269	-0.986818092139539	1.29298787981118	-0.884061223805767	-1.60958762706416	0.530863331474281	-0.388292070077127	-0.495258197592793
iPSCORE	b48d5663-b599-4d02-a70b-6bd12546041f	9a109d5e-863d-49ee-95ed-2b4b01ffa98d	9a109d5e-863d-49ee-95ed-2b4b01ffa98d	UDID075	82787580	89.12987552	3.698941315	0	0	1	0	0	0	0	55.3386460829344	-26.741114679318	10.9057514346609	5.06348535129428	39.8230050807933	-20.5291405063119	4.82882632414965	-1.77019940897396	-0.583930430941029	-0.429840629848781	1.33372307704305	3.52904918486439	-2.32077355221322	2.83608600030078	-0.978492540862973	1.48455736952929	-12.4106308579396	0.366162867570281	4.02364680604885	1.49562907276383	-0.00728139355793184	-1.86495186905974	5.08446106757921	4.08598225160798	9.3363453278851	-2.10825806967587	-1.65635805435462	3.62246062374672	0.702701052721816	3.55517057010298	-4.75441149047161	-2.67719929264971	-0.87105839978238	3.8025535282566	-2.83121087605444
iPSCORE	eb1309e6-5567-437b-82d7-549c1c8d5493	9acb00bc-e803-4378-9b05-17dc7695493e	9acb00bc-e803-4378-9b05-17dc7695493e	UDID058	93728986	79.65220706	10.02225928	0	0	1	0	0	0	0	38.8976232697854	-3.13918646255171	-15.899597938406	-10.6495862902677	-2.29413581830944	4.9639670737573	0.44949774625341	-0.872887673374731	0.76589839932861	1.00345121790198	2.36185486592072	3.26211847260994	-0.0181800838652697	1.60330674213154	1.11790958613974	1.96835500144424	7.79736455107918	-0.559963937475577	-0.458578058241022	3.93451191452384	-0.229990055543743	0.889907759218712	-3.18890589018623	-1.2962006027015	-2.66116509411114	1.8090774804655	-0.0935019513607076	-0.394135628407375	-1.30845957138752	-2.10943853215098	3.29049206791738	1.62938029009369	0.758755202094815	-1.13528855429638	-0.904861071124102
iPSCORE	8c9ce6f6-06f6-4d70-885a-3c07d3ef8f91	9b693c80-60c4-44c5-803b-f732217be875	9b693c80-60c4-44c5-803b-f732217be875	UDID186	43653728	79.74905144	3.790178012	0	0	1	0	0	0	0	40.2365856979116	-5.20198297154907	-13.8635656678691	-9.03646996781883	-1.12570845252464	2.52489185044701	0.267496263582139	-0.231587412393571	-0.024082408277846	-0.586001280216623	-2.75833541407144	-5.2292180793701	-0.764331423277436	-1.82507165139322	-0.404571838825151	-1.70145556532218	-4.02894805360368	1.20198513439176	0.0403122256376271	0.898672221418358	0.438324287535324	0.0521400016785733	-2.00941076213868	-2.20847365124167	-1.06165014026048	0.440474508406455	-0.722865988081477	-0.0390710046464395	-1.44154860138041	-4.19303207704592	4.16821630990287	1.72019569951449	1.70897441369786	-0.968273132516226	-1.30953202718876
iPSCORE	1a8bce86-bd08-4d39-9e63-9448e6326f29	9d77cfd9-f107-4ede-ad68-77721058e7dd	9d77cfd9-f107-4ede-ad68-77721058e7dd	UDID101	79801597	82.59859261	11.89658773	0	0	1	0	0	0	0	39.036659901842	-1.46887035616732	-15.5624166091539	-10.0443119098634	-5.41960279316106	2.19201972453366	-1.16309258915694	0.650372259840808	-0.557423857423568	-0.49525898310766	-1.92788055235258	-2.58149079061046	0.99287561698386	-0.614532473703215	-1.51721343448361	-2.74176225273579	-10.2462411063064	0.985195156869579	0.368647383741974	-5.84771614146635	0.0952398964988056	-1.31181481850742	4.78721611459861	3.09657397598107	7.29789383738001	-3.0659471176131	-2.20951302574328	3.86731820069349	-0.0214845122897959	0.99454308353646	-4.08380510461126	-3.51007301884447	-1.72334205460304	2.61389770206928	0.241121040106574
iPSCORE	74809453-1b01-40bb-9071-47a93de70c78	9e2d05d4-5b73-444b-9ea4-acd33f69d818	9e2d05d4-5b73-444b-9ea4-acd33f69d818	UDID131	43002114	79.45893079	3.483870584	0	0	1	0	0	0	0	51.2522068197671	-27.5417404102224	30.3737409769382	20.4090910250064	-3.83406676533608	-4.25619101082445	-0.432437262634797	1.01229134543579	-0.678876938853866	-1.60158361019231	-8.51665729045511	-11.5093284093447	-4.94557362247215	-15.7699609957782	-1.82340953583851	-4.41158876568547	10.1926622540869	-1.06355329808184	-0.649322083362441	0.384646283112102	0.583330699762812	-0.498115939765553	-1.5706707202393	-0.0817553660961358	-3.43211364516863	0.95796673086879	0.883682098479503	1.63046084308156	-2.26215444335021	-1.04309206308184	0.824710921984609	-0.0271426883035961	-0.614969184645162	-0.0472438120614946	0.37037888989655
iPSCORE	b2928637-66bc-4fb4-806a-7ddcb26af360	9e3dacfa-7837-4292-9ebb-90af9e38c215	9e3dacfa-7837-4292-9ebb-90af9e38c215	UDID132	43068348	80.2457062	2.013789802	0	0	1	0	0	0	0	56.4425583312829	-34.5242104487034	40.1404901730944	24.4159666671668	12.2080104130568	-13.6225498428838	1.41212072132076	-0.607557471013517	-0.605242499728292	-1.87781523997588	2.98669368197101	6.36670921265142	-6.12587380537512	-13.7641521963435	-2.33894339281108	-4.96598094215289	2.07454184765063	2.40030708739365	-11.4801159433295	-21.1872890356728	-0.690235293944357	7.04436547656757	-5.77317095993761	0.994721770523236	-1.6962983309071	0.0776739342513948	-1.84320474658303	4.41410187707324	-3.96022824411903	2.05616656341524	-0.538053061585064	-2.27214059139783	1.91879302612698	-2.53403480181454	-3.17791458285869
iPSCORE	1c858ef3-c305-4c6e-a3ac-594e9b9b98b2	9e832763-ba93-4b80-9238-bd31ac210153	9e832763-ba93-4b80-9238-bd31ac210153	UDID274	37193176	75.92451368	2.30775667	0	0	1	0	0	0	0	48.8024326327512	-26.6658573476614	37.7702662776253	19.7653904991848	-42.5238497642028	15.8358120820595	-2.85591939846283	3.94746437217697	-0.8798951837904	5.24306076257129	16.0868006945847	20.3294599256994	4.88780489212991	19.3633199110838	2.70256323926187	5.15111886617608	-14.5834264585373	-0.843621462533364	3.0865484243792	0.191715954245032	-0.239901797062714	-0.30335007783861	2.63907383563263	-2.34371223490766	0.984277373257157	-0.127563091704264	1.83720883336483	-2.65908596797075	5.64797368587929	-1.94473204358719	3.2310984630886	2.2159320543017	0.69069114406573	-1.60007616403982	-1.1256052322497
iPSCORE	76db32e7-8830-4346-b3ee-ad0395cba242	9f376ce7-d59a-4855-8022-801ff74f5d52	9f376ce7-d59a-4855-8022-801ff74f5d52	UDID254	42780242	70.61297596	8.334772861	0	0	1	0	0	0	0	37.5984494566256	-3.61367862916907	-11.2848867477392	-7.53276854610673	-1.36899924766674	2.70964841876686	0.215640969819863	-0.636223152612743	0.0324779864616235	-0.529490958426517	-1.25113276015744	-1.9278563046811	2.19649466056701	1.70239307101268	0.422667685931206	-0.509361622950515	-0.627578650007147	0.343365142950435	-1.47556168364609	1.86191904937663	-0.0522208796647116	1.75269226868372	-3.54322823661863	-1.45928652061988	-3.87175609064682	1.27382102769996	0.0564354505196338	-0.70639168898408	-1.50865235268533	-1.32006778363213	3.54451775059328	0.997521254053528	1.35873964153805	-2.31557632489561	-0.0820900036671367
iPSCORE	e932e556-59a6-4f70-9b4c-ef5f69dac3ce	a5e7b56f-dd4b-42bd-9c13-afe3436ac9c0	a5e7b56f-dd4b-42bd-9c13-afe3436ac9c0	UDID020	56111866	80.77470102	8.305223712	0	0	1	0	0	0	0	34.44689524754	-2.40387322041473	-9.36821688040853	-4.94797753783127	-8.21640952720656	4.30764103190909	-1.81956851892443	0.421311283381407	0.83527631422701	0.691071635700601	-3.32553879506339	-3.21595125638874	10.8622885666891	11.3988009949418	2.48494925980646	4.81040497529984	11.2167540028069	-0.25660905022441	-3.73866224212906	-1.73705758891208	-1.63887763561386	0.252449280536724	-0.781485801110422	1.33413038284287	-4.33102872744375	3.70497093470682	2.19723289806578	-1.3151952651884	3.31223005573383	10.8592352259705	-8.04474829881871	-1.41161801121745	-5.24874236850983	3.99387347984889	0.1031198279187
iPSCORE	b86c786d-f8d8-4e6b-9504-95f8f4c807e0	a6db380d-f640-47db-850a-c54ee8b270c0	a6db380d-f640-47db-850a-c54ee8b270c0	UDID136	41745276	73.67028547	6.470993269	0	0	1	0	0	0	0	37.8183548860048	-1.23001183432068	-15.6721359745876	-10.7317305409176	-3.70342891014506	3.20061516237652	-0.425504641262129	-0.584585228816674	0.184814224893024	0.218082090562855	0.587361938179709	1.62112562041652	-0.345301782552275	-2.97675087201586	-0.735581817270669	-2.85137548103289	-5.88128516977189	1.70985991933128	-2.25820903777578	-3.56562100905419	0.339259984038911	-0.133396558527593	-0.483426029376287	-2.00966980496477	-0.358966973739503	-2.19318879996035	-0.0400863140403741	1.58030495893343	-3.82100132129056	-4.97824100931883	5.44510480567733	2.39286815170858	3.03495119460489	-2.18450548565584	0.792299311098653
iPSCORE	d6172ad1-6cf8-41af-a88e-26c43ebe2464	a82b44f8-ed92-4213-968b-8662a41c0b2a	a82b44f8-ed92-4213-968b-8662a41c0b2a	UDID227	39339752	73.93574316	3.94597302	0	0	1	0	0	0	0	42.4552353769238	-8.86096859508182	-9.39397330196418	-5.05909655483306	-3.50435315495099	3.66896864991356	-0.069543793424143	0.806462524105998	-0.395191167361186	-1.46043271670304	-6.27955726416367	-10.9395934036099	2.97309445431124	7.14075106991976	1.40964822538634	1.1670822449803	-1.05625517588628	-0.517711292888197	1.57976944972489	7.20651697525818	-0.90283999605092	0.280735555759413	-3.20171266063984	0.121692405077125	-1.9292495377871	4.14262771019967	1.07967562656163	-1.75991768256968	1.55166278733152	5.1437425076162	-2.53234321288613	-0.32583734305197	-2.28278238122142	1.98586659022426	-1.13420382467849
iPSCORE	36e99817-83e7-4dba-8e15-61f1184ab62d	aa37223f-e929-49da-b377-6008bb0ae6cd	aa37223f-e929-49da-b377-6008bb0ae6cd	UDID077	46323882	80.36577763	1.983253476	0	0	1	0	0	0	0	54.4187454867974	-29.4607313003459	18.3703373811292	8.98578798200886	42.2892359722081	-22.9486715504816	4.85452363165684	-2.95528881616146	-0.284230168642357	-0.696131154266944	7.76258617968544	12.8133678458864	-0.885545030077763	2.53772593421482	-0.521572291724684	0.417898133577874	-12.2362739803102	2.0187708818358	-3.57196725077793	-8.3710225498223	-0.531956387680158	5.11921071999773	-5.16104545156689	3.13351683783697	1.24240447217791	-2.6286432719251	-5.61124629997811	8.530537535964	-6.02848908462781	2.97599473246392	-3.89149973528179	-4.48989188977207	2.37372183507359	-1.98088398183793	-1.97609608138168
iPSCORE	eb1309e6-5567-437b-82d7-549c1c8d5493	aa8e0893-5b1e-4aaf-a002-1e9a432ed926	aa8e0893-5b1e-4aaf-a002-1e9a432ed926	UDID060	55557610	90.05433459	2.974760793	0	0	1	0	0	0	0	53.549543359443	-27.5308804146556	15.5978914661578	6.93206218299465	53.0347635333042	-24.6111618146624	6.35547100707159	-3.88088178885543	1.98895655704768	3.07968020340935	13.80120570754	19.7712444044079	11.5562569731627	22.3789440994615	6.05266212980055	8.7470895896735	5.83634197986635	2.10445483522831	-5.56725088262487	-8.56975100319516	-2.20327277681375	3.04401735673432	-4.06054138605545	-2.48107795003451	-5.3425139477402	-3.23406856225687	-2.47960247141625	5.10460369703946	-6.64789182420198	-2.16859902570309	-2.06500775077831	-0.218222597329675	-1.61101425350599	-0.474994538208073	0.431202368122333
iPSCORE	eb1309e6-5567-437b-82d7-549c1c8d5493	aac5e98c-11a7-4e8d-9b63-bcad11be78eb	aac5e98c-11a7-4e8d-9b63-bcad11be78eb	UDID004	55365278	83.49388582	7.976949018	0	0	1	0	0	0	0	36.6253477964188	-2.21956465642199	-12.7910414389582	-7.76614735127546	-6.57116715550574	4.29097610096512	-1.00879815615691	-0.318880385095918	0.523817465581359	0.295717343569372	-1.588414724301	-1.54219522564644	6.57859553028687	7.14785962755237	1.53286096921505	1.99324352645095	5.38917949033886	0.606717004437015	-3.03796817754806	-4.15889878761887	-1.1568108099505	1.25238390352232	-0.93625571310191	0.731286240359974	-2.17772517786449	0.180998626422178	0.161817184909835	0.882389445119406	-0.343800271558672	3.60138599268222	-4.09800464490774	-0.941615131611421	-1.50838989860194	0.943325984455067	0.504941169245809
iPSCORE	508fb6c5-c9d5-4881-9638-cd4bd04d822f	ae162297-73ed-4036-934f-82828c2125ae	ae162297-73ed-4036-934f-82828c2125ae	UDID050	40003704	79.21146502	2.31026107	0	0	1	0	0	0	0	51.4795541542827	-26.8705473713731	22.9998198747677	15.6891770433286	3.89673362623888	-5.53719382466847	0.0560086074645544	0.46002443918658	-0.257110477468154	-1.75701830503663	-11.7624228129345	-15.9929647752922	-4.34730048393088	-12.3297248608302	-2.27603779052789	-1.66332894832503	9.15616124151942	-1.9059272466323	4.4229736457861	6.77768421903554	1.45972772787826	-3.22747231612609	1.46116988436572	0.414175467448052	1.61862492406497	2.32874443443465	0.585604570982275	-0.636185430459255	3.06581390821285	-1.6298771070939	0.202434482192805	1.21268058780578	-0.699622451297059	0.348059813997986	-1.25206367151616
iPSCORE	633732d4-9300-44a8-8f20-f3e956e57819	af9a9404-08a9-45c8-8e7e-a5b279d46b59	af9a9404-08a9-45c8-8e7e-a5b279d46b59	UDID130	43853334	75.31913081	5.55259949	0	0	1	0	0	0	0	44.9964977989886	-17.1486928917285	19.5779906784049	13.2814263351508	-31.3539134883729	10.4359262110231	-2.61138799041217	3.488558187892	0.18421256984045	1.82603987201142	7.67921340632077	8.94064554197452	4.70616201148093	14.2315249547579	1.84107080954354	2.08054672345727	-11.9473926042789	1.63290854740367	0.990319431007943	0.697473828395609	-0.441867178066848	-0.279788636763946	-1.77064019046827	2.34880262864067	1.28039854134669	-1.10440769536687	-2.45735527033858	4.52704340637182	-0.930676883966184	3.021149375599	-0.845174384417767	-1.16835083161009	-0.138529032601506	-2.12415135890879	-1.58846763841931
iPSCORE	64c58f58-a121-413d-8257-294b229dd4c0	b0197723-0f29-4e66-953b-000b156a1a4f	b0197723-0f29-4e66-953b-000b156a1a4f	UDID171	57373828	71.01702888	8.099431678	0	0	1	0	0	0	0	35.6172132303902	0.953783061158077	-19.7341467614561	-13.4636282333456	-3.89810148976865	6.2758279022368	-0.0231318115499137	-0.882154145967387	1.5150965730441	1.44934350646236	7.45745086064533	10.4406015689884	-5.93125326492544	-6.17605811046794	0.00116057738894648	0.673196145178701	5.79206995260544	-1.39081202547998	0.633358251785318	6.35510618857845	0.623879432321516	2.49385002298649	-4.93388549734812	0.216889952156708	-2.53201786582098	2.77946170696004	-1.53388753868225	1.58318357864042	-0.618377809239748	0.360976785395207	-0.212555369603478	0.830782334326893	-0.165308964329976	-0.170020707131156	-1.2367031703334
iPSCORE	eb1309e6-5567-437b-82d7-549c1c8d5493	b0810938-c713-4d73-b7a8-90c382a08022	b0810938-c713-4d73-b7a8-90c382a08022	UDID069	63223554	87.08174172	3.75872258	0	0	1	0	0	0	0	49.5347642804455	-25.4726100542283	13.8843362408878	7.66138430079372	51.2751853989499	-23.4840608185913	5.54845471375402	-1.89852755666524	2.41368542689778	3.2213167626635	14.1087334741229	16.9964807738994	8.9921280923715	19.436550237016	5.02708984502982	7.91148905931426	1.93997319472923	-0.434193442249998	1.70751107650172	0.419001046056827	-0.925056165194545	-0.792493708312541	-0.312274005545344	-3.21695990635627	-9.41526944886945	-2.88245582383227	-0.305633887722317	1.65523891982098	-3.02064593220268	-2.11823386973505	-2.54399535194335	2.05991372490898	-6.52200689002017	3.20988254182496	0.964313510381565
iPSCORE	1a3241a7-f60c-4b9a-a469-74833c36ebd3	b0e17437-900f-423f-a6e8-30f725eefe2f	b0e17437-900f-423f-a6e8-30f725eefe2f	UDID070	79459485	89.69925365	2.803168181	0	0	1	0	0	0	0	48.5999648415542	-31.0101189700566	42.7458209378838	28.9648226973735	-5.86074744599683	-5.53128741717667	-0.762701145847339	1.29345533763769	0.12215803489051	-1.62695234656254	-3.470847981341	-2.7466657458753	-6.32091821537233	-17.6791809141845	-3.83082896000641	-4.98800408169227	8.20212218627265	0.269765735547228	-5.80053669139134	-9.5594100112745	0.387805990440008	2.01378101697454	-0.660533588877078	3.16827122575098	3.28068649212356	-0.296374770464834	-2.43924144173988	4.56540669653479	-1.49936841330098	1.71154006458116	-2.44391935577931	-2.25086775429403	0.228262276886036	-1.69871016842414	-0.826947357388378
iPSCORE	92516175-d525-442e-bd5a-816a1962d37d	b2d5b1f2-f506-4a38-b54a-946589579ddd	b2d5b1f2-f506-4a38-b54a-946589579ddd	UDID068	37843254	64.63036186	11.32952256	0	0	1	0	0	0	0	29.638751563314	2.01457735841182	-9.9483368601588	-5.49883975762451	-5.31007261804127	0.979072453370227	-1.14320725101185	-0.717302013400137	0.327944811924826	0.434852000035347	-1.73869991366623	0.532560433640101	5.57937666832348	0.529760608523654	-0.378651217737958	-0.195499116203064	-3.6146280763544	0.53562036436209	-2.40289484953569	-3.7769074392803	-0.162534898818373	1.72666539195038	-2.10552985035051	-1.6994300885853	-4.31639121465186	-0.783595589603961	0.346930007469569	-0.701932189931954	-1.95593359120463	-3.86912892221382	2.64000210613996	2.15920129479016	1.62514853593692	-2.17955687437108	0.924852108761769
iPSCORE	ed175850-c13a-4b33-947d-bd6e911000db	b373cd16-a1d2-465b-a688-9764210b59ea	b373cd16-a1d2-465b-a688-9764210b59ea	UDID143	41018222	78.55320009	3.640581983	0	0	1	0	0	0	0	35.9036930686611	-0.50328432106057	-13.6874017068483	-8.17762961521496	-8.76501108799918	4.49281309411963	-1.17511992073807	0.238929084508993	0.461337557290386	0.0262692818367481	-0.432405030510981	-1.76902993400445	3.54831589316489	1.81205359509201	1.25961316007991	-1.30777424918619	-6.40129556446743	1.97141376605943	-2.46939066297171	-6.23290953072068	-0.199921324155213	0.589198205519729	-0.621547386544874	-2.62982891978196	-3.48481424139366	-1.03872950937229	0.0308628510039451	0.145836239935711	-1.48178540723791	-3.49667100899156	2.191368976882	3.25731110801948	0.68985779094013	-0.98982357695556	0.377450165737494
iPSCORE	6a784dd7-9c48-4841-93f9-930b9de49cc4	b37fa297-2a4d-4bda-9b98-479ac1d6c8a6	b37fa297-2a4d-4bda-9b98-479ac1d6c8a6	UDID045	50914112	83.4991721	6.675386973	0	0	1	0	0	0	0	40.8753401837115	-8.1197919712307	-8.68982194832733	-5.49092377535093	4.08053194952948	-0.163613222007796	1.3049006111084	-1.41681190969341	0.0541848590238591	0.237114800239339	-3.22368968664779	-4.75168304974774	6.39581286196381	9.67424954559743	2.1869245513317	4.10287536274623	8.18230685012809	0.407616237334042	-0.671099485442088	-1.75950150193656	-0.894770919412147	-1.79294087268484	1.74691084665842	-1.35454329096221	1.13715767191747	0.448493544195609	1.5901930025171	-3.30419456434962	2.56384589529537	-0.826308298040553	2.17172266791382	-0.209318212959431	0.780743532841316	-0.424001273514755	-0.591449315531811
iPSCORE	6740411e-0edd-4097-9880-dbcdceb087ea	b5f0c53a-97ce-4d99-b771-987c47072bee	b5f0c53a-97ce-4d99-b771-987c47072bee	UDID289	37272264	75.7098576	5.944114369	0	0	1	0	0	0	0	42.9023536679998	-5.48255348126749	-15.8003043849924	-10.6329215626796	-2.1833134215452	2.98357558577668	-0.105056884933257	0.297730124563189	-0.433396444690479	-0.694107431085529	-3.22768760333496	-6.24755126897148	0.944902665581487	1.10304196018663	-0.174335589824615	-2.20608465659555	-5.62361465407552	1.3846946277589	-0.606940459509277	-0.957988557457426	0.263658849583009	-0.356601423263176	-1.44634456197626	-1.30220015863974	-1.90150764536936	0.0773405046854531	0.205617943851857	0.260857333090056	-0.802538149148603	-2.73440087279967	2.6777958049794	1.74681325864072	0.844160530345486	-0.344391879920892	-0.111027464914706
iPSCORE	639f158b-0cf7-47a2-bbd7-7599437df15c	b6b2a903-5d54-48a5-8ab8-de603322ed74	b6b2a903-5d54-48a5-8ab8-de603322ed74	UDID022	45127248	77.96822	4.096624727	0	0	1	0	0	0	0	49.9961558616759	-19.1649327663715	2.55952881564329	-0.749348439344942	27.73587310738	-10.682138922671	3.55754420345579	-0.224305792416262	-0.753668084603531	-0.253981254647522	2.67313507759914	3.94370306429083	-0.236213097809131	3.59211980316986	0.842193066714773	1.57547186702366	-5.35098442270513	-2.24630356923277	6.24247466914778	11.1082878552471	0.104181014507296	-2.04002971259931	0.725297841255055	0.672219874153104	2.49678611791067	2.15544780568721	1.2200033142658	-3.33623752958313	2.72767779554332	-0.32843449801126	3.70038067661346	0.962435683448169	1.27791098597494	-0.965414526928345	0.670850598249279
iPSCORE	f772212a-cd98-40f9-bdcd-e75740c1f6be	b958f299-3ced-4ab9-9901-fe7008745909	b958f299-3ced-4ab9-9901-fe7008745909	UDID043	56262644	83.87161115	7.460555889	0	0	1	0	0	0	0	39.1913222887355	-3.63041682322248	-16.0979490262854	-11.2104576120714	0.352999763906474	4.33072408436596	0.63006021415215	-0.946397418163033	0.504352452659666	0.104128004785762	3.50046760113836	4.61752634257985	-2.22976885184009	-1.64492756235116	0.804896357988531	1.49448112042637	5.45242110495592	-0.609763091368834	0.565907538255365	4.62042991172989	-0.115076950812259	1.03797542764183	-3.4870131417624	-1.27159317955746	-0.937814894861169	1.92406257826773	-0.0562193117053338	-0.776957067821656	-1.41551621775499	-3.31960906745152	5.1478032808595	1.678688563663	2.54761626352524	-2.33253540068234	-1.65323293624674
iPSCORE	4dea55b7-22ec-4274-9813-81eaa4f382e0	ba028778-120d-4162-a6e7-d77b670e1820	ba028778-120d-4162-a6e7-d77b670e1820	UDID126	39111590	72.82156517	7.388004425	0	0	1	0	0	0	0	36.4722660849181	0.535388633929985	-18.0620311193456	-11.9509002167654	-3.47330525308285	3.15490620609187	-0.498262045148251	0.20864752549235	0.17488689091964	0.290993432251849	2.19250969603034	2.99241370437834	-0.515732364169533	-1.42563567442149	-1.55322057160612	-1.6104668174891	-3.93805554235238	0.58839744712821	-0.673368612458713	-1.95008633532802	0.524327274411349	0.982670057575118	-2.16863311116807	-0.93766409585447	-3.27596903742994	-0.462372452755811	-0.280936349100187	0.948181745929002	-1.34683811719052	-2.4279669390113	2.69077970898144	0.881670936205451	1.10974039172958	-2.64205096262626	0.153756342124543
iPSCORE	bd126642-2257-4857-b3da-b72305e5c095	ba084bcb-6349-4c8d-bfe1-037a534b0856	ba084bcb-6349-4c8d-bfe1-037a534b0856	UDID282	38310962	80.72381999	1.921700635	0	0	1	0	0	0	0	56.6446085409632	-36.6044510667084	51.312311739663	32.8608020407021	-37.4713556271631	10.8777029279683	-3.55645243747397	5.33219638087378	0.656106857415556	3.46355503508747	9.36702841106306	13.3008592509809	2.44028697267577	11.1743705991684	1.40981652607871	5.17004321562612	-7.11243079487879	-1.06660365485177	8.16777488255024	12.9332950817156	1.69866602296613	-2.47087243988698	1.2286157344198	1.04662346393776	3.50659860709367	-0.836532385324478	-0.127879297850905	1.73637008018052	1.12531611546355	-2.6383733207388	2.39260349959543	1.49443051964027	0.859331998961933	0.61166377926433	-0.509257421186536
iPSCORE	1dd9eacc-e3d3-4d60-9dcb-60a17808cde9	bac66556-4719-46bb-9ce4-4a7e747de834	bac66556-4719-46bb-9ce4-4a7e747de834	UDID222	47911676	78.78010362	2.71834782	0	0	1	0	0	0	0	43.261730573965	-26.5537159122989	40.824485641652	27.87585220707	-6.23024079767781	-5.51329643011354	-1.04324962438156	1.08767286768391	0.836477285798296	-2.0360070630444	-3.18471611997358	-1.19672959719102	-1.35269406311308	-11.0875935011594	-2.38671474279572	-3.64682366379977	7.47765434888626	0.0684323229579729	-9.62253738707245	-6.26136125048338	0.100371623226978	6.30959454638692	-10.3502517597052	3.53560338501123	-4.64298199499004	5.48844804444209	-2.87822799757034	5.29978429251751	-1.04859446158312	4.60743462584741	-3.7221030942923	-0.82567107954367	-0.377669459980889	-2.66940842713965	-3.27081457152405
iPSCORE	f772212a-cd98-40f9-bdcd-e75740c1f6be	bda22bbd-331e-454a-90f9-527d8ea6126f	bda22bbd-331e-454a-90f9-527d8ea6126f	UDID021	64037652	85.48447404	5.114053838	0	0	1	0	0	0	0	43.4268164002947	-14.7136664418162	-4.11157087690409	-1.60340998500907	6.18566843667933	-0.478390065156049	0.633568452875052	0.299884681994246	-0.465502686811286	-0.975891919654561	-5.91082924163375	-7.45330659363568	-0.153059493656809	1.71981851620389	-0.679822739966762	2.95082827070782	3.85001981208388	-3.7133558700303	9.23942670290605	16.995664790803	0.103158866583395	-5.16152610302056	4.64622892970481	4.47738462110906	14.1209440501428	3.21625764464552	0.165410645066393	-1.59406547180131	4.30573747567719	2.06658630195701	-0.55221245276504	-1.86555094345726	-0.675280037714254	1.68103973482796	-1.17194599563095
iPSCORE	2f63f491-a9f2-4177-b2a1-c3d21ed9c247	bf8fa272-f2a7-4ffb-8b59-a1ce19cb954e	bf8fa272-f2a7-4ffb-8b59-a1ce19cb954e	UDID120	41042964	72.33144273	8.044769866	0	0	1	0	0	0	0	37.6369707904578	-1.94330222898684	-14.8730019514852	-9.90779164902646	-1.71969769938232	1.63491273070647	-0.293486081967063	-0.39035295353772	-0.215210980099314	0.0379019551017955	-1.99840604857301	-1.86101209789327	0.682732431059928	-1.27661499183476	-0.613072750560644	-1.19650007219389	-4.20290400684444	0.383769517609409	-0.339520818682754	-0.18782879775919	0.122047917277603	0.738848960558267	-1.23682722819741	0.557455026241669	-0.460616899604798	-0.842123062104511	-0.408102828033413	0.793404792490231	-1.81342129689542	-1.31751502238359	1.0399769838939	-0.113032160594966	0.974189326108947	-0.451990028269272	0.0613820497459461
iPSCORE	dc7b36c7-6492-4585-a072-10894fac10a0	bfcd28bf-17e5-4e44-9780-bb0d1b376772	bfcd28bf-17e5-4e44-9780-bb0d1b376772	UDID080	44383536	77.22464925	3.673546876	0	0	1	0	0	0	0	42.9668432333721	-13.7591924752114	8.98428363799185	6.61825227373369	-11.440399805541	2.68623887974608	-1.32759615232245	0.901031842665991	-0.157814702134899	-0.475176517931921	-4.19002008087838	-6.05326302463519	2.6316185895001	0.743088291915487	0.563321090001967	-0.23017271431249	-2.08364519639053	0.386497745951197	0.573495843378733	0.241271428445012	0.0515224580133833	-0.155731366996491	-0.0244683068827414	-0.122230215491865	-0.0518208266977409	-0.256748457661735	-0.271784876515581	-0.296931197554744	0.253389008961968	-1.31546177854873	1.04247170474348	0.822495426104341	0.866987628802717	-0.392043864447219	-0.0527814571851586
iPSCORE	e932e556-59a6-4f70-9b4c-ef5f69dac3ce	c20abef2-dd3b-4235-9853-bf297b6bf3a6	c20abef2-dd3b-4235-9853-bf297b6bf3a6	UDID044	60118886	84.75227901	4.848250182	0	0	1	0	0	0	0	51.9152242848062	-23.0074410052911	7.87353009604964	3.66041237486277	24.1373454795834	-12.1128618238172	2.38330687872321	-1.97043599660196	-0.384523242086917	0.304068226345681	-0.521408010920426	-1.7415443362529	-1.3964907864371	-4.84618806510101	0.124305204023068	1.85331246012201	12.0049333183878	-0.482472765016469	-1.06035307750264	-13.1412631080771	-1.44253171759348	-2.98927000044488	10.6442718741433	-4.61839869090898	4.29172787400403	-3.48434410233578	4.16439812338849	-7.11205217346704	6.50970761295273	-1.40166872978821	-0.293235612730002	1.69388230484392	0.367073502663405	1.97046513517343	0.833749329820428
iPSCORE	e3c5435b-935b-45a3-847a-fd754cbc7b90	c5d634b7-af0c-4693-bff5-3e77ac00f2bf	c5d634b7-af0c-4693-bff5-3e77ac00f2bf	UDID076	42078176	75.03850927	4.186726155	0	0	1	0	0	0	0	46.3116019728362	-6.55835555169771	-21.1424579774088	-14.7703890535308	-3.62457111049393	7.94440969605932	0.426179115086015	-1.12339965097263	0.751465795031646	-0.0651176550457574	3.22146795922936	0.445567514870605	-3.14286037142887	0.955906223277348	-1.3021498751776	-1.267103377855	1.92951264120065	0.930155087134857	0.0570015607925958	-1.78708450963731	0.759273713900888	1.36429086874065	-2.72412380566398	-1.853124090273	-1.51021606179203	-1.39741858865408	-2.97603572810791	1.92078835341032	-1.34030500355124	-3.94007015376572	3.2650240501692	0.504495100196038	2.29540752626566	-4.09281017299493	-0.739069477509637
iPSCORE	11c5e9cc-f702-4c47-91fd-201346ab5a3c	c5ed2760-caa4-4b1f-a221-8b79de270349	c5ed2760-caa4-4b1f-a221-8b79de270349	UDID097	74251075	82.27416236	13.70520764	0	0	1	0	0	0	0	39.0845348390085	-0.619271264643006	-21.6480040377226	-15.0265001465885	-0.937484289016419	3.38245181877244	-0.623340161964393	0.336088376051122	0.0710947079699796	0.382801250160039	5.8616091473892	10.2756712425919	-9.06681916527005	-9.74199461849969	-4.51127300982493	-2.22363262394663	-2.02537278813741	-2.33197012996283	3.75442487832878	4.09907801797519	0.92595790222746	-0.722696087795787	1.81396274865434	6.74987753578958	8.4326247274808	-1.41180313459672	-3.9044401284225	6.30351683374481	-0.103841889321982	2.37423870754633	-5.21167529479489	-4.70070633866567	-1.01386591341727	0.972500789235243	-1.23987042030886
iPSCORE	6740411e-0edd-4097-9880-dbcdceb087ea	c6c8076e-ce71-4074-9557-4e371a80dc3d	c6c8076e-ce71-4074-9557-4e371a80dc3d	UDID024	46757468	78.29360221	2.890866546	0	0	1	0	0	0	0	51.987579683261	-20.7720918528156	2.09296123638163	0.0334629450649218	24.0267635320624	-10.3399568893841	3.16882662127075	-0.338054724739434	-0.833388321654996	-0.0682687828570633	-2.71980850387767	-3.9790609507562	-2.65584400841679	-1.60044948580998	-0.122061035383713	1.11458914889235	-2.29629025851757	-2.16288405738287	7.56934128663284	11.0430692678487	1.53516985291876	-3.45014691235329	4.06700533622025	0.741965941890169	2.22484410664843	1.16178611489838	2.69588275425603	-4.26272863093326	4.1333590134911	-0.347509550594559	2.66170873693943	1.84185968563251	0.457044572978357	0.842521840481046	-0.159731790476519
iPSCORE	10571d4e-c0e9-474b-80b6-75c59ebd1942	c6e37323-0e85-4d3c-8942-2bac6c563359	c6e37323-0e85-4d3c-8942-2bac6c563359	UDID270	39289140	74.91912523	3.648010621	0	0	1	0	0	0	0	46.914678951375	-24.6538542491559	32.1637295197461	20.8897945898016	-26.0455745553674	7.49974611315181	-2.96144423605491	1.53890056742461	-0.192752027633052	-0.0168304713222993	-2.31022028427206	-1.77181630833244	1.43178646213605	1.13047683055391	1.33847115546906	0.184144775879435	1.64335965698824	-0.398317370975374	-1.73400376854263	-0.438769548693444	-0.894715176149072	1.10375220667321	-0.452202667844821	-2.08726234074718	-7.16608194804926	2.59836764922097	3.64415785484885	-5.86036717582313	4.81767442613271	7.82222602972189	-5.83630778070379	0.107874207882279	-4.70416358659548	3.6911051822995	4.0253038076601
iPSCORE	a77d48d0-a1a9-4f2c-ae14-ed6a952163bc	c8591209-4b35-4395-b48b-9ab31cf74c90	c8591209-4b35-4395-b48b-9ab31cf74c90	UDID288	40789108	76.10124252	4.911634743	0	0	1	0	0	0	0	39.2579114398102	-6.12453547804686	-3.66683398672109	-2.03030127745398	-13.4123074413513	6.29292329227282	-1.21059835339605	0.494804417438006	-0.0291058732722827	-1.04018737096402	-0.740833500367107	-2.84649451392605	4.79406922268092	6.66070303294875	1.49775402755134	0.112601206935263	-4.99578784022598	0.681533986557271	-2.11048653976984	-1.67699029910263	-0.328062668808354	1.26548283355922	-1.92398998494802	-2.29619406391085	-4.88203402835597	1.56506554060434	1.44633773649467	-3.23482855839136	2.0280826175115	1.76442663413421	0.0812286179318017	1.900854489119	-1.24239172599586	-0.178715139084198	0.281462660616651
iPSCORE	b846beb8-f53c-4b69-bd2e-901dc53ce8bb	c8616b2f-2110-42b2-b017-c0c0621a12c7	c8616b2f-2110-42b2-b017-c0c0621a12c7	UDID252	44346438	72.00260819	8.344598049	0	0	1	0	0	0	0	38.4269329547641	-2.09906005007647	-14.2381562288756	-9.87454840937959	0.0943313614409921	1.85326662061532	0.0175926088573348	0.600640146574776	-0.667451776451687	-0.635951239167878	-0.0965471216831842	-0.565209958147418	1.13852100076834	1.96551625763665	-0.189767833965706	-0.328551935771478	-3.94020943952957	-0.0897815873554106	0.00108926371615242	1.69266052794651	0.34054614916051	1.30265903386589	-2.60339389756881	1.18932063666989	-3.50124643192827	1.03247760662816	-0.403330368519023	0.189688736603085	-0.0436995314472903	2.27318314110712	0.0576089063232743	-1.34479489627599	0.918766644090111	-1.92488032604342	-0.250662000157111
iPSCORE	af5ba1a2-837e-42e6-9afa-16207886c776	c96bd32b-b1f0-4ac6-9486-69b992698538	c96bd32b-b1f0-4ac6-9486-69b992698538	UDID098	75124333	86.13696311	9.744714805	0	0	1	0	0	0	0	37.9026535638793	-2.27035111071278	-12.9318882008024	-7.5655362942028	-2.53752098490901	0.560872613474662	-0.359402512454737	0.386575422064053	-0.63838541594713	-1.50890357537755	-5.32182052706574	-7.90001548385393	1.9109937277287	1.41829254563551	-1.34191045400259	-2.18399984845064	-9.07202169272256	0.302910034009331	1.15621710131552	-2.02363121807739	0.154530962765129	-1.00127393563074	3.32885166705275	4.43340351585736	7.2452846183255	-1.31183612650035	-2.69167689116606	3.760373214847	1.11473989377361	3.46831743857559	-5.50240489678255	-4.27812365834377	-2.30340778592818	2.56771201167352	-0.312707731034151
iPSCORE	032f42b3-42da-4a6a-9b01-cdf540e1866c	cbab32a9-f80d-4093-a2dc-7bdcaa4f8357	cbab32a9-f80d-4093-a2dc-7bdcaa4f8357	UDID184	54464502	75.37761752	6.143498751	0	0	1	0	0	0	0	42.7069542755385	-6.89432005030683	-11.1911916791784	-8.06507397129798	-2.53634244972097	2.99570858855575	-0.188374895028279	-0.700284527553179	0.302706895328664	0.299300567200892	0.321347451495833	-0.783573632218144	-0.187343794922916	-1.43862271205057	0.27601103898538	-1.79040928136065	-6.3059294496778	1.7939155202683	-0.156591409640315	-1.52509110780808	0.073431728838968	0.939273326637954	-1.33180874755608	-1.98066650790251	-1.07489041144187	-1.88150959489423	-0.860744969026827	0.77918554179535	-3.70523684679547	-5.5049332301528	5.0092951706977	1.13612006803285	2.32135413876484	-1.26968729693115	0.383606205102172
iPSCORE	a385666a-9318-47a1-8884-3a4cd2d897ef	cd42f18b-2a3c-4c18-b310-ed1b9afc87bd	cd42f18b-2a3c-4c18-b310-ed1b9afc87bd	UDID226	42789904	75.46736726	7.123526148	0	0	1	0	0	0	0	43.3175428968294	-4.65700680630558	-18.3305225363746	-13.3785985178057	3.20552371517765	1.98633931461102	0.497848713134942	-0.239478231178385	-0.781951431978637	0.0875007690737499	2.31781980604697	4.03136481070019	-4.27286294778399	-4.15886555435543	-0.712804696406579	-1.31401525358068	-3.48441846310979	-0.106350456162577	2.09935279321381	3.71287839530405	0.673187674782654	0.389149855578097	-0.857792853908238	1.80564107858496	1.20379111637251	-1.03016405418757	-0.63634128939391	1.32284759331444	-2.29338994447607	-0.748318800891908	0.103487498977682	-1.96327454289388	3.68419884411895	-0.879724085647075	1.31011695650865
iPSCORE	fbabd331-fc4f-47de-b4d0-a9ee5434fa5b	cd6d709b-2970-4bd2-b64d-03d685d44792	cd6d709b-2970-4bd2-b64d-03d685d44792	UDID065	52663874	79.96672254	9.467518474	0	0	1	0	0	0	0	42.9132599101966	-10.6476788251963	-3.89659133019958	-4.10392620678673	-3.97799387476619	5.29750066246309	-0.190173012143649	-1.83003500973976	0.198746950383975	0.842533578602809	0.453761798615563	1.08381805713423	0.0827805955614691	-1.19559018843256	1.15210227594346	1.81976656623412	10.7387518412734	0.00826916617800847	0.139646151430441	-0.364962080354784	-0.49065116210669	-0.667347649753504	0.733755104576894	-4.19097930502307	-1.04822118573109	-1.53450584354751	0.875614323678313	-4.32390036449073	-1.30238487765751	-7.0796253755222	6.67789131873622	1.42135854333386	1.76724879829828	-1.41229743351562	2.2963218882245
iPSCORE	0bf3da28-3985-4c34-8197-5816fd73b588	cdccb7cb-5770-4585-a1e1-4f0ac6d5b676	cdccb7cb-5770-4585-a1e1-4f0ac6d5b676	UDID064	66378966	85.28944847	5.84711428	0	0	1	0	0	0	0	39.7665279298562	-8.9378874796211	-4.6908976939716	-1.95020389793532	-4.64712329626515	3.40183685145442	-0.324164821996216	0.0433682913046424	0.316420814848259	-1.27751539990883	-8.66074463331855	-11.4055204779406	8.46010964654964	12.1673744112366	1.81441067370392	4.16531355141491	8.07439686728128	0.0274227701817541	-3.33169916358395	2.52697372464913	-0.626146953604115	0.837130200190267	-3.60896094967183	1.99094315747216	-4.11292235291879	4.99077404293001	1.10264649444122	-0.703310858940138	2.74062574185352	11.5925578895951	-5.73073524981442	-2.86539522150377	-4.44908308292268	2.57634575156535	-1.62484617005063
iPSCORE	ef8f2c6c-8363-471e-9436-252fcef3ac43	cf416c5f-406c-4cee-b477-5d65bdadfd6d	cf416c5f-406c-4cee-b477-5d65bdadfd6d	UDID144	64673831	83.07405974	9.85404282	0	0	1	0	0	0	0	37.8571376621316	-1.50497188254026	-15.0464763796677	-8.98165954262954	-6.18031078367094	3.16256477303864	-0.994658746756042	0.419337105219941	-0.0307557793965474	-0.453830772927245	-3.70706931578075	-5.51664378298175	4.62394907562241	5.10416158509314	-0.0720209629634745	-0.247846611537222	-1.78875228789809	1.27276768434541	-1.62752993361749	-5.28575741972347	-0.535884749518762	-1.31269625537743	4.70370243022924	3.66625741688872	7.64553045709709	-1.275133464186	-1.48111643328756	3.45380456604597	0.829049424101993	4.22639420356494	-6.03666579635884	-3.99531563854995	-2.38385036224841	2.79661235845611	0.0794562444914855
iPSCORE	725e0255-424c-44da-86c9-bc0bc14a21a8	d0af51aa-8ade-4318-b2aa-29dac9c0ffec	d0af51aa-8ade-4318-b2aa-29dac9c0ffec	UDID275	40022886	72.72024311	6.436352441	0	0	1	0	0	0	0	37.324327374278	-1.24119127470855	-15.3884469359205	-10.055257308017	-3.39097453902426	1.85649588936573	-0.884625216984113	-0.0965073975437046	-0.108847853975241	0.013207738932813	-1.93436631850877	-2.51901493670551	2.66710620172017	0.380585796052901	-0.175953617555685	-1.96229082029284	-6.10106074827317	1.49883823181512	-2.10297376635107	-4.86607286833401	-0.137670977776	0.597275257256309	-0.608771893728107	-1.64700541323285	-3.21520156764848	-1.37927233760678	0.678518645982732	0.121443061317103	-1.95758997859878	-1.64870261559089	0.522265990165806	1.76899259241257	0.85549357033837	-1.28337302226225	1.32292224248556
iPSCORE	fbabd331-fc4f-47de-b4d0-a9ee5434fa5b	d1a50b39-a4af-45aa-8957-50616e53fe7b	d1a50b39-a4af-45aa-8957-50616e53fe7b	UDID108	61464538	82.83118308	6.708951428	0	0	1	0	0	0	0	42.3441925377743	-11.5111346920315	0.654659511546374	0.89853649043736	-11.8731641423864	6.90471015288777	-0.654458603262659	-0.277526411541002	0.615604556889715	0.657110595413591	-0.404203900876908	-1.20002908828452	6.6046344613041	11.9710325844603	3.95360429250042	5.7358187270944	13.8099046164936	-0.0681223872450683	-0.458673143159987	1.99055545559909	-1.57294152438153	-0.991821782995275	-0.472969798802967	-0.737826369560216	1.68781943125508	0.729044089871272	-0.48457413965834	-0.26332448804962	-0.619401498977515	-0.24923330779492	0.23315791472187	-0.131123265092411	-0.0561187185755902	-0.376784346501886	-1.06854003059169
iPSCORE	fbabd331-fc4f-47de-b4d0-a9ee5434fa5b	d526816c-c29d-44b9-9d4d-842a210675e2	d526816c-c29d-44b9-9d4d-842a210675e2	UDID026	56621078	80.36543917	9.329960125	0	0	1	0	0	0	0	36.6705648508311	-3.6982499970541	-12.5046260385718	-7.27731751216709	-4.95980732892023	5.58794408562269	-0.0423563219744723	-1.484566081135	1.40759525746914	0.755521312494923	-0.407797389660441	-1.16515340921416	5.70064783807651	7.62892544370837	3.24256235083828	4.36448795100846	14.6282389973919	0.459043739816394	-2.4219932578382	-1.08901973107743	-0.944048838953534	0.335675024276121	-0.863440334625066	-2.01912238087886	0.957762539888258	0.333397996302404	-0.47112259471331	0.307721199684362	-1.23151212607127	-2.70416167664455	1.3808623283877	1.3140088588783	-0.380709550203389	-0.468672881662832	-0.875055022159568
iPSCORE	27d69b74-d193-448c-91ac-2b7fb07a49ac	d666e508-443c-4400-9248-04b701b3c862	d666e508-443c-4400-9248-04b701b3c862	UDID263	48724546	75.29867595	6.280633174	0	0	1	0	0	0	0	38.4113001124174	-1.96909890502815	-14.5703448437938	-9.64913364012136	-8.27360066164013	5.82552345567496	-1.54414067330923	0.829244902660197	0.550968904088215	0.0684734118491787	1.98887818200216	2.2958000272967	0.248567969616258	-2.95881954708393	0.351765134319541	-1.70230357314626	-2.97381956728963	-0.112345208815051	-2.7159134190244	-5.05949425436745	-0.743447392928194	1.19180873498842	0.211801263557857	-2.84756169124748	-5.3452354378315	0.938291313502689	2.58718480313166	-3.77658780224601	2.64444836501335	3.09372450600667	-2.13219247932862	2.54759820849252	-2.98881701493828	1.51145158806672	1.30096747382023
iPSCORE	49e6ade9-4681-4533-9665-39362a71f43a	d894392c-720d-4caf-93c9-2d75f6fc83a8	d894392c-720d-4caf-93c9-2d75f6fc83a8	UDID182	45202748	75.93961765	3.75059941	0	0	1	0	0	0	0	48.9176142601814	-19.1395761506714	6.30262636507641	2.39970633636505	19.7984708074616	-10.2858952381525	2.42820032135367	-1.24132736278779	-0.700533883060537	-1.08763309628937	-0.101543032764649	-0.335674492913131	-1.35722047682022	-0.440521236176047	-0.336539923819559	-0.809411336854708	-4.0589869779609	0.181456519706	-0.723918414425784	0.408622556036761	0.458922787521657	1.3309185790013	-2.87483401043749	0.743393796185451	-1.94610964545731	0.875589257162661	-1.05860545810947	0.980518590861772	-0.784454658124019	1.19531274564234	1.54257350071518	-1.05014539804738	1.87186550829916	-2.81498300821348	-0.510476115031479
iPSCORE	ecc872f3-1dab-4076-a08b-f186d17805b7	dbf875b5-cfa9-403e-8887-0de72c8d20f8	dbf875b5-cfa9-403e-8887-0de72c8d20f8	UDID188	52398810	80.17419861	2.361698672	0	0	1	0	0	0	0	59.7288196437916	-35.3076310145409	38.5218609431417	24.3663984623934	-10.0858336358129	-1.53790924561097	-0.878516026006284	1.00594610047299	-1.10046200870105	-0.407379754229257	-2.83550199832547	-3.29988041519893	-7.64029722923804	-15.0724904045353	-2.08233942584166	-2.7803139887649	6.87955809224381	-0.866013380306757	4.40181793580783	3.59918367653742	1.10544748711208	-1.30538077631447	1.13236660987622	1.41106151956898	1.77149405383871	-3.93693407765162	-1.72839902529862	4.61428432448215	-5.64771282152656	-7.38422477091873	3.50796420728225	-0.701657686818761	4.10721879721038	-2.8121417827343	1.4414537448673
iPSCORE	f0173728-58cb-4d7d-b28d-02355b49b9ed	de379b99-06c6-4238-b037-635bf2b9e88a	de379b99-06c6-4238-b037-635bf2b9e88a	UDID049	50103232	84.75295965	6.571787624	0	0	1	0	0	0	0	38.3549846626586	-0.820181798246265	-19.96665360941	-13.201498130233	-5.6585172945048	7.4617029918931	-0.270417652000726	-0.193256669961339	1.27679894270824	1.10439852224665	3.93287026590795	5.1882234372047	0.804888759472612	0.736072731485598	0.929771019460238	1.39607223752889	7.99537017274042	0.185647081459612	-2.09945809075876	-2.10649608551935	0.14162419284431	0.581920713355715	-1.9146582459934	-0.840275927839625	-2.59597109855098	-0.286279563698484	-1.04215662934552	1.74639342725067	-1.67443661069883	-1.87624628214786	0.579026212868843	0.791324785453604	-0.561073959691911	-0.252326231697887	-0.52353970248553
iPSCORE	060066b8-6fc6-4b00-b7c4-ae195f646f5e	e0f6dcc4-472a-46bb-8461-d48fdf3a8b37	e0f6dcc4-472a-46bb-8461-d48fdf3a8b37	UDID089	44117620	80.63049639	2.028948978	0	0	1	0	0	0	0	56.5200319390238	-30.1817391867166	20.3611067005449	9.70365226427461	53.0586238815204	-27.0121939997195	6.01611811343731	-2.37108009742847	1.13331109341695	0.976031997265538	12.0252978805036	17.3059758971168	2.67376223506541	9.98031109979791	1.73986283068204	1.22145451896932	-12.9304144242337	2.38109969958749	-4.60919624716428	-7.44717586987749	-0.808273596313451	4.89606350939561	-6.15255286727222	-0.138506936907012	-5.81259829866633	-1.62836806752288	-3.5033299370321	7.23600617320053	-8.11288403228552	1.96812502693258	-3.36504685982342	-0.586462646670632	-1.79013375603308	-0.327469190443836	-1.33688833451418
iPSCORE	35bdd022-52cd-43e0-a658-3ea802787462	e279b91a-6fc0-4145-8436-a6cfecfbe7a6	e279b91a-6fc0-4145-8436-a6cfecfbe7a6	UDID124	53023929	89.82887519	3.844192685	0	0	1	0	0	0	0	54.1421473079508	-24.5874778200983	11.8406486502613	8.32586474331198	6.26768158189805	-6.07160324321873	0.844288717265447	0.118572485092973	-0.903043222506762	-1.79333632822461	-12.1862472329113	-18.5528049936629	-7.1660277877507	-14.6464982617845	-2.65638049370356	-3.54237258437391	6.66941093961279	-0.530008651668534	4.32038501229317	-1.13705796719162	0.582092915393343	-6.14468655648781	9.48058062270654	4.19358892089126	14.6886015239043	-2.23040927492988	-1.42087992341293	3.97448471149155	0.953160659679475	-4.78784847955001	-1.25662321534283	-2.16979398783827	-1.7445693523696	4.12974974335478	-1.2684288025434
iPSCORE	e562a8bc-cc91-46fe-ba2f-aa8ab62fefe9	e39a660a-19b7-44c0-9ca7-08bc0e1aab55	e39a660a-19b7-44c0-9ca7-08bc0e1aab55	UDID135	44361140	75.52882095	5.63878656	0	0	1	0	0	0	0	41.3354484346002	-2.13664850909744	-23.1637851976257	-16.3456358082373	-2.69320423970786	6.72242731285759	0.204090974768758	-0.477866965962127	1.14506261078165	1.45321917240361	8.84097408929171	11.8097803064017	-10.3347894026441	-8.49843596749997	-1.35499477131184	-1.40327538616811	3.00542314379808	-1.31921401909887	1.25473004661294	5.70447913252926	0.123981674577022	0.949670403934456	-2.55387640733668	1.71493854875122	-0.380042700826325	1.56060577858222	-1.01000076535812	2.72198008070003	-1.02470662218196	0.57637874746521	0.504691274473846	-0.770987972249724	0.700417419660542	-0.881785463521236	-1.43983595853741
iPSCORE	10479353-d46d-478d-86f0-c6be025de81b	e45ff871-b499-4c9a-8714-7d0b65eaa7b0	e45ff871-b499-4c9a-8714-7d0b65eaa7b0	UDID138	46727774	73.0032721	7.366629534	0	0	1	0	0	0	0	36.4088529247639	-0.830941850849135	-14.035762797032	-8.69818426225676	-4.98252702972917	1.81377550120406	-1.21201787093208	-0.0508528388083189	-0.0543943469974406	-0.0651292264905965	-3.11737312588344	-4.09087014410713	5.07934139347752	1.44951272528297	0.252280699423747	-1.89721917109413	-7.22909777029753	2.10465432391403	-2.92396623966574	-6.05984858545194	-0.0178071132231799	1.29252039198226	-0.926214815747063	-2.06644848818723	-5.39924436544154	-1.02392803279012	0.815593743229535	-0.117687096808239	-1.96906747313356	-1.45172114173476	0.261787838797015	2.5063511423405	0.0304308937953562	-0.323721663874839	1.48128906546489
iPSCORE	7df93333-f21c-4775-8679-c2518e05bce4	e467ed60-660d-4d5f-89a5-056758f534bd	e467ed60-660d-4d5f-89a5-056758f534bd	UDID281	35412198	77.51800665	3.085868886	0	0	1	0	0	0	0	47.0625746410519	-28.857181281277	35.0516500339449	24.1799701927772	-8.41462795766437	-3.52504632648904	-1.07200529228034	-0.586355883255925	-1.26346497351258	-2.15528020753901	-11.1598053692528	-12.6504331568848	-5.28103636085611	-18.96102101678	-2.56036497385144	-3.00022281445548	17.5269919835176	-2.01627628186447	-1.57254372606639	5.51472855058309	0.901526110141903	3.78963873439794	-7.17687334922065	3.45345038455891	-7.80368061260314	2.51719820376567	-0.838544746475458	5.43042795908835	-4.94015638800578	2.77532374436635	-6.01068406427875	-1.95318787240182	-2.04869015972256	1.14087737339333	5.35055172943088
iPSCORE	40862b64-d0c1-451c-8c63-1d577665626a	ea0d8889-7fd9-41f2-8db4-a96887ad719b	ea0d8889-7fd9-41f2-8db4-a96887ad719b	UDID158	60010228	81.76535173	8.981752244	0	0	1	0	0	0	0	41.0768941643096	-5.62855080475606	-7.75452240635412	-5.1779252527321	-11.8085877528481	5.04619200340361	-1.59343719669515	0.381785148188655	-0.0409777449945608	1.1022634290169	0.483776117103998	1.4012745095066	3.32485479644843	4.70800962284318	1.12121261205841	0.202756380197417	-3.52321092116379	1.74325961653377	-0.288631380235345	-6.54627933503434	-0.162783558642239	-2.86102510292039	6.91335569434822	2.1823083881981	10.1236532989593	-4.51811925292505	-2.0136518761437	4.50836892083259	-1.89637924845919	-1.14660651906828	-2.0615487338494	-2.92317756552071	0.00390320429679237	1.75027524877828	0.648318748145555
iPSCORE	993b2a06-29d5-45bb-acc6-baccc2bdda08	eb48ec7a-c8e8-4cfa-9c76-5523ab3f7e17	eb48ec7a-c8e8-4cfa-9c76-5523ab3f7e17	UDID161	48567892	77.80080717	5.455962552	0	0	1	0	0	0	0	45.1882101223656	-18.8452313791376	19.1401123237412	13.0841591473919	-20.436780971789	5.50927716808542	-1.74355759424779	1.37180194205797	-0.812023578480696	0.286475424285996	-2.19302683619885	-1.74916671868434	1.44286445570075	3.66618892106487	0.202720287633589	0.530256533754325	-4.43520439155525	0.336311158692547	2.62733099325217	6.78186428498757	0.43878729216538	0.820219603355756	-4.38722210816242	3.47562147170466	-0.162810048364736	-1.39713681094648	-2.63199437572886	3.69767069704849	-4.37961007251657	0.356839033039368	-1.40726816664979	-2.73858010272716	0.804482441294581	-1.26024378565966	0.614167594806948
iPSCORE	9d988cb0-01b1-4d5d-bf4b-3fd3baf149a4	eb4ed764-04bc-4309-9288-1558e7070dbd	eb4ed764-04bc-4309-9288-1558e7070dbd	UDID256	44545494	74.20944978	6.207756951	0	0	1	0	0	0	0	38.0592478277621	-2.23338279235538	-14.2700847649903	-9.10467648650866	-5.34875651033128	4.2224091043691	-0.608243341195842	-0.255038148867144	0.394062055480071	-0.513617485695211	-2.16326373978583	-4.38044033719673	1.9054025969551	1.173572499252	0.921031763940065	-1.22679989959852	-2.95912808420023	1.49849675193096	-1.75882413905731	-0.561304213225768	0.142040781139103	1.3414977682745	-3.10822754031256	-2.52368100830568	-3.2230395370576	0.453011035832776	-0.673227908732352	1.39386650832328	-2.92068798979534	-1.89341349443667	1.87388729781523	2.41902137544781	0.213630139319305	-1.68957838075739	-0.225563579087209
iPSCORE	000a5dcf-764a-4f69-ab1c-5950cec4bbbe	eee96072-e740-4967-ba17-c9178796fde1	eee96072-e740-4967-ba17-c9178796fde1	UDID106	76515579	81.30197773	13.01320219	0	0	1	0	0	0	0	33.7794679189853	1.42282010069217	-14.4940107339047	-8.44545855604978	-4.46796150628667	1.09578610053574	-0.930932367951675	1.00328699296866	-0.710445243208353	-1.13977714755315	-3.95925733294978	-5.43852029909818	2.3506426514166	0.256234190501438	-2.22014605079216	-2.62040042760034	-9.61775157358793	0.130263596002942	0.508345385282954	-3.4245388012016	0.466658359522311	-0.437254152064634	1.96041827182268	3.40584774918594	3.48408776369689	-1.12294255365427	-2.25667304999294	3.27187037371274	0.300689722286295	2.88244958976191	-3.88073528624168	-3.83590981856496	-2.124411029089	0.964666913197143	-0.546916374055654
iPSCORE	5595871f-2997-41d2-b749-6ad518e89bd4	f05f747b-da51-4000-894a-3b64503c67fb	f05f747b-da51-4000-894a-3b64503c67fb	UDID037	52664316	82.34571584	7.655263196	0	0	1	0	0	0	0	41.2390969019725	-8.08925312363038	-8.65012694445125	-5.68459731595716	5.58433468622517	-0.126438880526166	1.04823437383934	-1.09245815208679	-0.305121854652285	-0.149858374046793	-2.61510939592967	-2.50532791476387	3.10523719564983	4.5201818964787	2.27056415994196	4.07920296148464	11.00919911689	-1.31191715347569	1.25296572353895	4.91417014415219	-0.134153666114208	-0.735919584550428	0.778075877731759	0.955719849687157	1.841758081103	1.69373700106716	1.03617946170718	-2.18897130796137	1.20700295548966	0.504005645176678	1.18282144323415	-1.17253186303264	0.33441375108696	0.624068544894489	-0.010122280551358
iPSCORE	e126c62a-cd3d-4ce3-b632-da7fb7bd9e4a	f0990beb-2f84-4bbf-a941-cc1fdd76ecd8	f0990beb-2f84-4bbf-a941-cc1fdd76ecd8	UDID103	74590531	84.37389191	9.404575763	0	0	1	0	0	0	0	37.9947409967221	-2.63178694989849	-12.965327937645	-7.99939726265032	-3.70513114375593	2.42610814157085	-0.140518611171773	0.0669538827312327	-0.163971286992225	-1.33141004409126	-4.06650115970826	-7.69858661926031	0.69597425426062	0.428874699172412	-1.84252963778106	-2.59927919670519	-8.10290813270614	0.598623250934751	0.853364106912313	-1.99778713606419	0.416377782305762	-1.35205212171649	2.01404283718025	1.44247926255212	5.35495778653384	-1.46110202581565	-2.95796942247268	2.6402507778253	0.90857349597303	-2.05558768901622	0.222021095448399	-2.15545144143004	-0.91225639787328	0.650900573737618	-1.90693084957147
iPSCORE	f378e99d-b59e-43a6-ae60-5b2b180209c3	f25c5fd9-e44f-496f-beb9-d49d0c5f3e9a	f25c5fd9-e44f-496f-beb9-d49d0c5f3e9a	UDID036	46768702	81.40756611	2.336019503	0	0	1	0	0	0	0	53.1607199390255	-28.6511054944009	20.1485424664617	13.0314495773911	20.1113202383739	-12.8729898876958	2.74834874084836	-1.01191686495023	-1.32577924651048	-2.94035291513512	-5.57966782730349	-7.88908780222076	-5.5038473110823	-9.0309480592003	-0.730302743579046	-1.22260963188212	2.56537164096682	-0.842381936889228	-1.46480479290148	-3.94191581417052	0.0449288193933752	1.68983599268457	-0.276648520819697	1.4236897701285	2.72899577486486	3.97037789919335	0.00243839179266697	1.14178148663791	4.20890204964134	6.98678811502009	-4.43485834009184	-0.780243842128484	0.838719157334322	0.392869166465387	-3.65445840496248
iPSCORE	10571d4e-c0e9-474b-80b6-75c59ebd1942	f3232855-fcd7-4f44-b924-9851beebc4f3	f3232855-fcd7-4f44-b924-9851beebc4f3	UDID011	37881424	76.14795579	7.38788489	0	0	1	0	0	0	0	36.6487041938959	-1.210303810354	-14.4692289197503	-10.7384038468376	-7.16680435215512	5.16147555321932	-2.23412976087406	1.19721700760889	0.535172317405905	1.3606591905681	7.59936649098691	12.1256218887694	-5.74202220082564	-11.0073606475925	-1.76548273735931	-1.84855682048529	-4.36434043020442	-0.372548184850548	-1.98149851079719	-9.61801316906562	-0.64505678866795	-1.17890713215036	7.27938019081459	-4.6265537922534	0.62668623147742	-2.0665467633248	4.82950160748449	-8.16781112161298	6.27883354422485	-1.53632210347673	1.73084170566238	4.01667647867879	-1.2509741227974	2.68590552363441	1.7617325735456
iPSCORE	214ad59b-7245-4ca7-bf42-84cc2e09bbbe	f345e560-b4e4-41e1-b0cf-850b764b3f36	f345e560-b4e4-41e1-b0cf-850b764b3f36	UDID279	47013434	79.58707292	1.128622087	0	0	1	0	0	0	0	55.6137429037027	-36.1129103121677	49.7884500659262	30.9999643754276	-10.4280641882109	-4.008703846962	-1.82175115646178	2.3791827464914	0.0910655830495348	0.32810104106767	3.9514140610805	6.05645676904391	-6.81141968221825	-17.6321816795116	-2.06194715976604	-5.50733269050809	7.03118618732168	0.535272008387574	-8.10686511867036	-17.508073262309	-0.555642942423494	2.28399050860328	0.807735048572787	-1.12223093621232	-3.12179707444435	-2.22316546363362	1.00477893821241	-1.09948395138127	-0.620002985355435	0.0851458595540957	1.22477296695743	0.226867172664943	0.437231155888819	0.0297866814025569	0.302499911659029
iPSCORE	749a66fb-0d16-44fa-b263-cc4e260c5fd6	f7b48d9d-678d-4121-a4eb-b6b3f3ebf983	f7b48d9d-678d-4121-a4eb-b6b3f3ebf983	UDID200	34839276	76.85593122	6.14397383	0	0	1	0	0	0	0	40.813083148942	-4.76881981961046	-11.2164494241015	-7.39717929697816	-7.27286912226241	4.09545542992875	-0.638352441864831	0.534659509807646	-0.0923827532635928	-0.0315752276476398	0.797939915452251	-0.193086985058645	1.95118114476875	2.55945788224096	-0.0783239811645194	-1.39693801455228	-7.44294508490585	1.60063988009635	-1.00395784810788	-2.91321383050732	0.531113544453797	1.09676828216053	-2.39770250955378	-2.20688657664914	-3.95914007965154	-0.883453241205654	-0.65567187671361	1.21337019350163	-2.57485285688838	-2.20255606791576	1.65989791624802	1.68427581397901	0.740029833024053	-1.84616623744156	0.220782357628544
iPSCORE	750ff979-f5d5-4e3f-aac9-dad97ad8e948	f9db200c-03aa-4116-b498-f7dc8bfaa49a	f9db200c-03aa-4116-b498-f7dc8bfaa49a	UDID165	49964340	74.11317352	4.78677793	0	0	1	0	0	0	0	41.3559865365056	-6.36966854966181	-11.5384921060353	-8.04619989067574	1.87522998286565	2.03217892717139	1.25199508447134	-0.285616042972977	0.230777855581677	-0.159584667209888	0.0933702417537895	-1.3730091755818	-2.59374503486145	-2.27894387554762	-0.0805335018202577	-0.477045104196688	0.709406335336888	-0.479205546782454	0.7263339762724	5.73038111557148	0.743673269622621	0.320077268126797	-2.60151269779706	-2.30019426703791	-2.47288614065565	2.04042705595673	0.245745185680649	-1.88417075737707	0.84011895128521	-4.32584999788095	6.25750997308082	2.82021015895488	1.71534335139384	-1.59061123661751	-1.90367976308216
iPSCORE	c9ef3edb-1bb1-4233-a6be-4efd897ac110	fb3d9eff-8c62-4146-9280-e2023080704e	fb3d9eff-8c62-4146-9280-e2023080704e	UDID249	44131986	74.70179565	7.55023352	0	0	1	0	0	0	0	36.8854383296561	-1.00893332849386	-14.0955921624928	-9.05906159875653	-3.06502753012466	1.40374555304383	-0.770681193784684	-0.0971657760086379	-0.677157653806823	-1.04560619112859	-2.00815385185613	-1.95572545618044	3.18416827277461	2.28380820306005	-0.99412056289748	-1.63794637493798	-7.25288949686002	0.781564410590704	-1.00940743346446	-3.1731446736933	-0.682588092854955	2.26820683114586	-1.75668652014669	1.22455617978052	-2.47708753600001	-0.851816765709371	-0.835592639969048	0.875733324356232	-1.0625242171654	1.99668002875149	-1.95875349981438	-1.62179281588805	0.261265657230435	-0.493671150091389	1.17707888412366
iPSCORE	9ab06fba-a1bb-4736-930e-15ede9f493c7	fc4d4354-e6b6-4c4c-8ca0-882da9dc92c9	fc4d4354-e6b6-4c4c-8ca0-882da9dc92c9	UDID016	46039676	71.09244644	7.669697762	0	0	1	0	0	0	0	33.2286093436346	1.03731119990909	-14.8309212705776	-9.67094298077122	-4.93323849926356	2.95219004804908	-1.43489202057724	0.2361340710657	0.172476111882109	0.908523298160414	2.50395282735233	6.58553962486227	-1.11380805137383	-6.05176600653208	-1.47067226893699	-0.938302643535767	-1.78007465802095	-0.10411889630921	-2.45804738455003	-6.53590603107936	-0.222063727234288	-0.0238433742932211	3.47854338478253	-2.3641284400759	-1.09844643803901	-0.997822308282207	3.25733114997193	-5.29226712738877	3.2420674233259	-1.0666378174513	0.815681768972939	2.83909533036991	0.395066294651182	0.64460511672584	1.83233185306255
GTEx	GTEX-UJMC	GTEX-UJMC-0426-SM-4IHJF	SRR1068832		84728392	84.60601259	7.290366138	1	0	0	0	1	0	0	-24.2648418035768	-26.1084612453234	14.0445613541506	-26.8611499653583	-11.1097477111823	-12.0898634219343	12.4634357114062	-7.12285969613493	-17.3406365519117	23.5211971568485	2.92656256864362	-4.68992802206675	-1.86990359274602	-0.12655744619845	-5.58729874845699	11.044110760094	-2.43129472196521	-5.90942625336414	-0.613091093992623	-3.19313141206301	3.189856448569	4.47422340729025	-5.56691543569296	-1.42143250215482	1.21825033383665	6.68410768211901	-0.333237404968735	2.28964119148739	6.52106843262237	1.00285063857325	6.20369154427145	-5.74712674662765	4.9069425963591	0.886326528698161	-4.1714842070337
GTEx	GTEX-XV7Q	GTEX-XV7Q-0526-SM-4BRWR	SRR1069376		83606572	87.20112816	5.753966327	1	0	0	1	0	0	0	-18.3999047042122	-18.3125787837531	-10.1174137510716	10.0129736172666	-1.3362408477691	-1.10110477939217	1.7723785644741	3.77034483597946	-0.498671447985723	-4.5799058856923	1.01473594692189	-0.139157627530456	-0.608803356176207	0.428961625124389	-0.00275104053662855	-1.24948081208388	-0.396896520251594	0.689234189968598	-0.563190162919954	2.08206981874299	-0.669129693009885	3.53830886895807	-0.223179130122328	-3.83738764757894	0.987444653127975	-1.77193614939141	1.7157441877282	-0.417855123979974	-1.86781433610922	0.439946866607304	-1.4269335960971	2.19725929866488	-1.25242664406694	1.26702811443844	-5.8061057978317
GTEx	GTEX-XXEK	GTEX-XXEK-2026-SM-4BRVE	SRR1069690		93629522	67.1277399	27.06597391	0	1	0	0	0	1	0	-4.49055646064319	10.5455470839173	9.22708470860412	-3.51690981979025	3.20349964714993	6.30921929287779	2.84826568432141	-0.940702796271593	-2.8355025587732	-5.30238976972077	-1.90520074682641	3.44372135988753	-0.0128580984151762	2.33400799181454	-0.0823597445458813	-4.10909467036737	-2.52880079363221	-3.20539998744184	-13.7533435670551	2.58541739456953	-6.02955693264444	0.591846795997273	-0.631144475026951	5.52780943089068	4.15578497498262	6.08859573944724	0.515555891861291	0.744615976681082	3.13268771311543	-0.43935019089841	4.67508264161025	0.0746092739161342	0.712190678332021	-0.182405643486988	-0.63709874222451
GTEx	GTEX-XXEK	GTEX-XXEK-0926-SM-4BRWH	SRR1069802		86855638	54.7581701	40.19612636	0	1	0	0	0	0	1	-1.30340132630452	20.5835524508212	-0.179370104552218	3.20478340375186	-2.94022879280872	-6.62818826202698	-0.77820223732061	-3.69288962872751	1.6922778968126	-1.14353723241965	-0.633507202205348	0.242892129645653	-0.656818493614335	0.321721092119027	-0.259706100079664	0.193906853617524	-0.687538565498601	-2.12393894125585	-0.0722338501452391	0.0071250246418853	-1.0185681866696	1.3038968276583	0.0843480276412458	0.422515712675393	-0.184359071040618	0.64102119264934	-0.676396192151811	0.150140891905207	0.906196793144936	-0.911701646447875	-0.547176938729765	0.101086062184226	0.676709108100873	0.959013825240026	-1.01593905669158
GTEx	GTEX-RUSQ	GTEX-RUSQ-0326-SM-47JWS	SRR1070111		77556540	88.33204782	3.327639423	1	0	0	1	0	0	0	-18.7389306119852	-18.1747627721471	-10.0469253113181	10.2563871208396	-2.66875458474056	0.258563198884589	5.12038600465687	-5.66020069346473	-1.41914244821125	-10.1473369576975	-3.74485950407933	2.24343871957364	-1.32379334365495	-2.16804733685059	3.65255801843078	6.38370608460519	-2.606055123697	1.62714768906179	-3.00808728867119	1.66315093517107	8.13202206426429	3.7966282037096	-4.12711878993191	-3.80370640858887	3.92935415518221	-2.94554985769233	-1.73911656329264	-3.7223078115168	-0.53475594267339	-0.0405318341397407	-0.673110095337953	-0.321551546073569	-3.07515888588904	0.0569459711913275	-0.871265585280784
GTEx	GTEX-PWCY	GTEX-PWCY-0426-SM-48TCW	SRR1070308		64876622	89.47144628	5.522574834	1	0	0	0	1	0	0	-14.1929849473225	-8.44173109103723	-6.33791533168736	5.11075437376485	1.0827249367708	-1.87794304960259	-10.7584617440975	6.64741300964318	-0.843848175554277	6.82303729815281	-8.94070312182427	3.88990557180034	-3.51943695106698	1.27261467649368	1.50332140763458	-0.832750939844271	-0.987577811029284	-1.94123405710681	2.60976570929832	-1.67154024590849	-6.94374051734419	-2.26985383572235	-4.58514769177078	-1.50367713952453	1.20352186350317	1.06087044847073	1.55439583684471	0.631364082257917	-1.0910502254306	-0.941252861337304	-0.108685091662089	-0.965947470911779	-1.67979962969447	2.52807954358382	-0.703337967534698
GTEx	GTEX-T6MN	GTEX-T6MN-1126-SM-4DM71	SRR1070641		86718136	88.56665692	2.192268063	1	0	0	1	0	0	0	-23.2913155741293	-27.2008816048867	-10.1745171045346	7.41577469381931	-3.23324402602381	-1.13375327221238	10.7561188493085	-0.139974670964216	1.18847446309821	8.48545422769334	8.41858109427746	-6.96291183010588	-2.01832541153973	-1.69469879394262	-4.33693600508541	7.78996602862789	-1.82330654299561	0.301754205070086	-5.41309943705743	2.31598204043902	-1.12782310517091	0.767698689142851	3.91398809914941	2.99433790052875	-1.64824660589942	0.378292734438137	4.06997631100426	0.341459486006052	-4.36361024126273	1.56272363325793	1.38739984358682	0.723396041647217	2.160171713793	2.10471246679785	-0.552659041113879
GTEx	GTEX-V955	GTEX-V955-0926-SM-4JBJ8	SRR1071644		92780754	87.5975593	6.401252139	1	0	0	1	0	0	0	-18.9345916395501	-17.011983053786	-12.2886999201889	11.6661656555622	-1.99125850725698	-2.32319561407038	0.501784132471611	3.84402636917052	-5.41896440645096	-4.35841514493992	0.768343831540485	0.651683642399876	-2.10046959994965	0.17713754698315	-2.82040641570404	2.95386142834043	-0.861425405657911	6.17869462144221	0.0495289590811932	-0.0561134260383661	1.92429597868881	4.42259910191849	-1.84764900693266	-1.881706154078	0.382980145372389	0.31011734602964	-2.33670948956292	1.929373118958	2.03169497039693	1.42662093988945	4.21096728619182	-0.434905777238096	-0.0637634460241315	2.65175017393486	0.455818158510673
GTEx	GTEX-XPT6	GTEX-XPT6-0126-SM-4B65S	SRR1071692		160911288	58.01678997	36.08567101	0	1	0	0	0	0	1	-1.37788908369278	21.0027484437632	0.714058639215324	2.08411516740139	-3.37736907935892	-8.48274375835178	-1.96465506644269	-2.64895178407172	0.913827794252997	-0.315986115415509	1.2694538366656	-0.953611275419575	-1.72545116182788	0.726545160298056	1.29173857526811	-0.325152927907231	0.033240257825759	-0.217463556134496	-0.506196836835331	0.366324995978715	-0.623263671080843	0.161694851267172	-0.152356521397894	0.673782856830626	-0.650577971942607	0.374454135206519	-0.214602884839652	0.12641381229044	0.900442122524303	-0.902507388651298	-0.234401933800195	1.20828322971374	-0.0643050979235795	0.59915995904004	-0.503246730763933
GTEx	GTEX-Q2AH	GTEX-Q2AH-0626-SM-48TZJ	SRR1071856		96167108	87.45734144	5.289789935	1	0	0	0	1	0	0	-28.4692916507678	-28.0910398246377	22.7431108128866	-44.004619722297	-11.0349695388416	-15.3161555848205	17.6496026387305	3.95027702454011	10.0633579175144	-0.822617241988891	-6.84976261719027	3.49245161407295	0.520525342607198	-0.643672359475937	7.47695769807301	-4.65582379557873	0.0451001141271998	-1.80620118532477	2.62432836678878	-0.0184062678601657	5.45312326853605	0.865828530151407	2.03628055939893	0.883192334523359	-3.63232838819437	-2.08678848707723	0.252772154041663	-1.69323804537519	-2.00088717844651	2.83570171824629	3.49119234532379	-1.09622930501559	2.12164599363361	4.18559274331249	0.104233726552236
GTEx	GTEX-XUW1	GTEX-XUW1-1126-SM-4BONZ	SRR1072078		59192170	88.80361372	4.358600132	1	0	0	1	0	0	0	-20.7173665857017	-20.747223649755	-2.11224535276836	-3.33245458767153	-3.29191536706918	-6.27762365177253	1.14271320319629	0.748136126625048	-11.6739781114629	3.06317107726889	4.06037903046385	-1.58294039197346	3.37168554437088	0.077901140668201	4.4885529624069	-2.75359211260826	1.83077136324738	-2.37090598905269	0.0624318109464111	-0.500124067674865	0.92407395288713	-2.2349480327179	2.18741788656194	-1.09516049909929	-1.86314203137723	2.36440458286459	-3.59769710326406	2.33042506342581	5.26861541968963	-2.9814504796303	-1.72255465133857	-3.78514882655459	0.0852598395169809	0.0215922234103704	2.5086487847138
GTEx	GTEX-PX3G	GTEX-PX3G-0426-SM-48U1C	SRR1072749		75108668	90.29216441	4.212176949	1	0	0	1	0	0	0	-18.8823660217335	-20.5190643617038	-3.59723488327921	1.19972332494939	-0.0200381367166607	-4.42646501503581	-1.00864278586555	7.7103152225271	-1.63499943200857	3.64237764479246	4.11461871600479	-2.83512545251173	-0.423938228167273	3.30765965321293	-5.73359316586929	-5.82291694190061	0.33665457512644	-6.5088489256013	-6.14150352049612	4.02461299219502	-1.27868590027599	-0.24084069455881	3.74984780673932	-0.022334743497956	-1.72848877743439	-4.72965309431188	5.34085245524811	-0.862478215666693	-5.31843787257924	-0.996620791305232	0.352116157681786	0.230563841741286	-3.17764262379556	2.90745712065756	-3.49626572772657
GTEx	GTEX-PX3G	GTEX-PX3G-3026-SM-48TZR	SRR1072948		80549110	83.78490836	9.265080645	1	0	0	0	1	0	0	-18.9891379929385	-15.3318018077521	12.3163139950353	-17.9593081288651	1.24385436834053	-0.370058004897024	-3.58084083921739	-0.256884704397286	3.71681306414436	9.28351413175192	4.11402150384164	-3.10508624303439	3.52534250102641	0.24222847477458	-3.18820348752032	-8.92571929860219	0.178952555101665	-5.23197426204244	-7.4379164078077	6.36006655847617	-1.59903421296567	-5.14977748802158	7.75644907226036	1.61483734393446	-8.19224053113082	-11.7701180560477	3.78365914137914	-0.703719172624524	-5.71026658925518	-0.584713676943807	-1.40511210188648	-1.77500833271835	-0.193710187179318	0.43973833144103	-6.49661594177195
GTEx	GTEX-XQ3S	GTEX-XQ3S-0126-SM-4BOO9	SRR1073705		69421078	90.28383282	2.745719391	1	0	0	1	0	0	0	-17.8953004798898	-16.7297193993729	-14.6553831590803	16.6407489947777	2.01905872526758	3.0744816792521	0.928731718869767	1.93953633698648	4.04389497645134	0.403619025718489	7.01116381378998	-3.91882789830814	3.66984206540608	2.57653124667234	-1.2121871229334	-5.06444607257404	1.97239536815559	-9.34605051795493	5.08692696376741	-4.75867093971865	-0.713697555701636	-1.0357344195721	-4.18112857343613	6.39082539566748	1.23916406530316	-1.81473460519615	3.53052650272552	-1.23381669132794	-1.46497382734815	0.685259003917077	2.56592460081018	-0.0573928013292126	1.85921280427462	2.71918482856632	-0.81573565832364
GTEx	GTEX-XV7Q	GTEX-XV7Q-0626-SM-4BRV5	SRR1073923		80552538	87.35172069	5.23447939	1	0	0	0	1	0	0	-14.0576888962445	-11.9576816027379	-9.29833375098441	9.73300026278886	-0.160914774494853	-0.704785134619729	-4.43286939971387	4.56573242925943	1.30211537534235	6.89726097769462	-9.46642765399002	2.89030750199649	-5.59326688147713	0.515144813828874	-0.328434123366885	6.78227693261152	-2.79119466474229	0.141778336347686	1.27108607733347	-0.704427630194484	-7.57242122026297	-0.199943222307191	-5.18837091263888	-3.82675575529279	2.46103298609828	2.70232437844832	0.941516941736254	-0.0320597362600557	0.23972187959445	-1.3231627115343	-1.97024625967357	0.719157420177632	0.234288039486268	-0.343642382017849	-2.16156098411888
GTEx	GTEX-SIU7	GTEX-SIU7-0226-SM-4BRX2	SRR1074116		115376752	85.82802366	5.230916883	1	0	0	0	1	0	0	-30.5243384119044	-29.2645658652762	29.9441811365497	-55.5820558914064	-12.1420674723908	-16.6862796008455	10.6368712214415	5.83338333266524	-1.99298688585928	9.58409767669686	9.97448306979474	-6.71548645116931	5.56263163182573	-1.93591498801427	0.700318421095604	1.02195247254112	0.309208314665957	-4.92878324970681	0.47995450957938	0.491050770702092	5.46376287190009	6.35471119441238	5.01320881310439	-3.70195285145638	-8.11715109370908	1.57093214256879	-0.371682110385736	6.27407024564005	4.48648530935757	-0.836868969599048	2.8696661644851	-6.93256176926708	0.141952161109693	2.3476033164026	4.05735454191507
GTEx	GTEX-QDVJ	GTEX-QDVJ-0626-SM-48U1T	SRR1074478		70969862	89.95764427	4.489370432	1	0	0	1	0	0	0	-19.6920381415496	-19.1131219793274	-5.72958944104617	2.16441108290053	-4.16294208872012	-5.34919592513934	3.77430125160161	1.85116333294109	-2.59428234879127	-9.00207894529249	-4.07290605790649	3.35957941440258	-1.19014282699404	1.33293106845752	-1.07199243818937	0.254777858559441	-0.0214838957509105	-0.450489741506646	-1.72693441904921	0.266281836826306	4.85692354347565	1.17788626145645	-0.889951732834238	-1.98350310051645	0.332676115549826	-2.56664309923584	0.188373496194979	-2.26289809628806	0.169199128549899	1.7296840691706	0.0376308205489333	0.969383686952442	1.37291619956117	-0.189015423853494	-2.35186376756728
GTEx	GTEX-UPK5	GTEX-UPK5-1526-SM-4JBJA	SRR1074622		81246326	90.26756976	2.756572648	1	0	0	1	0	0	0	-20.4247585299045	-21.5987316055715	-8.9126634889779	6.00810491537959	-0.890307968214655	-2.27874478389487	3.16392446300067	5.42226452560068	2.60179665446847	-0.998259153622944	4.34590860617239	-2.30029493917025	2.36450544243398	2.2023144675733	-0.514507259078962	-5.55553504399335	2.26204554324135	-6.81269809013973	1.78453796666779	-2.15144881627892	-0.728278689224632	-2.57425407933842	1.09632438407343	1.61556656624929	-1.26577196669209	0.633128884212121	0.669319632458295	0.707070472484941	1.4178026821435	-1.01108844495275	-0.827725521587985	-2.1652727750502	4.27799721737413	-1.24829018830079	-1.19325688530524
GTEx	GTEX-XPVG	GTEX-XPVG-0926-SM-4B651	SRR1074790		123965222	86.42551699	5.974906414	1	0	0	0	1	0	0	-14.1332214281763	-6.50719605570925	-8.97955938353943	7.90588992139704	0.0853907344636654	-1.74602056564241	-7.43051953558785	4.96587278978631	0.409414648510114	6.44394583848798	-8.06656156419969	5.00794413892288	-2.3120944056314	0.377379305989739	0.918695662620303	3.05593681331344	-0.203546738861345	-0.0101095144352828	4.01116997053019	-3.74427655044222	-4.22602033898595	-2.05539652292225	-5.37157222884668	-1.31036670762195	-0.442076023447468	2.90554987218856	0.652940123465672	1.50829471919804	1.87019509414442	-1.33189771024446	3.28342471355713	-5.6531016018357	1.4958738040423	1.12989286584494	-0.861366420010872
GTEx	GTEX-S32W	GTEX-S32W-0426-SM-4AD6H	SRR1075579		77368380	89.54003948	4.963973654	1	0	0	1	0	0	0	-16.6844375896011	-15.3514872322474	-12.203707679898	13.023171389865	-1.63819969298459	-2.97891418915818	-1.62139393792619	2.14338466834207	-5.08303561432519	-4.65987671633127	-2.86741391040947	1.83270537732903	-1.18302946104286	-1.73134705469863	1.80934113623124	2.3996359946139	-1.63544537341323	4.4996464612298	-3.44559562523666	3.95000091183659	0.86204816633612	2.33810393309769	1.67683970167358	-2.94222678569335	-0.00723663611066222	-0.104589979519845	1.40050918359227	-0.107808399977934	-0.0147184923977092	-0.539543214705831	-1.4432516689523	-0.841794000396713	1.80671150003525	2.53720376691247	-0.775933882352701
GTEx	GTEX-XQ8I	GTEX-XQ8I-0226-SM-4BOPM	SRR1075631		85354840	70.59408933	24.03717469	0	1	0	0	0	1	0	-3.36793036695121	18.2180992682907	5.34968832135864	-0.901676345481433	5.42790789851042	8.25449739151999	3.49443587457519	11.5404872272023	-6.82085541590017	-0.904911157425453	0.616835520284954	-1.28164050137378	-0.146997608319147	-1.01246609370634	4.00473566243629	4.45018562974355	-0.275646628812931	-0.0523523282676689	1.22038347595164	-1.24702504110027	2.29338832448208	-2.36590038566533	0.0583380728463528	3.5841879196137	-2.82354918086473	-0.173989341673646	0.0123865956827239	0.335334321100624	0.774211283338567	-0.203027511698944	1.26058240043332	-0.0385002403050686	-0.0334113614278154	-0.746341410207372	0.206425479974985
GTEx	GTEX-XOT4	GTEX-XOT4-1126-SM-4B66E	SRR1075997		122133084	77.68408763	12.02577837	0	1	0	0	0	1	0	-2.04094891570276	19.7077121988627	5.37154385014384	1.47569540064106	7.97438780198372	14.4025687936963	10.5017928292116	12.5229280158245	-2.07170212996935	3.37993407968386	3.73117181254283	-3.14933333802822	-2.11042894830861	1.09823365719204	1.81789430790389	1.9130538060657	2.0480720435791	1.54736680051291	1.47541780475364	-1.04510785719133	6.26904574406092	-2.03674764143182	-2.44638585025411	-4.04933162545621	0.278910925105301	-1.32992900426133	1.71033114180022	-0.340452603897449	-3.03152337363673	-1.22651709989435	-3.22133324498413	-0.153606425255051	4.34919448663437	2.28993640842507	0.498120422418942
GTEx	GTEX-R53T	GTEX-R53T-0826-SM-48FCP	SRR1076343		84475686	86.14444398	5.295268037	1	0	0	1	0	0	0	-18.7415809553887	-22.0127412032535	0.611066421678143	-0.818944052560316	3.00265660854433	4.19125710644552	-4.90297499690139	2.91131689456635	1.46483504133985	-3.72949910178466	7.82344727654907	-6.60648151353209	-1.87633552116197	-1.26662661725649	-8.25333240660699	4.98968127081058	-1.21775891469811	-1.22302111413911	-2.69869697516787	3.06112447799039	-2.93947847628349	-2.11387291950371	3.9574128237502	-4.92453662923656	-3.42733142067976	-0.571313193781243	-0.123559262454414	-0.100907436988672	1.82961842623116	-3.78246961585792	-4.61629625024021	-3.82295193992089	-4.33465226043605	-3.0896124775041	-3.88436833762251
GTEx	GTEX-XBED	GTEX-XBED-0526-SM-47JY3	SRR1076779		75212730	62.92787404	28.94762363	0	1	0	0	0	0	1	-0.853245130541793	20.8245247810319	0.739311678168668	1.69276886784429	-3.30053829521433	-7.4918542474219	-2.30491841756398	-2.38669353298727	0.728124956177752	-1.18981315146554	2.02807625990165	-1.92259837292027	-4.56823216780551	2.24458437940973	3.2546661539842	0.409482486399281	0.433836425169986	-0.0844747645479444	-0.744388080220555	-0.420065073073503	-0.403028660901904	0.826084287635118	0.426182110628868	1.82550214014594	-0.898062309111267	0.319133595254194	0.327411164001952	0.294846482590912	0.482670812086503	-1.54138086076319	-0.609494631132564	1.13719427321	-0.0454185093740241	0.651436859602152	-0.847666213200899
GTEx	GTEX-RU72	GTEX-RU72-0226-SM-46MUD	SRR1076916		77574316	88.78540676	2.873505195	1	0	0	0	1	0	0	-14.6740624252287	-11.6368022074547	6.04642446777994	-0.793885769113688	4.36152393609796	13.3586851687737	0.0790527051416459	-18.0205952098667	2.93952603151015	3.26826165115709	-7.90445533943813	3.83510042973649	-2.66995945236623	0.525309137493639	-0.405510316497533	-0.817279969592773	-0.494268432359804	-2.67249429116092	-2.34864409631173	1.04704240186478	1.52143314994239	-7.92045338553847	-1.93141682779438	1.98777817018024	-3.4665753761927	-2.86147377126612	-0.118990837319721	-2.7908393810253	-0.868686136250341	1.41625127281595	-2.95935228299249	-0.913281822395622	2.25975461767674	-0.626160665048121	-2.96223464104064
GTEx	GTEX-SJXC	GTEX-SJXC-1126-SM-4DM6Y	SRR1077090		91329380	84.63855114	3.826313066	1	0	0	1	0	0	0	-30.0602134939415	-33.4865276625831	16.9037283925501	-33.5635051625638	-10.9224634990039	-7.15754861376724	28.3276410552773	-13.3382172006634	-1.85652717109415	22.4532111207766	14.9612484120105	-10.10339205853	6.17507747511941	-2.87189062040869	-1.29833147447713	3.48407274407545	-0.705656986095278	-5.77806575732823	-2.55516207903747	-2.6730258764234	4.15163273295711	2.59908348169918	-1.29354303871943	8.46262620684948	1.78221373902998	-1.27216436565111	-0.27863317951981	-0.183200847951211	-0.580345363144326	6.23170148138139	5.27984884536918	3.01795498297102	3.98059123899626	8.12213752759845	-3.53810409667138
GTEx	GTEX-X5EB	GTEX-X5EB-0626-SM-46MVQ	SRR1077115		77941936	70.65453955	23.76072619	0	1	0	0	0	1	0	-3.24030841654076	17.4583165684734	5.47370060798281	-2.4034314142227	4.60555226713059	6.16979858626027	5.37237586558565	11.0302444284431	-9.79920223794607	0.398151593851704	-0.930796746262238	-0.211136203275084	-1.10939273838755	-0.901380474840511	5.46254325452049	2.28046206363291	-0.711672769018023	0.732512665258828	0.189745239177535	-0.457640572380297	1.28455344956698	-1.22180694231818	1.1941517167592	5.17114121626632	-1.69131608506501	-0.987991408960208	1.12843103222827	0.636545198480107	-0.148829775401635	-1.34069087535139	0.144543894332468	2.13488092144867	-2.0587849974626	-0.386553055035946	-0.165217209619852
GTEx	GTEX-XGQ4	GTEX-XGQ4-0526-SM-4AT6C	SRR1077528		83490792	61.06833434	33.06810888	0	1	0	0	0	1	0	-2.04115714516891	20.9597829296917	3.40066910332989	0.219042358541541	2.87945630632444	3.68390894514502	2.95390736307742	8.51195107859277	-5.37477039702268	-0.6487655332604	-0.608804888161496	0.691389080133291	2.00580109286095	-2.52482564027687	2.90592513503756	4.12156534633812	-0.606278661893782	-0.766342746648096	0.483109383127114	-0.492181697375173	1.76435277310491	-0.986383431318203	-0.281563297534788	3.42976702874413	-1.14069601524065	-0.0006166198035546	2.32916570782077	0.790467526966255	-0.585984516437817	-1.46446121015959	-0.342004837007852	1.62634688185312	0.504110226017826	0.885867034973085	-0.0978951923533189
GTEx	GTEX-XV7Q	GTEX-XV7Q-0826-SM-4BRV7	SRR1077643		82917376	75.89439637	16.09966046	0	1	0	0	0	0	1	-2.89361357080731	12.2482348588728	4.64217909200617	1.03203461035819	-2.13908127433349	-0.109566615782099	1.20276115480249	-12.5381699247732	-1.13621325521273	-4.60348373914365	-2.04893561200948	0.371016457316378	-5.62121201576504	5.8696506551256	-0.603754273631665	-2.24510484113594	0.39724470391421	-3.52947063565663	3.21486774779227	-1.1424020141063	-6.06520267106596	11.865828572913	2.34507465314445	2.18347632452324	-1.57854219693448	-2.51050101068379	-2.34620599084109	-4.56604832237229	-0.0513606465547156	1.45865240547556	-1.45233055351078	-5.75783014845108	4.9421213841045	-4.72743255708226	1.89403549641104
GTEx	GTEX-WFG7	GTEX-WFG7-0626-SM-4LMK6	SRR1078465		106536906	85.54285404	8.12366937	1	0	0	0	1	0	0	-14.52754139111	-6.68056200547674	-3.61964170387552	2.38503460998055	0.563149253294707	-1.32801995351803	-11.2684256417973	3.59513321489576	-1.06021702117157	4.22351290501403	-7.92315118737355	4.19881574276315	-2.51600993069121	0.207717949625002	1.16793810914527	3.26863265821948	-1.30624924383798	-0.590435976372929	2.51247950090406	-1.7932957107833	-3.3406436008645	-1.58353324324148	-4.56760189846793	-0.398421930397778	0.162932669037724	1.68162026547483	-0.284409939734709	-0.410209341321121	0.323593546357258	-0.789818705867258	1.92877945887703	-2.59933243816963	1.86239551956332	1.05995940955747	0.975580531266232
GTEx	GTEX-WFON	GTEX-WFON-0526-SM-4LVLY	SRR1078586		75993114	87.53289147	5.371431417	1	0	0	1	0	0	0	-18.4680558226983	-16.7872447072099	-8.22854180314569	4.75044391133944	-1.23289551202878	-5.71702114816472	-1.97894266994528	3.3634165522562	-9.7487965903214	0.883616998747551	2.10562021194016	-0.087202211399631	1.56589418444239	1.00847043964722	-0.389395698701371	-3.01926607902645	0.0677955418912606	-4.20629686741316	1.75880088426573	-0.805595820343642	0.584479285383837	-0.303063867346154	-0.396873739058502	-1.07704219079796	-0.196049499480567	2.36271366341342	-1.78801889991225	2.56495457061551	4.11770118549643	-2.69671397235664	-0.894492561124974	-1.25247095573234	0.375655463045437	-2.25407355151351	3.68450347788756
GTEx	GTEX-UJHI	GTEX-UJHI-0226-SM-4IHJL	SRR1079023		87339300	87.77679693	5.911013713	1	0	0	1	0	0	0	-18.5374768918255	-16.1701239671735	-10.5213577967707	8.44938118506771	-1.47371539996293	-5.48224667550662	-2.24223348463648	5.89545693949812	-7.01384676858482	1.16957471815873	1.07658751068808	0.692956135115535	-0.00900201923470523	0.977011890629603	-1.5069387051397	-2.4930088347828	-0.256050262054003	-2.8803438405596	0.580310775106214	0.342581194232779	-2.60225245245652	0.861521063732878	0.0234777748050827	-2.50898344087391	0.81397062933517	1.79077252716808	0.425882394162797	1.17249063729171	-0.370275648306443	1.1214840482747	-0.194846134106122	0.830961571301243	-0.108086243558188	-0.744532246483802	0.144825347947643
GTEx	GTEX-SE5C	GTEX-SE5C-0426-SM-4BRUI	SRR1079189		87723804	88.36600383	4.452415219	1	0	0	0	1	0	0	-15.7276754633702	-13.2176225316221	5.62900548873313	-6.19901661412479	0.783992726029594	5.31320888462313	-10.5971791118948	-9.40566699456877	-5.26968244778482	-8.64821114734705	-5.81661477542304	2.39441898594825	-4.16903579226251	1.39575750049789	-1.82938930264436	7.0260379169485	-1.62573920434126	-4.70235254203415	-1.19983537917933	-0.23774897773813	0.148721598115193	1.49323336020522	-3.47210575663233	-0.573055448339399	3.65433556141959	0.726501368081701	-0.251822275171429	-6.89675288071898	-5.64854395460611	1.91437347184785	-4.73646468148242	1.39640096955412	2.86055630359283	-2.91694390139373	2.432833280045
GTEx	GTEX-R55G	GTEX-R55G-0426-SM-48FDH	SRR1079404		151909950	88.79127272	5.474765807	1	0	0	0	1	0	0	-16.5930595942359	-11.480439556172	2.79261867857513	-5.46964016970114	2.04111395543528	0.878955670927296	-12.8749007347837	0.365321639446272	-5.24228057306272	5.31237841502049	-10.5071038785724	4.42212304817532	-5.34843225779854	1.23680163720995	4.81983987167819	-2.23680732827491	-0.880094161113306	-3.33633411826909	1.98644398214524	0.246417198869237	-6.47765628565963	-4.25122030283121	-5.9487931959221	-3.01363735098361	1.24324701637005	-2.07904794948326	0.102203571746684	-2.65857499289363	-1.95883251926659	-2.11969320869751	-1.90757522550172	-2.77562246364662	-2.38506808453271	0.992803086676568	1.935798463929
GTEx	GTEX-U3ZH	GTEX-U3ZH-0426-SM-4DXSE	SRR1079502		81614488	88.94360766	3.837735281	1	0	0	0	1	0	0	-18.0303310915393	-16.1771630180697	0.825149619905345	-6.23726959371446	-1.94128437752876	-4.47194325758122	-0.924538678669217	4.53526810060179	2.35013398493003	7.78732944598276	-8.5742351544884	1.99457353108476	-4.10452561662423	2.58678590093312	-0.840884219769006	0.397072863451175	0.231102526023758	-6.67303479489621	-1.89234135938454	0.667036862788168	-4.17872318719801	-2.69358801558422	-2.22819827988736	-2.49695885587025	1.22630723188545	-4.33243113615799	2.21224327668178	-1.89526868856595	-3.39110768676628	-0.43554260046836	-1.24054926229812	0.59387629518587	-1.03693450691931	-1.60357275982075	0.406532434687649
GTEx	GTEX-V1D1	GTEX-V1D1-0326-SM-4JBIY	SRR1079998		86153752	86.00538953	6.313013506	1	0	0	1	0	0	0	-24.2740135458048	-25.6332913443513	6.24673520327904	-17.7464319669468	-7.38743258536487	-10.032948177054	11.7914163558994	-1.49924646165149	-12.8433388944035	18.7356507188105	8.47823971868411	-7.32177785770555	1.94488499938012	0.771125192833601	-7.52304886528372	2.85588462484896	-0.403009860587046	-10.783035784285	-6.39311480780616	0.939948205995172	3.63811175650722	2.70279428499095	3.42804320117944	-2.76934249663486	-4.0369842430141	0.854061163625254	0.827290117529838	3.82993654234488	4.35235710315166	-0.869951933808577	2.6041896182895	-4.11434443217683	0.892839873156743	0.536191842216201	-4.94424351449189
GTEx	GTEX-S4Z8	GTEX-S4Z8-0626-SM-4AD6J	SRR1080148		84000968	88.92236813	5.097338878	1	0	0	1	0	0	0	-17.3082318555951	-15.2885013172663	-7.49438805911858	5.44155986948996	-1.90505026082049	-4.09640200720685	-1.68063298233233	2.00761574426359	-7.42201851719339	-0.581755341177626	-0.970681054418963	1.54929529314652	1.06721480458963	-0.887106405789664	2.03291948416826	-0.494863545142213	-0.285873676587221	2.20740806110798	-2.28967937446716	1.78495110940877	1.204487864143	-1.26143306387794	0.771141089320248	-0.95871688652062	-1.83163540246338	1.01017941226528	0.791022204590554	0.393410790791011	2.04424907481835	-2.97619620657467	-0.796642388575943	-4.92576503463479	0.544367394830298	1.13325476658841	2.69738359230188
GTEx	GTEX-SE5C	GTEX-SE5C-0626-SM-4IHLJ	SRR1080415		64195332	66.26976865	28.89264285	0	1	0	0	0	0	1	-0.154106257363277	22.1104441259172	-0.186453640171458	2.09456553307886	-4.12697340917591	-8.94110511281095	-2.32881473218952	-3.03062028990163	1.92627887289069	-0.846956456122828	3.22946067054631	-2.12642170406015	-5.21610528915081	2.30596737764397	1.9807994785844	-0.236310693379332	0.531447663459225	0.438647408791709	-0.593875932615086	0.193967996093313	0.28578016344526	-0.639371739390998	-0.670314340355433	0.497361824940198	-1.24102019529697	1.37307103264039	0.720672616153592	-0.524601280867448	0.415129935443109	-1.71284870347613	-1.86988276469016	2.35642663345406	-0.490058759155445	1.46896844172181	-1.64232106790114
GTEx	GTEX-XBEC	GTEX-XBEC-1326-SM-4AT69	SRR1080977		83807852	27.75703164	65.32816997	0	1	0	0	0	0	1	-2.59642488613534	17.9084542739106	-0.928406348965689	3.18115201101855	-1.94654901432277	-7.26223713834919	-3.02476501426898	-1.54683506419814	1.98455131466911	1.9703503275903	-3.09436406962549	4.16475173906968	9.74247603864388	-4.49742503508649	-3.91685240440015	0.492872309630997	-0.523403671955868	-0.516701637035928	0.108030335981845	1.23965034756609	-0.071405987832379	0.860180257162067	-0.521322052922115	1.4535229981939	0.413016634881225	-0.1039707452542	0.106145812785361	-0.347576448448756	0.617603207828685	-0.659631354794949	0.162109810729874	0.0482591897885976	-0.891277622607724	-0.220538460390004	0.20963123619684
GTEx	GTEX-UPJH	GTEX-UPJH-0926-SM-4IHKA	SRR1081137		100226682	89.32068808	2.0970344	1	0	0	1	0	0	0	-22.1972564593918	-22.2794203430502	-10.8869555803859	9.84325346901609	-1.30432600997173	1.82580752160323	7.81823702217724	0.228936839708068	10.6133277753474	-3.5538136897518	4.29691285686736	-2.67478891946266	0.522650704857076	-0.840091125389765	1.48387360333551	1.5227162583145	-1.49831721370241	-1.20351008946685	5.5202994995087	-3.79183884682861	0.208308591329466	-1.12273233294177	-2.30443152560326	7.5140248621187	-2.33921194069173	0.62559174557598	1.99545847135318	-0.790033766741159	0.785842335839337	1.23769763627258	2.93156638099974	0.120322905089174	3.04153893601838	3.14532967763231	4.83542466140488
GTEx	GTEX-U3ZN	GTEX-U3ZN-0426-SM-4DXSH	SRR1081473		76845566	87.77500318	4.828382681	1	0	0	0	1	0	0	-18.502546048275	-14.9750518816878	1.16814963888964	-5.4074817690311	-0.121731777014237	-2.82737867679664	-3.49028875064415	6.14668179134183	2.13368965569377	10.4937421462694	-5.69661670146113	1.22334248685742	-3.82013800370372	1.15776581476254	-0.353929329883245	-1.05938151567411	-1.23828487493633	-0.747806398675259	-0.487875352756332	1.04289140793632	-7.82068568672565	-3.61051329389471	-1.38750832053242	-2.25777768450512	-0.843019771934384	-1.54469965428256	0.522451006741592	-0.0314686178232436	-2.60635503170897	-0.987001384294881	-1.23274532385088	0.825931905444632	-4.50053707131706	0.639962948206784	0.11925515577156
GTEx	GTEX-XYKS	GTEX-XYKS-0426-SM-4BRW4	SRR1081519		82631726	87.49929779	4.875805208	1	0	0	1	0	0	0	-19.4104305242874	-21.1956189397602	9.13986470031503	-10.9512502448406	0.291085982871181	0.772566160951598	1.32784234742751	-0.323243426225057	-0.10650696200345	-10.8768180306918	-3.15694133062475	5.34002181823637	-2.23188365741476	3.7815546915424	-3.61506700169911	-5.99527503157772	0.987809728234917	3.57094056709447	-10.7823691834801	1.81614086345111	-0.488105368875644	-4.06430761778835	-5.4203388762183	1.31405702141783	2.04600664440189	2.82470344270309	-3.02875851638977	-1.96565930071261	6.22915666161309	-1.07772304627818	0.793458533801554	0.507039776358945	-0.571584443167233	-4.44448335755685	-3.02100465774864
GTEx	GTEX-RTLS	GTEX-RTLS-0726-SM-46MV4	SRR1081543		66537034	87.72499237	3.986700098	1	0	0	0	1	0	0	-12.777013429294	-6.08205195298454	3.80034711581344	0.865070382661957	5.79725556979453	9.93710050186491	-7.20075780165587	-3.98316209347596	4.29782008036291	4.56298703075587	-4.22065739773304	0.541544818107603	-2.25589081506614	2.49668560548935	-0.713492462841836	-7.85123678753972	0.758072924368315	-2.05600530909706	0.622902320712903	1.91512914752382	-3.25751436699624	3.3371373051025	-2.42038238185628	-3.96549437736965	4.612708874602	-4.01033154462073	-3.08731143072585	-0.90021952198983	-0.921016609146324	4.65497496977928	1.72489101501838	8.11568577666416	-2.24293560202766	2.38073930295361	-2.8332288654667
GTEx	GTEX-XPT6	GTEX-XPT6-0326-SM-4B66V	SRR1081910		124354900	86.22627657	6.029179389	1	0	0	1	0	0	0	-19.1559730581011	-15.7685160780421	0.71593033161353	1.15322299972042	2.8388935028924	5.55549941142562	-6.55080207427761	-5.23566436417731	-6.69442157797944	-9.55714706046135	0.601610999577402	2.48235081699588	-1.4469018844659	5.38599070960111	-4.795112033192	-7.92567072422948	1.14263236124551	-2.86485903930775	-3.72834378213119	-2.57368823965899	3.24348227186131	-4.26255661646893	-5.6701344250141	3.28850554811413	1.17645202139286	-0.330337564917765	0.251723122886256	-0.398295526030147	2.39041749641119	0.986652550381739	3.73964607724579	0.0319708364186451	-0.47180037638597	-0.453777962873797	-1.54613170694096
GTEx	GTEX-REY6	GTEX-REY6-1126-SM-48FDU	SRR1082283		68913914	86.72097771	4.785828882	1	0	0	1	0	0	0	-17.9760183759565	-16.1555948686953	-4.13181229236417	7.15218901192072	3.28983465837658	5.78315683381186	-3.72593182136668	-8.60710886734976	0.112077021151168	-5.27377695279263	3.60142830325056	-0.160549439586484	3.7350351896338	-5.96946498779594	15.7101369543604	-2.61464908868093	-1.14962766839102	-1.35358119006504	-1.17270948863055	0.59891968743026	3.02138820416091	-2.71317087246413	0.823522826109167	-1.5502834639137	0.265508247301196	1.14336554001479	-1.34845729888158	-0.490071365287483	3.91006694265711	-0.913593303325795	1.48722911987662	-2.50002140860599	-0.622536127115152	0.623578608654804	0.479414231889446
GTEx	GTEX-PSDG	GTEX-PSDG-1026-SM-48TCV	SRR1083076		69562196	90.35196934	3.603785021	1	0	0	1	0	0	0	-22.8576751993174	-21.9034256450684	-0.989516051644857	-0.690872814526182	-0.0433264075480788	4.66809361581191	3.36948568424669	-5.20142714974843	1.65512284846253	-10.5450581831161	-2.58470854428634	4.13548809616635	-2.97705499378397	1.78651205999943	-2.76213455227661	-0.417022558753232	0.0260651267126064	7.19716805521176	1.08803365297156	0.63981181262393	3.22855148317304	-5.98109112609856	4.37413986600012	1.15880053092913	-8.71298991361632	2.29572756017852	0.918019700131888	5.5346233837559	3.74871885314645	-4.15124335190079	1.67837145285118	-4.14427447267657	-1.32320871782408	3.01081451027761	2.79642635355209
GTEx	GTEX-S95S	GTEX-S95S-0226-SM-4B656	SRR1083286		76247336	85.84475397	5.778455001	1	0	0	1	0	0	0	-18.3989737954475	-16.2865489086298	-6.01828356542306	3.4217038015267	-2.71356046312947	-4.2921623967673	-0.19495942166115	0.562517997163686	-7.17934955917051	-4.01073969138811	-2.56260953769654	2.45957840965531	0.329865607209153	0.956602916755218	-2.27202956370463	2.03171576148332	1.19928916646976	4.22626938764865	-2.09181250447978	1.86055385887415	3.10280111956544	0.774535791425475	1.07392759071874	-0.444680812075718	-1.19569367385387	-1.99573852938008	-0.413410071959763	-0.538425715174631	1.43933017005811	-1.42972564909829	-1.28133297187722	-0.744522916593101	1.55553368678621	-1.55603265122588	2.09122016286906
GTEx	GTEX-XQ8I	GTEX-XQ8I-1326-SM-4BOPV	SRR1083604		84783952	89.6554598	3.617904011	1	0	0	1	0	0	0	-20.6323273193557	-18.437138931259	-7.07288166642675	5.51819166158687	-0.346366778583372	-1.53520213753193	0.730235282119453	1.61035421939843	-0.349813462918143	0.652163160378068	2.70102862467363	-0.659994896735607	1.69919365412866	0.270513056556327	5.50556718146651	-2.55681574325307	2.27875880325505	-0.0651556172369359	2.35813943518993	-2.29059143424682	-0.0364984067972785	0.874538746614929	-2.7252474917496	1.12346650142892	0.254846726075869	-0.817840654682236	-4.75990766061146	1.3254553131404	3.71119332579923	1.92340723747351	4.23433704903126	2.12732013333611	0.929565021396689	0.0650122921251559	2.7157846848212
GTEx	GTEX-UJMC	GTEX-UJMC-0626-SM-4IHJQ	SRR1084276		89298966	88.96822613	4.106591783	1	0	0	1	0	0	0	-24.6608361134427	-25.5991649347813	-0.977481621342076	-6.41665210269869	-5.4656306927457	-6.02630844412709	7.73043540203036	2.34917374815087	-7.47080471740312	-2.87466426235191	-0.325928045701614	-0.765600333422221	-5.2807996395791	3.70820035472973	-12.4829510220988	5.66765096778703	0.759349310336498	3.5146635145826	-0.366164652579373	-0.486889485571964	4.25028886645996	2.99689579233276	0.710242479238611	-0.215787007723352	-3.04940214377283	-0.0827400496711388	-3.21811334973733	1.40817685898935	2.82828346765158	0.29812111677234	3.45047014355582	0.875365420722818	-1.2788803237282	2.22060746891224	0.0425025967283017
GTEx	GTEX-T8EM	GTEX-T8EM-0426-SM-4DM7E	SRR1084460		71612420	88.53863059	3.725320273	1	0	0	1	0	0	0	-19.9891068893485	-18.2284173599728	-8.55425191476685	5.42490259681314	0.00953069903456926	-2.27075880540767	-2.46047111093592	3.08325567086716	-8.2350850144961	-0.574925381442016	3.66303688504954	0.131421411296012	2.435178274489	4.24565953776853	-2.55333285452697	-4.98948847180956	4.56774778364886	-2.77642561617184	4.91161086289822	-4.26662086748955	0.65361386820203	-2.77953495895591	0.0330125838952808	-0.215728811005604	-1.59309439526809	1.58443811253976	-3.19204102984545	4.63832374421098	5.27730155530705	-1.55493661773034	0.67906121731606	-2.42214016639628	1.27888739603736	-3.54224793451138	0.0789722782852844
GTEx	GTEX-UJHI	GTEX-UJHI-0326-SM-4IHJE	SRR1084626		72595058	85.71676601	7.740890571	1	0	0	0	1	0	0	-16.2451280063622	-11.4854153669847	-2.36989177412619	-0.580984741235012	1.06535511968544	-2.17388832031221	-8.42533570055525	6.78743711577826	-0.151300892751282	10.3684802838703	-6.69113849946174	2.23471049198444	-4.15745430305945	0.557858747273014	0.347058068216921	-0.816833971043322	-0.964142178770548	-0.688710334032605	1.11997464293836	0.0132162303325179	-6.63677420667763	-3.40571127508484	-0.979502073982054	-2.18852625555168	-1.24302003572125	0.497828254581222	0.633936184581064	1.00664948021085	-2.19300646410072	-2.42804337167567	0.234971905876699	-2.70448217875189	-5.71712341249004	2.54797471020062	0.59451449429771
GTEx	GTEX-XQ8I	GTEX-XQ8I-0126-SM-4BOPL	SRR1084965		59519330	54.12927195	40.04000381	0	1	0	0	0	0	1	-1.72910515171619	21.4500958102752	0.0445064174106079	3.34384826332853	-2.32384139072381	-7.35448712842936	-2.48942756721449	-0.917549590655177	2.45153265504815	0.555674304401248	1.32916641747754	0.165047240570187	1.53111524200814	-0.659497285512966	0.71499072617467	0.78802365994297	0.577032839389288	0.666370297797445	-0.552342766016929	-0.195486602858733	1.69280849397275	-2.16885637524307	-1.87645243907611	-0.0802943213680156	0.0104617383200959	0.601932155108996	-0.386808179524621	1.07073750671979	0.76925012451597	-0.598347265094017	0.108054400506744	1.21117916481163	0.821510780227986	1.44248538851226	-0.198702095187144
GTEx	GTEX-XUJ4	GTEX-XUJ4-0326-SM-4BOP9	SRR1085159		78648168	88.06080518	5.942508413	1	0	0	1	0	0	0	-17.1491708906451	-13.7518846822002	-8.77651890666126	7.38631452699779	-2.58770151018064	-3.61488407866362	-0.497083254854747	2.2782695847892	-5.58374965036924	-6.77161323240267	-4.12925961324068	2.92645029915935	-1.34152262179088	2.76810560456367	-6.11724188272186	1.32693759591427	0.945571765527107	0.881649508385382	0.959142016658858	-0.850098124878895	2.36880196963698	5.30535499615935	-3.6212520205891	-0.8865448971974	2.50605555342422	-1.92029493614363	-0.600060238382451	-1.82296880570625	0.0385516653809521	3.11080331942923	1.76880502769228	3.00347917978497	1.28452629758631	1.95065144866775	-1.38964988114734
GTEx	GTEX-XUJ4	GTEX-XUJ4-0526-SM-4BOON	SRR1085925		68819616	68.30509197	26.7273854	0	1	0	0	0	0	1	-1.43952871295582	20.9031322392518	1.0703518527575	1.08788334629336	-3.81146717780703	-8.8502155989964	-2.72272546623249	-2.13632162377045	0.515906007240906	-1.38766556099759	3.31484707106943	-2.73043589391189	-5.56859063981531	2.46087525815201	3.21915484829328	-0.499800017643644	-0.232654096720807	1.10045946203618	-0.331985697131321	-0.383103083874381	0.0741375526862381	-1.66033148654475	-0.0908676034839454	1.80539281706447	-1.03323501688423	0.189964812823036	0.171757855550609	0.283610965944953	0.726588174052794	-0.563159749627443	-0.510063040033637	2.59595228293883	-1.42880636949614	0.697287437680103	-0.770692529340529
GTEx	GTEX-OOBK	GTEX-OOBK-3025-SM-48TBP	SRR1086140		64340390	88.78768686	4.037920815	0	1	0	0	0	0	1	-15.3700122154299	-11.5614963269658	1.9023116148806	-2.80176982184773	-0.422387179612289	0.484221714923478	-4.42779796519041	-4.09772699897566	-0.760461655271256	1.23844206303262	-13.7038501622138	6.17954120611692	-4.32672808082709	0.323661953377217	2.61371617202222	2.10120014743693	-2.1647991270475	-3.99631313442932	-2.53259357530111	1.54428145692102	-0.473388159289981	-4.83936888286048	-2.05386603089091	-0.425776592590075	-1.85550479215311	-2.49882004692508	1.5330218072805	-1.41976707112668	-0.107831026500469	-0.917689097103884	-3.71639692770934	-0.957503174386333	4.13837611498022	-2.63940335145782	0.502950991913838
GTEx	GTEX-PWOO	GTEX-PWOO-0426-SM-48TZF	SRR1086280		97516632	82.53835715	10.83499684	1	0	0	0	1	0	0	-14.1127152686212	-7.43045637124061	5.71718734694182	-7.02150903774297	2.82200068557583	2.69758041733127	-11.45914483358	-5.71784957487978	-3.08198619086763	3.91040371317121	-7.17090313864682	4.76746513309047	-0.637684597265115	0.24281264643923	5.9680256621464	-0.910452134402906	-1.44221873213139	-0.540973379468214	0.15419892224184	0.164438819030914	5.06657913991457	0.232845917954682	0.419077687331755	-0.0974965388562137	1.12128973441596	1.35052083768202	2.50857804464195	-0.906873614115213	-1.22747085413415	-0.906076073227171	-2.70508328558839	-0.369683626055844	3.32390341850039	-1.25351731367101	-1.12533762514627
GTEx	GTEX-X8HC	GTEX-X8HC-1626-SM-46MWE	SRR1086304		65974006	56.37328738	37.7411158	0	1	0	0	0	0	1	-2.99327229144914	16.1324724974965	2.28921971578462	3.18080320723755	-1.68116911336563	-1.60156626207027	1.03439044110259	-10.66639242289	3.95763460920049	-0.789029131177062	-0.0429381753027367	1.55648645116642	1.58955726915582	-1.77027983313381	-1.70783787140974	-1.42176143665082	0.48366155599858	-0.74544151240233	1.66952549260147	1.86105815375416	-4.23072679731243	4.74710522534489	-0.512708207460968	-3.68071436429849	-0.981922373704869	0.235438031589831	-1.09305855533198	-0.260720992811779	1.09435359784339	-0.560714900637581	2.18385548836684	-1.54102458657357	-0.452969037954707	1.46653303529357	-3.01970811209135
GTEx	GTEX-U3ZH	GTEX-U3ZH-0626-SM-4DXT3	SRR1086349		85672166	89.38072839	4.07107718	1	0	0	1	0	0	0	-17.8768492023129	-16.8594024059423	-13.6652124419552	12.495785015321	-1.80532273039406	-4.81267243674253	-1.69329656177543	7.59737120448785	-5.19880301897854	-0.703673690765973	0.501072440147924	-0.516911034469285	-0.889137808770839	2.45136572212079	-5.2284291872232	-1.4762243227664	1.04133625554647	-3.66154979209944	-1.27925217550543	0.468608738389145	0.0431006129983899	1.80372600278706	-0.493077340915769	-2.03502529927584	0.270309391862624	-1.03384488531319	4.17036240493956	0.869242906080649	-0.853338637594617	-0.357411251415465	1.76772146396263	-2.41761534420576	0.557210021253532	1.48595454469266	-2.84811011977815
GTEx	GTEX-QXCU	GTEX-QXCU-0926-SM-48FEP	SRR1086393		73496942	88.2698521	3.186233245	1	0	0	1	0	0	0	-20.3786272561744	-22.3170632890012	-3.13033885753331	3.277428980465	0.341499381054254	1.3230953581542	6.8680505786827	3.92875552828123	9.16860893346704	-8.51252697182462	1.30802347622393	3.12250384119343	-2.21862599055288	4.15924037781187	-5.35173945444499	-4.60557049503969	-1.07353943800281	3.32604370985468	-14.2309100878607	-0.395396910174345	-0.123816087631107	-2.0543384896075	-5.25430614796236	7.68089472138434	4.14012651585526	5.1803414097385	0.357676752355789	-0.726391002524447	2.11089148969267	-1.74106233988189	9.26835165926612	-4.89861573998014	-2.95765330521642	5.32744492077466	-2.29277120402926
GTEx	GTEX-POYW	GTEX-POYW-1126-SM-48TCI	SRR1086820		72848934	90.05782569	2.118216308	1	0	0	1	0	0	0	-16.6706374176807	-12.5483036610478	-8.27680275390859	8.45463425863041	-0.125319939232451	1.28297442877483	-1.36630016142378	-4.51988586652461	-0.723178330337762	-1.54503187006168	-3.20065360526569	2.87072157602035	2.00405370392368	-2.71561898252926	7.73264641188235	-0.651660279203108	-2.04987627054795	3.68061239783958	-1.48178618472068	1.54746212263294	2.96477714481373	-1.23951571835589	-0.395499352711048	0.592751182364989	-2.40679595514951	-1.86262864332696	1.45976686841774	-0.892905531473569	2.14221881483805	-0.362449559785016	-1.82590271148454	-4.98640667911924	3.95921081629694	1.966421750279	-0.494161351733355
GTEx	GTEX-XPVG	GTEX-XPVG-0826-SM-4B654	SRR1086844		138367466	55.79761358	38.72613523	0	1	0	0	0	0	1	-1.42932611328744	21.6379900390388	0.115273739582815	2.69597401925628	-3.16476989959258	-8.60864133293759	-1.99325570510457	-1.40128063722055	1.56203608244	0.202382995660626	1.29676253195752	-0.876278796880013	-0.712697900141754	0.153813597776774	0.894980521724854	0.615780484368377	-0.231573058131049	-0.0928933665344247	-0.810183918829766	0.104813855092203	0.93064117411239	-1.19432968188161	-0.674934963556574	0.754383066936707	-0.0831511154744632	0.364871971000457	0.502613936211657	0.245799620589099	0.107266281393389	-0.692884151677217	-0.0249711839450304	0.631248867300737	-0.525333314649849	0.77142174119785	0.0239402784329455
GTEx	GTEX-XQ3S	GTEX-XQ3S-0526-SM-4BOQA	SRR1086889		63424946	75.40038899	17.919208	0	1	0	0	0	1	0	-2.75548987692013	17.4832553688798	4.45136756009526	2.55038568942645	5.73010177606132	10.8378274600391	7.83061038144996	7.30348156209335	-1.57108160517861	1.46274968633463	-0.291725326934122	-1.61897492909096	-1.12711111197542	0.641351114612695	-1.23628038833332	1.43675803535054	0.779666375084923	-1.68894482505493	1.03614802673667	0.551428784293197	1.28448866417992	1.32618354443567	-1.12236187582484	-1.59674539852239	-0.894342725698693	-2.91605357890497	-1.06505451408543	-2.6552282834983	-1.11652584501986	0.0164437619851454	-0.271278880356078	-2.15350850311072	2.63334447965436	1.3296301254317	1.69091864750268
GTEx	GTEX-WFG7	GTEX-WFG7-0926-SM-4LMK7	SRR1087173		93311926	87.6910139	6.588439724	1	0	0	1	0	0	0	-18.8196479277094	-14.5405456358296	2.83496319711937	-6.34026323956504	3.17687270752092	2.48291982306982	-19.9514277521419	0.686654750959287	-8.51313069777569	-11.7071995933534	7.26552090088149	-3.66653906968959	0.858616835111459	-1.43629924083144	-0.991367918890049	3.19929769855883	0.296963532399964	-2.856920337048	-1.01795893259434	0.651604313906865	2.20560246331569	0.505025722559132	-2.1366511175845	-1.01308807477534	0.789068841285958	-3.46082906831859	-1.28527115020603	-1.38975916438158	-0.723951804255	1.78956194481239	1.19733890817908	0.237733072866126	2.59382638843784	1.64478665276405	1.03757344753789
GTEx	GTEX-P44H	GTEX-P44H-0726-SM-48TBT	SRR1087197		79759902	66.3730304	28.39085234	0	1	0	0	0	0	1	-4.47717945202477	17.152344684155	2.96193813986795	-0.419995910778236	-1.08981820561678	-2.95684332268839	-0.7742568787562	-5.76484705529247	0.0492960598457485	0.489641545128914	1.21159040751454	1.00132463227306	3.21823028812118	-1.33011334059331	-3.21658392575893	-2.09827698602312	0.960946695844207	4.31446709961948	2.84719771887456	-0.143351245754997	-1.38214386775638	-3.28792754458067	-0.873127496027202	1.02615823621414	-1.47158496485901	0.463256921481341	2.73927439805116	1.73882888438398	0.643264868866453	0.0980427203151468	-0.918539209778081	2.92150507836316	3.86939594826357	3.00126327821972	-3.31130534627637
GTEx	GTEX-QEG5	GTEX-QEG5-1226-SM-447AR	SRR1087415		77147484	90.99631298	1.770826382	1	0	0	1	0	0	0	-16.7869391679194	-15.1849842692828	-8.78815482273735	11.0595667933918	0.609447855387621	2.77628306017174	1.10772208234122	-8.84582023960011	-1.70806168370866	-3.5291183747981	-0.914640543626763	1.79428417560111	2.98785908129565	-3.82087568519658	13.094239669071	-0.516570167274194	-2.23143500871228	-0.583314486150044	-2.09018867382524	0.881296833733775	5.73294315422652	-1.60709755605017	-1.97495211861283	0.789177139789642	-0.854637246250927	-0.804056303359952	-0.684516938575832	-3.83400564996648	0.325578459615335	-0.385966864689521	-0.802236610134419	-3.45091242386879	2.06546543667974	-0.456679798221918	2.21806980331383
GTEx	GTEX-R55E	GTEX-R55E-1126-SM-48FDZ	SRR1087875		84935562	87.58119714	2.298191657	1	0	0	1	0	0	0	-21.5165587119698	-22.3492661283331	-15.3618304459055	19.1236585695531	2.58185242123515	8.99336830309509	4.88470594790452	-1.64979050895944	5.55678016516693	-2.36720293392447	11.5862289494787	-6.39256120814102	1.38383840719062	3.23566093967711	-6.49072684146188	-4.67612881776568	0.162806745245705	-11.0944125807532	8.84661392114325	-7.30608788265492	0.465987626742921	-4.05331370030402	-5.25209329397879	7.30037732855655	-2.14910794716863	-0.771210514292304	2.77905981307791	-4.92286302048775	-1.28975169275109	0.354014931638077	3.77900495101211	-3.65315423083648	0.0805945790226053	-2.58591252024222	-0.746776182316763
GTEx	GTEX-V1D1	GTEX-V1D1-0526-SM-4JBGW	SRR1087992		100074360	55.91105054	38.93990029	0	1	0	0	0	0	1	-1.52388549389758	21.0549393409243	-0.0835526346064064	3.32129623022027	-2.64651980162043	-7.76285728552454	-1.13488170220142	-1.73149351368692	2.65571848256973	1.23951825295809	1.1806419635703	-0.162702019553995	1.21574414006017	-0.999779061729117	-1.43426362041395	0.212784993800367	-0.34226719739519	0.022408532545329	-0.441323200874948	0.921929967383255	1.19592813582175	-2.08207429867201	-2.2829082728149	-2.60411452529967	0.0417625624181871	-0.101779071724384	-1.23595116210198	-0.300093402377927	0.770103081897472	-0.517333351997969	-0.617637520256829	-0.477055062749404	0.235570676217966	1.73928591387331	0.48371910975606
GTEx	GTEX-XQ3S	GTEX-XQ3S-0626-SM-4BOOB	SRR1088142		70103052	66.50041428	26.74352038	0	1	0	0	0	0	1	-1.01724498197585	21.3393826506972	-0.084735949958668	2.84908188052932	-2.2693614322022	-6.46725815318077	-0.696886139690735	-1.02845126779583	3.29738845972441	1.55234156723353	2.52099814040675	-1.52899878534214	-0.453784103467301	0.296891266007351	-1.54410519139686	-0.203144227998655	0.27392773573345	-0.148353445461042	-0.858246297152443	0.725863341912529	2.25965074195847	-2.63182897016906	-2.2507015027603	-3.00269042740434	0.470816770895081	-0.714782861917638	-0.904706626421333	-0.508465662793036	-0.158279933841057	-0.960945810567909	-1.56287940724725	0.23792587370457	1.42726749719572	1.69523993934899	1.39821876058981
GTEx	GTEX-Q2AH	GTEX-Q2AH-0326-SM-48U1K	SRR1088217		82116146	89.59350576	4.286820767	1	0	0	1	0	0	0	-22.2666790181687	-19.7606344235902	3.56669325098881	-8.06596626054787	-2.03303274048482	0.22250997671751	1.45532835813068	-13.3924462924685	-13.4649767541781	-6.78573817122994	-3.34823941805088	3.05775136965772	-1.10104076799307	1.45448676480071	0.796150982925448	-3.73103458729472	-0.163692104879267	2.20623537498213	-2.51677858084635	1.74541987082876	5.76440315777103	-3.43290590637346	-1.12586333319168	0.943210553308062	-1.69550806913164	-6.08761934314934	2.69822677665628	-5.03626416311536	-2.63574154569818	2.04243860476541	-2.18059372595662	0.0867209761668927	1.93244457734849	-1.52905482385829	-0.564077718517982
GTEx	GTEX-XPT6	GTEX-XPT6-0226-SM-4B65L	SRR1088340		123807840	65.46744213	27.83212598	0	1	0	0	0	1	0	-4.5954071609429	15.6419559641777	5.72478612251557	-3.32128218161321	4.03434478277816	6.52033762138509	3.66934427666107	6.06409879799834	-8.128199616993	-1.26897533588136	-0.120193866209912	0.54041832647557	0.120028016503805	-0.52439398760863	0.885483738715712	1.38080457961855	0.58188914382883	0.377564549894335	1.18012121255795	-1.08239954154457	1.43262059893418	-4.02377543631852	-0.0959005191289978	3.28193293387079	-2.29881927113127	-0.654584404315232	0.108925496379359	1.15622814996943	0.48053400274968	-1.74061696968132	-0.606816110336197	2.48278453354875	-1.16777958570333	-0.594939663485555	-1.43477481521791
GTEx	GTEX-U8XE	GTEX-U8XE-1026-SM-4E3HM	SRR1088606		106210526	88.98010354	3.197329048	1	0	0	0	1	0	0	-17.9838683852747	-16.1982637408095	2.11793243310253	0.790327486083339	2.46579339749568	13.7164248310598	2.88660601597796	-22.6181200071676	0.750274677630239	-1.16971046069964	-12.7571672705206	4.64148363928952	-8.06620522016576	2.03799414326676	-2.46322330703024	7.6816699529333	-4.3684715246815	-13.5794803968051	-1.24103575062031	-2.93620830532143	5.6662835476987	-10.6061337193815	-3.62952712435719	2.37196635589064	-2.16660760202725	-0.79877957308368	2.12846210028833	0.866953032882676	-2.67398888371771	-3.34648292402082	-2.83079354190678	0.327308548766866	-3.89922719896858	3.37093044745607	2.62375432302792
GTEx	GTEX-XV7Q	GTEX-XV7Q-0726-SM-4BRV6	SRR1088734		92063774	68.1018812	25.79410442	0	1	0	0	0	1	0	-3.03976342614188	16.1015334409736	3.4524780945939	0.339250836032056	2.61163741050352	5.01790706369421	3.90132231939736	4.31632084871568	-4.55224748726374	-0.302279882790713	-1.98149978048108	1.08146040042987	1.47830607832163	-1.04335830136529	2.83330706355515	0.0201525765228376	-0.134749135032333	-0.259769148122815	-0.405955615240524	0.953916466132844	-0.379721155390313	-0.0828376312578074	0.769063936901046	0.0224768784719092	-0.791653724951652	-0.450919704779845	0.138752658681494	0.604226096216206	-0.346647210805537	-0.0617344628922386	-0.956797896135201	1.95330463991134	0.145314716166352	0.170180319560516	-1.50963435517038
GTEx	GTEX-T5JC	GTEX-T5JC-0326-SM-4DM5C	SRR1088958		80821088	91.09367842	1.662922429	1	0	0	1	0	0	0	-18.2886484938103	-18.7760772884801	-15.6120089024897	16.9835729238169	1.13660223258041	2.63939064945478	2.19432873518169	-1.21052787195969	3.07765560926412	-1.69847567190226	8.98950049800428	-3.14937202799087	4.91408322354108	-4.74894464245808	13.3512687870928	-4.45355147480326	-0.19306612053647	-4.40095235590003	1.18406878445212	0.331708709856894	-0.3845131037795	2.8276138064649	-5.30450697239924	-0.703371821969547	1.74465471235836	0.0712427493752918	3.42371762148446	-2.58342517803312	-1.35863244402066	-4.75372963609416	2.6766043126363	-5.23635043730949	-4.64753045600364	2.99143112206049	0.555329613741636
GTEx	GTEX-Q2AG	GTEX-Q2AG-0926-SM-48U1Q	SRR1089006		81277090	89.25933495	1.59441732	1	0	0	1	0	0	0	-19.1970152308755	-19.2084481389621	-14.8942347599771	17.0174606480731	1.9707458219103	2.33636000122733	2.21087395694052	2.61767133577233	5.31069712199662	3.12199344060058	7.16283769142622	-4.56691708759895	1.54510522545156	-2.87044375775148	1.50403696371381	0.622415400219133	-1.41602190584059	0.734132869759667	1.13862146322081	0.954093975666413	-5.55745412081581	-1.54830609592608	1.80206464176522	2.96564362015882	-2.23494603928647	1.98672905000348	0.977295113096823	-0.587842956267385	0.407482639828789	-1.77000844575089	-3.3830291986267	0.25071294546508	2.61945123342862	-0.855665422398337	2.6530838220909
GTEx	GTEX-S3XE	GTEX-S3XE-0226-SM-4AD6I	SRR1089713		67367630	88.33805197	6.454188755	1	0	0	0	1	0	0	-18.4597672167215	-16.2369185027296	0.276041142983965	-5.7191668283414	-3.7854195051604	-6.07687200415752	-0.0963593020539368	4.59296719544191	1.46963434342007	-0.283787559986576	-11.1686411421039	4.93731446255129	-5.29586150576962	1.63546255538935	-0.40837746771555	3.31182874648594	-0.232277015459988	-0.298252091012227	1.48442425547881	-1.12703324992679	-1.79844388404147	1.88025943625172	-4.14064797621608	-0.0220991843349362	1.68636435149095	-2.19415310801314	0.0805393050445982	-2.40871252204742	-1.62810896561049	2.08899957298983	1.17404801511206	3.19890355435276	1.78388984192014	1.46646731936554	2.57640618847482
GTEx	GTEX-RWS6	GTEX-RWS6-0426-SM-47JXH	SRR1090145		86655678	80.59158455	11.26795638	1	0	0	0	1	0	0	-11.3111761579352	-3.90778832824351	-5.6081612027396	5.42429601080553	-2.44184320017128	-3.6421152677864	-3.45732733116472	-2.9076657447895	-3.50267069381798	2.37046127553469	-9.84523605088797	5.87363038118743	0.123574851811209	-1.13586779156253	0.518924393297875	6.61058106896711	-0.934308195784808	1.52587128755262	0.199189819876414	0.289045207413909	-1.59824831463693	0.489838388981166	-4.94875794651575	0.741518552561398	1.41025748279434	-1.18711364054525	1.36536435817476	-3.97689276046125	-1.50533321399663	0.210987952110196	-0.232681484988045	-2.64700259415324	3.23430304939783	-1.17292544035318	1.11576615968872
GTEx	GTEX-XPVG	GTEX-XPVG-0726-SM-4B658	SRR1090483		116006374	62.4554337	31.30869343	0	1	0	0	0	1	0	-2.69908922166075	18.5485512658118	3.24160306956511	0.242409591955979	1.99455603984517	1.85792073678763	0.493450795953122	6.77275857846134	-4.19164089576725	-0.866394672136802	-0.511084637012284	0.747259375773405	2.04221414254074	-1.95384813472796	1.99259631967231	3.5262110920459	-0.31524666910712	-1.07447613190077	0.918570367741045	-0.465277779910313	0.325763305334108	1.09748381364191	2.7619728835916	2.92183514339243	-1.23896743254786	3.78337293798007	-1.33443107822888	-3.48102000809008	-3.35128420801779	-0.874355306626568	0.709610372276542	-0.886790193402299	-0.368840242787729	-0.669646298718751	-1.60207410678229
GTEx	GTEX-VJYA	GTEX-VJYA-0226-SM-4KL1Q	SRR1090580		81139474	86.83982102	4.762678151	1	0	0	1	0	0	0	-23.4064713368734	-26.0101496849831	8.08943102542047	-19.0405995059908	-9.02157319045826	-12.1711380592379	14.5857885973467	5.79766016003223	5.95471652331878	0.931284604852345	3.15561384317327	-1.6307444948059	3.49882782740665	0.149846129427621	-0.800389141190913	0.532409767956574	-0.52178278132146	-9.71213908912117	-2.85469254832147	-0.337989998287163	2.28169670128726	1.93393672813531	0.563817516245611	-0.520138313993542	-0.163603370905246	3.4462375227111	4.47227096624183	2.15297438246294	0.676041180246761	-0.00738737749573777	-0.0921209405583464	-1.32122245833196	3.87363756326653	-3.69130377866867	-0.0547866049965616
GTEx	GTEX-TMMY	GTEX-TMMY-1026-SM-4DXTI	SRR1090861		86108870	88.88134521	3.465478063	1	0	0	1	0	0	0	-19.3325607134615	-17.5346012974205	-11.7071162496217	11.2875720575048	0.274160467452858	-0.377360805687282	-2.99784926523245	2.74263574115281	-4.55941272571083	-5.40493894643424	1.11654020816531	1.07022409774466	0.241864963993614	2.65494859321988	-1.16044479973337	-3.69317753098384	1.30713221745829	-3.40589383376757	3.28970652278503	-2.55594487727687	2.38453584601933	-2.10498168887582	-2.52682733602722	0.355637073513224	-1.87591541851015	1.10345273315562	-1.0135381703941	0.0476242866048743	2.11049321029082	-0.442097814600916	1.40194391533359	-1.71409742624739	1.1557721169978	-0.534548568261505	-1.4563771153735
GTEx	GTEX-XXEK	GTEX-XXEK-0726-SM-4BRWF	SRR1091254		65439504	87.75536868	4.206257431	1	0	0	1	0	0	0	-18.4617676078031	-18.3665906835399	-9.39242988617402	11.6220072281337	-1.0301717628132	-0.181609734778086	-0.719048174612219	0.716109024087775	-5.14773539150595	-5.34876989240156	1.5486627053652	-1.63283513224731	-0.0387426266834992	3.04314667942923	-0.840428010879218	-8.18293251683252	0.987978350255848	-10.2593689241184	-2.41580966613878	-0.700525296458083	5.30268257987304	4.26493756849883	-3.07711878309533	0.5219844964873	3.18425571406008	-4.76248524841314	0.927626081559082	-3.74323708312819	-3.06965830671109	4.30851174281083	1.42789211106073	3.88435268121831	2.58175018031441	1.31647051302694	-0.484701326282582
GTEx	GTEX-UPIC	GTEX-UPIC-0326-SM-4IHJ9	SRR1091622		83898552	83.78967971	9.996704115	1	0	0	0	1	0	0	-11.7437260681207	-3.33831657077493	-3.68679405981326	3.53883341997769	2.83469983034882	0.0665192383730744	-12.7878160121367	6.54006488543966	4.32381091937738	10.9807621738651	-7.93663831891039	3.84640021779793	-2.07872927600882	0.525105317502634	2.46597976163854	-1.69643989315795	-1.54964631270716	-2.51271665595727	3.77229996828505	-2.76611833343537	-6.25507088311219	-1.77454935082801	-5.09786375941597	-0.989884294318574	0.411802503974859	2.94343545663264	1.81408596753927	-0.490847210512201	-2.52567923580354	-1.06002999590655	1.51663045786298	-3.24389726634782	-2.28540897148813	2.48810826508153	-3.46468052738273
GTEx	GTEX-XQ8I	GTEX-XQ8I-0326-SM-4BOPN	SRR1091890		87553804	84.52501504	8.338232797	1	0	0	0	1	0	0	-14.5448703238454	-4.29719174658155	2.22390271374615	-3.46569966729623	4.30942828624662	4.0720465429865	-17.6188676850435	1.90797042070992	2.68965012436882	2.85726507323076	-2.07826650830706	1.46631586487611	0.20411408152683	-0.289970237779067	1.14605175835575	1.76960123891897	0.0671053112522718	-2.33620104251461	4.07364760984279	-3.93072268802393	-0.89233796718995	-1.5642929812077	-4.27818134591194	0.151986465710721	-3.22280006341455	1.45783293360443	-3.26332005250041	2.40926583582025	5.4909624763271	-0.458025451858369	3.13613221335835	-2.84157974596026	0.750301585149124	0.0840173403662513	-2.24585424679046
GTEx	GTEX-QVUS	GTEX-QVUS-0426-SM-48FE3	SRR1092112		81928470	88.70867233	2.330447523	1	0	0	1	0	0	0	-18.1736229415778	-15.9321687007364	4.22716384373367	-5.53671580344671	2.56107527428475	5.13462367192151	-0.515760986882368	-12.3160427712282	-2.01848718512041	-0.446776854304185	-1.78524409414738	3.17582484949676	2.94835245682719	-1.98363546668858	7.97299459299171	-6.25497401450041	0.782008916691359	6.42282876152964	-4.35304455937753	4.60376132924593	-2.04133455595622	-4.74431274631641	5.83984238571339	-0.439145865411094	-3.53223810472911	-8.01782265820094	-1.0991219632138	0.868162551980354	0.514471524422108	2.28029790403942	0.10485365261119	-0.113384646434431	2.2080981491201	1.23476311798271	-6.52565561731
GTEx	GTEX-U8XE	GTEX-U8XE-1226-SM-4E3HN	SRR1092372		106143656	88.63583896	2.585878519	1	0	0	1	0	0	0	-19.302384689575	-19.6459407081785	-6.49801352566554	9.22995570117769	-0.239789653947346	10.1775924070286	8.72668621200564	-19.8960701718068	-1.38672823841146	-9.0556060021672	-0.410931586344059	0.117224982670411	0.147517880056828	-0.962870282495225	1.09743083691109	6.06438242824658	-3.19893964344146	-9.3542697926032	-4.36563493373368	-1.44812235875874	11.410284862942	-3.45577185859544	-2.93682776681854	-0.360448742988025	-0.282382933994895	-3.11072884254027	3.34826886950409	-0.858864860966911	-0.90168467869693	-5.32279356644203	-2.19560603263118	-2.56160217369536	-7.38858447087805	0.0195861786947477	-3.39964283285586
GTEx	GTEX-X8HC	GTEX-X8HC-1026-SM-46MWH	SRR1092889		78009246	76.80597759	16.0218572	0	1	0	0	0	1	0	-5.66911663962681	10.8681437129177	5.82693799145094	1.84007421132916	3.3757565881055	12.5398219856851	9.07788680521968	-9.67416091881888	-0.254223884353061	-3.82311044245078	-3.13325447951488	0.0872612528411447	-0.970570678588077	0.0875857274412875	1.40557269201141	-1.76456355032144	0.328801961214352	-3.06404937369014	3.52831081050686	0.699438230024174	-6.040804119188	9.19200083154734	0.299580648360132	-5.72262736243128	0.030544387293514	-3.09959649686458	-1.88468103074891	-0.657692473710439	0.062632412164095	1.57119952073312	1.90369934235356	-3.23447244833029	0.614011747979222	2.3826903180821	-1.82174423005559
GTEx	GTEX-R53T	GTEX-R53T-0726-SM-48FCS	SRR1093218		78212236	87.44457836	3.860564733	1	0	0	0	1	0	0	-16.7655591015861	-18.8040380467083	4.4112483553227	-4.44267391015376	4.32178702575954	3.90920372176656	-12.314753327874	4.84897814312976	2.62716994988892	8.49877043746621	1.36594699241881	-5.36318770761716	-5.15010054182185	-0.143882900368891	-2.17076567259068	6.03758046042461	-1.0788974299696	-5.34919002907199	-4.21532384694622	2.79450892170342	-8.62687728026853	-0.993155250440184	1.48715806830815	-6.56990382390779	0.993703723368565	-0.640394888501417	1.93874024049905	-1.95337111573916	-2.07545574931913	-0.282621722291499	-3.50024073524673	-0.814952023333713	-0.849683287378779	-1.9627221215375	-1.62817175821352
GTEx	GTEX-XUJ4	GTEX-XUJ4-0626-SM-4BOOO	SRR1093243		65643154	68.02523535	26.03097042	0	1	0	0	0	1	0	-3.08677925433905	17.292104122346	3.85643272276343	-0.810825758774362	1.58142161834446	1.55970423988741	3.25541481346127	5.4400895538689	-5.10872082768213	-1.89022154778924	-1.36586233999052	0.27654861540406	0.308443995561348	-0.960288944624782	2.88426060507492	1.03582154877039	-0.688672660500793	-0.213570453098044	0.0898291152238734	0.323713775855024	-1.62484846097143	1.53091040382156	0.656612161721438	4.28390391192445	-1.18886344619561	-0.551774345841424	-0.171940320676559	-1.03124099601416	0.797463798062532	-0.376191137595285	0.841397867219699	1.26481570832125	-1.17033699210444	-0.580265993477946	-1.13402795215911
GTEx	GTEX-XBEC	GTEX-XBEC-1226-SM-4AT65	SRR1093269		79066852	80.57392749	10.2282509	0	1	0	0	0	1	0	-4.55121455128341	16.5987348547929	7.0900530501872	1.74835041053446	6.87305434224566	15.67044440882	10.9178986225605	4.09499969993742	-2.21415906535001	-1.3468448263154	0.60963985691838	-2.54693418594325	-3.98280533224059	1.64585546602406	1.5407492867186	0.459478613360276	-0.00814493775107118	0.99443270092197	1.52147915674621	-0.552281560002651	-0.545407658639928	1.46767288229811	-1.77931373390317	-2.23763852421254	-0.148255359026033	-2.42181361869579	-3.80216126413183	-1.28365023532041	2.63363583860794	1.52417023492943	1.06903659976521	-2.21549432942878	1.32568123470915	0.710142579723659	0.376818622406441
GTEx	GTEX-X5EB	GTEX-X5EB-0826-SM-46MVS	SRR1093649		77749458	78.76201272	14.1692589	0	1	0	0	0	0	1	-16.1771043669745	-20.5601819765576	24.6351015369325	-37.6614753623109	-8.41708936189032	-9.53012456944414	14.7281925692025	-28.0552867118424	-39.5158429116042	19.8985448001597	12.6021911387408	-4.65424225570711	6.70015399141711	-4.26041059758944	-8.04251693548434	-2.52917706120248	0.199596646284736	14.8799847956812	9.92071968435105	-1.2305754393116	-2.95618856261671	3.25988983012676	-11.7853092368759	7.23383630079343	6.28469152352585	-2.80789522974618	7.4309583322588	-9.50891269243693	-11.5451703245259	-5.11361915093601	1.76066253623415	-5.91129937091455	-3.7986734622787	8.30814492949714	5.02567771001486
GTEx	GTEX-S3XE	GTEX-S3XE-0326-SM-4AD6L	SRR1093673		81980368	88.45387227	5.873925816	1	0	0	1	0	0	0	-16.7540614522832	-14.6558680386125	-5.49067006956143	6.70785494818597	-1.75859484541535	-0.349964949256568	-1.80230142644863	-2.98882186411131	-7.55700523258166	-9.85175988196522	-3.51334959443317	3.10981070252209	-1.27644046468176	2.61915112420469	-6.72786348653976	0.885203392698733	0.539648055958206	-0.495406549496791	0.302684887657899	-1.52092329521274	6.04884788415728	2.92128477585499	-2.97630267740816	-0.741516113899094	1.31067256299583	-2.7491928823008	-0.323442416850184	-3.48513418576735	-0.192973808602988	2.32928489160926	0.0481352194923704	0.614008684359963	1.34535580597323	-1.92294459615558	-2.20882087367086
GTEx	GTEX-WEY5	GTEX-WEY5-0326-SM-4LMI7	SRR1093906		85227558	80.56710249	12.86064773	1	0	0	0	1	0	0	-14.7707944029956	-5.88899602822094	21.3735119044781	-28.3825106008588	8.35258734518975	7.90033041470109	-45.8634721830971	1.95554902083349	1.32444240532901	-16.9699642312373	22.9314305890762	-14.5591401535435	8.70217843860618	-11.0682342265667	3.42263647211769	18.7242332663569	-3.62709596894474	-4.68647664746641	-4.08579728242025	1.6369461961609	-4.38688552497914	4.07355208919191	1.18265877030462	-2.73377749904352	2.12597992325456	-2.03000023079166	1.64412191162732	-1.41646793631856	-5.88977790491847	3.44688599011743	-0.245297554434758	-3.25925776165703	6.75164691011681	4.32122709883729	0.873634085956494
GTEx	GTEX-S4P3	GTEX-S4P3-0326-SM-4AD6P	SRR1094027		68010430	86.43291036	7.837477281	1	0	0	1	0	0	0	-17.6458600984761	-14.7412954369237	-8.45331935085617	6.40933731837192	-0.521877869376742	-4.23547894722421	-3.40214548218081	4.61865692479903	-6.34034392252691	-1.53787335999058	2.62633090703071	0.311335045219177	2.79560343042281	0.499617837834497	1.03269281720357	-4.72034461354207	0.64834356438266	-2.1622731526847	1.67000275175028	0.0586226053995109	-1.12428950448102	-2.27555842606926	1.62482906273614	0.788925640717257	-1.58599614437752	1.58335863820906	-1.44456882287289	1.04811876180284	1.28341730228292	-1.81010087269813	-0.914857885558702	-1.16175929606308	0.553926450793219	0.202142090375674	2.07368935855375
GTEx	GTEX-XYKS	GTEX-XYKS-0226-SM-4BRW3	SRR1094192		79782268	73.16594459	20.64698136	0	1	0	0	0	1	0	-2.68978397731425	15.412801041717	5.57431698801069	-1.68704892146317	3.3757899105376	7.1365998629541	4.69024005640182	7.05961723638739	-6.62966076303654	-3.27656856467433	-2.29358124226515	0.339181024631483	-0.843053859747425	-0.309039926642807	2.78606309917486	0.898591622121625	-0.502321352060298	-1.63737522931888	-1.95140969431275	-0.0510062297163355	-1.30402778905345	0.77209399345288	0.263471389750366	3.00492143656281	-0.701594360169146	0.574532289777616	0.380039231077847	-1.07512372208855	0.991432152441301	-1.15739948435934	-0.30848232744129	0.659933990756213	-0.00649193352362364	-1.20531035901762	-2.32229816779729
GTEx	GTEX-WH7G	GTEX-WH7G-0626-SM-4LVMO	SRR1094430		67563364	87.41403403	4.845099187	1	0	0	1	0	0	0	-20.4799863251974	-20.2871602618593	-5.67852424869457	-0.271636698197748	-2.48703744905199	-7.96900423252696	0.335319503142875	4.911089778305	-11.7855542785654	5.75118400447705	5.03948719806561	-2.06788651350091	2.47665309907435	3.35019378812237	-2.72847885466391	-1.96786583526932	3.60036519873589	-5.05009715358516	0.316963596107635	-1.99449652133889	1.03539118143255	2.66175491965967	1.54724184802395	-1.69739840676245	1.11927778852221	2.63012985985323	-3.37708899955201	4.80565136053525	4.97503532499644	-1.73147654523975	0.666137160830362	0.295652273926257	0.367190404839102	0.237642337286334	1.89811959535408
GTEx	GTEX-QV31	GTEX-QV31-0326-SM-447BM	SRR1095840		76015180	89.35750991	4.952105619	1	0	0	1	0	0	0	-16.7514574603147	-15.0673995868369	-9.11738472574465	7.46712548634804	-0.765512956263142	-4.7849293605663	-2.59191602144143	2.88249946705336	-6.03906115853498	-3.14421785024434	-0.59632720050223	1.62672000550175	2.47450079066382	0.0375183498808219	3.86198871808469	-4.67475432499697	-0.612039467851312	-4.98008042333163	1.34924626039957	0.406511953032447	1.31798814097257	-2.32652984425591	-0.390880655414189	-0.0464774396278393	-0.994817956482354	1.55143503433833	-0.145633562959946	-0.654679770036803	1.40474992410559	-2.47893537833442	-1.27516054145902	-2.92875400046227	2.30103074079177	-0.133594782101417	4.09402667050133
GTEx	GTEX-RUSQ	GTEX-RUSQ-0426-SM-47JWR	SRR1095985		82699208	86.28139704	4.887466395	1	0	0	0	1	0	0	-18.7734318630082	-14.0197328931604	2.22414887959659	-6.93611722422893	-3.32246749472686	-0.681227359376139	4.3308336884407	-4.28177081390568	6.73438149439884	-4.49173182213184	-12.6476118355481	6.5188820830827	-3.00337531666216	-0.0884869465936184	5.10978081363454	3.73518080992752	-2.16281885746647	-1.82907931772858	2.07951218306273	-1.40695348385647	3.59031320213952	-2.2772795755737	-4.03206204303949	1.20782324762359	-0.338267926930487	-2.27085924411948	-0.589043426669303	-1.92258490262493	1.36466764005045	0.990499493879671	-0.923132257377779	0.681418061590384	4.36994783586302	0.125064837334655	0.655977559049106
GTEx	GTEX-RN64	GTEX-RN64-0726-SM-48FCV	SRR1096736		71352014	86.67109803	4.474749655	1	0	0	0	1	0	0	-16.339744485422	-12.7795430378169	-6.74461124069827	8.85262356787122	3.99019582989564	5.1818618538928	-5.60380318340893	3.94442135179802	10.5530910580338	14.6343003295996	-5.30495382465846	0.0120027441094133	-4.95522989718614	-0.048315355816601	-1.76311568424634	2.81713466969211	-1.61387638808868	2.69533218725974	0.420350364712075	-1.07588665075732	-6.23177331992172	-6.41317157192985	-1.78614308866204	4.8241298502596	-3.76442370818406	-3.19797575948752	-0.475221319112499	-4.62443106806463	-2.431728639871	1.11469965288925	2.76139662840479	-3.8215746410725	-1.03145544543884	1.87365016444226	1.8441543970105
GTEx	GTEX-QMRM	GTEX-QMRM-0626-SM-447BQ	SRR1097501		69789594	88.30899919	4.313918204	1	0	0	1	0	0	0	-21.2743027657579	-23.2865038465567	-8.3646827328856	4.74248069518442	-3.95486573015098	-7.59243768981784	2.90049128256062	6.03560659365484	-6.51069351555389	2.71307012761213	3.75165706966524	-2.42988781335117	0.184005717801857	0.720351626478005	0.599164771413674	-2.66412995592876	-0.101082305286145	-5.70508304295283	-2.07419564208315	2.0269431643159	-2.14876284802446	1.91646029757701	1.35280239756956	-2.97960517351975	1.17889509949293	2.31878218013399	1.99549613306552	1.16395996366078	-1.87561377888706	-1.56707944943414	-1.34827943776441	0.880946101158888	-0.427635186479183	-1.24606105552954	1.23471340241513
GTEx	GTEX-X62O	GTEX-X62O-0826-SM-46MW8	SRR1098288		69919704	84.95791115	5.474731415	0	1	0	0	0	1	0	-3.32765692936991	10.8612669209758	8.20485696544774	-0.39774667027127	5.46174633010144	12.72307542123	7.97550566078829	1.70963213244563	-3.85210820151134	0.463107892349314	-0.0724309174992921	-2.36546685956251	-2.93713644413858	2.43075750989021	4.31303254931455	-3.79682481503518	1.8823441471441	3.12505357985506	-0.894265200817576	3.20018240581334	-6.08704976286414	7.09246480069278	0.485396711855301	-2.89829051705053	-0.222407519511051	-3.93814495409538	-1.28152754697412	-3.57339666807162	0.734990319553256	1.29272731936278	0.180398001571039	-1.48806576153292	2.70042238558787	-0.105042665412431	2.23875669963392
GTEx	GTEX-PSDG	GTEX-PSDG-0826-SM-48TCZ	SRR1098312		87718878	90.30089281	3.530558154	1	0	0	0	1	0	0	-15.2338605500795	-7.48820441935409	-1.93348145028959	2.86178674058178	2.48222038875167	1.9389171879256	-10.3172459218083	2.22929793737376	1.36175490549561	6.45716520907428	-7.9601457970668	4.28378380700458	-4.07278682001525	1.31763321981947	2.85087760868019	-0.406700708429016	-0.250293581954133	4.61068234283429	2.29759717844133	-1.55013601820187	-1.58579741168412	-1.19164941916332	-2.1433918464992	0.433906596982312	-3.663946793987	0.884689795243514	-3.07498288495768	2.79989083517678	2.88116801978419	0.0191744094340269	3.42915595840962	-0.355885888482631	-1.00593990953244	1.96493969863227	0.728610521624424
GTEx	GTEX-XGQ4	GTEX-XGQ4-0626-SM-4AT56	SRR1098405		70188946	82.01960463	10.52957256	1	0	0	0	1	0	0	-15.3739201889435	-5.72967214813037	4.24957971061732	-5.34380157052197	4.76079153264338	5.73139183835511	-20.6366403875127	0.956190942554845	4.87423427026079	-1.3809387038386	-3.08771193772282	1.60628529169304	-0.973036065634577	-0.246613776679301	1.58338970423478	3.94975863398918	-0.916874595979511	-1.98356927485024	3.91305624195736	-2.93788937463668	2.15461391637047	-0.46085823798763	-4.69670748894496	-0.623080712678686	-1.38104374483002	1.06360565308706	2.98924215291282	0.401275153997469	1.23314564074822	-0.569450133810055	2.1873423620527	-3.60798571774403	1.26248734152874	0.0144753908807023	-2.16892060687424
GTEx	GTEX-REY6	GTEX-REY6-0926-SM-48FDA	SRR1098450		75652716	82.28184432	9.070164778	1	0	0	0	1	0	0	-13.67818352496	-5.36453603729696	2.46475872738401	-0.432851088754451	5.29182212602211	7.71436334616778	-17.0539432070128	-1.29842934014308	7.24083152076822	3.62074729339155	-4.76495048798601	2.82859834199773	-1.12850813419721	-1.95477196592541	4.4377858907318	1.04853048897077	-0.704747488342957	0.231490954103685	1.7530998449636	-1.86830388356146	1.57451325520365	-0.283122182951117	-0.960469540426137	1.25217308969122	0.0581804310215589	1.1084951593085	0.146709771539207	-0.612781724918353	2.22131354311145	1.25078481519097	1.73187253471134	-1.93195276765889	1.78844146635314	2.42895817521653	-2.97619300597883
GTEx	GTEX-R55G	GTEX-R55G-0626-SM-48FDB	SRR1099809		74968842	87.53740921	4.334955581	1	0	0	1	0	0	0	-17.1818114180186	-18.3025432513691	-1.56138300315133	-0.326787052482592	1.06085170609046	-1.58163195494207	-3.37320825478829	-2.66190661122345	-11.6306671304754	-1.27381539608184	-0.663476897277682	1.28014638058697	0.927363452624863	-0.571348213550945	5.21277991313441	-7.6845455312328	1.52520283836904	4.43237634217937	-2.36042514025772	4.33396895656903	0.179960193182023	-3.93039932153789	1.76938759097445	-2.25337275133259	-2.14091293618951	-4.14471895775337	-0.222579072417327	-2.95310499978396	-2.47812506312847	-2.45238889367593	-1.14732473475269	-5.9077626754639	-1.58669723215291	3.41762673660815	-0.158159719017433
GTEx	GTEX-QVJO	GTEX-QVJO-0526-SM-447CE	SRR1100370		65597886	89.43040939	2.715980817	1	0	0	1	0	0	0	-18.5297066339119	-17.7221590865049	-15.1408633341782	17.9528379527154	0.63411251584081	3.65401949540913	3.47426309969908	0.526779355557871	3.62141957574857	-0.251983472647162	4.17564038150929	-0.966110271462181	-0.187602081787178	-3.69487262321886	2.89390652253683	6.86319736175652	-2.39774246225548	9.49604862650455	-1.43189854678894	3.13617444304552	-5.11413420891724	3.63429287765397	0.316042796373273	-3.24764755595122	-2.29715555878676	0.0507819944366029	2.16834030038247	0.0775477616765026	-0.101688955519732	-2.29128070551814	1.1465849737527	-3.69198571014737	-1.82830579145498	3.06706026857947	-4.96345200900563
GTEx	GTEX-QCQG	GTEX-QCQG-1526-SM-48U25	SRR1101128		90636546	84.67202843	9.071932198	1	0	0	1	0	0	0	-23.3225581336715	-21.4532922672106	12.0392896043002	-24.0289366496837	-4.81874387050077	-7.9313643061248	-2.57249494748222	-6.15849764504706	-21.5142635881993	14.4392481410805	8.66050884802156	-4.27632231322168	4.11309076427902	-1.77449935841202	2.51576116637001	2.23928844626328	0.827703586714016	-7.10100723657078	-1.50698946168209	-1.36072384255509	2.50749971173022	0.826022321896758	0.310131989347928	-1.72229860300495	1.28980451272458	6.82532573041158	-3.9781739069594	-3.31817241802488	-1.33668873433051	1.38442195078086	1.66485239759309	-3.5159079525758	3.96645607499158	3.45610882820299	-1.71861273237196
GTEx	GTEX-RWSA	GTEX-RWSA-0926-SM-47JXW	SRR1101373		93332746	89.49563318	2.132134846	1	0	0	1	0	0	0	-19.3888508398943	-20.4069097205382	-18.7845728502335	19.6690457048914	0.654115484475918	1.59350635958917	1.16247209344362	2.46449279684855	2.11904882980959	-2.45471792003337	9.1925420214908	-3.95081544169077	1.94278776225529	-2.42166237329094	5.98478280249715	-3.13139621193519	-0.391422783113501	-2.77163232884265	3.28081611497041	-1.33828960091051	-3.10193183319024	1.41339934790623	-3.85895541405185	2.57338981655808	1.22516110336797	0.463386342099801	4.43200901378789	0.317551985896996	-1.51063409358521	-2.68015083466983	4.06470049510815	-2.64500791718858	-2.18953120535303	5.50123423821083	-0.759070846603995
GTEx	GTEX-S33H	GTEX-S33H-0726-SM-4AD6M	SRR1101397		66819404	86.88416018	2.332843316	1	0	0	1	0	0	0	-20.3919318877305	-22.6572837251044	-4.22807857719595	4.80534824712061	0.680433105989529	1.79727322790017	6.27253864820809	-1.040804035682	4.87123451103197	9.31849637159031	8.68669116844003	-5.8844540600522	2.51847887910815	-1.93409494449304	2.99172180987454	-3.89244480534485	-2.36634046475283	-6.6995483666851	-3.114455808734	3.13435817904333	-3.72141248644011	-0.386974811353515	2.24832237214257	0.241103553473012	-1.38307094379647	-0.564983928168097	1.44790936527191	-0.861534489228136	-0.609950312238601	-1.01562509367969	-3.76436857285392	1.55547141166554	2.9535530481469	-1.99344467674253	1.63929737512591
GTEx	GTEX-U3ZN	GTEX-U3ZN-0526-SM-4DXTH	SRR1101591		82790954	88.01614969	4.39009315	1	0	0	1	0	0	0	-21.9843544326011	-22.9024946768982	4.83528584177663	-10.739117137864	0.149116301599764	-2.18031751449796	-3.44069737676388	7.92022687544876	1.62731458705336	-3.76205286726799	5.53349322031068	-2.87009556345211	-0.688576278489854	1.91692612862761	-4.75096899571023	-4.48400218016641	0.415488175206353	-3.53201154147655	-8.1934711902212	4.47094803121388	-4.80524985737981	-2.09131885563643	2.05062014751056	0.121711914638237	-0.169427530326182	-4.52529420460927	0.151060015323967	-0.225913941804912	-2.42319833337372	0.489262850775679	-0.386246982924558	2.93759594308984	-2.37411834145296	1.01152261104632	-2.58131064412259
GTEx	GTEX-QDVN	GTEX-QDVN-0226-SM-48TZ9	SRR1101669		76124140	90.91774567	3.830159526	1	0	0	1	0	0	0	-17.1735003268385	-14.5159207458827	-5.60072000451338	3.85631678310415	-1.88934097654565	-2.3824583910633	-2.28555923872248	-3.93950978193402	-10.910415755482	-6.34826189682439	-6.23228220116323	4.28929994212547	-1.57893697544226	1.00491725545316	0.430826422025321	-0.101463125659415	-0.471758558134505	-0.132390760237242	-3.11252465434045	1.48311982856812	6.03917332097628	0.760174304104951	-2.10707962022713	-2.44131289582639	2.01313230003918	-3.84204747474407	-1.07636534115378	-3.55661252670798	-0.983485773574322	1.6954973424297	-0.641374677243436	0.941431155017372	1.02643678574581	-0.418412361024839	-1.45800405009169
GTEx	GTEX-PW2O	GTEX-PW2O-0426-SM-48TCC	SRR1101957		85499284	90.68862846	3.37530078	1	0	0	1	0	0	0	-18.8279282093649	-19.1903275490719	-12.6693452087551	13.1462340490282	-0.0196620407821896	-3.04515351023392	-1.49590813931439	7.18692517728896	-3.36462766271513	-0.119500573358524	4.83349571139774	-2.46263926719318	0.619784384234231	3.82244572494959	-3.88969525293309	-8.2596365044401	1.4274625188647	-10.9371620712911	2.15438607616601	-1.25590527564119	-0.5391865046483	1.31955501459953	-1.91294600276131	0.984869628655068	2.39311072725335	-2.13856391176133	3.09490426515	-0.989587892365315	-2.5112961667958	1.95502755276066	0.438209561545227	3.99933344441891	0.641066862599875	-0.251910403099303	0.782387774316693
GTEx	GTEX-QDT8	GTEX-QDT8-1026-SM-43V6X	SRR1102443		83915092	90.71108687	3.452077488	1	0	0	1	0	0	0	-15.3092442566985	-10.7300614136219	-8.99497830032438	9.48586543687927	1.97589949365716	-0.412520550888143	-3.82238095117161	3.08866865244272	1.59698962471453	3.13818373808598	3.51102173461645	-0.0967583228958612	5.25017917742632	-2.30879442121801	7.4020848083276	-7.09525558286401	0.44317671946915	-1.46474416367696	3.0424617386807	-0.685632161416872	-3.21178532077267	-2.16557704655712	1.51605161605361	0.529288820929109	-1.19593321653552	3.29834156645562	-1.08331397491832	1.25287038539621	0.942408139773488	-1.19429484379895	-1.42210005071562	-1.84369919203154	0.750377914433539	2.22449334289496	-0.682882878825987
GTEx	GTEX-XPT6	GTEX-XPT6-0426-SM-4B672	SRR1102680		127633972	85.88825865	6.649314338	1	0	0	0	1	0	0	-15.9487184088359	-13.3356012690983	2.2902766611515	-7.19144146955078	-0.450986889889497	-1.96926815992956	-4.18661153054929	0.869948790137277	0.777754983323072	6.98221751019618	-6.98742330286576	3.55195234378017	-2.50960336975715	1.39647022704628	0.454296790856708	1.28942756179521	-1.21282744979555	-4.38979835934162	1.89578683754485	-2.48974054179535	0.0844781412726393	-1.98054118705546	-2.81219045866507	0.404840287508132	-1.06628973709693	-0.318639624593663	0.0747581613882368	2.79331540869003	3.84420053652212	-1.69746354289173	2.50826495528306	-3.6730485955546	2.80631093473721	-0.698692916675769	-1.93177465841921
GTEx	GTEX-V1D1	GTEX-V1D1-0626-SM-4JBHN	SRR1102756		79508836	59.39207059	34.47109702	0	1	0	0	0	1	0	-3.24925334233547	17.5009193459308	3.47693397366161	0.997028073481988	3.30714816782483	4.49546507502192	3.96631390536002	6.36563197438748	-3.33848582051843	2.05593977016924	-1.9247533572953	1.49928303458422	4.19481295988566	-2.22342299389725	0.336091352068181	1.13795518242752	-0.312765032919614	-0.426768168128326	0.208343192853348	0.739442914151914	1.70051099178481	1.12061494142401	-0.0999891083579234	-0.0486379736940997	-0.799795883633093	-0.608932762607086	0.25633648249393	0.136314248213871	-0.0972564060551454	-1.53485781273191	-0.776258939596579	-0.511540827548822	1.27232351424455	0.623879383372768	0.025082069420739
GTEx	GTEX-XUZC	GTEX-XUZC-0626-SM-4BOPG	SRR1103092		65842130	85.97517122	6.780369955	1	0	0	1	0	0	0	-18.3189777336112	-13.9072551331873	-3.95202651088218	1.1817689771748	-1.08723157430362	-3.64797737965476	-5.2537791950432	1.16991960970017	-7.40583430876426	-2.58915511045461	1.7467111426926	0.446425209424291	3.62345775568718	1.15982255986793	2.05636547337957	-7.58435271650704	1.48902851465297	-5.75312389448814	1.09254800589276	-0.705236785909589	2.61727172411197	-0.868574785352425	-2.46041309551153	1.1195686039748	0.73882521128618	-1.01749029582638	1.89488261923637	-0.308648894174366	-0.478954924465961	1.82862361371524	1.02130002186501	0.659668361900318	2.37217843445437	0.322533577595294	1.10350138799602
GTEx	GTEX-S4Z8	GTEX-S4Z8-0926-SM-4AD6Q	SRR1105320		66277362	90.14569409	4.334831552	1	0	0	0	1	0	0	-14.5117957215063	-9.87672937719006	-3.60339219167041	2.13308217629758	0.873071023981884	-1.32293585504718	-10.664457182795	5.12634360013905	0.153728727365291	2.45612487169586	-8.5877556585523	3.85724897012283	-3.23661812962053	-0.238591852839061	1.82607691750029	4.17383822904307	-0.749007857731041	0.312626501750385	1.35354751451726	-1.42026104187562	-4.2939906134795	-2.4765819583882	-3.59113042206881	-1.41034512543752	0.0718682675622317	0.738267810079536	-1.19905500814295	0.743855275485738	2.0785018324544	-1.39448285937387	0.807436303111296	-2.96295128123809	0.464213069668941	0.374372410032205	2.58052151082924
GTEx	GTEX-U3ZM	GTEX-U3ZM-0326-SM-4DXUJ	SRR1120318		82152576	88.65116293	4.39368572	1	0	0	1	0	0	0	-18.0036099318689	-15.3747029993513	-6.87162916007459	5.58289629093429	-0.0912492524091224	-4.10914940211094	-4.94232077543359	2.30151388198495	-8.72275669275775	-2.51525737485659	-0.973424951803445	2.09211148763319	1.07306190657002	1.23707198587301	3.68607369102818	-7.21358050113964	0.778938181141769	-3.85075746593114	0.285328438213569	0.621880748121829	0.835163885262548	-0.508706769790324	0.242294190024721	-0.31712656270321	1.08675666828366	-0.423332613622006	-1.79317047213931	-0.130241957969303	0.233877077516387	1.57620042268983	0.0412310570721762	3.80437039499255	1.30250092081757	-1.92161042818254	5.0255561764985
GTEx	GTEX-U4B1	GTEX-U4B1-0226-SM-4DXU8	SRR1120384		69902322	86.71691335	5.467721087	1	0	0	0	1	0	0	-24.0190128610539	-22.6712320597767	7.61809196467541	-21.9981339716847	-7.88972659904207	-12.1446771527099	7.45848672103211	9.27742713622071	7.06413948607157	3.34720281082329	-8.96494831857447	3.30999273602005	-4.12624135593376	1.14679081372728	2.69473224288209	3.88909839900785	-0.712004884304745	-2.42722801509603	2.42833636829758	-1.46933756518103	-3.0393377651357	1.17364583938096	-3.24982827655551	-2.06725086150703	-0.0424156612153705	1.53751767522257	0.712639181822055	0.960127142366028	-0.536415502048722	0.00846426177707744	1.90598076940293	-0.303266089633943	0.562048729606407	3.33788414677198	1.94404456694724
GTEx	GTEX-111YS	GTEX-111YS-0426-SM-5987O	SRR1307699		101040880	56.05163573	37.23750822	0	1	0	0	0	0	1	-1.3066605256694	22.1833207798746	0.143952980300146	3.04015664291811	-3.12897772251815	-8.05500165875403	-2.18728020506216	-1.32761359409618	1.65557734557593	-0.493426713377875	1.81188520940289	-0.870041069577971	-1.96310388456054	0.726826652173905	1.29675299634599	0.651469117062339	0.111015671330396	0.143148937168434	-0.324082824005887	-0.55602016349681	1.58429133832441	-1.82977543011488	-0.460345719654567	1.32965958013726	-0.292638286993371	0.723304906836638	0.302525437977661	1.02203073823707	0.893080937260783	-0.739929434590047	-0.0836268057445285	1.62718431723245	-0.0652624131699771	0.635614681413487	-0.507254474711517
GTEx	GTEX-11DYG	GTEX-11DYG-0926-SM-5EGGW	SRR1308086		82172340	83.21542018	3.072055633	1	0	0	0	1	0	0	-17.1919194111635	-13.4007859210193	1.52872396292508	3.74984483183894	9.69662954017251	17.0507451254544	-12.0899224273154	2.79869368563586	20.6651989439273	20.0739613531915	1.26209881860615	-1.73802653435078	-4.28000735473225	4.7072391637861	-0.615667829415095	-6.93590906659048	1.45414960228127	11.9797156726004	5.01205835749081	-5.54122463868128	14.6935156388195	6.1985818773869	6.86935572792406	6.8539237496465	-1.04710774369213	8.69266265231716	6.59442378645177	-4.49589566455656	-5.20608567039979	-0.307251660446397	2.96537506062866	-7.44086927708436	0.200953121558877	0.628195900587799	-4.02932540994155
GTEx	GTEX-11DYG	GTEX-11DYG-1026-SM-5A5JQ	SRR1308200		106394802	80.7687541	11.16686321	0	1	0	0	0	1	0	-2.51680192524065	20.7137559425939	4.51868997600792	2.76053638564754	6.48793788248444	11.6649459359541	9.5231737315533	12.0175399273665	-2.36596730896495	2.46214784699922	2.11399426477757	-3.33258077540364	-3.00654727074512	0.245155244160421	2.74573898319268	2.27071438028733	1.0091933578862	1.98013424743345	2.31438226061822	-1.60478983333534	4.77182246019991	-1.65342722839765	-0.445889196309428	-2.73146683730266	0.142059836838029	-1.07259522542002	-0.280568888593701	-1.52264069771992	-2.41548630934061	2.1796525449994	0.355973499590333	-4.52198876717045	1.99418942988933	0.441741234562073	1.48432645311669
GTEx	GTEX-117XS	GTEX-117XS-0726-SM-5H131	SRR1308674		85035162	60.34254865	31.54969235	0	1	0	0	0	1	0	-3.5296923720434	17.91984064361	2.78083521095624	2.71632599745939	4.11074229937374	5.63919801160019	4.64832787981967	6.17348373436129	-0.0997083280575892	2.25812417217327	-0.402574510293857	0.441566186789464	3.46763790283157	-2.14004137247236	-2.19679052001365	1.23500622449612	0.142523374022652	0.0616420276871772	1.20524472329013	0.112710123458415	1.93304927323288	-0.758180838706038	-1.23438572260795	-1.48424336938032	0.199253955896303	-1.70502280500562	-1.25311094461727	-0.681966428645091	-0.624767485851355	0.382277082491693	-1.39275934856593	-0.207161885868512	1.77826860866648	1.00918442429397	1.15555830242249
GTEx	GTEX-11DXY	GTEX-11DXY-0826-SM-5EGGR	SRR1308696		95838268	25.74800079	65.81948872	0	1	0	0	0	0	1	-2.44611235249348	18.3034230655948	-1.17205448150633	3.86658938159467	-2.21857973227178	-7.62194434280595	-2.71642682748408	-1.09029947187154	2.11874915008098	2.13936221953886	-3.1816396233654	4.66999689318433	9.52089080896664	-4.68773196977521	-3.96612263556835	0.533163301558007	-0.919050179060091	-1.1223691447362	-0.528285808782337	1.11996794056174	0.102325368795452	-0.49759934522145	1.06097940157519	0.675034703725447	1.31756350052332	1.31348602251885	-0.132602372368492	-1.09370206443992	-1.94609133448948	1.18283485123198	1.48181830715863	-1.59520237023141	-1.59981680047619	-1.17776615282715	0.672161137556992
GTEx	GTEX-11DXX	GTEX-11DXX-0426-SM-5EQ5F	SRR1309382		74525714	86.68983165	5.846953711	1	0	0	1	0	0	0	-17.9198457122859	-16.7815590039965	-5.74485509207201	6.84085130400003	-1.93108551344397	-0.201209953339382	0.230589368286809	-1.77290298768694	-7.785908671064	-7.09073454367306	-1.26760554520193	3.24720330304747	-1.81742008341705	1.8768824535765	-7.5683363256993	1.37418720512083	-0.37280893600579	0.422422485147733	0.733421080367825	-2.37062905447073	2.23379796944731	-4.87032111215394	7.49577298953776	-2.91118877165506	-1.7229066621306	13.9923559624183	-10.0665339368204	-10.5931627315355	-11.8472460913757	0.0304223909055478	-2.63789857671472	-1.51510065369599	3.26253039573462	1.02840651025068	-9.01642725168773
GTEx	GTEX-1122O	GTEX-1122O-0426-SM-5H12G	SRR1309403		82245972	87.88376895	5.033053777	1	0	0	0	1	0	0	-15.3370369261184	-11.4085975646039	-5.06478457866966	3.74532348756888	0.643103654744031	-2.08185734606334	-8.53543363237263	5.80389271748018	-0.275136459208856	5.253191492276	-10.3548418175657	3.90358574599272	-6.15682704783448	2.60193050654344	-0.764750369810686	1.47883820185068	-0.770868790137415	-0.960966167965764	3.00720682240744	-1.89190525751316	-5.0511227581515	0.424122020546585	-3.94678561419069	-1.89261577433728	4.05221915919497	0.0921536319578447	-0.484066562694886	-0.597531779076091	-1.22899964539265	1.90154808556005	0.776449351582097	2.28927631389653	-0.440548879537536	-0.812833345638883	0.877039016614217
GTEx	GTEX-1192W	GTEX-1192W-0226-SM-5EGGT	SRR1309856		83252718	65.03979606	25.84388656	0	1	0	0	0	1	0	-3.00465701702325	12.4340259930837	2.86024803772881	2.9263578585594	3.09451306410756	4.42363649194138	3.83789680113288	1.49355144891475	-0.405573699907047	1.72311929553136	-3.00155904111791	0.197238867749482	1.70832069595911	-1.98892682869276	-1.20771737582046	0.664785992180728	0.0204052800280851	-0.324930165626485	-0.299587526994288	2.32556756133613	-0.962063493419894	1.43975420634387	2.16599427166513	-1.5118129658551	0.0232364605896269	-0.84849271231056	-0.799526687625966	-2.08684553371044	-2.03000355381468	0.61744232625135	2.05706734139685	-1.99623108430377	-1.85597583585909	-1.45225623378283	0.719299556156746
GTEx	GTEX-117XS	GTEX-117XS-0426-SM-5GZZN	SRR1309898		95802990	88.58629986	2.871505367	1	0	0	1	0	0	0	-17.190591623906	-14.881709828952	-15.36993849406	16.8789291580331	-1.21075771209651	0.0291836266726058	3.30526480180707	1.35059550657621	2.54126461922297	-0.92383500641317	1.95127270600975	-1.71111046884879	-0.343333898525506	-2.03789398411013	-2.24450456302945	7.19386248730914	-1.98667901972862	2.40651042002361	-1.78342629155837	0.727055366199774	-1.44507144936658	2.61314667187539	-0.740398430237049	1.44811096994608	1.1564628108316	0.0733027253756458	2.22165332495253	-0.670927464938109	-1.15466141306104	-0.593995821729708	-0.212565461135489	0.739331864744842	0.513917033930112	0.792271310297956	-0.295467719703287
GTEx	GTEX-11GSP	GTEX-11GSP-1326-SM-5A5KY	SRR1310373		107383104	32.28098715	56.27324947	0	1	0	0	0	0	1	-3.25235245267878	16.9958944946386	0.0411751051165482	4.18156178348808	-0.745943110942142	-4.04877744738395	-0.591502389226406	-3.42892883591066	3.88713173904387	1.42617322038776	-1.25723981587265	2.75204766800466	7.978102875507	-2.78981730462022	-6.52587868282989	-0.769831123823716	-0.095263695138231	-0.54221890384518	1.47656354654959	0.756018834552407	-0.889786510038558	0.726227167014908	-0.501377176996059	-2.28665431808451	0.618387135276536	-0.396209137803692	-1.53273160196195	-0.889639861522845	0.507981414242191	1.21672722125812	-0.429740821448609	-1.7025085063747	0.481008172351384	-3.32529083574107	0.594219219284072
GTEx	GTEX-111YS	GTEX-111YS-0326-SM-5GZZ3	SRR1311109		86104678	64.26452695	28.80433279	0	1	0	0	0	1	0	-1.68494111900905	18.8990153411481	1.49852283556019	1.02882479754559	0.799785493960419	0.133839351245331	2.00317823663167	5.42225455848141	-4.5207195158662	-0.812544399538458	-1.40299927521115	0.18648093700356	0.419817735823906	-0.602768101576234	1.88146956498072	2.22734029909846	-0.590479658474268	-1.00108653702236	1.13793202784243	-0.676252896171729	0.0222312425010015	0.882211544701981	1.33570839532583	3.75191252751715	-0.861061161054097	-0.268148511664779	0.232446209075924	0.181948356870971	0.832628866789662	-0.458088805991669	-0.0252789965959558	0.0756003437505036	-1.33440863305604	-1.09811250274283	-0.656146767819204
GTEx	GTEX-11LCK	GTEX-11LCK-0926-SM-5A5KA	SRR1311243		103340440	62.95703405	31.75255689	0	1	0	0	0	0	1	-1.48100368371502	20.8776338974316	0.796127902793948	1.69776902648079	-3.09272367342215	-7.75859354410236	-2.48073663819699	-1.6601846031085	1.28652438665797	-0.716580440168572	2.19598035814107	-1.36113445824873	-3.22685430029179	1.16934398542042	2.44751940633704	0.0958116245500569	0.0775562365695534	0.843641343127594	-0.347829659582589	-0.0940669881752224	0.501437240800437	-1.34327361424279	0.273438445378997	1.90598995427106	-1.28875787080075	1.20664593791093	-0.161698554482128	0.274826649976927	0.156113326338264	-0.660836061327253	0.21696132651881	1.9115613808879	-0.536553361268461	0.505072158018287	-0.974167629564062
GTEx	GTEX-11GSP	GTEX-11GSP-1126-SM-5A5LM	SRR1311441		75398720	88.43140838	3.011345551	1	0	0	1	0	0	0	-18.9680852888432	-18.1885061953614	-11.8690081940312	14.3527010034151	0.559187327969624	5.481359848893	4.964500034621	-1.87021150944627	4.96031532885471	-4.06384116952944	1.41183774956051	-1.61058295973837	-3.15034583445594	0.669218749841741	-6.28745433027491	5.95009160867957	-1.1157242341976	1.92592850800938	-0.454618552285934	-1.2646506417181	-1.71036414835435	0.648718363550386	-0.939218504835773	1.32480946127679	1.02147755111871	-0.416306027043737	-0.884385765011815	-1.87775981441258	-1.33456537569428	2.35813017553229	0.755411057813717	2.4930092609698	-2.15775783919218	-1.1598756965324	-2.81036969602186
GTEx	GTEX-11EM3	GTEX-11EM3-0626-SM-5H12Z	SRR1311509		100214624	72.31542175	21.59285854	0	1	0	0	0	0	1	-2.1293366305279	15.2263516924426	3.0549236779422	0.295304111049787	-4.34016968607798	-5.33924469752342	-0.669237658900875	-9.27732771367253	-2.98952166712579	-4.4085225970832	-1.89651296401444	-0.545469609200288	-8.02616765306136	6.14468838396791	1.03705979332873	-1.03207460320317	-0.11861123529724	-3.47798553073376	2.49597927691219	-0.674534407782304	-6.85878840720648	13.1666152168788	3.59860208006654	6.50591071681989	-0.823411061959521	-1.98820719323876	-1.8695020380375	-5.68644790958248	0.0308544503962273	-1.17527653905003	-0.015942642276959	-5.02182908601187	0.817087929530906	-4.87569535277174	0.376363292138173
GTEx	GTEX-11P81	GTEX-11P81-0326-SM-5HL6B	SRR1311877		79209184	88.41446719	4.604120148	1	0	0	1	0	0	0	-17.7869879944226	-16.3554262656467	-11.580417539871	10.1949906364936	-0.647237070080646	-4.36827751039477	-2.66503203585055	8.36205211982935	-2.50860592315465	-0.299163289825905	3.05961700665158	-0.894076406387228	1.01856368330245	2.06023928850932	-1.17770762885354	-6.34751385095284	1.05149572897389	-7.69234925823943	1.96753891342589	-1.3684353126189	-3.32025491679333	-0.685106526979008	-0.37589755310909	-1.15959967715754	1.44603103236223	2.0536699753707	-0.701759515673909	-1.39360677642539	-4.38147975823188	0.747623591387236	0.378350412011136	2.92487573389978	-0.535783416851256	-0.963020171447571	-1.8852045101655
GTEx	GTEX-11NUK	GTEX-11NUK-0726-SM-5A5ME	SRR1311935		107746050	88.46475207	2.7868604	1	0	0	1	0	0	0	-20.8666260544704	-22.5736985818357	-10.6795971332159	12.2886022465882	0.798651423183688	5.27047771790887	6.52210519526739	0.882273556481847	7.47188078298417	1.90589062434434	5.72353788589861	-4.40146529075154	-3.29979552562163	1.01416056120345	-7.62514777833747	5.25140909438666	-1.44943911776095	0.997824279616655	-0.718568552014096	-0.0262083030339411	-2.00560566376111	-1.29156385133955	2.11193934985342	4.13598082151833	-1.01274663392327	0.558383107441268	0.397275383186582	0.720347655962425	-0.717280219683274	-1.06589055915442	0.508075676301942	1.37535933444111	-4.0510315869752	-0.329813013364084	0.481818085174214
GTEx	GTEX-13OVL	GTEX-13OVL-0526-SM-5KLZQ	SRR1312540		94722774	72.54276569	19.43828841	0	1	0	0	0	0	1	-1.8541894602794	21.3745195648475	1.04276004528134	2.79309248480101	-1.71134159350161	-5.84769118260608	0.292937772752733	-1.96821077010575	4.62432619597556	1.99292122779073	4.18678219262516	-2.84587210580171	-2.36216078109155	1.59829077880679	-1.84150811580333	-1.43751339578167	0.644061966454911	0.909772258348996	0.31331846119203	0.39276169422658	2.47446450139262	-3.32045157610474	-2.62945698163981	-4.90958517382083	-0.130738985565835	-1.31957835546138	-1.20070606774803	0.148440438127048	0.824193293247547	0.449690856875125	-1.08107223612834	-0.728900083377382	2.2719042129246	1.09931310095687	1.01569712881495
GTEx	GTEX-131XG	GTEX-131XG-0626-SM-5GCMP	SRR1313560		78661110	75.13123067	18.93716476	0	1	0	0	0	0	1	-0.491828541485198	18.7556679445081	1.88127422633631	2.19994003948713	-4.37948902012901	-6.83213293633668	-1.23179603606896	-6.22161116154781	0.0980565933285896	-3.91345081514279	1.39115863882098	-3.11371866924258	-11.3011134186031	7.02880955919174	3.14114314160403	-1.5099877882641	0.410008345029355	-2.49689500083388	1.42204044576859	-1.34732603188472	-5.19621505151	10.4882665089254	3.58439529222128	4.70837812448394	-1.60262348879072	-1.53409416086006	-2.38925046876973	-4.16927540437042	1.87568608263673	-0.517919340960833	-0.789554817412507	-3.83745220250392	0.693403359555864	-3.71092295416835	0.418453309726942
GTEx	GTEX-111YS	GTEX-111YS-0526-SM-5GZXJ	SRR1313831		76043766	86.64347581	3.35659073	1	0	0	1	0	0	0	-17.412491054026	-16.8281350461046	-9.88634657125868	11.0476742505714	-1.45692730588616	-2.8201536608983	-2.40357852786447	3.82519517016833	-6.56642846729846	-7.47362721550433	-3.97609249673999	2.46847841300426	-3.86923521424514	3.80421462216171	-6.64256508009704	1.8119090680881	0.545613141136762	3.41857249957306	-2.44666885392141	0.885613474862307	6.58945473076213	6.13622100709404	2.34335070746226	-1.66040831385351	2.26582806134961	-1.28544559395941	-1.03561980191007	0.957725130302272	0.803580505548563	3.64092264612777	1.99222553240554	2.81690073848226	1.6482311343679	-0.453576265516994	-0.505620430219499
GTEx	GTEX-13CF2	GTEX-13CF2-0226-SM-5L3DV	SRR1313853		76207248	81.32667643	8.973710742	0	1	0	0	0	1	0	-2.94997379739181	14.8762130074968	6.92746550019525	2.13142502164444	7.71158174703895	15.4203018628754	10.3232146850659	7.56739403519475	-1.07192722552083	0.894711562262029	0.426960141746035	-2.46206944092867	-2.71430547740791	2.69112358346846	-0.0602378353941246	-1.40246824814308	1.26692167629252	-0.618193414543448	-2.14987656373109	1.6639130100102	-1.63869616982371	1.93295281142099	-1.10275555148159	-3.80909605110202	1.80211195099627	-3.16807881950084	-2.2242428675649	-2.75158349520521	0.719820788414347	1.18671626175638	-0.826476826634318	-2.84635763481571	2.8083977679467	0.109691028117298	1.60749562270547
GTEx	GTEX-11P81	GTEX-11P81-0526-SM-59873	SRR1314851		108465868	55.57014857	36.30354389	0	1	0	0	0	1	0	-2.54141944325261	18.4957080055379	2.38296905074646	0.676184531961238	1.82285687818211	1.00082206771822	2.92178792925101	6.49724445622046	-3.57523947125592	1.72307279002711	-0.434984474101419	0.954234598225003	2.75240805311792	-2.67427809965626	1.53118181799724	1.32224027804126	-0.81525908989359	-1.23257583317135	-0.973445667147266	0.653977292136311	0.81291352590454	-1.19608950886494	-0.161964415305217	0.154117710205428	0.477273007349134	-0.581699684352486	1.89024109675919	0.344997915376789	-2.10878269441389	-0.404868659068888	-0.535480652783542	1.21277735549998	-0.415529343803861	-0.248202713043491	-0.546041304521379
GTEx	GTEX-11TT1	GTEX-11TT1-1226-SM-5Q5AV	SRR1315060		86153998	88.84237967	4.536518433	1	0	0	1	0	0	0	-13.5423059913595	-13.1977774589205	-3.53621237270347	6.93782396506281	-0.957294210159009	2.88932987687581	-0.974683461844293	-13.2794468001945	-8.61355405119317	-13.9735853056882	-6.4679307167889	4.37814901510964	-0.343703737320533	1.34462629748571	4.00789974666686	0.606404680328268	-0.338224123983697	-7.37502322816233	-3.9132498339941	0.395019781006684	14.5453858805404	3.64292865332612	-4.03821054515519	-1.3963258470587	3.4315822146559	-7.13367917277927	0.676471467439268	-7.60611495310893	-2.9845818384858	0.492692389263446	-1.33651564208873	-1.64320147684831	-2.69169861220556	-1.70750320331597	-1.20434946582708
GTEx	GTEX-13FTZ	GTEX-13FTZ-0326-SM-5J1O1	SRR1315393		137485736	69.3068334	18.27071573	0	1	0	0	0	1	0	-7.4204673962923	3.34011354477032	5.81691729569784	-0.0655432599817525	5.2081344392975	9.62534789635361	7.39565524747859	0.0741607965727271	9.08736901259296	4.35777313749058	0.903421991194615	-1.54822341284873	4.256172168614	-0.733635547860876	-9.47358348081704	-1.12216156357746	0.52886538878583	0.506785439779023	1.77445477153485	1.25625289990637	0.932743275272863	2.01146323613626	0.859774282403919	-1.21062061032742	-1.309873998693	-5.96295978925817	-5.27198526797179	-3.11073784188096	2.94238401183763	-1.65770879778561	-0.847266791729195	-2.40914760631351	-3.38813253759216	-4.61832979788542	0.738927534852504
GTEx	GTEX-131XF	GTEX-131XF-0526-SM-5HL87	SRR1315739		94289276	86.43498546	6.182898255	1	0	0	0	1	0	0	-23.8502104167439	-16.6813876000479	16.0173994520851	-25.9982334587558	2.70562498389891	1.27920735892296	-20.3785399959276	1.33695008184783	-12.7231233273646	6.83894821419	7.95316227966866	-5.98362826294447	-2.10724701433174	0.59230130171954	-2.78665032317142	0.82815366797886	0.721854433279035	1.9973950203352	1.29841858271771	-0.805855317288686	-6.63616542791969	-3.72094680637476	-2.93805982974735	-0.111333950882028	-1.80196004769106	-4.59194096915587	-1.85847431050793	1.24783784140944	-2.03646058267621	0.00940369499077903	1.75055985094954	0.81447165906036	-7.0871372480398	1.69474505681661	5.82932525380775
GTEx	GTEX-12WSD	GTEX-12WSD-1126-SM-5EGJD	SRR1316483		93383738	66.99954118	26.66553356	0	1	0	0	0	0	1	-2.00180047098385	20.9585580335717	1.03691441885221	4.08941781551407	-1.9520042905738	-6.10053619758755	0.688322834624565	-4.21262859367947	5.65033975635872	1.02750432448264	4.48729156861639	-3.34975595630145	-3.41844112127652	1.83282029808871	-3.79539078458872	-0.568089036930981	0.874377615063728	0.0034841808143687	1.5465785680678	0.169407750491776	1.83430094390668	-1.98519056605918	-3.60570503865215	-5.97097973487776	-0.417987466708694	-2.19448727304931	-3.32109759131968	-1.02121703726463	1.7382606645483	1.57313294914171	0.45629253643917	-4.13898445219197	0.202080683705939	1.48007470417579	-1.0683947282193
GTEx	GTEX-12WS9	GTEX-12WS9-0826-SM-59HJX	SRR1316725		115766634	75.26084588	10.52042163	0	1	0	0	0	1	0	-12.3334611074574	2.40713697793147	12.9876499920702	-10.5293337216049	5.04677986736779	13.6580331378381	3.63745080729811	-13.4939406366348	-9.38908173386466	-3.17839808448995	-4.20669902963303	4.72643928121133	2.34135091888398	-0.680339678060706	5.33549497950525	-9.80448132151446	-0.603679718735676	5.52137436765543	-4.82862057753166	3.80245192669448	-7.89221456647804	-2.14057369966221	5.37657788343622	-1.34549634753965	-0.284667722933244	2.04909742353152	0.210151022855656	5.90647946845471	2.09312644089584	5.41196707078624	0.799673260989554	7.93206889218409	3.21633804600037	-0.639558533254458	-1.24398330145744
GTEx	GTEX-146FH	GTEX-146FH-1326-SM-5NQBI	SRR1317040		100627504	89.44687727	3.204002755	1	0	0	1	0	0	0	-17.6258252112388	-14.0679539586873	-5.12209418642784	4.94535410474081	0.922393490631936	1.05683583510801	-1.36686268303859	-3.56588414684819	-4.23657175884021	-2.49336461783893	-0.492057841637181	1.68109576065781	3.18732751029378	-1.59367955025411	6.49255327853396	-5.42658536426523	-0.106978707748942	-2.80603563327499	-1.88342787859769	1.12936721498525	0.651228797419157	-6.86925297115287	2.95728858576317	-2.2825538288979	-2.79726837041695	0.865852859734037	-1.14605364708546	1.44908158031038	4.17410996264113	-1.5312385657798	-6.06922451477279	-2.14691794391137	2.53313322340392	-8.60347083142477	-2.37004341580574
GTEx	GTEX-1117F	GTEX-1117F-0626-SM-5N9CS	SRR1317257		80647088	89.93582509	2.895410185	1	0	0	0	1	0	0	-15.2965329819559	-9.03071109277327	9.78031736774521	-8.63664652304312	6.87157222476399	9.34382404504716	-15.6579646555113	-2.60517096795183	8.65959232000177	5.67183201666595	-3.01276533017071	-0.509352894115912	-0.390906826357685	0.0228310445177673	4.14717927991836	-6.48757811907948	1.45548292573893	5.38808475238352	1.46827799751322	2.21951093024931	2.07690981267968	2.08773192475201	3.90727994668998	0.367380478723444	-2.69269585454398	-5.02287863845176	-3.22042337449792	3.52904747248407	1.68538826630735	3.1578824173221	3.34428330060519	4.11234581089931	-1.91438157795514	5.20373500918825	-5.96132026223845
GTEx	GTEX-13NZB	GTEX-13NZB-0226-SM-5KM1T	SRR1317305		105624336	59.76331061	34.78353701	0	1	0	0	0	0	1	-2.26901881878968	21.2043980720885	0.951882246136388	3.09165058781701	-1.51659490473713	-5.08803664104305	-0.518964563311438	-1.57651928563296	3.41167274189963	0.890076063759925	2.70985952022732	-1.42385792273274	-0.432354263578063	0.35308739255328	-2.44169746132362	-0.165632287092702	0.558291658932786	0.75889949045631	0.182308639862776	-0.101063841050416	2.43305213111462	-2.84892776267975	-2.52098814494895	-2.7490526381894	-0.0608449728300232	-0.832252128888605	-1.08274835755044	0.769128670445669	0.580282230196137	0.513745924653968	0.0613737494465139	-0.11171243025871	1.14185489946762	-0.143381073146736	0.247733798492769
GTEx	GTEX-13OVG	GTEX-13OVG-0826-SM-5L3D8	SRR1317513		79331624	88.6092613	4.12682085	1	0	0	1	0	0	0	-19.4494740490238	-18.7005359767445	-8.14844880577592	5.22440277222804	-2.31064709658767	-4.86298386800248	1.55820577214134	5.41180470859166	-2.3556758183726	-4.9360011934537	-1.89291547651376	1.28393819893651	-1.9651319528362	1.4049839115837	-2.98245911265964	2.48375868100825	1.34541338474412	5.11989778215066	0.516624420839506	1.01896792769228	1.52517020968661	3.03219696525648	0.839877695446313	-2.03660963015387	-0.18178972264262	-0.806764536008955	-2.85053501063656	2.16430699617443	3.08262942035205	-0.370553346325213	1.79560752460234	-0.602578975749355	-1.85774051486136	0.447242552663531	1.20299814660035
GTEx	GTEX-14A6H	GTEX-14A6H-0326-SM-5NQAN	SRR1317707		101152036	70.42974597	20.85215764	0	1	0	0	0	1	0	-3.54253331978399	12.8418422627371	7.93194962614287	-1.59407978735686	6.21434422885736	11.2168986102664	7.32527879151054	4.3427185793964	-2.47246167109355	1.31132672818633	0.748938945054632	1.45828388018996	0.901595234594114	0.139179663371149	-0.255190869211198	-4.35768673250841	-0.523683790595221	1.88071641693805	-8.5081114923492	2.59430686296674	-2.2186292590048	-2.19022293051874	-1.192563283219	0.586659789375359	3.40339393451158	1.65903157511218	1.03357331933523	1.07656948534635	0.884168126109403	0.305464151349018	0.820506774689197	1.81080500092872	1.57390327641082	0.341251284422468	-0.510319234606717
GTEx	GTEX-13OVG	GTEX-13OVG-0426-SM-5KM2T	SRR1318484		100600744	71.52956245	23.62932028	0	1	0	0	0	1	0	-4.9244869123397	13.551908224191	4.63456696470916	-1.71787423968892	3.61259117724588	5.02332447218668	2.99359686714299	5.97155545986445	-5.82374669646508	-0.716656446684505	-2.27039254729557	1.38805489391069	0.775813281003956	-1.07823871915196	1.52861541492994	1.91902986530271	-0.16606328326837	1.07831748062623	1.0187502477127	-0.679831629564489	-0.102541051007312	0.335767042409502	0.752036207355963	5.2027372452737	-2.31225818871717	0.187963664514095	-1.01953745705178	-0.0160684806210287	2.4653137639211	-0.292442405524917	2.9706686802962	0.40245247659147	-3.69906799743344	-2.06220291275744	-1.58196882421684
GTEx	GTEX-11DYG	GTEX-11DYG-1226-SM-5N9DC	SRR1318541		88231676	91.88713133	1.042568884	1	0	0	1	0	0	0	-21.3685322477135	-21.7519139205123	-11.5539661832634	13.7046089323428	1.04610083797559	5.29877200119862	8.28642457026467	-2.80958845809883	10.2576682246998	-0.983626472985548	5.80684621786746	-4.27575220753039	0.280384201237635	-1.02907925923617	1.28236548036858	1.04423703892459	-0.713426741800284	-2.52712581657702	2.13420933042556	-2.58476131637512	0.741046044076006	1.17548838889155	-2.37237883370762	6.74972579162887	1.01435186704038	-3.51857604880349	-1.4180139072866	-2.98596910768184	-0.465032494638535	4.81565449938428	3.79148231990786	7.59260740018021	0.899542519240995	-1.16421367493614	5.08892236665369
GTEx	GTEX-147JS	GTEX-147JS-1326-SM-5SI6D	SRR1318662		122457570	80.44426	11.22665426	0	1	0	0	0	1	0	-2.3674559638107	16.114407071715	8.79422557815868	0.522998768694745	9.21140678833516	15.916313715949	10.171345434253	11.6719661294091	-1.63594627184544	0.727209401626804	3.20244692469661	-0.725489703719156	-3.10711922887789	3.85981129951053	-0.937517583713166	-3.41131841039237	0.826509065788507	2.93132777492083	-9.11963369675395	0.457728932623621	1.73660560034329	-2.12989347605517	-5.90971923747624	0.803877212278369	5.95326547577522	2.6547065211355	-1.51567681217707	-1.34767943299636	2.03937534435125	-0.443209366516243	0.181748935384686	-2.15844051487114	4.45972720951359	2.16645870369257	1.64476942100235
GTEx	GTEX-11WQK	GTEX-11WQK-0326-SM-5EQL1	SRR1318920		104174128	74.26687363	1.591969169	1	0	0	1	0	0	0	-15.4146428717896	-15.5468188853671	-7.60392516439103	10.743410003596	0.416585021051156	10.9743928217002	6.90730157851447	-20.0623746183501	2.51266063167871	-7.87981098209148	0.768212429781296	1.12604834283271	6.13986897770123	3.48772536180972	8.69230964955404	12.199582881309	12.931693037369	-1.33974127648104	-4.15875382641092	-7.56098252733006	7.13184846057436	-1.07740017667929	2.60123904048999	0.693646630377733	7.29877099846304	-2.58673259352422	-1.3643646439437	0.824212636094497	-2.77524506230446	-4.60937650352458	-0.521907284462729	-1.6520128451458	-6.54519337759763	-1.14287043955848	3.75515198817553
GTEx	GTEX-13O1R	GTEX-13O1R-1226-SM-5J1NU	SRR1319344		91532034	62.2594446	30.20589054	0	1	0	0	0	0	1	-3.89901381566887	9.96853200138317	5.57586018646569	1.0294275372252	-0.793893364697783	2.22206334950415	2.46689936101688	-17.8204334804331	1.17246488068034	-3.45537245354587	-4.94522713304691	3.50802415604296	1.36413241829427	0.308147098230265	-5.82522326069651	-0.883915526392512	-0.0906960714080084	-5.20369216113555	1.71424876505428	2.02399445682886	-4.59046424005573	4.59959732082447	5.63583831340929	-1.3440381880896	-2.45496153576747	1.93314824566983	3.5868317127491	3.36083164791145	-0.376671263292587	-2.71197351507003	0.657147403742857	-3.89513369228282	1.54577867129524	-1.126811918816	1.49352377375828
GTEx	GTEX-QMRM	GTEX-QMRM-0426-SM-4R1K2	SRR1319485		465206046	88.43464988	5.513951983	1	0	0	0	1	0	0	-16.6454661617752	-12.5366322590848	-2.10656272353945	-0.762298229174935	2.03635294175996	0.0357481698209098	-9.71981289549595	5.16921337812792	2.10841688541875	7.94559441336293	-6.19298563875975	1.88202183734724	-4.34389753907819	-0.0675664214732578	0.862327890113871	3.69564394621455	-2.10176722755467	0.261546497112302	-1.47633334821841	0.790790743342673	-5.5299067755604	-1.00758919475982	0.16265794071806	-2.01496402862267	-0.947244991865348	1.6216996422262	1.08067830263204	2.30308838292817	0.00184382017116184	-2.88064974257679	-2.05535779913369	0.0446671913821232	-0.641402056042292	0.243011225288906	2.03122435420402
GTEx	GTEX-13OW8	GTEX-13OW8-1826-SM-5L3H1	SRR1319520		84373888	90.69181451	2.7087717	1	0	0	1	0	0	0	-17.614037585988	-15.3624821919901	-13.2211367101077	15.2931513067704	0.749148726067447	2.18423294319184	0.663419735692748	1.51015640122096	1.73885574556235	-2.68983884328338	-0.0610143628997801	-0.524377831277843	-1.5060467698771	0.695176346837916	-2.62611831908133	2.93913694634448	-0.384690708297331	2.51111550896232	-0.609616531543251	-0.136526261549248	1.97726264746322	2.95046548301814	0.100924347268301	0.308371834106795	-0.151378180007827	-2.20426447557802	-0.629843670393585	0.456110176198365	0.875443737262111	0.915004544723053	1.97019119120341	-0.0801950038162396	-0.272899392061508	3.03081811036773	-2.4328541865392
GTEx	GTEX-Y5LM	GTEX-Y5LM-0226-SM-4VBRM	SRR1320827		124657160	84.59811213	4.780672045	1	0	0	1	0	0	0	-18.9504514445148	-16.5441913627283	-2.15676834106692	-0.175741651062716	-1.26586292598026	-2.28299488320175	-4.79124331183166	-3.77631470480628	-13.3854999068227	-4.97790478285701	-0.400679448003308	1.53955430200354	1.39988021584635	1.35997610975333	3.26537624875188	-5.09794567469838	1.40833580627499	-4.09192457579486	-0.980014668035099	-0.0437042647034854	2.34976124318557	-0.817299666172305	1.43001496799991	0.0805369334840828	2.63252564939973	-1.27436757525402	-4.54285154808444	-0.196221583455763	-0.2426994360419	2.11480959388175	-2.64535688242897	5.65971430159314	1.00362584056719	0.159537880526606	2.04659905046669
GTEx	GTEX-X15G	GTEX-X15G-0426-SM-4PQZ6	SRR1320939		59632172	65.9206309	28.14940231	0	1	0	0	0	0	1	-0.91734856873687	21.6084416601707	0.666192468601648	1.88963532974308	-3.15508958140162	-7.55837091810685	-2.18361438758398	-2.00049930105195	3.17626047762866	0.448166688805959	3.7481249791179	-2.70160204798306	-3.27618643598929	1.63639890484059	0.791851759414108	-0.311970330179793	0.0645273583882588	0.436496160417446	-1.37424544256134	-0.00477692579829665	1.72038214500563	-1.94792800647829	-2.04296055701595	-2.95797802950334	0.399707559867747	0.065417629312147	0.0386892301751348	-0.227702705468038	0.375655718748773	-1.43027071578819	-2.50321588448915	1.67286001015918	1.75987144584773	1.80816355670112	-0.379435172306708
GTEx	GTEX-13N2G	GTEX-13N2G-0526-SM-5MR5L	SRR1321165		103226812	87.80140183	1.498951648	1	0	0	1	0	0	0	-18.8663377891276	-17.4901560326497	-0.316725417680156	0.976267161670759	-2.95492837664401	6.89073068859938	13.2370178547647	-17.4291350699335	0.311151925198729	-7.83807121376112	-0.974273102186689	0.280457313937507	1.30915472932401	-3.92539091323085	3.47551714568677	8.84494736125552	-2.16808695290565	-0.950882084625219	-2.64541082292909	-0.30445556264435	5.21402682499955	1.34097397329212	-0.886533029908645	-5.68059051235458	2.65169879198326	-0.120976405389347	-1.84675453173733	-1.26277861614789	-0.479040148759275	-3.10368204070386	-4.81808224290952	-1.5745790606797	-8.4765857966304	-4.40444402497347	1.84313339498856
GTEx	GTEX-PVOW	GTEX-PVOW-0426-SM-5N9DW	SRR1321225		98323420	52.65665901	39.59615725	0	1	0	0	0	0	1	-2.39452042144266	17.7108359968723	0.778351928506237	3.02189473163488	-0.824034228612596	-5.60408153048266	-1.85438515070277	-1.72999067186813	3.65340826250807	3.15723408881032	0.09433125580236	0.768954457801753	5.23412291720729	-2.22999336974758	-3.95319467636147	-1.12022727360292	0.449363419134554	-0.0832909393193168	-0.208517688271013	1.67895095795154	0.347791175704698	-0.262637066047201	-1.77076038124674	-1.87904769561686	0.0610884080850135	-2.1389438569226	-1.22736577042704	-1.45877566833452	0.520186916200955	-0.963721295287649	-0.92392512664654	-1.08227574922715	0.706633644691984	1.09797727593366	1.51409141632962
GTEx	GTEX-14C5O	GTEX-14C5O-1326-SM-5S2UW	SRR1321283		96978416	23.5476789	71.01646824	0	1	0	0	0	0	1	-2.12836630187659	18.0850364951954	-1.46302163143891	3.95763377557343	-2.11879190819166	-7.51212959089014	-3.06378045943255	-1.49022963951206	1.71551472397971	1.34893452192756	-4.16268385001013	5.01490169361433	9.74896033790149	-4.56023859110598	-3.2744358259088	1.0106593857579	-0.825580521911498	-1.53400038379948	-0.425374411715811	1.08483360076481	-0.317442957422515	1.47759550699625	-0.427796834619097	2.15001395376749	0.524602636681611	0.36471783370537	-0.00673480727209533	-0.0504034367051329	0.593008936778512	-0.826267322677981	0.150102585726379	0.448867172019417	-1.00698511310413	0.231626692134341	0.126259384653039
GTEx	GTEX-145MN	GTEX-145MN-0726-SM-5NQBH	SRR1321420		116529060	67.9903382	24.8221345	0	1	0	0	0	1	0	-1.75339401813809	19.9579635796313	1.60296896037167	1.42108505317364	-2.95417875140989	-7.79062131501582	-1.97728057414968	-2.43339001605007	1.15899368105398	0.0950809473530565	2.44257173951991	-2.22429538390614	-3.97042895629113	1.58033470817689	1.79351303246434	-0.607910766567377	-0.0653123612918982	0.839955101757802	-0.702540695319993	0.0208602003221467	-0.834075442453179	0.0273884768690293	0.227679594984531	0.562367090049358	-0.224440142525728	-0.390170445549429	-0.154563291607901	-0.390473162628074	0.116287265624217	0.336861171630503	0.741415302193877	-0.428933589779618	-0.725941558818597	-0.581256420588375	0.589914477648325
GTEx	GTEX-U3ZH	GTEX-U3ZH-0326-SM-4WWDX	SRR1321505		121013898	64.03245353	27.40461761	0	1	0	0	0	0	1	-1.07328008498542	21.5398651729405	0.426892797548426	2.70417035273019	-2.95944968859898	-8.02508828684199	-1.19373597053242	-2.24779309633604	3.3998620386467	1.42133999250715	3.03215580380662	-1.63760114583276	-1.67096394328293	1.38691365431833	0.141505644817762	-0.323041133668752	1.77639258101182	0.549010461879179	-1.27506860443784	0.49135607741774	1.72065277066445	-3.4046921257107	-1.25275627937517	-3.2342096134829	0.898723154998969	0.0737824552200893	0.226910045405719	0.298934732975295	-1.19171713095952	0.56119111295216	0.099007624229689	-0.8622473791566	-0.179742739698008	0.884059412565604	0.842492886659449
GTEx	GTEX-13SLX	GTEX-13SLX-0926-SM-5S2NM	SRR1321608		72168602	83.56460889	9.75521183	0	1	0	0	0	1	0	-5.18404532920816	12.6161966970909	7.35683516990183	0.60348123221662	7.64465789765103	16.6053209984155	10.8346869579079	3.4665859140203	-1.64838841111764	-0.4262545056296	1.62278431660223	-3.13849359484817	-4.45730098151268	1.61213176456654	-4.09945233875603	0.665288832126224	1.14242267732875	-0.686065891144388	3.41727565008125	-1.07987904894171	0.439790459802038	-0.484885261531193	-2.74980752892529	-4.70231014981738	-0.875577263652609	-2.99490651808041	-3.4012170633188	-0.319184680537438	0.339512401721206	0.0446029533387644	-0.0479788342050846	-1.31566298090031	0.214685824739132	4.30309479668645	-0.328141788933304
GTEx	GTEX-117YW	GTEX-117YW-0226-SM-5N9CM	SRR1322643		91366720	90.95007679	1.569302258	1	0	0	1	0	0	0	-17.9668750252081	-16.136739125673	-14.4078112399046	16.4276197064567	0.347028922386477	2.75018375592515	5.04132800106368	-0.685130767383697	6.18668913837869	0.771063979409088	3.83951347008725	-2.8227544215937	0.386473346933971	-2.59658617142683	-6.18805695446012	10.0111191773628	-0.790274724616915	6.30273983254841	-1.85367922757527	1.30598803814105	-1.95255401376226	1.55968032781723	1.25179337622467	5.28452516768939	-2.27730166722605	-1.52909067751866	0.874554489555736	-0.694604832482756	0.147728336109476	-0.08612253728072	-0.541011110762307	3.242161953589	2.41620046995997	0.427667292655827	1.70698713153777
GTEx	GTEX-Y5V5	GTEX-Y5V5-0726-SM-4VBPY	SRR1323512		131378800	64.37408623	28.38984676	0	1	0	0	0	1	0	-3.2897936399688	16.325354956181	2.38382775677726	1.94973272035454	2.79995412144059	3.73343636099279	3.38741197690803	5.21128348986904	-1.17879412098884	1.20765839550652	-1.64144796716385	0.4196418213819	2.83411919838728	-1.71901005696095	-1.93822832360156	0.42689489430626	-0.492572849484015	-1.09772870245612	1.30218615990833	0.25619485281161	0.711641087968911	1.06953884746099	0.534448047244699	0.668492009527482	-0.446581450880422	-1.60950972231664	-2.39923522898352	-2.18281405203497	-0.191263284900264	0.0178908212855895	-0.866767986377336	-0.441102066396987	0.185748169151138	-0.124739136357883	-0.93669684486372
GTEx	GTEX-11I78	GTEX-11I78-0826-SM-5A5K4	SRR1323628		91416864	70.8404283	23.25610294	0	1	0	0	0	0	1	-0.849052262151593	20.2068346402223	1.52199261812065	1.55734742521601	-4.31810326202334	-8.82060211822072	-2.14624327431686	-3.89243168277573	0.821348117870088	-1.8857181688141	3.05216042027962	-3.46886293131242	-8.13145453659875	4.16754335041695	2.63953666601768	-1.06395914627014	0.449323511224761	0.185218982591838	0.0596426071866771	0.0603998417515735	-2.1224004003697	3.07216451536252	1.59371625894403	1.61125464232847	-0.683235689657961	0.0795593390507638	-0.986127968650811	-2.46639420328952	-0.314359902970441	-0.742498757516704	-0.659131027434952	-0.345276272541169	-0.231418839852812	-0.981607541261761	-0.233537193790973
GTEx	GTEX-WHSB	GTEX-WHSB-0226-SM-4M1XE	SRR1324269		64728596	89.36708592	5.360762035	1	0	0	1	0	0	0	-18.9924984214382	-17.7151529826534	-3.31927620584663	-0.588729850456057	-1.74545192510276	-5.37138273690207	-3.82879501000807	6.38070634841608	-2.6976693530109	-5.99319213966089	-0.435288164746658	0.0637233266740681	-0.38709529087821	0.685411384653512	-1.92973595355102	0.155124627689243	1.25873008883653	3.13587437899615	0.221783415782825	1.33032927729844	1.03514504844295	3.20086808117503	1.91350974733405	-1.81334640804842	0.0634334957359325	-0.394378182047378	-4.02631861155404	1.9472153170708	2.14784037728959	-0.596945526591258	0.514097490824035	1.63809761074232	-0.611743950363037	2.92631029045815	2.35405514004449
GTEx	GTEX-13O3P	GTEX-13O3P-1426-SM-5L3DT	SRR1324545		70752370	77.14726447	13.69565995	0	1	0	0	0	1	0	-4.75166361418308	16.5386419411877	6.24697323204857	0.248922226918485	5.06960935038193	11.799332253166	8.18710198769698	0.87004844906233	-4.28346575442748	-1.4728451412256	-0.930857388035098	-0.729199526183434	-1.2244034722517	0.337283109216665	3.53342651921984	-1.22763314300969	1.07030358917916	1.2288827353007	1.67963050519841	0.737200821406361	-2.7191807977842	1.68620358389275	0.505998940206393	-2.09217839540561	0.0952640237751643	-1.61501228557965	0.448604301047838	1.45371778257624	-0.681895671253293	2.30715793489214	-0.013199870037844	2.11960837118773	3.76195526146069	1.8752419912841	-0.504434610509782
GTEx	GTEX-YEC3	GTEX-YEC3-0426-SM-4YCEP	SRR1325247		126912148	58.5299226	34.37425549	0	1	0	0	0	1	0	-2.6886032646273	19.7341153942445	3.0154899709658	0.31904997102401	2.46368574475842	2.18810664245988	3.15922318933708	8.29230791894938	-5.92955322467732	0.488827554659523	-1.29413664885365	0.927381872033313	1.68345427241136	-2.14386290328891	3.26558713066314	2.75281450206385	-0.646860692383988	-0.303834156511978	0.277107583448998	-0.89339982998809	1.41726448833132	-1.20302145404985	0.80973320046386	3.94501041563796	-0.68788875056289	0.447489863973408	1.93175110295931	0.619860429399085	-1.64235974821447	-0.510944141981574	0.205983609224016	1.42921437337864	-1.16471141191523	-0.457005664784564	0.257190962417596
GTEx	GTEX-13N11	GTEX-13N11-0426-SM-5KM3O	SRR1325464		95280986	62.91173561	32.22009268	0	1	0	0	0	0	1	-1.28382734462472	20.7388910625402	-0.275389021291794	2.33549357086075	-2.97290642796442	-7.92944358688027	-2.07201453087787	-1.58631774095175	2.26248416952643	1.17677621499333	1.83799820721474	-0.513261241094218	-0.718690099632694	-0.3435821020585	0.674591567993349	-0.085739424302106	0.238468474443973	0.218870740921986	-0.512520304665621	0.600155160776128	0.9125359649143	-1.62746124420138	-0.574049149542074	-1.27356294920956	0.0274080505233415	0.498165756225545	1.22221979538612	0.721793511436095	-0.418966763280025	0.659128142449022	0.885116530843052	-0.420880831060602	-2.35257815160495	0.130212091247265	-0.638917962377787
GTEx	GTEX-ZLFU	GTEX-ZLFU-0226-SM-4WWFH	SRR1325504		113363222	62.90894943	31.60993254	0	1	0	0	0	0	1	-1.07087284399468	21.3984176308926	0.109757343581728	1.98381768483331	-3.86237746169453	-8.24825663073187	-1.25521886519528	-3.16069133553694	1.74809643624041	-1.22382960347504	2.44333048836353	-1.35321814572798	-4.12145291052532	1.41479975036049	1.0032258397888	-0.0795934132887577	0.460433822209225	1.10175834671728	1.18950837463997	-0.291069793176089	0.174275939258118	-1.73585267045749	-0.468717815478455	0.634263670679176	-0.6669449456314	0.983956039013836	0.260412453166475	0.478904025604461	1.37042597105525	0.431723236124553	-0.372491526554668	0.403691401063118	-1.53831045676986	0.925961898065266	-1.09615861472648
GTEx	GTEX-12WSK	GTEX-12WSK-0426-SM-5GCNS	SRR1325771		72904006	89.68499207	3.087281651	1	0	0	1	0	0	0	-18.2310952173383	-15.1597714881258	-13.2091997848708	12.668357384456	-1.50425353635718	-3.5477823153709	-1.99892730865605	4.77507410963465	-4.94430762195864	-3.36128449730845	1.81322113967279	0.556266133606792	0.786428407407679	0.6600992465294	1.49277439666654	-4.48036688496352	1.10720286187827	-2.70261044693331	3.63009980277842	-2.76956932438909	1.02668507635955	3.85460966681815	-3.3275192584056	-0.477017375261495	4.16966922434468	1.02938018824177	-1.53710518817583	0.655449215504336	-0.40437675411225	3.43753524369171	3.61515066666008	3.12062616423495	0.0915051559351106	2.01849546958063	-1.64222295883782
GTEx	GTEX-13FLV	GTEX-13FLV-0926-SM-5L3DZ	SRR1326040		95118492	65.81800729	24.36354857	0	1	0	0	0	0	1	-3.58018454981097	17.994823378506	3.15930830529898	0.0180951425783588	-1.92343195749639	-4.76311821987297	1.76616797803728	-2.69450165733405	7.2031646865023	-1.168707156951	3.71616957496168	-3.19665373994224	-2.19200892718374	2.50303602955321	-4.47761176275553	-0.816207868304592	0.396534326231143	-0.923213786919375	2.11373829168077	-0.466121174452585	0.782610920443737	-1.08557074873619	-2.28140612721307	-5.49267644394955	-1.02370474110037	-2.25303203709861	-3.23309887139982	-0.768731310213175	3.02746412970389	0.699169083324923	-2.04272928058673	-2.73181901750445	2.28924820578924	-0.683251178486491	0.859265702738276
GTEx	GTEX-YF7O	GTEX-YF7O-0426-SM-5P9FS	SRR1326343		140778234	76.38587795	19.20547036	0	1	0	0	0	0	1	-0.386787474184338	17.9775633086553	1.82919192258361	0.904831971394036	-4.45914387632671	-7.46374277820922	-0.75193146634732	-6.03598620502812	-1.51947943624952	-2.87430114347354	0.574318786374558	-2.9967160363851	-9.68624940573055	5.79769490090532	3.17067460558599	-0.663555017888924	0.0903387237133146	-1.69012090236557	0.894526517067561	-0.324835549021836	-5.14919939911911	10.1237377417553	2.33364072066251	5.77588985101354	-1.33009800042059	-2.39684681846204	-1.97142588636696	-4.93315751651894	0.662388739941989	-0.842154500768814	0.180384818507197	-3.41378521091837	-0.163619154575574	-3.66586366972482	1.18833704639178
GTEx	GTEX-1122O	GTEX-1122O-0826-SM-5GICV	SRR1326687		85161858	61.2323935	32.81055	0	1	0	0	0	0	1	-1.12570674518404	20.5525041134476	0.60539807136057	1.57318551877236	-3.18852940093675	-7.68479074589161	-2.82159689090833	-1.55958116536187	0.849321878638886	-1.0113137181437	1.82907998361244	-1.68840705010276	-3.18530524146448	1.08833410613858	1.78053102353853	0.398238698539541	-0.28196628056177	-0.15932563654933	-0.639030672269121	0.154922704408115	-0.0164419798131845	0.106670279211754	0.0995697676280731	1.63060999290618	-0.470966391414943	0.190147892514787	0.453972901578783	-0.309600332031507	0.114133009929591	-1.38960271815214	-0.644340762362256	1.31258985788707	-0.221943440122191	0.579032934445737	-0.745971440945009
GTEx	GTEX-WHWD	GTEX-WHWD-0226-SM-4OORT	SRR1327473		91219472	88.43077715	5.982512155	1	0	0	0	1	0	0	-14.1319418628963	-9.24540796884815	-6.85075250072432	6.81603267498536	0.907518343303858	-2.10608222029371	-8.19452337536541	5.41302267072149	1.23500273309632	8.84708030512126	-10.1982193149932	3.85777381493509	-4.51143850092769	-0.00560292360409646	1.69357379022225	1.91454178296985	-1.441547125915	-0.86659037374543	0.636793876909335	-0.246626493636917	-6.71872780022416	-1.96807230250244	-4.08771456926518	-2.41247689583046	1.2560874869365	1.24018865796833	1.6386817963088	-0.637963147950759	-1.5178141028628	-1.563255819401	-0.745683927246563	-1.50742184870218	0.223490075714488	0.68704729717536	0.441111155544599
GTEx	GTEX-QLQ7	GTEX-QLQ7-0326-SM-4R1JV	SRR1327855		66529654	86.96352757	5.419381859	1	0	0	0	1	0	0	-28.6840691072608	-28.2214259764663	19.6951846198041	-41.0330720366103	-11.7672158548484	-16.0305296733358	20.3245713740797	11.5697042745672	21.0226458381992	-4.25335740590233	-7.04080224967235	2.60179729388026	-0.936186641888609	-0.00949988956777861	2.76024870101739	2.55420036586572	-0.162012312101452	-4.35368082242859	4.60941614486033	-1.96286797260112	1.07796178558023	-0.264895611972255	-1.01578625633741	0.174710671084179	-2.28267545637711	-1.58480483354116	0.986516883419294	1.69926852326552	0.918995247394163	0.88884816470316	-0.182084302172913	-0.05534530011835	1.70200319548022	-0.322755670221466	-1.27044150662502
GTEx	GTEX-YEC3	GTEX-YEC3-0326-SM-5IFJJ	SRR1327933		74465736	84.18779612	9.485275214	1	0	0	0	1	0	0	-16.7756224878352	-8.3714453370259	15.2513950110094	-17.2192385468305	10.2800263119525	10.812534370539	-37.308064469259	4.05973035244515	5.73358574808766	-5.76585590200759	10.0014005088767	-7.06057479856929	0.835145214915375	-1.65715557656864	2.47658247485905	5.24041344913749	-0.827003433665642	1.84456114387117	4.80110851942727	-2.36721076675128	9.03923351490448	6.87975175505613	2.37923244457564	-1.15388550792283	-0.275345514819096	7.45724452772817	0.627761411199483	4.5267534814774	0.663593200435665	-2.6755757816472	1.08987870490592	0.382593257306586	-1.23344965191578	-1.05241125597391	0.466638895714508
GTEx	GTEX-WYJK	GTEX-WYJK-0926-SM-4ONCF	SRR1328073		81586140	86.74306935	6.576266508	1	0	0	0	1	0	0	-15.3408374527657	-8.30094347001072	-6.09451507606746	5.60574024079983	2.27097935134097	1.06195435032585	-9.81736442193255	4.56852372619211	2.43223861802504	7.69064491021829	-6.4242463155492	3.22567472915039	-2.77578931073107	0.795506678728161	1.2710336512305	1.91929017689451	0.438022399829715	2.44806326270605	4.52875627430972	-4.70714825881582	-2.83667705288175	-2.32174714620558	-3.54511840784599	2.00198664111447	-3.45589189058049	1.64471364195539	-2.80219284997586	1.74150197481307	3.0255952721482	-0.11580950868901	6.2341847385378	-4.28207802539198	0.764340468075005	4.81711575155976	-0.744540883146355
GTEx	GTEX-13FHO	GTEX-13FHO-1626-SM-5IJGB	SRR1328780		130776180	89.77214811	2.548454925	1	0	0	1	0	0	0	-17.4241083207461	-15.1306658374357	-12.2109324113589	14.9165228412468	1.37200775251178	4.34311806547713	2.98751446304231	-5.1045904091808	3.748687218442	-0.504124924174148	5.66705306938641	-1.44201630969418	4.46037823027535	-6.28840286744964	12.7398494972671	-0.229859514383523	-2.45462090318454	1.69547753291763	1.33574920284059	0.173230038668132	-1.11064108131781	-0.708787933844104	-1.96959003334834	-1.39491229242401	0.257816685802197	1.63442778266413	0.0798807829883433	-0.0969301790989012	0.434387830063971	-1.35594746228835	2.85049768089711	-4.62606898660376	-3.90096427521923	-0.330254452019223	-1.25320067178639
GTEx	GTEX-ZQUD	GTEX-ZQUD-1526-SM-51MRE	SRR1329177		115579016	38.80336894	54.09615185	0	1	0	0	0	0	1	-1.66711657069456	21.7275355316367	-0.939241212339051	3.66136950618339	-3.13325193626616	-9.15862071338161	-2.44244783555228	-0.878887917563903	1.84250412569045	1.04217788935102	-0.969130402124755	2.46052796206308	4.06644383049738	-2.55715171799481	-1.17057690970396	1.01028187071139	-0.488857143075131	-0.672873761089838	-1.0944832225884	0.174852087442621	1.5914536380915	-2.25695775356577	0.496887120734241	0.195446009404864	1.44317084730966	1.47938375160985	2.04004642759677	1.04174864472148	-0.288036700384742	1.40841815627729	1.76514973319155	-1.09702944001452	-2.5464077163718	-1.65887851978767	1.46920778960898
GTEx	GTEX-X4EP	GTEX-X4EP-1426-SM-4PQZP	SRR1329575		83465870	91.00660186	1.598284425	1	0	0	1	0	0	0	-20.3075317035259	-21.8546276572472	-14.2556051461487	15.3004161694681	-0.0210893715644001	4.17855357176692	5.7836928046109	-2.14591781422972	7.33580834964028	-2.55834694921744	7.79346421441847	-3.20577545418798	3.66233158843137	-5.57441477290539	14.1545907117044	-1.63072358404727	-1.00264440964444	3.24902269705566	2.05872340238697	1.72027178364642	-5.06298046193475	1.50077955476851	-3.73602830713594	-4.2000953493621	1.46686835734131	1.12426828086481	3.38905119866015	-0.62963606842626	-0.83045573514791	-3.06109195825364	-0.0662071514130672	-6.31176568974539	-4.35287676500929	1.29491815837527	-4.95254823028034
GTEx	GTEX-13QBU	GTEX-13QBU-0326-SM-5LU3F	SRR1329624		82138268	87.10928017	6.432765298	1	0	0	1	0	0	0	-17.2833620778168	-13.8448237235769	-9.40772341644863	8.00392982019683	-1.01448201988241	-2.882227096039	-2.82509079277877	1.37470630987485	-7.05944265637146	-2.7701909987596	-1.52606546848496	2.30589411713751	-0.39644378481623	0.205895200057469	-0.590366507387682	0.0266169612316909	-0.713394069805328	1.82010889888246	-1.08061129259004	1.29829527820031	1.99591129293748	0.380277752355122	0.266482377740772	-0.247802635242815	-0.639724588987834	-1.0610700885481	0.270485148480988	0.417170576598363	-0.441364427323936	-0.0201174641521811	0.796933004009273	-0.626517330673344	0.578526785712445	1.65627342862841	0.0878855812086295
GTEx	GTEX-ZPIC	GTEX-ZPIC-0826-SM-4WWFJ	SRR1330153		106970884	71.4376484	21.00989649	0	1	0	0	0	0	1	-1.44557835020963	16.8971730536781	2.1588342787255	0.411386763473461	-3.46875630613026	-5.47066255113871	-2.54657308146747	-5.16144769812558	-0.827932329790912	-3.4523992831968	-0.554203317135096	-1.03004049588023	-4.30829743461053	3.36703909961898	2.24681227992738	0.392779957509782	0.00327625167110123	-2.22616430908697	0.897149064635315	-0.249656138538636	-5.11457401751426	9.83272778144269	3.13619930067847	5.51919555622409	-1.26803499814143	-1.10965765809247	-0.411847042665511	-4.76784652192226	-0.371536009177378	-0.16817493971728	0.986207002232507	-4.63754593697304	0.974104353760625	-5.54319975734391	-0.278894634631537
GTEx	GTEX-1477Z	GTEX-1477Z-1126-SM-5P9GK	SRR1330633		117491624	75.97135265	15.49403726	0	1	0	0	0	1	0	-4.64651526903272	14.0868963440925	4.07612569405847	2.07718935225048	5.93442934870152	11.4464744259161	5.84073240472263	2.63179773888757	-0.036174456108568	1.57462800759692	-0.370857864053261	-0.216004360913991	1.12248801207479	-1.8835118003185	1.98751327596582	-0.0314527146354149	1.45635007861262	3.9225212953379	2.91016821446117	0.777715971020129	-0.227401675738157	4.27980539550685	0.543366850894954	-2.27112769905961	0.0416836880585658	-2.01435218729901	-2.00204315596765	0.959134551614823	0.365779645291634	1.28037448407944	1.12749514299461	1.38330959325929	0.169472414107189	2.06257323758739	-1.18617825865966
GTEx	GTEX-146FR	GTEX-146FR-0926-SM-5QGPE	SRR1330944		97308088	67.82820561	27.66164926	0	1	0	0	0	1	0	-5.20603127329696	15.7186371562421	6.04130465549436	-3.52615678443058	3.97072087331089	6.80325702477093	1.83897638912956	8.79074377360754	-7.39150470327668	-3.28577956394473	0.953330188327864	-1.68958487587178	-0.608581264401669	-0.584308655266688	0.279483238664547	4.24174372247028	-0.691061186898765	-2.19471114347905	1.33766219286566	-1.99172488755991	-0.317670940922484	-0.104150938297994	-0.312779960876986	3.02664626581483	-1.30589746490567	-1.5642553255173	-1.0506550807657	-0.948608788981462	0.919604705425128	-0.0209958005297518	-1.14093970077633	-0.934193944103167	0.266799030757855	-0.979709996685316	-1.29442360685187
GTEx	GTEX-147F4	GTEX-147F4-1226-SM-5NQAY	SRR1330965		106283492	28.03616012	65.69504886	0	1	0	0	0	0	1	-2.75488475084687	17.9734852176133	-0.809883296398846	3.88536550395282	-1.56474610383804	-6.03088507508803	-1.89460888096621	-2.37909512035802	2.65537830050018	1.84266143474994	-3.25295875514204	4.28733998769416	9.35238721554784	-4.37356624154424	-5.04420237180759	0.523765213152209	-0.538779185709658	-0.70677228436544	0.384381230204978	0.858102896108126	0.117455611714492	-0.0094035801628407	-0.0548585724841221	0.481811233970248	1.32920854933434	-0.0374248898182438	0.389930334184737	0.11770386287405	0.00734440928462204	1.53449823910816	1.74155796013953	-1.20786045589885	-1.33353329301174	-1.78060420977482	-0.070733834763755
GTEx	GTEX-14BMV	GTEX-14BMV-1026-SM-5SI6B	SRR1331013		111829926	68.62551979	24.86165823	0	1	0	0	0	1	0	-2.81344418383982	21.1139396772712	3.55315384923534	2.47258564182031	4.35424973249998	10.4810982898116	8.6161899329664	5.47994211410962	-1.01590818394618	-1.82635190406023	2.89073591189626	-3.37976418366214	-3.47438486858493	1.31978216838975	-2.21659600632884	3.57011734957639	-0.292139738716188	-2.60119230664002	5.16533533558095	-3.86777078297061	1.93654624979228	-0.134256112997804	-3.49069561250941	-2.32453455187636	0.705675434442961	-2.1908751560457	-3.45806756331241	-0.136770717801435	2.23577676557766	0.859263178663234	-1.17089082551978	-5.39176601817593	3.93790946391615	1.13588147669807	-0.787126717789317
GTEx	GTEX-117YX	GTEX-117YX-1126-SM-5H128	SRR1331444		98953650	57.64208597	37.30489376	0	1	0	0	0	0	1	-0.59279802253227	22.1461015984037	-0.484096355805591	2.96921271932653	-3.45051951468577	-8.73830936648483	-1.46770630471696	-1.05888254116494	1.53212988684374	-0.436092037022662	1.99172851057534	-1.12524426558793	-3.01008777373557	0.749340935543983	1.7056015688555	0.729823857577127	-0.376042357767153	0.272640380205435	-0.596922089865937	-0.0466906101140508	1.30800717860643	-1.74712016762373	-1.33478634059895	0.599632016834151	-0.354687342076636	0.63124117254647	-0.213051034277089	0.0622967634143164	0.488759311871891	-0.946079423275522	-0.910202516765192	1.16960399032109	-0.941353565114023	1.34379798891407	-0.514534652853522
GTEx	GTEX-ZTPG	GTEX-ZTPG-0726-SM-5DUXP	SRR1332187		84774258	80.54951304	10.14868688	1	0	0	1	0	0	0	-14.5652701963474	-8.71622690040947	10.8833012216238	-12.0379823137247	2.85904179650077	5.95873269475026	-13.3376179773118	-4.59738859495646	10.933897867494	-17.3950377092605	3.31669004378057	-1.20956232131413	5.42104347022579	-4.62915287462516	3.01551364276748	3.8785722215806	-0.574875203065241	-2.91139013220985	-0.492658504810517	2.09621849429214	-0.125581007445306	2.35442308849558	2.08329246842902	-4.75728886806862	1.77569241670216	-5.25699940731354	1.40254939867529	0.228679353766546	-1.48203833325846	4.7785414897319	0.75323689648877	2.94420370240181	4.29409523084615	1.59167097961465	-6.50754017474668
GTEx	GTEX-YEC3	GTEX-YEC3-0526-SM-4YCF2	SRR1332208		74820706	86.98055054	4.120757695	1	0	0	1	0	0	0	-21.9507478561724	-23.5924990606528	-3.99437056551036	-2.59240423045511	-3.71208207395958	-8.34600126449718	0.573176845679388	8.87018242527962	-6.85740783318065	-0.235596196245638	-1.12416755342888	0.383497052533472	-4.08720192649143	1.43098981595428	-4.41121627394443	1.6479836067181	0.183064217737944	7.18627199268561	-0.794816139674393	2.27209260597007	-1.74887490717382	0.979799406498319	6.539218355564	-1.98293387653048	-1.66810698495749	4.34367375310829	-6.11284972663741	1.10293440369086	-2.78838115100093	-2.38987797378865	-1.16062580834729	1.62308955860043	-0.38868038818775	4.04884655328814	5.39783417836934
GTEx	GTEX-11P82	GTEX-11P82-0126-SM-5HL72	SRR1332488		82705670	86.75453327	6.355506219	1	0	0	1	0	0	0	-15.5834015162993	-11.715917318284	-10.6318667611829	11.1849258014614	0.138811963614893	-2.32079425488413	-6.21943932239532	3.86639526668329	-5.63587401668951	-5.28509721198605	0.780849995041376	1.24106428511607	3.51537645139351	0.61907224644709	3.72439622624257	-8.56653856834165	1.64024904034702	-6.11441167952689	2.0748644912397	-1.80859341097551	3.21165269386985	-0.740628312895747	-1.67826069250798	0.9400365892793	0.221448833490626	-0.760218053299611	1.16728639731869	0.425824943546591	1.6691804129968	0.912885755163519	1.86949489123911	-1.52325305960094	0.334499497913869	1.15041420335704	1.48446067255312
GTEx	GTEX-13FTZ	GTEX-13FTZ-0226-SM-5K7X6	SRR1332607		91505324	38.85557085	52.71228371	0	1	0	0	0	0	1	-2.92070199647759	17.9642326434791	0.12931906620208	3.25334219619278	-0.155258325587536	-3.38356342199503	-1.00341256346388	-0.638518445069665	3.53090811398485	2.49400267523944	-0.823277657985777	1.73511607553827	6.04357204680341	-2.58421215835829	-5.60046213731331	-0.254613358799992	0.0776625434697947	-0.767741082091252	0.42111247014086	0.816385055677824	1.84837024666722	-1.35152617977715	-1.13000065065483	-1.09743667799907	0.70921946069673	-1.57048429605397	-1.42421672796242	-0.716999880205802	0.513690135726427	0.506413941868709	0.386471460641022	-1.60617204830863	0.609894659465967	-1.62727831514968	1.60303542964562
GTEx	GTEX-13O61	GTEX-13O61-0326-SM-5KM2O	SRR1332694		93506706	88.36686644	5.610605083	1	0	0	1	0	0	0	-20.2762969978471	-19.9199196225477	-7.28066167919113	4.43642132418524	-2.19406081756137	-3.80619807359502	1.59804505342635	2.58397207513139	-6.46414492013221	-5.80675975409148	-2.75788072272516	1.59284969273376	-4.57157184353072	3.25369793659058	-8.03919211307381	4.39665624715185	0.950107779332798	4.74939744536864	0.457878409739416	-0.044528797892643	1.57808137018697	1.51503499063124	0.816481137306267	-1.13550022725567	0.359539112348376	0.0444820211126814	-2.10429324224963	2.04830290385237	2.38477480507145	0.45472465161338	0.483327953779283	1.1821575940604	-0.515382632598225	-0.564488311313896	-0.366540420898404
GTEx	GTEX-139D8	GTEX-139D8-1226-SM-5L3ED	SRR1332816		89727448	80.70607112	1.26792417	1	0	0	1	0	0	0	-14.9692163437419	-10.4110150252682	-11.7971800432316	13.5018256106572	2.4435332823125	0.295652934235253	-2.60331712639295	1.82874124541208	3.33727881506711	2.49882771704517	4.24555549757744	-0.477349858440979	5.53039214944941	-3.00933764920709	9.18058704720043	-6.80608521563369	-0.690932987261309	-0.385796434243097	4.61033821342585	0.0579620682251701	-5.48590725724742	0.416983525388292	-1.76374580073779	-2.85006542107394	-0.387730956902984	3.83389807641251	1.02980792790824	2.23711201595756	2.67290589314819	-0.777141350077325	-3.58416800849902	-2.14696280927745	5.40341062802792	-3.09047252577897	5.13114460605344
GTEx	GTEX-13112	GTEX-13112-0526-SM-5EQ4S	SRR1332835		91906988	57.19060884	35.13237971	0	1	0	0	0	1	0	-3.47720461830985	15.6180046276031	2.44734729745108	1.8910170854597	3.42911428674028	2.9057295553661	0.768012580850643	5.17186219735812	0.897775942701453	3.95044176377115	-1.55449471241315	2.11822751416728	5.21827294399501	-1.89658141776203	-2.53729047750527	-0.763165523962244	-0.414997762608289	0.473213885722761	-1.68177333941741	1.41595619199476	1.95745451154678	1.6310760566796	-0.757774954582016	0.592726551872546	1.60811530815218	0.844979742608806	1.10810965221778	-1.0033497084013	-0.672140030822019	-0.87745117451768	-0.38824219203888	-0.0462983414177045	0.0250812166753066	0.192725614808497	2.03053703697884
GTEx	GTEX-131YS	GTEX-131YS-1226-SM-5K7VE	SRR1332928		94861198	89.33833832	2.507008187	1	0	0	0	1	0	0	-21.0906854338962	-20.8204394320743	0.354976312868134	-3.34623007771761	-0.87690482234884	4.1867939702132	7.94152476125162	-6.04302883729905	4.43428350676681	20.8598670225955	1.35110036281304	-5.1605437567145	-5.23375596440368	-2.79972691625437	-3.32653558205277	13.1630088657776	-2.77641271758904	-3.65702085415097	-2.32417720570602	-1.97720465044658	-4.23302142337435	-0.0363809943112415	-5.54048092590936	0.162537740806995	1.58823320478344	-0.0566483304655649	-2.71027443893907	-0.174133921705388	1.15661193051161	0.618949722324346	1.52039716556566	3.57673984699159	-3.76321728233534	0.202702572707944	-5.22913937132219
GTEx	GTEX-Y3IK	GTEX-Y3IK-0726-SM-4WWE5	SRR1332993		100940264	84.91858313	5.842556544	1	0	0	1	0	0	0	-18.8907346246455	-17.3166872759335	-9.39526726521884	8.31223542296983	-1.27479513167687	-2.33777565014158	2.10090096850526	3.82413637149492	-0.457214120751287	1.65446360074619	0.0790791161407348	-1.16217584740609	-1.42805211148473	1.63674623964639	-6.79012911098362	1.86863002024465	0.810815216753558	0.144569745170932	-2.61033238926338	1.59989522189716	-1.24254099554368	0.333223555107359	3.79564416878106	-1.72169116044303	0.117977176246727	-1.13676501033243	2.86186120436989	0.895969932910471	-1.62399342643194	1.75818907933762	-0.518244698500233	-0.773183488476512	-1.83448112842516	-2.42304439443245	-4.6591120710593
GTEx	GTEX-14A5I	GTEX-14A5I-1026-SM-5Q5E3	SRR1333414		106255228	72.2768314	19.17112634	0	1	0	0	0	1	0	-4.99973104108893	12.5941693493327	6.19828899111194	0.230331790375455	6.20513197626065	10.7218572769171	1.63692663611523	2.91365295400782	-0.635301444843381	2.09365288987697	-2.03858142795613	1.98031429622888	2.24362982420413	-0.557959964322505	2.18362199169891	-1.89993290405159	0.827138980556893	3.69397238939355	3.09904089599669	0.921867349012891	2.04572881830161	3.32506022604277	3.67771617175778	-1.05777855661417	-0.55428574854903	2.79061273085505	-1.905033860671	0.270949383303246	-1.8060470939872	2.79216064489356	-0.376083188684428	2.92047802472672	-0.0135369394012765	0.41220390708025	-1.98411123473761
GTEx	GTEX-ZVT2	GTEX-ZVT2-0926-SM-5GICE	SRR1334154		78652230	62.44850273	31.85231747	0	1	0	0	0	1	0	-5.6289084212968	15.0578101470534	6.53599889992203	-5.5086523189405	3.19772943717712	3.65630558847213	-1.07194828237144	7.68251695764656	-6.07408126368779	-3.04307105734356	1.15027900106818	-0.502199697584321	1.78859718740488	-3.17225764402541	2.46309649469776	5.7444798774114	-1.3513400421796	-1.53667127482777	-0.166992831428178	-0.738771188245561	0.0531317924940719	-0.671777480164217	-0.137669077073713	3.10501434540461	0.0426516723400202	0.357768028904858	2.84027824350983	0.619869951684989	-1.98245826034999	-0.913364487981656	-0.151899652189349	0.292548288431488	-0.608580276820488	0.0480529902653632	0.399064769806792
GTEx	GTEX-U3ZH	GTEX-U3ZH-0326-SM-51MS7	SRR1334338		136308342	57.37166108	33.93565597	0	1	0	0	0	0	1	-1.25149217626052	21.3589228773338	-0.0957379401485418	3.03394673932613	-2.96971857514535	-8.13761992206474	-1.41920014374265	-2.03725672458217	3.03601314633415	1.39483932416243	1.5402815152106	-0.49376622092703	0.0738340650541715	-0.334083273412269	-0.782956860300687	-0.0379729816367933	0.182171506330263	-0.126677246355626	-1.14388755518749	0.897607966088328	1.53008488323148	-2.343368089386	-1.22841865414841	-2.49419422524512	0.787003374918245	0.0468800068121588	0.475926856075873	0.0459186194084331	-0.241431962662354	0.735247162777947	0.206017132439203	-0.569359775977581	-0.220861597107926	0.533056656957833	1.11504009075384
GTEx	GTEX-11ZTS	GTEX-11ZTS-0826-SM-5EQ49	SRR1334419		95054770	89.20723494	2.665953534	1	0	0	1	0	0	0	-16.7340553489553	-15.7954197560571	-11.48525649431	12.8947644005686	1.07981399703442	0.697684399940891	1.05022376463772	4.40194248074078	4.36421893996844	1.52602950304734	1.63796935002942	-2.17878405595165	-0.445024808825636	1.55801247452925	-5.47679917070627	-0.579615004194721	0.823714445827695	-1.02188608545507	-1.03974045028069	0.319322488600514	-2.26910541157404	1.62881347889957	0.658263461914815	2.27137497052737	1.79432237953641	-2.58642929762278	1.93616336218744	-0.22871203213472	-2.53846512653958	2.57550767120004	-0.0199058312999776	3.48172712718414	1.85090673170751	2.02688570595461	-2.05158909958398
GTEx	GTEX-13PVR	GTEX-13PVR-0826-SM-5S2PV	SRR1334670		71923926	89.58913617	5.085275795	1	0	0	1	0	0	0	-17.9865161528761	-15.6773254326818	-10.7127451868727	10.5476818832439	-1.78055137190001	-3.24401386875744	-0.349813639155944	2.9331115314694	-6.25224616883717	-5.61332782764296	-1.87269756929779	1.06516554759098	-3.01624340141177	2.57564262937954	-13.2150802359059	5.27925957789616	0.700284853027993	5.11111796246453	-1.37143468922573	0.876627365456199	2.12860125689777	3.64217935109186	2.66532987326694	0.0495556993696706	-1.60310711286834	-0.0704583724955175	-0.577064814421298	0.822924691080436	0.92601041320135	-0.0781629656918074	0.301579403342875	1.61468595529211	1.48156086268172	1.31520621375033	-2.66075643081964
GTEx	GTEX-148VI	GTEX-148VI-0326-SM-5RQK7	SRR1334919		70335220	49.26189184	45.89363053	0	1	0	0	0	0	1	-1.73320853320278	19.8154593588684	-0.695797977021444	3.3777705088957	-2.54893434139566	-7.65015206422624	-1.9064578965976	-2.04390477691302	2.65334855366958	1.75556315769424	-0.934166914906582	1.95771935115731	4.75672378961235	-2.17231906032517	-2.38180414290809	0.148781135220893	-0.0382063812774326	-0.688509680157971	-0.698209442172345	1.33813056528011	0.0309641698398372	-0.182893286860978	-0.567564337924324	0.0516923670428797	-0.155665696030862	-0.379142172814515	0.212853602074781	-0.666935016308939	0.171779955226216	-0.389669811280235	0.171178917826387	-0.34047809004133	0.290242359385979	0.782543394531302	-0.428293282409498
GTEx	GTEX-WFG8	GTEX-WFG8-0826-SM-4LVN5	SRR1335113		87060208	84.81919317	6.48255745	1	0	0	1	0	0	0	-17.5204025214313	-15.530330996581	2.53749121754933	-4.75820437313781	1.64518796129689	0.253263033702118	-7.53325316624655	-2.87783058308999	-6.39047817627159	-5.37860707919059	-2.41716098393454	1.95071766367609	-0.273200224936517	0.887135817365474	0.518850174220449	-1.44737267238434	1.0838191457398	-0.0659690040382217	-4.195266477677	2.56268288556264	2.3691602547344	-0.068654254161924	-0.0140837977817859	-0.108998931420237	-0.0295618031908051	-4.63619055430634	-2.79533963597802	-1.88560046254705	0.946340646255024	0.513405413398877	1.2280272108497	0.69395662844845	0.43230423620417	1.15824241975655	0.96830270216052
GTEx	GTEX-14ASI	GTEX-14ASI-0826-SM-5Q5EB	SRR1335164		117577062	74.84953485	14.30986258	0	1	0	0	0	1	0	-1.63173308082779	19.6677930610281	4.63005679741452	2.12452109835997	7.5347480217195	13.0480735562862	9.43651131681024	11.0067138151946	0.180959782540116	2.67952234974947	3.90216545036379	-2.98974246890179	-3.15175038743993	1.16771728154425	-1.98784030739501	1.40406503298289	0.875497053470299	1.22895632594918	2.63862071515196	-1.7359823186041	6.01265701497559	-2.95846038114492	-2.74104122591983	-4.46922503871592	0.698672904430454	-1.08885421266637	-2.34051292736819	-1.29720093191558	-1.8682004574145	1.09441122581865	-3.00228614944332	-3.20727409013378	4.45556701479491	1.06964603714124	2.21454080393311
GTEx	GTEX-WHSE	GTEX-WHSE-0826-SM-4SOJU	SRR1335627		84398996	62.651705	29.01039012	0	1	0	0	0	1	0	-4.37232917815274	13.6332336447325	6.08513160796932	2.43041467652409	3.79556697033648	11.4695210970555	6.18808152130586	-9.61415070108435	0.723898948924406	-4.56476540430086	-4.44816200538816	2.74874848582361	1.37532431949303	0.325284122228123	-4.43902846518897	1.35339507266857	-0.717297311692224	-6.39948913708635	2.20995121179949	-0.898310226368007	-2.11998382029409	2.15972053884556	0.573805256437352	-2.35959428132416	0.0350282587152087	2.63742842132422	-0.480681180038174	2.82468312177245	-1.57738670162829	-2.88380166178697	1.13696619546275	0.30940754569047	-1.42569305443015	6.6785095235734	4.18553799265341
GTEx	GTEX-12WSA	GTEX-12WSA-1126-SM-5EGKU	SRR1336134		82721002	62.37182185	29.78487616	0	1	0	0	0	1	0	-4.02876276164629	16.852453134199	3.54100744300828	1.7670766736404	3.20910376345217	6.05458740620001	4.44928143340789	1.49452473842364	-1.7422920185413	0.242935709461306	-1.12145016293944	1.60598213513625	3.71114160549644	-3.14547481195315	1.37566784959058	0.61357557546259	0.23067658682952	1.1760392730495	1.47840327233431	0.301297878296332	-0.757963702115625	0.809312646386189	-1.05602964454459	-0.255606518060989	-0.233519476052107	0.379410188123803	0.39513030370458	1.12564363546333	0.470831357278487	-0.0556253746152923	1.92071224138703	0.789893007559048	-0.714919145365063	1.13818168806909	-2.00300018167022
GTEx	GTEX-Y114	GTEX-Y114-0326-SM-4TT99	SRR1336593		92372390	82.94844812	7.02464665	1	0	0	0	1	0	0	-18.6153625315932	-13.7554948096039	1.14615458506135	-6.48919959435562	-2.53686760386082	-3.97441004917773	-1.08706524771388	0.9612603001888	0.0270148992089355	6.13321418984929	-8.04391812489013	3.64122508106057	-3.15615072595858	0.457832334106028	1.2915439878387	4.77132223095427	-1.15755103437662	-0.139457118796732	1.31974199322335	-2.04127314211759	-1.93649919044905	-1.1689299510973	-2.07536926363781	0.311738809296438	0.709962394472009	1.75870314620947	-1.08772818301021	0.88467545067137	0.183774920938618	1.48078519011816	1.35516455129487	0.341381655244294	-0.148390968203124	-1.33019758521207	-0.380175800761569
GTEx	GTEX-ZV7C	GTEX-ZV7C-0326-SM-57WB1	SRR1337238		104503506	63.4793114	30.01163425	0	1	0	0	0	0	1	-0.997422596878596	20.9513912139555	0.560035629522316	2.32222544411185	-3.35068900522612	-8.46620760624359	-2.0401017779785	-1.82348681572951	1.51478598686602	-0.314049452985165	2.26890444365288	-1.89740350169825	-4.57296468183891	1.43828517083027	2.2409114905264	0.158204186295005	0.0431339481980871	0.677152913404145	-0.686405039676071	0.360865040974642	0.485758248213147	-0.801363684932257	0.756830769397475	0.662179788379281	-0.617690278346348	0.569660370291546	0.585263006316868	0.794080083910077	0.367575336401814	0.171087859443929	0.817399859898521	0.17768610408234	-2.60555353193219	-0.0973427818116967	0.584558116490456
GTEx	GTEX-YEC4	GTEX-YEC4-0226-SM-4W1YG	SRR1337388		175731668	57.31589937	37.439829	0	1	0	0	0	1	0	-2.241162005083	19.3069070658124	1.8394541843361	1.00369160350449	1.1527645227646	0.0398957217048861	1.70358478988474	5.57055557463845	-4.33511530822027	-0.0487613703136711	-2.36680412100165	1.62871996895861	3.13310374509817	-2.4124232780677	1.96149376574381	2.61368786010424	-0.800000503813515	-0.987736888357819	0.177523340860501	-0.0491349489205477	0.857842474027564	0.06006247208323	-0.00434269268417944	3.40382654073847	-0.693425811444546	0.172687666356056	1.14380015732908	0.442297902545656	0.0126634870237158	-0.80560353109514	-0.28000481487514	1.52830937452049	-0.130351041626948	0.0855815329554989	0.198046523135682
GTEx	GTEX-12WSD	GTEX-12WSD-1326-SM-5GCNU	SRR1337684		67758518	90.18468202	1.451295024	1	0	0	1	0	0	0	-18.4593288965966	-18.5560883481651	-14.9669860104341	15.8609105390603	2.5356875321692	1.82380376454003	1.0663390484425	4.38437147935757	5.064009864154	4.1369419154823	6.7916826006312	-4.34786767880188	0.779421813347825	-2.81051913297776	3.30796638189752	-1.23968879764311	-1.79724806202949	-1.83165804525746	3.68635637369416	-0.602448603999608	-7.15798692433037	-0.659038990687693	-0.782547192959942	1.32010643911076	0.441269687351033	2.57210145234263	1.02062914543799	-0.323035666547475	-1.37549292337414	-0.417913203727936	-0.577533045104846	0.537636555804622	-0.972285115187069	-0.400125377930779	-2.09097187082004
GTEx	GTEX-WOFL	GTEX-WOFL-1226-SM-4OOST	SRR1338171		214162330	64.48636042	29.94024393	0	1	0	0	0	1	0	-5.2386913180461	13.0184920444625	3.63784303286466	0.65273040157101	2.68471557767183	3.87754214105356	1.03465259036405	-2.61071621103158	0.228359712805716	0.954709547267301	-2.63345077829578	2.30981864551176	5.15104469198289	-3.15034919318864	-1.63592611734276	-0.162881123607172	0.281720666346423	1.02471167027936	1.52345520941829	1.69267854517272	-0.836761642987042	1.12301109356557	1.25538947321453	1.46686535903916	-1.15474585285413	-1.41068007739694	-0.683432183341078	-0.293209637786013	1.31865743213238	0.307450588199742	2.56188004007244	0.155584273255852	0.283114207784222	0.978446946792608	-1.46338927548402
GTEx	GTEX-14E1K	GTEX-14E1K-0926-SM-5S2U4	SRR1338195		103744938	82.96624169	10.09951734	1	0	0	0	1	0	0	-12.0825827527946	-4.25460395249335	17.7135710615771	-18.9964148121754	10.6634981434554	12.7118829761014	-38.1466809075514	5.27524960451401	10.9267734092458	-10.8577387801113	16.482578916488	-11.8978979392762	5.28143319149705	-6.02493364219314	0.502450586051436	9.59569424260945	-2.33989487700184	-0.457116379206128	-1.32744572233147	1.66113899877779	1.52924194605267	6.39825262210304	3.22795169150105	-3.87219383128963	1.25187079062369	-1.84845241650874	-0.684051638066531	2.98547278272281	-0.895558469776762	2.86689212142519	1.53660087612722	1.55684857006351	-0.318453238343425	2.22638378664834	-2.02661503934418
GTEx	GTEX-147F4	GTEX-147F4-1326-SM-5LU9V	SRR1338346		71272556	91.51124593	1.415964372	1	0	0	0	1	0	0	-14.6812188061159	-9.60399282844574	-4.46330695617834	6.98601283267838	3.22953521107018	5.93304455299883	-2.19062096834449	-1.89570573898276	8.59687162153506	10.8510537267055	-6.65295475145916	2.22445301805512	-3.2040172710412	-2.55431117234661	-1.72539807778962	7.79544882597037	-1.44018238905315	5.21267385144279	-0.292104175932789	-2.07782242076744	-6.15957476608469	-3.12747053889282	2.47726932450442	-0.650969848977751	-1.47668150162771	0.334244407873288	-1.76565096584401	-1.64099677544003	3.27765909923783	0.192908905181559	-0.56526782999589	0.537358618154143	0.258210929707995	0.406752472984504	0.762186786019715
GTEx	GTEX-12ZZY	GTEX-12ZZY-1126-SM-5DUWQ	SRR1338363		84078970	34.81068809	58.68469607	0	1	0	0	0	0	1	-1.90080141128862	18.8104327911217	-0.880973823036365	3.69673663121504	-1.6834314151703	-7.20547490488296	-2.41359388005105	-0.764261741461019	2.44396929084719	2.14083907288599	-2.08153095521575	3.20148984158325	7.4687080575412	-3.66885851449906	-3.40234548885469	0.463698952838637	-0.440368842737864	-1.18854670442271	-0.941258898202101	1.50676054099678	0.735771730031163	-0.268937290793063	-1.49010336980502	-0.208811270697144	0.79082665863068	-0.202483532007019	0.0569634521823701	-0.897400012825303	-0.103421947587152	-1.1244135969569	-0.181573869293933	-0.287802843293644	-0.372440264687973	1.02017100441488	0.925231217689805
GTEx	GTEX-ZYVF	GTEX-ZYVF-2126-SM-5E44N	SRR1338789		97678872	86.74776261	2.107344155	1	0	0	1	0	0	0	-18.0609704416986	-16.9995156318679	-5.19521813283487	6.64685007849646	-1.7045408897792	4.11758519730286	9.35103690439824	-9.99331500473743	4.08493106658199	9.32794073185782	2.84940882593077	-4.1703610945469	-0.294848095345085	-9.36411625508074	9.63131251327704	11.0575382010895	-3.79032193260318	3.81447208232212	0.234051526794038	-0.415179580822595	-5.43806797196003	1.81322645334505	-5.4279630930945	-1.04148429216649	4.68980893827009	3.04798495776088	-6.66935796347369	-2.19918522914678	1.25094040001791	1.55368641610421	-1.19353453556841	5.80948958362872	-6.60808973943165	-6.74575889491688	-0.165967386515969
GTEx	GTEX-13OW6	GTEX-13OW6-0926-SM-5L3GM	SRR1339199		76539568	72.46639281	19.97891862	0	1	0	0	0	1	0	-4.63350770916217	12.3966873765764	8.40043694359682	-0.0184897184195568	7.98279564123151	15.3234660707575	8.39984921332122	4.89305701262537	0.301628783010985	-2.66307060917348	2.72813266467824	-0.00196574198458464	-1.44798439062757	2.49042936760679	-4.32469542337492	-1.41438420743222	-0.614430278163449	0.490183310375108	-7.09904220588626	-0.789245353043122	-0.303295020275499	-0.936316475763631	-5.82320567112633	1.13516279506692	3.40585256266956	4.1258152086845	-2.92842199131306	-0.780966473203033	3.38334338915651	-2.20149390029517	2.51591353651428	-2.4469338839723	-1.19894384077084	1.51866485104988	1.19059467538267
GTEx	GTEX-12WSG	GTEX-12WSG-1226-SM-5EQ4C	SRR1339321		94811548	70.14427399	23.07687667	0	1	0	0	0	1	0	-1.78757702860855	18.3719086226733	3.49904481571417	1.58523533001205	3.73518756332153	8.51565669787168	6.79945094906084	5.71737504156224	-3.74923995182854	-0.831663397800473	0.0243598977638276	-0.55607141426489	-1.31849235436904	-1.04166304865579	4.7788685646051	1.97213615539658	0.0376992302593396	-0.267094110602969	0.703581145947038	0.80136271022754	-0.696236709643509	2.01718633788962	-0.612829184273825	-1.73717356532876	0.36233138329906	-0.960310766948497	0.821567733540204	0.430340589699493	-1.18465725058575	0.0167408277958314	0.412525907094486	0.615338598189733	-0.706470836445098	0.562773394215626	-1.67561293094834
GTEx	GTEX-ZAB4	GTEX-ZAB4-0526-SM-5HL7Z	SRR1339597		88130002	89.37751528	3.335994478	1	0	0	1	0	0	0	-24.8722587003267	-26.4074304989009	0.477459690224819	-10.9497808830002	-6.83126748936732	-5.72275946185455	20.789992165764	3.92067856957389	18.7554568577223	-12.9122081055827	4.19216458421073	-0.464938282086932	4.96639048673932	-6.67871853864279	16.0552226836005	-3.84537723063676	-1.18011671598554	-0.972955460471607	6.60630828842379	-0.516068537549011	-2.57743441245726	1.56676675302152	-6.00018284499607	-3.91725200080045	3.31607771436618	-0.895362090096956	-0.888881993571673	-0.052091197290795	0.790217236058049	-4.66049036625349	-0.897381328377072	-0.590941779596888	-10.3399030097755	-3.57423548445212	0.893641235738737
GTEx	GTEX-ZAB5	GTEX-ZAB5-2726-SM-5J2NH	SRR1339722		88953606	64.69413955	28.64450712	1	0	0	0	1	0	0	-2.54437863572606	17.5966152274492	0.849280706962998	2.34338127161487	-1.71382358530814	-6.16787692583978	-3.23703998974977	-0.520779854564313	3.86776770039778	2.98916472489638	1.81333631123313	-1.44343121530515	-3.38665639711771	1.38379406435068	0.416725286206649	-1.20920143275254	-0.199701198759311	0.0661928558155587	-0.939614196169217	0.632049018027207	1.51654352378304	-1.07650415220249	-1.32711740414875	-2.89353962003095	-0.215398833140799	-0.0489241301524094	0.188529385137583	-0.178436964358064	0.510369278295597	-1.23524064234267	-1.22734791819967	0.880211184913	-1.17298821382931	0.934822361435531	0.917435257329876
GTEx	GTEX-ZYFC	GTEX-ZYFC-1226-SM-5GIE4	SRR1339880		94198536	82.11290035	5.581133448	1	0	0	0	1	0	0	-11.5966772422713	-3.33340832693527	4.936124408597	1.47119942997109	8.25439664594982	11.7078820018534	-6.16121179349708	-2.89958269307606	14.9879946778942	10.8700997693767	1.41620527776333	-3.60205243542098	-2.05412341088852	2.14733235030942	-3.2285336989556	-5.4416616632071	0.3988193288204	2.68157931963973	-1.55498715456932	2.27649964011788	7.65381350954939	2.17919179172428	4.75053520498613	3.21218803177307	-2.95866558180551	-0.904690487119785	2.69334513881821	-3.50538426298633	-2.33425414702686	-2.68926766994534	-2.41446221586915	-2.73119709549463	-0.384217477095275	-1.70867078664406	3.66983299752779
GTEx	GTEX-ZDXO	GTEX-ZDXO-0726-SM-57WBT	SRR1339921		93686542	60.75020039	32.81136366	0	1	0	0	0	0	1	-1.25352364036133	21.015270381129	0.0805252233242464	3.19570372608749	-2.53569979988123	-6.73280373094157	-0.633472014959942	-1.96960278044627	3.55277839939167	1.02738255721264	1.62730646493086	-1.16857443333932	0.277450215190006	0.521239494113221	-2.64574392720807	-0.542496935444313	0.000185963699560778	-0.0630691711533583	0.296523419380885	0.403919132120819	2.10303839051749	-1.86179058534813	-1.95678399332776	-2.46654771342088	0.275395255216041	-0.880017540491241	-1.2352834984832	-0.491208300470503	1.09801259183832	0.527142218400965	-0.269496175597493	-1.16233325947875	1.08280627913719	0.305457684334549	0.946019214457664
GTEx	GTEX-QV44	GTEX-QV44-0726-SM-4R1KP	SRR1340010		86897698	82.43677986	9.54549567	1	0	0	0	1	0	0	-11.0592664206459	-0.44858158080702	-1.14291676417485	2.23969547934884	3.1976853383033	3.16930766761187	-5.0735118454206	6.22490523620364	2.42721876724935	7.87750373038743	-3.55370176321399	1.09946038445252	-2.86850799033684	0.227110938783627	2.5115282284158	0.700764422001429	-1.29157870641061	-0.351684150226364	1.30875934525611	-0.474186574780748	-1.10716721883445	-0.524222747738701	-1.44519319795734	-0.774530555607476	0.789354116118245	2.15446208877934	3.57466161042741	1.41707296298047	0.113408442043865	-2.10139823524704	-0.954850139155141	-0.836801179702526	-0.798575387306031	-0.817501374359671	-2.02419874333088
GTEx	GTEX-13PVQ	GTEX-13PVQ-1226-SM-5IJDC	SRR1340280		90934330	54.12378141	39.18751257	0	1	0	0	0	0	1	-2.87188680534801	18.3071516832763	2.03333911621574	3.32006260410322	-2.11332461781286	-2.77347252964469	0.52131054594013	-9.71801248216384	3.43257665812678	-1.79187714691758	-1.22841402490098	1.9402591405961	1.00810318669115	0.207144705064137	-4.18642087894072	-1.0698577480372	-0.124458635378748	-1.64788360721984	1.43180239184998	0.982917210724786	-2.53842592933786	1.40468898449324	0.537090818908546	-2.70342510992168	-0.605709977140758	1.35728632515069	0.411597161214576	1.15841948832219	0.548539702355364	-0.402022240559098	0.924848376052248	-1.31818556748379	1.68547514509848	1.4445180120052	0.592637117378773
GTEx	GTEX-ZF3C	GTEX-ZF3C-1226-SM-4WWCB	SRR1340441		97348808	24.49683822	70.38646431	0	1	0	0	0	0	1	-2.44997179046373	17.2464133831646	-1.12491010861033	3.68316942705811	-1.86123766757797	-6.75372795122038	-2.58157142139847	-1.96664858022067	2.04987112759365	1.66823823742974	-4.06521646149191	4.58513245184644	9.94049517054696	-4.76850300456973	-4.05364202201886	0.376382811013928	-0.870878955149373	-1.24562630651415	-0.0130493281108424	1.61158886061715	-0.725941693022365	1.54598667527926	-0.0188779748727627	1.64922464298436	0.00816250962248129	0.0902923416701786	-0.38183645161499	-1.03185989722292	0.282746977208635	-0.711747902125454	0.172176129842957	-0.171781942735505	-1.1559707878576	0.0158205506397224	-0.398328320207909
GTEx	GTEX-13CF3	GTEX-13CF3-0526-SM-5IJBV	SRR1340553		100821324	86.6509073	5.542355306	1	0	0	1	0	0	0	-19.6552304636952	-16.7238655128429	0.611860332497553	-5.08213017339407	-3.25996908241563	-2.7606942412371	4.74514618572846	-4.78851595803699	-1.26647352650551	-12.8255313362752	-7.36604875217621	5.83001471700498	-0.042057216447139	1.19785120753363	-0.631640406714156	-0.0394714404727489	1.1110987754561	5.98465607874446	1.71174188283234	-0.348556570261106	4.9221583992573	-4.60583643261899	-1.75917952914088	2.03606245886518	-0.436644696967574	-0.501876448849032	2.1206786699859	-0.606301488680198	1.43693463329701	0.81253658419519	-1.78481081883028	-2.34873586310184	2.47431659237687	-2.22952104898396	-2.17333377631918
GTEx	GTEX-12ZZX	GTEX-12ZZX-0726-SM-5EGKA	SRR1340617		83218792	71.15967269	20.47665869	0	1	0	0	0	1	0	-2.46165059516452	18.5766386512243	3.9816596963001	2.52068048207186	5.72423096731681	10.049707538155	6.55883799664868	8.07684649211796	-0.0134073270713551	1.61948711743753	1.84019948649403	-2.28567435366989	-1.68355599575753	1.36931541697693	-1.96229773044005	0.0450686868209448	0.472909628587044	-0.19715982027038	2.91518995830663	-0.421898056741308	3.75180182778198	-0.884786515722451	-2.42977945363557	-4.96970885420128	0.0285270319726126	-2.4215262752728	-1.54555988283948	-1.33027667419104	-0.643862152204951	0.121920721234203	-2.84096376952682	-2.23948058040224	2.8786626937381	0.587403531303691	0.863922186749481
GTEx	GTEX-YF7O	GTEX-YF7O-0526-SM-5P9IO	SRR1340641		106766276	68.21037759	27.32464322	0	1	0	0	0	1	0	-1.31909603376033	19.2686964725573	2.52271861140003	0.798771687387146	0.274703295391071	-0.313631558271315	2.43515656953429	4.03887690138066	-3.77901139879268	-1.68444079491831	-1.61289147336913	-0.71790193802548	-1.70623113052983	0.746710458095096	2.06949880627849	1.57510601620013	-0.570054462806895	-2.43409565923686	0.967685518793667	-0.542393887156096	-1.38449117948635	4.21055245401547	1.7018918320707	4.66317390119942	-1.18772537722201	-1.47485776157657	0.625602139616988	-1.94620848207602	0.478114546059369	-0.307266067096623	1.11690911494125	-1.69916697431937	-0.359595885956161	-2.52719167500646	-0.393689360200677
GTEx	GTEX-Y8E4	GTEX-Y8E4-0426-SM-4V6GB	SRR1341408		124423820	70.42749531	24.2163695	0	1	0	0	0	1	0	-2.83741696270009	12.6615884359879	8.59918873292454	-1.69033666010205	5.1532088612403	7.45243034774117	6.74939712704829	7.62435656896839	-2.61058446398544	-1.69786965395741	1.98826462004247	1.40590843333954	-0.488186782213942	2.06320238028608	-0.665136333982869	-4.52650469023557	-1.08614753875713	1.4243389412153	-13.0879389117527	1.05443002155213	-3.36525662800359	-2.38029474909179	-6.16772159249797	3.14765669654972	5.14806432377137	5.55852507923228	-1.854731085783	-0.740926314751922	3.58740723727379	-2.69937939588217	2.35547563418993	-1.67068335651533	-1.28825193474387	0.429281667016742	-1.23147273142327
GTEx	GTEX-X261	GTEX-X261-1426-SM-4PQZ1	SRR1341456		62362594	21.65295433	73.4085917	0	1	0	0	0	0	1	-2.84463042797388	16.5797030782447	-1.27817849400585	3.31768367411913	-1.73428716503775	-6.84261134976366	-3.80035662887196	-1.51256319548609	1.72707513507633	1.82085791103449	-4.55741166238267	5.46538792094672	10.7764942408185	-5.00193015236213	-3.34272287566416	0.589893194847525	-0.607030075565017	-0.826062374077938	-0.257007910033637	1.1966972191341	-0.745893230284165	1.87323113361613	-0.214915110874979	2.90444864083455	0.315438071827284	0.319677178454668	-0.236246263100322	-0.159398252304626	1.02070456017184	-0.61947998616507	0.208549293498291	0.881456897028582	-0.693344889818733	-0.237175271317814	-0.0265406784593354
GTEx	GTEX-133LE	GTEX-133LE-0226-SM-5PNY3	SRR1342002		111636230	90.87048174	3.746237221	1	0	0	1	0	0	0	-18.1999188970819	-17.0972395040928	-8.34424859034793	6.73267110007619	1.04257704020209	-1.19564343140955	-4.78406519137666	5.31193947397762	-6.91786197173613	-1.63869367949813	2.99373508043533	-0.638148109255421	1.40504431361151	3.01982476359757	-1.50985124434428	-9.62178646414904	3.22102799435771	-6.71042632727929	2.24889452082776	-1.41796026311605	1.00114578562375	-1.6616630067417	-0.696606759213718	0.253808848394253	-0.855844720043229	-1.48710112209981	0.171931802651265	1.34072202123344	2.0118859389802	-0.485080049018243	-1.69032912131454	0.931251407806091	-1.86311715144109	-0.306033163853281	-3.44722060737594
GTEx	GTEX-14C39	GTEX-14C39-0726-SM-5RQIK	SRR1342701		87378978	51.55218227	43.43469204	0	1	0	0	0	1	0	-4.78371088827061	13.0105357860931	1.80207867164192	2.32525182560737	0.819907648589392	-0.940651795465524	-1.01328578961268	-1.96819788463768	-0.221364289181422	0.545474862744467	-4.83672622250138	3.51240327597263	6.63334861479278	-3.72396322230421	-2.28374752411141	-0.151203003138151	-0.206962547451118	-0.443756024013015	0.078010932352533	2.17184796923615	-1.16123438574942	2.26867118119126	1.01154618889932	0.886243710684284	-0.911470858776246	-1.51156463150596	-1.64636051402716	-0.544323861482355	1.00141252389486	-0.0214239223612268	2.26962229673855	0.269518009112328	-1.83092249219822	0.121108806682859	-0.197075445984099
GTEx	GTEX-ZZPU	GTEX-ZZPU-0226-SM-5N9BV	SRR1342829		104035188	85.81539354	6.835748689	1	0	0	1	0	0	0	-28.2596467602317	-25.9167399194941	28.8333899358752	-45.8628413418502	-1.33643015389152	-3.5613087905137	-1.75623299072177	2.01526543567186	0.704955628470389	-15.8163692712437	11.2916314986852	-3.94211291719287	4.03843611735317	2.66687735547331	-10.4027170912915	-12.1026112115342	6.05650417049546	14.5203532944475	9.17841970106571	-1.54191480866525	-6.3502369217226	-6.72777869305366	-5.61009088968319	6.32095699343039	-2.69371881348147	-1.93670697156608	5.81401191145069	-1.68304429090911	1.9382931610992	-4.93037404413185	-4.5795226929722	1.95816023158734	-4.76304334139544	-5.99661689382174	0.730741247560867
GTEx	GTEX-ZVT2	GTEX-ZVT2-1026-SM-5GU55	SRR1342916		97087764	63.1119077	32.28622919	0	1	0	0	0	0	1	-1.57731151971049	20.7030183077533	1.05828199199545	1.50513971897759	-3.35416314993261	-8.80174283206151	-0.860999794706079	-1.33662458219935	1.2279057164571	-0.201794288612052	2.52168651424239	-1.97859447182607	-4.36782205297192	1.58781164577763	1.52430122561073	0.247775836579057	0.605108714637424	0.246070497527687	-0.610031554394383	0.909331351988355	0.352024095981458	-0.351203254034741	-0.793966800902425	-0.0221901770770295	-0.341655800253903	-0.214106203487167	-0.233254942675427	-0.521787226309731	0.382187950124808	-0.691871422763713	-0.102140267794784	0.198901776928264	-2.14251091156087	1.9619655186225	-0.147826212343513
GTEx	GTEX-ZF2S	GTEX-ZF2S-0826-SM-4WWBI	SRR1343653		84061594	68.66547879	25.96301707	0	1	0	0	0	1	0	-1.65542291434162	16.2659388382321	4.12741373937511	-0.323227746321754	3.59442164545924	4.05480412428684	4.77426863158462	8.2590322827084	-4.15841545861927	1.15678064104363	0.816784760120736	-0.0277373555290522	0.270244865292146	-0.436671118159651	0.0342046523527147	-0.357339568276903	-0.391687668687968	0.0879187200573347	-3.74187755851782	1.01570975214403	-0.341336888242018	-1.1809160400275	-1.40829575132274	0.885220025127829	0.662415710435429	1.04683427827526	0.549258788708967	-1.12472212442131	-0.12341271503948	-1.33441506612865	0.0997313439560367	0.391146604864474	-1.38335654402518	0.343535172182986	-1.05485071520605
GTEx	GTEX-12ZZY	GTEX-12ZZY-1226-SM-5GCNK	SRR1343795		93008748	64.87495778	26.2104055	0	1	0	0	0	1	0	-2.29862626927986	13.6709820237196	3.73809861628419	1.76154218664244	3.90761788391795	4.00775120570618	4.13417097998154	2.66436953174743	0.0882992365903515	0.911811890141808	-0.120144249560131	1.19360642854077	1.73045567278851	-0.238811774126121	-2.96943544135709	-2.06541254141541	-0.948585825681638	0.199982193986459	-5.98845848978171	1.54544611859547	-2.67745173362607	0.392403402320253	-2.73398170281939	0.145916042821581	3.23047194564171	0.764247512760272	-2.29082653729539	-2.53052654895464	0.604119877242695	-0.763251444451206	1.79377322150893	-1.69792492943983	-0.303760487900485	0.0486737148083737	1.67708612118009
GTEx	GTEX-14C38	GTEX-14C38-1426-SM-5RQHZ	SRR1343859		86448784	54.6494396	39.88608099	0	1	0	0	0	0	1	-3.81884249890854	17.0666948545878	1.77115469119293	1.45284729319622	-1.94398057198682	-4.0671591583867	-1.70842366858183	-6.92124950411404	-0.0331487423867844	-1.60907600876712	-3.38685661494521	4.02692880205819	2.97811690767512	-1.24915765437231	-0.68648806334115	-1.07394123510895	-0.0381536181601627	-1.16448943500531	0.832260269866165	0.556391600836301	-3.10622462317066	2.03438382221098	2.4628884900533	2.3754861852457	-1.59726539165459	1.62281109627447	1.79726234841097	1.80389257041738	1.58544268908731	-0.00779187999803739	0.707229459814391	2.05794570189377	2.74735287065359	0.448677183661571	-1.47592531302843
GTEx	GTEX-ZE7O	GTEX-ZE7O-0626-SM-57WCD	SRR1344271		78495568	68.85515626	19.51870964	0	1	0	0	0	1	0	-3.4052236596743	16.9885089517569	4.5369553577816	2.09921228515551	5.9609248903889	9.66911224383636	6.26779230304748	6.04054988853091	0.97180346242645	3.46761275391294	1.08269171514296	-0.411638707028291	2.36587851843719	-1.37395202007563	-2.19506518544663	-0.111533205350503	0.758898909017056	1.87353486795912	1.69134105674167	0.207062949929304	3.46295616092165	0.170064150351296	-1.41917976881673	-4.69439452136803	0.892424932618622	-1.25228231860766	0.118684951198125	0.138849619445438	-1.59186982278884	0.272848630977897	-3.00645678580539	1.08011973904892	2.55831127247753	-0.154278484215898	1.30497046427091
GTEx	GTEX-PWCY	GTEX-PWCY-0526-SM-5P9HG	SRR1345221		168467910	69.69579785	26.00121412	0	1	0	0	0	0	1	-0.331709523305041	20.1427990371733	0.271966647777614	2.07508761114349	-3.98881049795674	-8.25368921940166	-2.36721617327483	-2.99783709394145	0.71253331067545	-1.15546869608362	0.841444134634033	-2.68829230776965	-5.38020879037821	3.34347487924534	2.43431527079416	-0.196124056860144	0.162022511264003	-0.957615516703802	-0.0702154143978606	-0.0399839692532692	-2.39827358353429	4.79245697663298	1.36997039101836	3.43826357509378	-0.700900984444681	-1.04605695345439	-1.01974337393047	-2.55938822015935	0.836971119052587	-1.51599018007927	-0.455894350418196	-0.481859915939542	-0.827631087272954	-0.664572008668385	0.107562176889802
GTEx	GTEX-11DXZ	GTEX-11DXZ-0426-SM-5987Y	SRR1345390		103351692	85.95282794	4.285245761	1	0	0	1	0	0	0	-18.2249268363946	-16.4324323008071	-10.1677972703347	9.52062851952439	-1.24580862579469	-3.88835945409713	1.02695525911367	6.03043025988475	0.448894430568672	0.382142733506344	0.353877949285638	-0.164936737977349	-1.2889288443524	0.042091592643822	-3.80087642278415	2.20122761325286	-0.0789287258334574	0.972511227892528	-2.89534289749138	2.51937143574567	-1.64923506460837	1.0619630920112	2.48468793611228	-2.25987636532347	-0.947356764721729	-1.33476343661111	2.72910818682468	1.76021183466673	-0.125695503408055	0.48668235040387	2.02979455296789	-2.54355567569191	-3.29799053334921	-2.53590878123305	-0.239836228174941
GTEx	GTEX-13D11	GTEX-13D11-1526-SM-5J2NA	SRR1345436		110361386	69.0153257	21.17573804	0	1	0	0	0	1	0	-4.21471741328997	16.2352874065336	7.01161283686225	-3.62401879305813	4.92998972336849	8.83425417531378	1.67821273073679	10.0613366868807	-8.98702776886688	-3.23677430707577	1.22289373059144	-2.5002954647559	-0.855244533663134	-0.18804397193051	4.02632468318086	3.84834478694653	0.107812865507265	-1.95808734802707	1.15041487453929	-0.43196801232514	-1.06837351149727	1.4005642429591	0.558108150815547	1.87651386232153	-2.98857934706427	-1.85247188985728	0.436768645335703	-1.30208179108873	0.589458405687902	0.478852173772916	-1.5641857594291	0.379411643998776	1.5667475132357	-1.65786509711357	-1.93599873086395
GTEx	GTEX-147F4	GTEX-147F4-1026-SM-5Q5F9	SRR1345454		90694620	88.11975617	3.363257931	1	0	0	1	0	0	0	-18.3452225388198	-17.6747807569841	-12.9719594796408	15.3075411202374	1.65457416882259	4.42743819394165	2.50225352692528	-0.30010877791116	5.16562250099795	2.32570769556641	4.13706177867896	-1.88285283665531	0.588943864629904	-1.46249781760509	-1.37568510215095	4.32598884373413	0.141254504028974	5.02071946695234	1.40681836707143	-1.68009718765762	-2.2193263988012	-4.84046152874806	8.3811076854494	3.361994816322	-4.37278281950344	10.6139824129168	-10.3014980578335	-7.34682884294698	-9.76695428195755	-1.03137254799676	1.21937439724663	-4.86795164897181	2.34715286365654	3.28131193492474	-5.55087036864684
GTEx	GTEX-13NYB	GTEX-13NYB-0426-SM-5IJDD	SRR1345715		71819212	88.82945137	1.481804061	1	0	0	1	0	0	0	-18.1126629250526	-19.9045607071953	-16.7257999437999	19.7074144534452	1.17100678146681	3.72405191525126	3.0775403778614	2.42371414451902	5.22511472757414	-0.237488539910796	5.78350624582134	-4.09885290836554	-1.06907748587298	-2.10025251649781	-1.46194942944694	6.05404285082373	-0.300162090118662	8.21455218585295	-2.11235466335577	2.87191100454669	-0.953104895119094	0.773512683308972	4.72541057481835	2.82287317271577	-3.78729084744814	-0.459897685172257	5.7942732108203	0.576327482202532	-2.3164540156248	-3.01978764124158	0.765775100842668	-7.88381907796313	-0.229761776435548	1.46688228494226	2.97512623832302
GTEx	GTEX-OXRL	GTEX-OXRL-0326-SM-4MVNY	SRR1345736		88571952	65.89842798	28.09950039	0	1	0	0	0	0	1	-1.02944707212643	22.3200899037821	0.552018790768159	2.93658694492823	-3.18631769113898	-8.73797355738427	-1.70648638753088	-1.69383210694881	2.17137955427407	0.278334029461792	2.62824329362506	-1.93391330064143	-2.94094518586991	1.251180093046	1.25635197044948	0.290268776981653	-0.0325952119252869	0.3599041188352	-0.61104265215988	0.306801154975064	1.42903638603023	-1.45718999892862	-1.52251661984053	-0.873945093760681	-0.901348050773348	0.867956585746899	-0.887900165286066	-0.667554119583637	0.242286311072874	-1.22396578644074	-0.388044646012877	0.637076245866999	0.364232249746574	2.53777386123908	0.390801077280988
GTEx	GTEX-11NUK	GTEX-11NUK-0926-SM-5HL57	SRR1345827		89309180	67.47371995	20.788237	0	1	0	0	0	1	0	-4.10759502550004	15.5596264824144	3.98729836198556	2.64112594765392	6.68485037128771	10.569071381366	6.00189773024422	8.21145698130809	0.644010835177665	3.34552980167059	1.58579310681057	-1.57404653501479	2.41392616187989	-0.115290730692635	-3.43479997937356	0.554935568181993	0.909341706288736	0.00123969370284307	2.71279856080853	-1.28119750574037	4.13636100041038	-0.654816938089414	0.0247602859794687	-1.55589305593488	-1.24914972964068	-0.70454572880297	-2.88449047157943	-2.83880130456088	-0.942479097571717	-0.0403886175789465	-1.02923901414055	-4.06626614268432	0.747289310197671	-2.45871689960689	0.309234769553246
GTEx	GTEX-YF7O	GTEX-YF7O-0226-SM-5IFJ4	SRR1347042		91758352	84.52804819	8.910741989	1	0	0	0	1	0	0	-20.2604977542309	-13.1299290273005	14.8248112659036	-24.5848912455579	2.09042787737392	-0.552779331735997	-17.6857429499838	7.45128263835928	11.1325015368356	-7.19055768959915	3.64841943424539	-2.47241682175809	2.02096055013423	-2.63932650408668	4.02423777382423	5.3184620556625	-0.208889059161245	0.507077447067021	3.71190624503397	-2.18674364891532	-1.64968053356633	2.63279673319168	-1.17443158676398	0.304082326935277	0.403457984718824	-0.386992785448384	1.36041283179581	1.03011884103494	-0.150713067687181	1.47456378101673	2.0067147612941	-0.0876063673081434	3.90782703339737	1.29183775291775	0.223362580551069
GTEx	GTEX-13FH7	GTEX-13FH7-0926-SM-5J2MR	SRR1347500		104506100	66.44087379	27.77494519	0	1	0	0	0	0	1	-0.926393453036877	21.0481738316047	1.20008975767854	2.238108054815	-3.59343402557992	-7.58263584483455	-2.1038217307703	-3.48790181717931	0.612570773815775	-2.18364518383821	1.2659629721124	-1.6674444544608	-5.721041117797	2.93361968189681	3.42116643887832	-0.761166028787446	-0.176151648244857	-0.0218378187847504	-0.333982347585557	-0.4772477480129	-1.50407481356607	1.76492491124072	1.73477910053045	3.4052336993359	-1.25501634163148	0.578714689194209	0.905616579989801	0.00193747640670525	0.811701247413759	-0.215585630545045	-0.276635818681493	1.42349547534571	-0.160966679813771	-1.26337557671056	-1.19390365900243
GTEx	GTEX-11ZUS	GTEX-11ZUS-0226-SM-5FQT8	SRR1348226		81571842	66.2829264	25.32935078	0	1	0	0	0	0	1	-1.27554455912689	21.562903070305	0.545383329289536	2.35791004048943	-2.3303662301497	-6.82722820290855	0.31123561477664	0.185532022047778	3.69077186122756	0.562377901825123	2.24403600897171	-1.45001340850131	-1.36609569585724	0.461110976396672	-0.502161735285116	-0.328899082393188	0.183923255676215	-0.0033288609822413	-0.918893994778614	0.56131875133552	2.77978422998187	-3.33341695696676	-1.72236949563325	-2.72410039174971	0.505904234181304	-0.66357264625466	0.678418553840171	0.0036397670075604	-0.64646381156986	0.118855363247622	-0.284020791463335	-0.605995978834707	0.714979178686196	-0.103883153398142	0.970026535913217
GTEx	GTEX-11UD2	GTEX-11UD2-1126-SM-5EQM6	SRR1349099		94675588	89.31950441	2.134307315	1	0	0	0	1	0	0	-16.7662026711861	-13.4384144227975	-2.25699132399312	7.0422395359809	4.35991186253856	12.3801030621294	-0.995151903876357	-12.4159011740586	6.71783399642793	0.204477529159416	-12.1087282698013	3.70641376303841	-6.94730614168407	1.02431043893503	-1.4108236138069	9.9668412597492	-2.85484375698895	-0.737077655791181	-3.56571244806736	0.0242785074644362	3.94505525648328	-6.5333933682885	1.23464961066201	3.37770429481215	-5.68456879995224	-0.274113903507608	2.00656726519338	1.22082360232181	-0.769150492262416	-3.15441507950761	-0.153459727825444	-1.33088544064718	-1.12707160595733	2.50383011780108	4.33090053931884
GTEx	GTEX-ZF3C	GTEX-ZF3C-1126-SM-57WEG	SRR1349433		99586346	64.09625472	26.68265186	0	1	0	0	0	1	0	-3.00110794978915	19.7247801285045	3.34568064591819	2.32670487792275	3.71630754433984	6.93902387297367	5.44432046385384	4.07909998677259	-0.692088492494603	0.791892999324831	-0.748168539889423	0.240362473650472	1.25781614445459	-0.933944358184647	1.2977804690783	0.378944527000786	0.665072445473239	-0.138071086204724	2.16280615765169	-0.345074558945163	0.404400042562294	2.15916156000583	0.276223769618515	-2.9645144802479	0.544887146788476	-0.492677840228327	-0.497887610211015	-0.264357911974912	-1.72290069011889	1.53056704850607	-0.70413417600844	-1.79733486703845	2.75440463893273	1.10468029460203	-0.463538133968694
GTEx	GTEX-132QS	GTEX-132QS-0426-SM-5KLZ6	SRR1349772		111655684	66.28935971	29.01767007	0	1	0	0	0	0	1	-0.966736608050306	21.1259931920436	0.71906930079823	2.20382502916437	-3.73430444822243	-8.63508273900768	-2.22612996526338	-3.51076559398471	1.70322691572968	-0.781839580222673	2.23573972227714	-2.12036361141885	-5.47243991484293	2.48057506723387	1.89077667878355	-0.390267578853917	-0.0298260684553907	0.262520885416702	-0.204210667717008	0.179209051412156	-0.938109545715969	0.803733432985268	0.0976365092850764	1.04065897909596	-1.12687377403052	-0.0815717024084323	-0.500370316680367	0.105555576680035	1.61900506133408	-0.80486471734086	-0.140992466967604	1.21454211307833	-0.883386786592747	1.13190752534754	-1.08837038659697
GTEx	GTEX-13QBU	GTEX-13QBU-0426-SM-5J2O4	SRR1349893		98709628	67.14127623	27.07512382	0	1	0	0	0	0	1	-1.30247115274727	21.1010736747896	0.976357700572802	1.2728539452264	-3.06337226225789	-7.37310412621436	-2.35084669343454	-2.62603973742138	0.55797937112905	-1.20495895346282	2.34095262534329	-1.71678577150141	-4.289149117964	1.41709478151285	2.27478289709539	0.0424405033770138	0.255058921523251	1.73693616245698	0.424696165575953	-0.50914242900042	0.103228157981257	-1.97238644154069	-0.369396609346744	1.40621773831968	-0.664541792095169	0.441824237498453	1.23662142887496	1.14937709634609	0.483357786721561	-0.779419417347935	-1.05821497739438	3.33835172481996	0.10246776405802	1.12474399417128	-1.9814058098588
GTEx	GTEX-ZVZP	GTEX-ZVZP-0226-SM-5NQ73	SRR1349956		92380864	57.65544258	38.29604365	0	1	0	0	0	0	1	-1.51315766855002	21.7066982074318	0.481096781715559	1.87985085339519	-3.04060952256554	-8.19901493934014	-1.44650259708461	-1.13167518975561	0.184890231453996	-0.433652152581211	1.81115791338359	-1.09672580558472	-2.08651729629642	0.215471758292439	1.77404515477587	0.211767084737799	-0.213492925658119	0.717660082364099	-0.588656540622088	0.134727462790742	0.644705955469391	-1.9167613416751	-0.913178439134333	1.2898260336474	-0.123723828281218	0.12297464341901	0.464781852271951	0.77229847840335	0.236517640178721	-1.79456580179209	-1.43278629502823	2.83584491852037	-0.327855468691476	1.62443339312776	-0.327065773359666
GTEx	GTEX-12WSD	GTEX-12WSD-1026-SM-5EQ42	SRR1350609		92728632	90.11227945	2.114602532	1	0	0	0	1	0	0	-17.5970722527829	-17.5935365513493	-7.97797841774774	7.0751111226545	0.233350795101181	1.30966577860973	-0.0638189975637458	1.42762018136931	5.60216272846553	15.481299313707	-7.63327683059154	-0.967630305549884	-8.879439054173	-1.64176252210294	1.89738147970912	9.78412690250363	-3.84430140350731	0.112183601851145	-0.766076607541694	-0.7114487211929	-8.70365415855678	-2.9464228021193	-5.05470096542815	-1.32893868557118	2.04867136755499	0.87431568911857	2.9336587071126	-0.744377648548609	-2.37200079726309	0.476605123997378	1.67752954110318	-1.44478231331417	0.0287591896212229	1.82479253619173	-5.41151476763931
GTEx	GTEX-131XW	GTEX-131XW-2226-SM-5PNY1	SRR1351104		108523188	87.77972133	1.273884435	1	0	0	1	0	0	0	-20.2232912914483	-17.5821943622379	-10.5564576973044	11.4626773227341	2.20834571361808	2.70487297215206	1.95565465174238	0.514766659058049	4.28851175372973	6.21808149527729	6.17069465141986	-4.09000029291084	2.76282748339872	1.01660211336665	-0.921276215718273	-3.70082528947925	1.46027961732461	-3.50645430719633	3.80237422516145	-2.88710688115186	-1.51368221152616	1.03887646291412	-0.133747111478016	6.38630140228899	-0.795849905606533	-2.69393881126638	-1.41409904161318	-0.707188510825269	0.50831537623299	5.97903288017919	1.45819051297437	5.55932524555273	6.50026793447332	-0.315527641374727	3.10809871324434
GTEx	GTEX-13CF3	GTEX-13CF3-0626-SM-5J1NO	SRR1351147		109635778	88.07910498	5.581066794	1	0	0	0	1	0	0	-14.0130500385893	-7.90375760569566	-5.38820853503901	4.41680655073992	-0.39899492038308	-1.39308876198305	-7.90489759012894	-0.512907375407683	-2.15539773805832	-0.235682717162484	-9.32705609683826	4.57694526395396	-2.10991346451474	-1.12483037307238	2.31764136889667	7.24557289153748	-1.83639793546884	0.399747896986708	0.784127729610339	-0.840664227023832	-0.442478224767778	-2.67556246490575	-2.89788786036305	-0.604200970852612	0.429437096514588	1.12999229009731	-0.8805995534427	0.83656829034564	2.93843177205165	-0.807091508631912	-1.10740929219203	-3.0897904456616	3.55566160564757	-0.545992228649701	-0.143997328732319
GTEx	GTEX-13W3W	GTEX-13W3W-0626-SM-5LU45	SRR1351521		83363744	86.32594045	6.422835328	1	0	0	0	1	0	0	-15.8930031061137	-9.26606223423759	16.93340722027	-18.9439685863268	8.61167881482523	11.0024429643952	-30.0345761744439	-2.34678051834076	-5.80144444352977	-10.8426802104602	8.02756344587506	-4.79817536789113	1.7548127965365	-2.24188578527258	0.301858846725666	1.54346488468753	-0.875663297476873	-3.31077666293206	-3.35751249324044	2.931620209305	-3.88897754722596	-3.23168661317485	0.57875691293279	-1.14600324941684	-1.34617766655866	-2.83512957952759	-4.77303382956443	-1.48535579490723	0.107869518312749	0.912944603070465	-2.18938858600445	0.791576282848411	-2.00482174097695	-1.43575856281607	1.48952621167453
GTEx	GTEX-117YW	GTEX-117YW-0426-SM-5GZZZ	SRR1351583		108725516	24.28176657	68.73826012	0	1	0	0	0	1	0	-2.55648136330057	17.0019747131428	-1.53173574018673	3.62626443711465	-1.12780159163773	-5.13573050217858	-1.52811767697483	0.358731042891616	1.1653260488142	2.19648712263245	-4.2496523638391	4.72889739742033	10.3522315229973	-4.96248571276032	-4.24549835004901	1.10295244868201	-1.06711631663295	-1.80821455757358	-0.00444538042771735	1.09303904251403	-0.493439503226372	1.20320461372988	-0.337421715427113	1.73038854016855	0.539992741008522	0.392555482216109	-0.551437796675834	-1.52434718595573	-0.220699122574265	-1.03411036306743	-0.584347818421043	-0.396653148225806	-0.431081640969064	-0.421601285378419	0.0134662235974229
GTEx	GTEX-ZUA1	GTEX-ZUA1-0826-SM-4YCDL	SRR1351931		119448492	24.49898154	67.94058313	0	1	0	0	0	0	1	-2.1510004257086	16.331026116594	-1.17655985154815	3.79935322028219	-1.77496864798489	-7.477192287441	-3.02155329126475	-1.48110933972811	2.16743885175185	2.39135691154422	-4.59926870503845	4.78228511912449	10.6378346422551	-5.38355935804977	-4.62726466177257	0.679197039827289	-0.803768396329868	-1.57351137223831	-0.603172933277928	2.08598341039891	-0.626546587045291	1.65453063332003	0.467907543418446	1.81327959995044	0.666271713313571	-0.365007261661283	-0.498401544090256	-1.20355753089693	-0.0910759510164232	-0.861674927290345	0.703102285463245	-0.55093785385694	-1.64916381731396	-0.678914577876042	0.587496390947317
GTEx	GTEX-13OVG	GTEX-13OVG-0526-SM-5K7YD	SRR1352111		97430886	61.60404412	31.18977898	0	1	0	0	0	0	1	-1.55834237915065	20.3371259872015	0.51076762416699	1.76006242191678	-2.43677171348071	-7.32591609609494	-2.83528802218937	-1.23217287998841	1.74186818255691	0.200981715872946	1.01154222417444	-0.554193891064626	-1.80007332660544	0.42888018046604	1.25821144811435	0.688394925218657	0.223324937119805	0.687400418766278	-0.0503135287338603	-0.0192285096681544	1.14260368683682	-1.60074158318004	-0.110062824546847	1.62187029021047	-1.05237796674672	0.320875601890962	-0.474253642500692	1.42889740289476	1.3897732803629	-0.179648865075525	1.14208274837699	1.39008589916333	-1.29399352277576	0.403083227407507	-0.0046802786343606
GTEx	GTEX-ZYFG	GTEX-ZYFG-0526-SM-5GZXX	SRR1352234		89681862	58.70820345	35.0178501	0	1	0	0	0	1	0	-2.337477705351	19.3789505456797	2.50675544786462	0.530165742102702	1.8268110659275	1.33800606015634	3.17377312469921	7.49920321801001	-5.75936213691122	-0.152731971190817	-0.994251443867716	0.709173788670623	1.43287184955628	-1.58644223589885	1.90291652188831	2.38902348719462	-0.705455841008734	-0.538571532829578	0.29218537759136	-0.379073284219689	0.731934091025814	-1.2161425992021	0.0883762178399104	3.06431866654213	-0.209414827799026	0.00736936457359689	1.89427993778092	0.205756814995498	-1.03227468050478	-0.311629810783796	0.0728364304634275	0.887052436496886	-1.25446080406453	-0.490542361193677	-0.763754834518321
GTEx	GTEX-14E7W	GTEX-14E7W-1226-SM-5RQIU	SRR1352619		83445230	24.4150133	71.33549275	0	1	0	0	0	0	1	-2.09640444606528	17.1606025164168	-1.21706703743113	3.69094698918055	-1.92135751856363	-7.52406978470155	-3.07651246498518	-1.22168037438419	2.01239841713665	2.21822483596003	-4.2291873699533	4.78193145505016	10.3031562366615	-4.78030833620024	-4.28347278547233	0.736357725246345	-0.68061505209613	-1.85128861696453	-0.962584251187776	1.77544077987378	-0.363785765550769	1.79959040834233	-0.0706035667658324	1.64854082425834	0.348716175869502	-0.542330219229754	-0.162801668208236	-0.927463019032146	0.0467953799500959	-1.4955600990719	-0.0589107760598656	-0.322545617783859	-1.43114441141305	-0.105819257536713	0.38413427980427
GTEx	GTEX-PVOW	GTEX-PVOW-0426-SM-5MR5R	SRR1352936		127325968	47.08345591	45.94876671	0	1	0	0	0	0	1	-2.3145089955214	18.1466292419088	0.311228175608254	3.27712368684254	-1.13620518405396	-6.2103391955907	-2.02316035272488	-1.48389252217801	3.28949903349784	2.84918339607144	-0.771896867132973	1.5461181856583	5.92408716252296	-2.75430293878484	-3.85241524229686	-0.635704301143045	-0.109290075480603	-0.613668849583099	-0.373197631278626	1.83358586674211	0.461911902636055	0.204997478110144	-1.62670158207765	-1.51224923782624	0.229274833562044	-1.3122677025034	-0.788418179385648	-1.24942169140842	0.375250586605256	-0.827418796378282	-0.632343951286018	-0.824746785602786	0.230083652630949	0.596776335054897	1.70323985663222
GTEx	GTEX-WHWD	GTEX-WHWD-0526-SM-4OORW	SRR1353028		62630640	90.09779239	4.348421156	1	0	0	1	0	0	0	-18.6462194912219	-19.3491362427311	-9.36510346902701	9.54715735274606	-0.084655186900584	-1.32001460528247	0.148629215475097	-0.141857362864827	-2.33988477416167	-0.224177387590625	-0.918265156070859	0.655304184039216	-1.08947158179525	-1.78341600282051	4.47081871049823	3.32371546673404	-1.3854407457903	0.538053010877123	-2.58976192039694	2.73270183306863	-2.52151424646862	-0.667132375573901	0.446861258274858	-3.68387688823335	2.08326858791681	0.618184943353151	-2.30897946926708	0.544097050950431	1.25341984206643	-1.73716168463589	-3.14338781092141	1.88181520655239	0.534237157144908	-3.95730811499716	1.51826605267742
GTEx	GTEX-Y114	GTEX-Y114-0226-SM-4TT8W	SRR1353970		149801484	60.29642804	32.19454755	0	1	0	0	0	0	1	-1.13004016802007	21.623511125083	-0.0412985361325888	2.54182301279991	-3.45424861025825	-9.13920176156121	-1.88043215170912	-2.3311148094587	2.16055055593605	-0.158941895433331	1.57047160474862	-0.731831759432516	-2.21326329052937	1.17913408066456	1.34897029598753	0.452936373658004	0.523189892060651	0.237432971804671	-0.376782051184452	-0.487940100445164	0.636349964930349	-1.29624493603569	-0.0882913769171625	1.00189595384714	-0.168257777844226	0.842774830617275	-0.37481527673265	0.711016678964179	0.427587000321981	-1.36637409647417	-0.947646565251966	1.42072623800369	-0.950696038169464	1.44063993249828	-1.23897501306219
GTEx	GTEX-13PVR	GTEX-13PVR-1126-SM-5S2NX	SRR1354071		73695794	75.61921376	4.622062963	1	0	0	0	1	0	0	-14.895089560807	-13.4274825982185	-3.0416175671208	-4.95264479004874	-3.22121852499562	-5.39804228955947	0.266458866428475	2.78398148021197	2.19774198781874	8.25540442800804	-9.27549890288911	4.96779372704711	5.10928922311667	11.2418753734548	3.33732709198582	12.267782506138	21.7589267341182	1.87685060592132	-3.21196548646078	-9.21645285555121	-5.70723224907038	-1.70360030316842	3.18013810649353	-0.51189253219761	10.959340925941	-5.02640948617213	-1.46386822746141	4.98348762102322	-0.929989481780161	-5.31726094586987	-4.31024426189085	-0.815100965632768	1.58352087879516	-0.421175238479722	2.067496948081
GTEx	GTEX-11GS4	GTEX-11GS4-0326-SM-5N9F7	SRR1354363		102734158	86.46336888	3.318588546	1	0	0	1	0	0	0	-20.4298843973089	-17.9569204290587	-8.32736119733452	9.06182495800426	0.198367044919969	6.03993955201396	9.5835907206605	-6.20036216513071	10.3807430088188	1.2906397919281	3.1819784055241	-2.04660674992435	0.614114953673587	-1.29975605896601	-6.12960872280273	6.32836812712918	-0.983888680681605	7.32728253969335	0.0317492976593007	-0.145658159054357	-0.267948431166578	-3.45805949838413	3.1713030092311	8.17426130741506	-4.33831895164508	-0.590133500179077	2.00657162336099	-0.122589103242201	-0.672909103411391	4.37025033879245	1.70159354100613	1.89756322601605	5.55049173045594	3.98106705570491	3.1974330647675
GTEx	GTEX-14C38	GTEX-14C38-1226-SM-5S2UK	SRR1354553		91325718	88.88904219	2.019466192	1	0	0	0	1	0	0	-15.1319638515239	-7.22381729984806	0.63622428798094	0.126245416392654	0.995216246507358	5.06351107317381	-2.74624386941544	-13.395524307031	-1.01773477196768	1.09783264275763	-11.9238022526007	6.58966069830741	-0.0853077266695111	-1.25505679525265	7.96360641311528	3.08022872293179	-0.428553785653708	1.90331482392373	-1.735381488413	-0.179478276897447	3.24654024491308	-3.82938796753595	0.826719196903476	2.57067551456916	-0.886014701329498	-1.97883912343207	-2.71261291858817	0.852713753798096	2.86820499118508	3.85670520197648	-2.03037936493607	3.3204837154458	6.74346944326537	-3.03502221379553	0.765333480987958
GTEx	GTEX-13D11	GTEX-13D11-1726-SM-5IFGQ	SRR1354599		100926634	61.19506373	34.38592235	0	1	0	0	0	0	1	-0.951035564492996	21.0518545261533	0.781635033692623	1.6847783956328	-3.74435005460717	-8.43971544131285	-2.10552915527241	-0.920317783722659	0.594895995627142	-0.399365256343391	2.35976493211787	-1.36781478968239	-3.08970387379913	0.696724935160795	2.37053188855718	-0.350030104065253	-0.417284154777766	0.905095531885561	-1.10431393820652	-0.287664695042603	0.463541855769168	-2.81016033411711	0.405512284353545	1.0572721880236	-0.522788657523688	1.19050768468041	0.725722244020379	-0.188321874627123	-0.721551421024436	-1.75271668073079	-1.67381982303879	2.78322700955371	-0.633200184302644	2.01574800747254	-1.77374875608919
GTEx	GTEX-ZP4G	GTEX-ZP4G-0526-SM-4YCED	SRR1354620		100708400	86.9211605	4.033552315	1	0	0	1	0	0	0	-24.3616992164854	-23.4581129066295	5.13633679949779	-11.4574798369561	-4.46042582208279	-4.16875291489286	4.14977808598588	-5.48048862148007	-19.1533217050152	8.2096628612018	5.50712056864282	-1.03159733220491	0.524439198786013	2.22038928649678	-7.83814452931161	-1.15348174035399	0.0358678485751483	-6.14417735945424	3.44306416105819	-5.77542662425919	2.76748602875355	-6.05450103678054	6.29207686446423	-1.19659913129907	-1.70550903016224	19.2922304265676	-17.8066022531606	-9.61061995505346	-8.98145760863369	1.82324157922491	-3.04444956155843	1.85590367927429	2.32592232677833	-2.61908288244886	-8.08383864794581
GTEx	GTEX-YEC3	GTEX-YEC3-0726-SM-4YCD1	SRR1354710		129724504	58.24624621	35.00322653	0	1	0	0	0	0	1	-1.39323134210387	21.4509863111757	0.228936543120143	1.92229501225696	-3.21396111624079	-7.99398285344067	-1.73108396376891	-1.27214084916297	1.25428588313227	-0.58983326616173	1.87165422979902	-1.21625326184901	-1.88265189325726	0.40694353027758	1.07786086051074	0.858094255087239	-0.335100892857744	0.0991426197569325	-0.666358584527918	-0.0821910541834105	1.47289187088299	-2.67087380344183	-0.422346498871528	0.819626470922397	-0.13552819464704	0.636423937964579	0.356357399363012	0.840378251751253	-0.287616509887356	-0.454711451932756	0.254256998274064	0.945611111470369	-0.826952227632986	0.182141402189367	0.0758665870980088
GTEx	GTEX-12ZZW	GTEX-12ZZW-1026-SM-5GCMM	SRR1355194		82195620	52.29883782	40.06171862	0	1	0	0	0	0	1	-5.59668210792634	11.8230193852798	1.12273518782452	1.52653335420366	1.10336517070448	-2.46763673717662	-4.72954353038344	-3.04802344163502	2.33184923293529	2.65588980486994	-3.50830112490009	5.38124863618833	9.47186109282867	-4.50469997671262	-3.56299118254307	-2.50352921414715	0.543762512644436	3.76031449573532	1.72349274573613	1.99896665283863	-0.616478855851124	2.18563505214802	0.761995821832911	2.21609486596734	-0.401710072773468	-0.465251826422761	-1.22933766338207	0.68634806554285	1.61721817796845	1.25774177428086	0.48866470360556	1.89671635677311	-0.374627547475559	-0.172906222770216	-0.62636969373232
GTEx	GTEX-12BJ1	GTEX-12BJ1-0126-SM-5LU9P	SRR1355415		70467926	85.75826398	7.115767818	1	0	0	1	0	0	0	-24.9305649651079	-23.6373967091317	12.7636829186392	-23.9031556870283	-7.94721733538248	-5.92172535870492	9.38488513559046	-24.257094325166	-36.931847145743	9.04551914859519	8.33153889372155	-0.74176400692546	4.29833087948409	-3.32578289853366	-3.94538727623619	-2.94901739468504	0.263305676494097	23.2218274624347	12.5572397580045	-4.51840307611637	-5.99899740022991	-6.24731540830108	-11.5598557549157	5.01819941156228	7.12250004420807	1.06656257442444	14.412794492661	-10.7074466593351	-4.65652202632357	-0.763572555218227	-6.68333533085806	-4.56938674049592	0.525138875354495	-0.792354598745543	-0.650228689888392
GTEx	GTEX-OXRL	GTEX-OXRL-0326-SM-447BG	SRR1355660		71042904	66.6901933	28.75672988	0	1	0	0	0	0	1	-1.01834743849184	22.5485972979658	0.659136414120914	2.91783606524778	-3.22838845792948	-8.63015245710911	-1.49285045768558	-1.79525664861357	2.19994092084489	0.193834409723504	2.92754049410936	-2.01566502068997	-3.19138932841917	1.24043005009632	1.7414310255746	0.16433842737432	0.0968832581364776	0.441583155815197	-0.624968665323933	0.0680231308969669	1.3985093982748	-1.86965837700074	-1.49438891810701	-0.668335067701958	-1.06676962868378	0.726720517764322	-0.673207194993075	-1.00388549616164	0.0867923572192133	-1.25802116014974	-0.313900474402464	0.441748749763483	0.212098281692175	2.73418576265173	0.580606009349315
GTEx	GTEX-12584	GTEX-12584-1026-SM-59HK3	SRR1356487		106351824	72.53780057	14.76206746	0	1	0	0	0	1	0	-9.81034204242652	5.98006245709237	9.577302651258	-0.779257659642988	8.62854790127259	18.6603437468575	7.36256853546364	-8.91247560535019	3.83325180162641	-1.20686532946247	-0.667037070704423	0.676294545977271	1.51888065920549	1.74084654604376	-10.629117657886	-6.09014138706704	2.33490901957606	4.94863630044566	7.7726179335231	-1.29241673353599	-1.7821231970764	1.07273540753983	2.07953983909666	-4.67271356402912	-0.8173265115911	-0.150452069690525	-0.415600792708444	3.54622693144372	0.000378207006728705	4.0911175266537	-0.188136790115905	2.79466250147497	0.13315732383058	0.641160346002299	-2.29859091040548
GTEx	GTEX-12ZZX	GTEX-12ZZX-0626-SM-5EQ46	SRR1357323		93868524	86.52774598	3.000767329	1	0	0	0	1	0	0	-13.319712146732	-8.38136094553558	7.93148868042792	1.55820687570724	11.7585091005211	23.1871685231057	-7.64719571779668	-7.16245687599459	16.2858066652887	8.43143976844905	0.667665300634185	-3.14014773415157	-3.25004682523397	6.16387381295299	-7.4083792166072	-9.15393513348594	0.783798853520778	-3.05904211858507	7.31033953584874	-3.23195241185975	12.3701943252696	7.71303948663472	1.52214047250388	-1.27493506690038	3.98514066085583	4.55146426663664	-0.899718762757801	1.26224147991276	-1.90404938827931	-5.31672590160767	-4.10765228264735	7.29765659925996	-14.087894377628	-2.43288796911339	-0.577444784363887
GTEx	GTEX-13PVR	GTEX-13PVR-1026-SM-5QGQW	SRR1357558		70260650	58.46053801	38.09226644	0	1	0	0	0	0	1	-1.34209935810069	21.6392433838697	0.161433592240417	2.55976273093496	-3.40178686580518	-8.70976507372783	-2.50104360247352	-1.54147558113814	1.32995880027512	-0.504822294292296	1.42862363357178	-1.1111004415613	-2.06290126741996	0.605212262746152	1.35162100882196	0.729703930867924	-0.343654759831923	-0.456552875211243	-0.893989869310462	-0.288015727390598	0.0801861045765977	-0.675149012465562	-0.617124936852449	1.96376847108119	-0.222918974051053	0.167848228442836	-0.0134130658089066	-0.395677510444997	1.110288793286	-1.2874655567539	-1.02418265029759	0.964979265982142	0.0424696224112956	0.57834050510392	-0.277741376547836
GTEx	GTEX-1192X	GTEX-1192X-0726-SM-5987R	SRR1357650		99868340	69.74102503	20.15568497	0	1	0	0	0	1	0	-4.24364239246602	16.3643686002322	2.95291333929925	3.15143422619507	3.45494782743899	6.4276799235567	4.05595838229217	3.19378783604335	-0.63135622136567	0.170211310968364	-1.79783164468807	1.08120172534866	1.95290676954663	-1.69334958264336	0.960226558562553	0.0615036184114886	-0.227972911571832	1.63431627750681	1.87782901094443	0.607164418826413	-1.79068057420465	2.6493093331258	1.40335714810469	-1.31081958823651	-0.0189602015243142	-1.44844240207685	-1.60490216891394	0.575819995224635	0.852578708878703	3.26208456665039	1.99888736248099	-0.460994237613472	-1.36128086107602	-2.11522812077888	-1.642333557123
GTEx	GTEX-148VJ	GTEX-148VJ-1526-SM-5Q5DU	SRR1358017		85802074	28.01582628	64.87685135	0	1	0	0	0	0	1	-3.36152427708374	16.2274318851437	-0.303134617152505	3.2386996802972	-1.40127570176277	-5.20327307921259	-2.73607227882463	-4.06674137963409	2.11223868356736	0.777579282672934	-4.5735825564934	5.14507937335436	9.82305347659958	-4.38483234840073	-4.79081468353369	0.349629419450207	-0.617364297777566	-1.67719778570835	0.290755410232878	0.842059302936062	-0.505603953344007	1.09881726926638	0.86600277650102	2.0256517414328	-0.0526762560014271	0.784794628010929	-0.708938556338634	0.14695395879878	0.53503806835548	-0.350242798625727	0.48995725562694	0.554522298277556	-1.0845037584691	0.216649853678151	-0.88055062473133
GTEx	GTEX-13O3Q	GTEX-13O3Q-0326-SM-5L3FE	SRR1358482		78469764	80.40748791	10.15529497	0	1	0	0	0	1	0	-8.06464875279641	1.07030362660151	13.3170944730696	-3.05011776563793	3.6279466857284	17.9200274371686	11.0408113798647	-24.1327674598225	-4.71977493089898	-3.17496778279709	-1.95593148026989	0.739782283283846	1.52311067726037	-0.9419551241444	-1.35288877647267	-2.50696207673388	0.615045730050377	5.44881621120623	6.3017701979734	0.430206029570132	-6.91889980683814	7.05903298170664	-2.72886964315784	-5.47858319224025	3.33912137049477	0.202962756026359	6.1365728924512	-1.48856411409942	-4.24656096348298	1.7008927902819	1.72397418630126	-1.36163238044497	-2.2654673667586	1.66804421278829	-0.522604448953903
GTEx	GTEX-11EM3	GTEX-11EM3-0226-SM-5985Y	SRR1358539		89139800	83.26682806	5.996625525	1	0	0	1	0	0	0	-17.0051091430062	-12.4161192027957	-8.77342282009909	8.21645341480702	-0.42457536801635	-1.75268282721102	-4.83647748599609	1.55759156075093	-7.99832208241574	-5.92721137136348	-1.30562028128751	2.51992237513692	0.560499049861923	2.74808003660256	-2.1096551639552	-5.59007479057431	1.41518634080688	-3.49642716420869	1.06663713465756	-1.93391759742316	5.30491876217458	0.134734014952952	-1.6300274932327	-0.549364109992889	1.08948152880319	-1.88613938368174	0.649217717389586	-0.0207397584832841	0.532068488649325	2.46797497032049	2.07316306354082	0.17907075203482	-1.03446003972328	-0.754570381686218	-2.89112073112997
GTEx	GTEX-Y9LG	GTEX-Y9LG-0226-SM-4VBS4	SRR1358755		93306502	85.31839078	6.046127418	1	0	0	1	0	0	0	-22.3244324571179	-18.8230098051873	1.91395293827985	-9.7943719054749	-3.05932266078351	-7.37883441790212	-2.53692707735959	-0.651565267877354	-15.7333590573409	5.13194208441192	2.27673814500204	-0.798025204539881	1.50751731252413	0.842375795640505	2.71351666234419	-10.1327692750782	1.3191242572863	-3.64074460767372	-0.519124364719948	0.526658057887196	1.36718133382335	-3.11810700399835	3.26228138080048	1.43374697432346	-1.38660427153186	-2.70027096526129	-5.30898363862837	1.25713818705795	-1.37786033388719	1.48045582288905	0.244640546413655	4.33769579324503	-0.126288687744921	3.14203719996968	5.18110263978828
GTEx	GTEX-145MO	GTEX-145MO-1126-SM-5NQBX	SRR1358779		102906818	44.61937012	48.92290421	0	1	0	0	0	0	1	-3.16997515091687	18.8920513223671	0.7432252572245	2.73147543022573	-1.83712063723528	-6.41910617995352	-2.30403933262047	-3.64235627954808	1.89285421510182	0.457411102784133	-1.35140316354224	2.40514965950501	4.87593853808978	-2.15517374288357	-2.68820257758208	-0.157150455746711	0.0732032636406297	0.555250228363603	0.583823947539344	0.77764865542706	-0.490104704471555	-0.231662872938559	-0.806085799868652	-0.372802771527804	0.254658636526645	-0.127874815249016	-0.143303184149579	0.371867026313297	0.612793574966461	0.751475474325984	0.736852735663995	-0.00345198149099963	0.384256414122831	-0.023364147413737	0.361212699423189
GTEx	GTEX-ZAB4	GTEX-ZAB4-0726-SM-5HL8I	SRR1360299		77167146	88.56159589	3.144426256	1	0	0	0	1	0	0	-15.176853826431	-8.25388388245486	2.99302354493636	-1.084000455903	6.81588037985677	8.79144049921915	-10.9687154961141	1.78874707855352	9.60242382077655	11.3778287517986	-7.77485432424223	3.38452313779868	-3.612243899121	2.65515458543811	4.17244042584518	-7.43171501741824	-0.303089057961637	5.27986946850564	2.64653262818391	-0.0842016896001392	8.50333406085979	5.8230826820182	0.917974125230643	0.450328432753544	0.441016746665098	4.56746171716842	3.74218059069407	0.411085677118974	0.399644554513371	-4.33193379740141	-3.3479412443799	0.800633228772093	-3.85481555562119	-1.44749197015055	0.408483984140803
GTEx	GTEX-12C56	GTEX-12C56-0226-SM-5N9FB	SRR1360338		124591664	84.99726113	8.284515728	1	0	0	1	0	0	0	-15.9267149359752	-10.2851167949018	-7.01635847725107	6.30552784694097	0.502516190201688	-2.51985239992561	-5.31493060835264	1.7273534534899	-5.86212658505906	-2.10569184156412	-1.13182463764534	2.75224783173373	2.64543342106546	0.627574555863351	0.750951183994911	-5.27603067250503	0.811448895575232	-0.702713789210202	0.587754597111292	-0.454579308564691	3.54842626732897	0.366528811360319	-0.625699110740322	0.566839129026642	-0.478820468467718	-1.59136969484285	-0.865890433047077	2.35190877009216	2.38866053020369	0.0754442790217719	2.20677419052472	-0.681608611942241	-0.412575207583882	2.3808348854554	-0.45194235698361
GTEx	GTEX-117YX	GTEX-117YX-1726-SM-5GZZS	SRR1360420		106768802	87.15232002	5.470088538	1	0	0	0	1	0	0	-19.0344789514068	-18.5068822120277	23.2023107882515	-33.0603741775757	-2.05613129404565	-7.41358584649097	-1.28753834848254	1.72557696241231	-3.21152037571441	-2.91734074865292	4.8778654639662	-4.51208799454134	1.33382756259979	-2.01874725051001	0.838286890454776	-4.9826126182408	2.88385853123771	4.84211618131386	0.390809661651667	4.97451528542166	-0.553429789263597	4.04448495558324	3.073189008253	-0.0609950871066464	-4.55419332429796	-7.58223048618156	-9.38606860848776	-3.27404498873117	-3.58046033016729	-0.742336515640568	6.18243770525891	-0.440947331688376	-8.25185497449122	7.30112361574632	10.9507073620482
GTEx	GTEX-13CF3	GTEX-13CF3-0726-SM-5J2MY	SRR1360442		103058248	68.36067502	25.62231409	0	1	0	0	0	0	1	-1.73288447883003	19.5524722870149	1.61848016227631	0.754197321206036	-3.12948694964699	-6.69444986265432	-3.12340537916531	-4.65459764256987	0.561457154504357	-3.30474238201782	1.14532542532255	-1.61750683011597	-5.07296631958219	2.43623355974721	2.94422809964649	-0.316162146933896	0.0518304120245719	-0.281419506556106	0.402638058396715	-0.249172054769074	-2.93069092372664	3.27047524731883	2.31324286317586	3.94453417460995	-1.41554843956548	0.0453739620257496	0.27985499490676	-0.412780111841653	1.73433215862268	-0.0416400779736556	0.396037155043115	0.916345188252175	-0.0588036607544681	-0.82870706856032	-1.74431655968611
GTEx	GTEX-13PVR	GTEX-13PVR-0926-SM-5S2RB	SRR1360587		64850030	65.67677764	29.92329842	0	1	0	0	0	1	0	-3.91315538027631	17.3778302739168	4.67388698335621	-1.5381492532576	3.07019617688529	5.02134948970961	4.39966818464871	5.97464515441567	-6.93229231348332	-0.672662310228933	-0.744704798457864	0.427980128486109	0.742883525760288	-1.47431574391611	0.587709536142098	3.07112366652533	-0.492029156381846	-0.531517945737564	1.58235720064751	-1.61678331028458	1.01066931732093	-1.10224849122739	-0.514017707299161	3.82865496793832	-1.60293066508471	0.384348729058197	1.27416281860351	0.173725947921085	0.332114485878362	-2.29316614955127	-0.932967317248475	2.27968515144853	-1.36979039039815	-0.346775528304848	-2.41798019533957
GTEx	GTEX-YEC3	GTEX-YEC3-0426-SM-5IFK1	SRR1361156		117548690	62.25161505	32.93931561	0	1	0	0	0	1	0	-4.21398769933119	16.6046003472184	5.00270961418072	-1.97250570858612	3.04763142346862	4.25990549041414	3.97576625809052	6.64270191689826	-7.7637165876401	-1.42244325978559	-0.852540971802305	0.847009147017396	0.260356204163833	-0.9155819912045	0.53160684485047	2.59142021039405	-0.906335341999535	-1.16274007356204	0.26430061577066	-1.71006923276525	1.24309604205328	-3.61996248099273	0.657090151703847	4.4380373390721	-1.72381916738977	1.17965519572563	0.46157076176691	0.228726494171686	-0.851413332877178	-1.96389375681652	-0.2341427164596	1.40534936085893	-3.51009758105683	-1.27211833785599	-0.0391716169420639
GTEx	GTEX-VJWN	GTEX-VJWN-1026-SM-4M1ZN	SRR1362488		53963628	75.37055515	18.25996577	0	1	0	0	0	1	0	-7.87367310238911	12.9776709847523	9.06773748967981	-1.8117431973921	7.1579081081183	16.8537221007493	10.5705581613986	1.01141073952212	-2.18107801351397	-1.52527608163777	1.23990667130251	-1.37430170164973	-0.422217694261466	-0.318410755833286	-4.87658584718499	-0.34985508868588	0.142112828284982	2.44856359583349	5.66476948638532	-1.83963961236309	-0.0810678040372685	-1.97517658255139	-2.07902086834184	-1.92914252663718	-1.15240902636562	-0.854093351733719	-2.99242117953711	1.55813590748819	0.703202329178683	-1.33954216618401	-2.94637706467297	3.50584711418967	1.38925583071261	4.00456226092002	-1.22101914708101
GTEx	GTEX-11EQ8	GTEX-11EQ8-1326-SM-5EGJQ	SRR1362824		121045408	55.43981478	21.38898982	0	1	0	0	0	1	0	-4.77169764769512	13.8045133560971	4.35299244713799	1.02664269905345	4.46681577431533	6.61609008985423	3.96860804807693	2.67963783822394	1.6134081926764	2.64657773322681	-0.847673381976045	0.548688790772651	4.55429672813543	-0.918448497698669	-0.698961185451212	-2.86122134975469	0.320061255812527	0.0549754684862595	-0.898859102034365	1.35923780455625	-0.772389614769836	3.62112926898485	1.97490677027231	-3.86115005888999	1.74373350534873	-0.771898861370571	0.0329836558523077	0.784305831039247	-0.477247595638316	1.22272700708245	-4.91652130221785	1.79642766864014	2.91585759960709	-3.69257766179273	5.17771900562101
GTEx	GTEX-11ZTS	GTEX-11ZTS-1026-SM-5LU8O	SRR1362848		85936512	88.90732033	3.645654131	1	0	0	0	1	0	0	-14.1749480479026	-9.90567261061619	-1.79215226968688	4.5854639399598	7.37582729970942	7.21325358967328	-8.87992768727903	3.55271676611308	10.9806963243286	15.2435165548473	-6.3968031080659	0.978285423638115	-4.29904323317511	1.95691885755148	-2.20585531361116	-3.14237791824066	-0.308045040966843	1.27288630024267	2.74753039373043	0.104223062071684	-3.64254005785809	-2.48954152152412	-0.758846111540991	1.92719337584853	-0.0658360324832515	-3.67582383198568	-2.0687503050797	-3.71920849958979	-2.21096847554588	2.00484764972087	0.627845224232345	1.42870904475346	-2.72979121260282	1.62865606091636	-0.0773308309618457
GTEx	GTEX-13X6J	GTEX-13X6J-1326-SM-5QGOV	SRR1362906		80805968	87.04036563	3.539369765	1	0	0	0	1	0	0	-16.027387715065	-17.2965444977917	17.8269052668203	-12.3014279582381	11.7563271704899	16.6226335455878	-3.45300822207024	6.27725810663218	29.9049585897201	9.0630502987286	0.980479807243775	0.903586303047433	-4.2163152213646	8.87469842465512	-7.04081428974067	-16.2139311297003	0.117051282666001	7.55374902873214	-17.5949624433939	2.2702020585061	9.38226363818464	7.08085075022419	-3.35530047502791	10.5718632183094	8.37232242149885	9.37691554937766	5.89146308418513	-5.82445676142234	1.59994128774254	-7.18405290557418	1.98818758783643	-3.96018293356582	-2.5754914813437	0.646230937790266	3.67628700342663
GTEx	GTEX-1497J	GTEX-1497J-1226-SM-5Q5BL	SRR1364695		82735022	48.77221886	45.56866378	0	1	0	0	0	0	1	-3.14416576119744	18.1977627953983	0.65116705060076	1.8319612217142	-2.31441072590659	-7.67885849345402	-4.16066463009198	-2.89907923117648	1.5191847027732	1.00666394731761	-0.97233174063676	2.12685622275792	4.63520842177498	-2.22360304730338	-1.19076363772804	-0.317274929006958	-0.0804925934314153	0.356248939203342	-0.181286161390304	1.1526410676916	-0.0366974522377526	0.328588698504422	0.214901762584164	1.13045829452576	-0.478142370425573	0.412616398582817	0.317960990943101	0.747526069087569	0.636452821722411	0.237447758449569	1.02873401800226	0.55342438311379	-0.562498523236444	-0.254660576764376	0.0631507972317672
GTEx	GTEX-14E6D	GTEX-14E6D-0926-SM-5S2QV	SRR1364780		58744442	22.83539267	72.91655268	0	1	0	0	0	0	1	-2.59451540470933	16.3727289629375	-1.34286186189938	3.07371088382267	-1.36527828900547	-6.71411321873482	-3.65844865104314	-0.654895788324883	2.16964755506256	2.3075335869104	-4.26714792907749	4.54915983558504	10.0439207337415	-4.92917165158087	-4.09424237711441	0.594430686906314	-0.989774810842318	-1.70581968105528	-0.393640215917258	2.04113062380593	-0.454532400498127	1.78135535307586	0.0195035341574105	2.16525308168551	0.50518652299364	-0.462558092106084	-0.923283721161684	-1.32684866494022	0.798949257607722	-1.26544696221654	-0.245569172400448	0.104367331017645	-1.01792434181801	0.221172824754931	0.611382482760268
GTEx	GTEX-12KS4	GTEX-12KS4-0626-SM-5PNY4	SRR1365270		97856346	90.3245907	2.425788512	1	0	0	1	0	0	0	-20.1696175072839	-18.4966662699716	-11.0149849115117	12.2434544398034	3.15767015272067	5.69315517087372	0.96302388209134	-1.94176277845225	2.85719737211752	1.4156462055235	6.72329497238524	-3.55597553203695	2.16827451442372	0.4774379807747	2.91337942723766	-6.43969169880481	0.0853559246659408	-5.36865293340204	4.07257938312182	-3.21654320946408	1.04150603192958	-3.91569109919081	-2.14600394393046	5.57829649607679	-3.03928643991045	-1.33179159143694	-0.985504674128584	1.45350527971122	3.08403764139585	-0.736845550710888	0.943575955305925	-3.12818806474075	1.89733595661297	0.847675692590883	0.740395956994877
GTEx	GTEX-11NV4	GTEX-11NV4-0826-SM-5BC4S	SRR1365700		109144418	68.63495484	18.53510456	0	1	0	0	0	1	0	-2.8098652394171	17.5082539979679	3.58808097359768	2.63351036933622	4.31307380507909	6.46960960115334	4.77340644256634	7.76537425539542	0.309045201855442	3.69335261682875	1.21953195925822	-1.8076687580882	-0.560044935872933	-0.421596341152055	-0.505029202528464	0.355429654402155	-0.190551797647838	1.2650473873399	0.858847139676907	0.34461623452914	4.29827202959409	-0.0600483259374903	0.159244795235567	-2.96308678570139	1.10300021471175	0.000536789671123291	0.362434815180585	-1.62466508412898	-2.51135303887023	1.59517906488748	-0.36312048544273	-2.3953113674657	0.867744881298503	-0.908094347048452	3.45466875955527
GTEx	GTEX-QEG5	GTEX-QEG5-1026-SM-4R1KT	SRR1365791		78095774	90.49649473	3.238062536	1	0	0	0	1	0	0	-15.0528059670163	-10.1702864808367	4.30693116527888	-2.6758055827237	3.66824503428814	8.32173766837513	-9.95395061797396	-9.91616307530055	1.62617310122808	-0.688554605110989	-11.1542625699206	5.75981686895904	-2.80882005413709	0.5627202656263	9.72228722798329	-1.08543607812973	-1.28206614693367	-2.88758152528772	-4.40569300660956	1.20528422136412	2.49464770541964	-3.78319125024154	-1.56838530387859	1.02372864003562	-0.344812871074064	-1.15250895491755	-1.39572638310984	-1.33586403070008	0.704843606239771	1.12998067352615	-0.703268384634315	-0.44054401911919	4.15309890749087	1.74804533133612	0.495780936566443
GTEx	GTEX-ZDXO	GTEX-ZDXO-2726-SM-4WKFA	SRR1365963		88021360	89.40691214	2.807838915	1	0	0	1	0	0	0	-22.6488517744391	-23.6664552738203	1.3055000043487	-3.40689863201753	0.125740961767989	1.63128049675082	8.61098989436024	-2.63786609755991	6.18002171716249	6.33411622929274	3.81853028710896	-4.52633770031634	-0.645670037198042	-1.84817149811286	-3.8050675303677	3.13407994369193	-0.540248324247866	2.64776311118728	-4.4098772364775	2.49261420473541	2.92972414170083	-0.78349381234099	7.54913873518851	3.50273420844334	-4.29854051773789	-1.33767571110458	-3.75924548072228	-0.428848474770167	-1.00091305667119	1.55882677868183	0.85494185059066	3.87564904256925	-2.39342948355681	-1.02142817918529	-0.0569142263268536
GTEx	GTEX-ZYWO	GTEX-ZYWO-0526-SM-5E45I	SRR1366367		86014578	66.12142188	25.41474772	0	1	0	0	0	1	0	-2.68147414716464	16.6654859855513	3.39094672656488	-0.225035553741484	2.348304090852	3.77325694574059	4.46347143102293	6.94941027671323	-7.47045709948111	-0.114401611660729	-2.26469395817649	0.767447857268695	-0.044440171466832	-0.60625533728712	4.1888058838444	0.989216467676375	-0.520220204021915	-0.871150428676282	-0.391855742560622	0.811696626388395	-1.1305088472539	1.65270223087129	2.81282999613072	2.69174243402748	-0.248145419192925	-0.497599231112641	2.06570455675803	-0.844656688488009	-1.68680336886084	1.35903444788011	0.244133569160697	0.508584104526858	-0.649059485959366	-2.4329068608018	-0.840240185582187
GTEx	GTEX-ZDXO	GTEX-ZDXO-0426-SM-4WKF6	SRR1366519		78977982	80.40891954	13.10733668	0	1	0	0	0	1	0	-2.31433071903013	15.8834017362381	6.58862831909076	1.30964832146856	8.46443161703171	14.3552483376044	7.94175060897869	10.1385091675977	-0.696671940375786	1.32721398865477	1.65202433569609	-1.37204522894063	-1.57661913022797	1.84635518070397	-1.64103168625886	-1.48690681385765	0.679369645589406	1.60465246679331	-2.17418430254327	-0.938732563308085	3.31278125255821	-0.315316665278325	-3.11646017705194	0.721444859430022	1.2183070418382	0.20491973147776	-3.24017450925266	-3.17420267405909	1.27425641301086	-0.396821390118425	-0.424344338133292	-3.40786310714417	3.38743586931297	1.52830458205892	1.29404292175194
GTEx	GTEX-13OVI	GTEX-13OVI-0326-SM-5K7X1	SRR1366855		85023204	67.63404729	25.77536833	0	1	0	0	0	1	0	-1.98868970434759	18.2268179283888	1.55513414769982	2.1323434816917	0.587702641390617	-0.00710015720813194	2.04817978480372	4.31010971771233	-3.50034959323811	-0.870533359120146	-1.64432391245685	0.733906837329918	0.257918664098784	-0.835258542367057	2.58169400493916	2.05094008379685	-0.390093804325987	-0.437080966312841	0.601210081767818	0.65370299580859	-1.61490083635136	1.52983955543979	2.32443160512425	2.70840034332937	-0.903745255447975	0.335886689719915	-0.184239221332864	-0.0252451324335243	0.038132962777899	1.63135205217861	2.2446035559993	-0.647373914206117	-3.14692444472553	-0.91030306028922	-2.38489601672844
GTEx	GTEX-13OW6	GTEX-13OW6-1526-SM-5L3HX	SRR1367005		77193126	91.14144179	1.916792436	1	0	0	1	0	0	0	-23.1161808157685	-23.47928012541	-5.29806643767374	-3.38960073794815	-6.62553615838633	-7.89227032398053	17.4374529885126	10.4421890469818	22.3898351922962	-12.3237865175185	0.783852688413124	0.376094377481805	3.36414266813886	-2.0646002906165	5.57357802923303	0.507382035633467	0.131972006917937	-3.12314811421716	6.74571824311006	-3.13742219600097	-0.717857854109522	2.28037568951642	-2.96477484443098	1.92039723417663	1.3166415773656	1.6932385161175	2.69182601129929	-0.118213779175863	-1.82596312752916	-1.1935237191145	0.778655130634168	1.31409835430017	-2.28672786358307	0.792011427908206	1.94003247572566
GTEx	GTEX-ZAJG	GTEX-ZAJG-0826-SM-5PNVA	SRR1367456		85191930	65.63632964	26.54500021	0	1	0	0	0	0	1	-5.81268554134429	13.2788618093102	5.4314765939683	-2.91109845318531	-2.10590098955766	-3.7898223914835	1.62439967089169	-10.490685278282	1.34923670808103	1.30608728165526	0.484027613008043	0.217265995345996	1.03126872911926	0.209383244386118	-3.84981939554026	-4.17456424375219	-0.309070035940088	-0.236183449607456	-0.782289883956292	2.74279473301577	-3.70549938099155	0.806987345677317	2.18937667017942	-3.86441071133653	-0.581378309644183	-0.934271915364793	3.38609624840815	1.06358657076113	-0.208339140750934	1.10171312692354	-1.83283128507693	-0.883112085927477	2.37758619035321	-0.374658588049601	0.553841304046329
GTEx	GTEX-131YS	GTEX-131YS-1126-SM-5N9FQ	SRR1367478		118536040	88.77439975	3.329969518	1	0	0	1	0	0	0	-18.8721455838566	-19.6996747843374	-14.7907091288957	17.2461755413503	2.08563681691035	5.33705420554921	5.2056603353299	-0.604001609103284	6.94455094957477	3.926899408309	9.02226169404525	-5.9299986688507	1.03092268835276	-4.36422998207426	3.52946937352308	3.92084950873656	-1.9723241459928	0.295253511538527	2.2551086232453	-0.0505712561759578	-7.47273111013165	-0.138883043840569	-1.99652950328975	0.22389767896998	-0.425875817365295	0.594569569611863	-0.993085235108443	-0.500181934097338	0.734801286075599	-2.58736987328585	-1.90324550236157	0.814590307849923	-2.17967358725534	-3.44976232371937	-1.23632581238742
GTEx	GTEX-ZGAY	GTEX-ZGAY-0426-SM-4WWAM	SRR1367566		84408646	84.84617085	8.380153379	1	0	0	0	1	0	0	-13.9665911321211	-7.06219053670666	4.017187859361	-5.49414151384762	3.5833749542963	1.8035012298698	-17.3502071100993	3.33131732164115	0.158571291257205	3.44403294205553	-3.76202945600243	0.613761272645747	-1.410483170249	-0.698160689948363	1.76093026975392	0.84094132796805	-1.44535015084651	-2.00926611535717	-0.155566794055696	0.991901786069566	-3.1702317387021	0.0370362980052588	-1.22283107052001	-1.49141401162819	0.912798578807374	-0.633983703023522	0.0146951521645415	-1.01417968391962	-2.28756436806722	-0.879082860577328	-0.649132075249441	0.086825819594575	-1.39893395559429	-0.0148668292642698	2.07715826366653
GTEx	GTEX-WY7C	GTEX-WY7C-1526-SM-4OND2	SRR1367761		77095992	87.64811535	5.228064255	1	0	0	0	1	0	0	-16.3163132214081	-12.6453293378482	3.35475794619153	-7.87283760067426	-1.96581551565244	-4.40621275555859	-9.61776629779769	7.5775835040435	-1.01601925994837	2.50931427548217	-5.20837923982109	5.95785122613538	-3.4765994017729	-2.80123828841769	3.63950140613114	1.68456814167086	-1.93897843262516	-1.26851866014175	1.16548714508803	-8.02882249738516	-6.22088133783724	-4.25372241794061	2.05623891805022	-6.41740009620676	0.689676058147562	3.3836801270665	1.71899425715628	-6.02372214527515	6.31401107802647	1.07529316704117	0.416810193484886	-3.65901482945241	-1.79374787802602	2.56208891042043	3.65253504710484
GTEx	GTEX-12ZZX	GTEX-12ZZX-1026-SM-5LZUW	SRR1367807		71814146	87.19970018	2.264080394	1	0	0	1	0	0	0	-16.3164924252056	-16.621943152733	-15.3287054250982	17.4396399648878	2.1501224477961	3.2321678047504	0.873066624032645	3.14858457544108	4.58934172324467	0.179607579907979	7.71588148161967	-3.85069417071288	5.47804730962646	2.8938180875649	2.29917939764269	-2.0505439997964	7.87247511706859	-3.71933200118027	-0.311513986717897	-2.99126450389234	-3.02043231165468	0.420145858141707	0.623908506925378	3.9490360103382	3.23130735464983	-1.2883093995089	3.14659676307681	0.558833126778152	-2.14045199606018	-1.53640432496697	-1.92948123341362	1.57718941143395	0.291680055225679	1.6946150482769	2.02999323389792
GTEx	GTEX-131XG	GTEX-131XG-0526-SM-5DUWF	SRR1367849		68151846	67.44257815	26.53606184	0	1	0	0	0	1	0	-1.90917379757517	19.221418253586	3.36302631134431	0.0811843008274231	2.93265863180912	4.36557550878995	4.45486307751215	8.6427453887104	-6.72872493452709	-1.00642108370152	-1.24127245666322	0.774151580292393	-0.521775782249101	-0.848789782766631	4.00455747927292	3.09079038438003	-0.581207894077858	-0.753928042265118	0.357532072316418	-0.306901006661201	0.843273724866558	0.0134193097152217	1.38289176669959	4.41682310745734	-1.78002162301591	0.124404269775943	2.6220859822276	0.136346057878751	-0.68168184146205	-0.836325782434284	0.360400587482369	1.74742957250526	-1.65555243120157	-2.26171673124112	-0.884098759127722
GTEx	GTEX-PWCY	GTEX-PWCY-0326-SM-43IRU	SRR1368668		75297804	91.44202134	3.628233301	1	0	0	1	0	0	0	-17.3459087189429	-16.3334904595025	-10.3835343631193	9.71316079038104	-1.25902193879447	-4.40969462006787	-4.25579471865849	5.91689857814838	-8.31870250742895	-3.70300259341215	0.834705859764718	0.317805392598795	0.91835153821102	1.96139965121693	-1.04995709609352	-6.62623667448242	1.76324036071476	-1.25110013274233	0.697544910116781	0.876148210379633	1.80736507584047	2.43131658418579	-1.22074309632051	-0.797591749182177	0.933052900971804	-2.48734939381028	3.01633983234374	0.469865233280074	-1.90896032148066	0.781121024773373	1.68157269815172	0.183783353669108	-1.94546818695696	5.80511109100918	-1.1811715014139
GTEx	GTEX-1117F	GTEX-1117F-0726-SM-5GIEN	SRR1368794		78461584	69.22511531	21.97935744	0	1	0	0	0	1	0	-7.90824275753965	8.28767452452611	7.46166794033098	-5.49659614793706	0.724925905146654	3.32631588109372	7.81345127052408	0.128130762965044	6.93213746870991	-2.67167781916342	-2.21232804214113	1.35105110318761	3.98296229813587	-3.78216409467985	3.0945655846809	-1.17937093830775	0.656555775683209	2.78615813895	1.5152291031997	1.63756021948591	-1.91352661532819	2.02032294964665	2.17834134069269	-1.4770112580349	-1.30308012536215	-3.73386919782419	-3.30647560090461	0.423621312879626	1.06045746877499	2.12477567606407	2.96646454495258	1.04688654952492	-3.97462216863419	0.728535081651362	-2.55331127771663
GTEx	GTEX-11GSP	GTEX-11GSP-1226-SM-5985M	SRR1369030		102297546	69.4717232	19.11233335	0	1	0	0	0	1	0	-3.28083017977225	11.4152780182838	5.36767872385608	1.7517771807513	3.98324499565887	7.79707096831972	6.54612190111036	0.0855948847294976	0.717932301399744	-1.64175606275257	-0.903325890598088	0.878884173245116	-0.604292975360422	1.36891251155866	-2.59938335147107	-2.05697169263948	-0.646907625718816	0.389377049160724	-9.19948251446606	2.58346758960525	-4.09232993101047	0.819769270675473	-3.99947244887967	1.12739761010899	4.21725743905129	2.83657451222705	-2.3211323813877	-2.51232521729122	2.05226032099144	0.76601306642463	5.93181284689881	-3.26419212277866	-2.23159886341424	0.12567025789649	0.530835605074462
GTEx	GTEX-14A5I	GTEX-14A5I-1326-SM-5SIAQ	SRR1369172		93041522	87.26630031	1.936546137	1	0	0	1	0	0	0	-20.7463844252638	-18.7460070071223	-8.13673256690159	9.92384623855905	2.145294880941	6.24879352403049	1.76637791887014	-7.60862966030561	0.303089679606141	-1.73731425122234	3.20316036441925	-1.18677973101102	1.82994904362817	-0.411095744843791	4.74622559780326	-4.6495065536087	0.882797045263626	-2.18513954443461	0.552865999003545	-1.06982883391597	1.16245465764973	-1.66638137399989	-1.27835262942764	2.76522307077715	1.51458709766272	-2.94607372644041	-2.14397786836813	-0.859068880671216	-1.32667634595764	3.52842651039446	0.987708282981331	8.20820078541832	1.1728219593913	0.37478710676508	4.12438327203661
GTEx	GTEX-ZPU1	GTEX-ZPU1-0626-SM-4YCDM	SRR1369536		105017386	55.43197962	37.20383594	0	1	0	0	0	0	1	-0.732008403804081	21.1083788781493	-0.429586865190744	2.61765880838657	-3.16720443734634	-7.9546574195087	-1.20256103125587	-1.88680681745659	2.3330450289814	0.785305135749373	0.828238426561004	-0.422034919719298	-0.0831532534013318	-0.595820080346084	-0.418557464738949	0.100973229193617	-0.454387665813305	-0.026431948740377	-1.0044070329128	0.760162316160591	1.14314453710006	-1.58197892264636	-0.0866695100297526	-1.06297294162336	1.08316707864869	0.720616880434424	1.42075235142836	0.450856257909718	-1.04234363577315	0.127931185897675	-0.171571771541753	-0.2905352918793	-0.963442427633901	-0.284166612098492	0.490886058768055
GTEx	GTEX-ZGAY	GTEX-ZGAY-0326-SM-57WF5	SRR1370659		123079096	61.79071871	32.00392047	0	1	0	0	0	0	1	-0.622547630011156	21.341691574142	0.30713318822604	2.39093897435519	-4.38722084693837	-9.32216823259619	-1.55584848330871	-3.03010086631637	1.13354706060894	-0.79838094322192	1.82448939795563	-2.34322669160356	-5.50060928353409	2.96080064770166	1.41236991115798	-0.785192358472984	-0.0604656053363918	-1.42182585347053	-0.373144809070011	-0.247789253891758	-1.26922963338936	2.82594760956957	1.19213026843244	1.12138417391401	-0.0609099018428964	-0.144306695711995	-0.742548039569537	-1.9476569044984	0.219522413026758	-0.457371616955146	-1.12919325787228	-1.11091279719237	-0.227476378209378	-0.853117027142995	-0.0586454141472922
GTEx	GTEX-12BJ1	GTEX-12BJ1-0326-SM-5FQUB	SRR1374028		115542046	56.97011632	36.21510389	0	1	0	0	0	1	0	-4.10188848996532	14.8571290271393	4.56325505179357	-0.930592336461612	0.467374372031313	1.22174401406739	2.79921310264663	-4.30589757506485	-7.10017943465486	-2.66275827636653	-3.72494524967139	2.77698056216152	3.1574977552761	-1.09182560674291	-0.791211929249299	1.13457138137288	-0.334604719494241	-0.43797265456473	2.18572555702419	-0.261579611733126	-3.39541320104471	0.364384866198541	1.1512634210028	3.27216526064218	-0.792471735283531	2.0751437348709	4.49723050787886	0.0308963522782492	-1.55166352133606	-0.910694631896112	0.939161851735304	-0.654060013028349	-1.73641787600363	-1.51223433190122	-0.142204270487269
GTEx	GTEX-11TUW	GTEX-11TUW-0926-SM-5EQMW	SRR1374198		83261548	88.20083672	3.019948656	1	0	0	1	0	0	0	-18.0868413506309	-18.8990947728394	-8.8698858442711	8.97264677193152	-2.76372834596808	1.6782902595117	8.76048212029928	-7.7404406953811	5.72990111168786	-9.04894326981366	-4.32207220810275	1.05032561432262	-0.874585828876639	-4.2939437148778	3.31062588086056	13.0010055878813	-2.84383828417488	5.32215519048216	-5.48696978779424	2.27175554143817	7.79327927452093	-1.90813947946991	3.54786263732988	1.85238831110713	-4.11547093387564	-0.599171674826369	2.86180431415352	-0.33135816586301	0.126260480485479	-5.88793874816464	-1.83430005906675	-6.94796289630283	-3.45957905647111	2.42723841407128	4.36412457934377
GTEx	GTEX-ZC5H	GTEX-ZC5H-1026-SM-5CVN1	SRR1375462		92680238	82.87543457	1.844442825	1	0	0	1	0	0	0	-18.2436280234389	-18.9944961450276	-10.2016809884993	12.2571868729959	0.686796982562429	1.64136885269513	5.2136189078951	-4.16290378659588	2.07635763377125	0.508551301962014	6.42003713528638	-3.29993545993084	4.01936475949929	-6.84716651452432	12.7706849457272	-1.77394085221597	-2.93222104719928	-1.64081591147724	-1.89178275724033	1.85345962794583	-2.33526964927114	-0.264585409155326	0.612349251490586	-6.65196763765429	3.23817220517027	2.34840335513007	2.77574602659264	-3.155631325387	-1.03069382467115	-2.47763623442426	-5.3017138284205	-2.96102231947786	-1.85026033518852	-5.14535324099806	0.529270946806643
GTEx	GTEX-ZF2S	GTEX-ZF2S-1026-SM-4WWB1	SRR1375677		109746496	67.92889315	26.34725759	0	1	0	0	0	0	1	0.390814437455462	19.508123836729	0.296917320702465	1.95478217853395	-3.06444336111338	-7.74875290846225	-0.599282229521346	-2.67598047066717	1.90106776640225	0.546617392220404	1.18396374816392	-2.26263322639823	-2.93519301478045	1.20327645375659	0.0437056964174506	-0.59548359148275	-0.0416045090841741	-0.121874816456754	-0.914907489240708	0.974775060956878	-0.996466029144671	0.833546116365798	0.158599753316428	-0.92282255032631	-0.237232842343552	-0.486667329851886	-0.632120726754842	-2.02974986476388	-0.761797853613199	-1.5085235019578	-0.692141145681892	-0.611839518162264	0.192888313649187	0.430087552120097	-0.107472768358592
GTEx	GTEX-13FTX	GTEX-13FTX-0226-SM-5K7TX	SRR1375756		103129632	88.50033131	4.692088885	1	0	0	1	0	0	0	-17.4469892219182	-16.1790607084077	-7.61248506505155	6.64261960836877	-0.67944434571054	-2.1758079945943	-3.39276415642346	2.21097624252393	-9.97283311382958	-3.85528408602183	2.72031035756263	1.69571903549246	1.55859473809264	1.38129388235671	-2.48230312400114	-7.00306318881852	1.50586691464927	3.79496538047951	4.7706346038876	-1.33086090275764	-1.52229585761515	-2.46094825601679	-2.00387656008753	-0.688346433121989	-0.176815464839325	1.8364757069859	6.12083636774711	1.03115350713743	0.8781488983721	-0.556424161637493	-2.53485924865596	-1.95801087655211	1.61213208060471	-0.0415668969100514	-2.42954506611085
GTEx	GTEX-13O21	GTEX-13O21-2926-SM-5J1OU	SRR1376228		98789970	88.61059073	4.33576607	1	0	0	0	1	0	0	-20.4505943216966	-15.5546431261084	11.1595249477475	-19.0328575004705	1.99813261652166	-0.48292223619863	-17.0941326307929	5.57405202364942	0.00299167594706123	1.94935648164068	1.04201499179526	-2.10883231239712	-2.11306720250127	-0.940806752247127	2.45730201351611	2.72313290491924	-1.29516552394891	1.1638011167023	-0.399335851121546	0.0197618724347698	-5.23463165806229	-0.562584874840076	-1.48533070849387	-0.432118321205232	-0.0950023791316397	-1.40258391853338	-0.533702423681466	1.47644063913463	1.95535774611929	-0.0962110078058211	-2.43514292846767	1.95947052491487	0.0170901857759471	-1.35252980247391	3.71527033861111
GTEx	GTEX-1122O	GTEX-1122O-1126-SM-5NQ8X	SRR1376334		65762766	90.3210975	3.907244412	1	0	0	1	0	0	0	-16.5087018279857	-16.1386717782869	-10.8394015197689	10.7955378279224	-3.10547647993367	-5.79679657835148	-0.405978525002233	3.93816781012085	-7.5161483943584	-6.10911167552251	-4.62984454392581	1.53884037039133	-2.96597612836954	1.06370651194814	-7.83918200975125	5.2800778451886	0.0536380309360131	6.2327835155453	-3.34286657956033	3.78240099115886	2.31006957568109	6.2080765146819	2.96443806279533	-2.33172289087651	1.44371751041599	-0.700812188532135	0.0165874836660002	0.0948040221281484	-0.560163406349657	1.62726039706619	-0.249503847901137	2.47516615965517	2.50356226096483	1.54868280069065	0.241342651680291
GTEx	GTEX-13FHP	GTEX-13FHP-1026-SM-5K7Y2	SRR1376539		84036986	20.66259492	72.27603808	0	1	0	0	0	0	1	-2.44109288193551	16.9355103172511	-1.51508811437484	3.72584295007138	-1.77968135754432	-7.12058368761239	-3.13536226133559	-0.983778423041329	1.96861933909356	2.1462064676224	-4.2810514204596	5.00388329677912	10.5873984399148	-4.66926799467043	-4.73231126611198	0.786298768190184	-0.579186617789478	-2.02366461421788	-0.512785767002381	1.13176512584601	-0.229725280281481	1.25270581472452	-0.163912100377962	1.90027853465086	0.968777237846785	0.0201320387482682	-0.133721114920173	-0.464172679880156	0.529226877056112	-0.684930895715338	0.576504312181947	-0.781684785424404	-1.93976574265022	-1.37100183186692	0.135012153083941
GTEx	GTEX-11TT1	GTEX-11TT1-1426-SM-5EGIA	SRR1378243		75327378	68.79939721	22.52138924	0	1	0	0	0	1	0	-2.08121557777231	14.4224685443522	4.25680687573746	0.123037494263583	1.35721674175295	3.42835282900542	0.772971313344943	-1.06832659133879	-4.66184251094593	-4.22562027685762	-3.33517061995762	1.90644637460221	-2.00052489706825	0.586623850988497	4.15589658999741	-0.635973829643338	-1.12249959476786	-3.81394204090116	-1.15361716122761	0.49869539913079	-2.21266807450731	2.37370260703089	4.95584584960595	3.95812552352874	-1.47969090310156	2.54964316669706	2.98848117105526	0.26086948488499	-2.41294827328411	0.365252094980352	2.05245057217507	-0.498245100628847	0.32268065900306	-1.87313622352382	-1.4042223379229
GTEx	GTEX-13O3P	GTEX-13O3P-1126-SM-5L3FG	SRR1379324		76349076	86.84977668	2.098183873	1	0	0	1	0	0	0	-18.5682735524583	-15.5397999748272	-7.10629486474805	7.58972920433602	-0.010308068156577	2.9667086959605	3.08557251958163	-8.32214805865307	-0.952139820888966	1.42148941280568	3.0401052365113	-1.76034766816374	3.90344916479221	-2.43219151580962	5.61500736130788	-1.52658642831124	-0.812471878234302	-1.82755040371541	-2.42536052789046	0.449091726759307	4.71735666888463	0.865280651356785	-1.19978877396974	1.25153139626785	1.37192118485431	-1.0632304036582	2.34475820011011	1.1195555939727	0.435610498352633	4.62327599168876	0.961882269130703	1.64061773628437	5.98945446620983	0.00994892488706981	-0.195539632672832
GTEx	GTEX-13FHO	GTEX-13FHO-1226-SM-5L3EF	SRR1379365		79762356	66.38468402	27.17726643	0	1	0	0	0	1	0	-3.21330151640966	16.464767211679	2.19323275233139	2.09622205735002	2.50572563516667	4.05189406520288	4.12640971348063	3.3186339408734	-1.73100250392731	0.759129757672406	-2.20604715101972	1.67478983426355	3.59723148221744	-2.61744427066387	-0.656247105917091	0.802560596220765	-0.646246770422949	0.0601257548686233	-0.51165888570923	0.934048892224074	-0.67198891665785	1.10667691864253	0.442121388428511	1.40027815625003	0.651240764862528	-0.3644173502063	-0.480360128662412	0.690879736300809	1.28394663650856	0.443718206179834	1.36180621933706	1.07449478168027	-1.40344197033314	-0.418716645871602	-1.66844012557996
GTEx	GTEX-13FTW	GTEX-13FTW-0926-SM-5J2NJ	SRR1380231		84231860	88.66449583	3.853150103	1	0	0	0	1	0	0	-17.7340608840483	-14.5911170860432	2.6401906829669	-7.44777730678918	-0.0689991212073211	-2.55759980117538	-6.49346392439671	1.87852908585337	-4.2121386543119	3.66273809958895	-8.1286767826351	3.32750530486723	-5.12420168728105	1.2387791963072	-1.24304241112934	2.09673782638004	-0.576852755240512	0.786117443986204	-0.0852894011980068	-0.702436823923802	-2.97320331329527	-2.90570665071531	-2.50588395542049	-1.38692611213009	1.16655138084402	-0.646143953953785	-2.52826112903108	0.720447586950036	1.00179552003792	0.568492791145838	-1.2640449884105	3.08628669487488	-1.65611256451482	-4.86040193124308	4.00593468227137
GTEx	GTEX-11DXY	GTEX-11DXY-1026-SM-5987V	SRR1380501		87064228	49.68535183	39.61153139	0	1	0	0	0	1	0	-3.22544353471029	17.0887031317089	0.992193810000006	3.05530260350717	1.61192840452283	-0.0409495461516679	0.672049362984334	2.59266911963906	1.16433754338876	2.42536149600715	-1.71968200081955	1.41513990687078	5.5122487376725	-2.57054125604382	-2.68497386894683	0.610516801882163	0.163419950502934	-0.877516572834146	0.264019088325697	0.684685521625114	1.15821123995015	-0.13305975780866	1.04064665781685	0.516089886282874	0.574510032839143	-1.31178242057402	0.440320717343071	-0.605531755069423	-1.24028229299288	2.51484488249547	2.55168349874112	-1.96702602471383	-1.01119162252908	-1.87997425763936	1.66069365829291
GTEx	GTEX-11ZVC	GTEX-11ZVC-0526-SM-5N9G1	SRR1380785		108598118	45.70646243	47.29431131	0	1	0	0	0	1	0	-5.2734394528281	11.9921021194918	4.13569138261963	-1.91674685521322	2.79172963186511	0.947193868944961	-7.06293460363717	-0.427100159583805	1.90030011603179	1.11736914508156	0.273793375106912	1.42031021860004	9.96578233227821	-4.92455853033973	-3.97769111866207	1.0670313249539	-0.809998921240706	-1.22177654530005	-1.36661900230525	2.21161898266252	-1.18810048316843	1.95339088616752	1.46416940934774	-0.692885319331856	0.654578293118033	-0.744421399407433	1.43856708696139	0.0353268405751086	-0.939375923304653	-0.519790238153007	-1.50334378537606	0.112891776210627	0.519536933195157	0.539785908023479	-0.430057698495817
GTEx	GTEX-QV44	GTEX-QV44-0626-SM-4R1KJ	SRR1380952		59098498	88.78210407	5.740826104	1	0	0	1	0	0	0	-16.5108228538642	-12.8673929609805	-10.7223700675855	11.0659290453706	0.409132009930182	-2.02638980507685	-3.09835745160813	6.71064349461435	-0.672645450598841	1.57205810567709	2.4959327144581	-0.474641693967692	1.39354583278439	0.103513205005816	-1.56035833173544	-4.46832865881626	-0.361488017163273	0.25774556404799	-0.429390740150682	1.54484552290417	-1.52337091082186	3.35168703738576	1.54025646408595	-1.74487877622876	0.386640760541753	0.764356460968113	2.98421178520004	1.85077374341747	-0.909208890731879	-1.27624660054369	-0.904013016646694	-0.654672606521452	-0.704066097888017	2.68894148521774	-2.71463452983257
GTEx	GTEX-13NZA	GTEX-13NZA-0826-SM-5K7WS	SRR1381211		83335840	62.71553992	28.10019795	0	1	0	0	0	1	0	-4.40120558446378	13.2956955755148	3.03006604125951	2.86679690930667	2.85853223410777	4.52382032639772	3.16403634506421	-1.36245084444977	1.3918938330633	1.82560914642486	-1.72115662102866	1.09321523972127	4.85651419977645	-3.47390002579069	-1.3591453152807	0.599707184399964	0.755373605922725	1.98156286524071	1.14523210929155	1.99788595567219	-0.964896225983119	2.08774004977758	0.328919804095865	-2.36331270233128	0.90489451100469	-1.5808750270492	-1.15586717499624	0.299182611103887	-0.141004966142607	1.08397471286867	1.71793408301828	0.388259048740493	-1.50113407196505	0.741523415515902	-0.208353601931438
GTEx	GTEX-132NY	GTEX-132NY-1426-SM-5J1MJ	SRR1381269		105038670	84.37445371	9.681883824	0	1	0	0	0	1	0	-3.23447230737823	13.6234575903804	9.44105316807723	-1.07723715311738	7.08988536787701	13.8468265227641	8.68632934464984	4.65075960915652	-2.18033954887939	-0.386351372236531	1.57700497325667	-0.10371509152069	-2.07627276253735	1.88976341435457	1.0689298840832	-4.20161691955043	-0.403319277363172	2.84829421657957	-9.88944301587444	2.79506060666282	-4.83294413046101	0.275267339293881	-4.1298932808003	-0.41054961909889	4.38773977215341	1.93345239956927	0.421561686804148	-1.85783306764423	2.82166584175595	0.932051714892186	0.912245699828695	-0.276148972880756	2.37144542771943	1.8415690639039	0.206128149153053
GTEx	GTEX-13OW6	GTEX-13OW6-1126-SM-5L3HL	SRR1381524		81048040	47.43687571	46.31756672	0	1	0	0	0	0	1	-1.96169145247172	18.3731696615304	-0.120542172249038	4.12474446040558	-2.46845936914079	-7.39647597334765	-2.47111318252748	-2.30830237212982	3.54923375508294	1.97687818082893	-0.657290632998353	1.66873860560262	3.95675468726252	-0.944481838400387	-3.20840870169435	-0.359613397275423	-0.179880113626939	-0.66957076884165	-0.442611185518035	1.87532335902338	0.101886612544086	0.976703916494854	-0.511678399438216	-1.4132799065972	0.0144466066987174	-0.711155345650861	-0.732419378828638	-1.85041204623389	0.958633809758873	-0.782037060832024	0.144849776021759	-2.18321917455975	-1.03426629937572	0.151943346588783	0.855256089390468
GTEx	GTEX-13VXT	GTEX-13VXT-1126-SM-5LU3A	SRR1381693		115681006	61.80747771	32.8775737	0	1	0	0	0	0	1	-1.02230222990188	22.2642095007315	0.024033835236008	3.14627375941691	-3.70260217974884	-9.32629859610022	-2.07656370472014	-2.21294817608834	1.98739590420096	-0.327605496419033	1.76459753404363	-1.21158581341907	-3.03755869684282	1.30215040059629	1.55396567476694	-0.175281766369105	-0.112748869288284	-0.238806639907798	-0.427628109163881	-0.090159948386322	-0.332197472972546	0.336954709423758	-0.254972205022816	0.679640444695119	-0.264736617771809	0.226610662972287	0.0461010770137886	-0.612727350940067	0.383885424411455	-0.786914047979032	-0.465587599032609	0.27403729683261	0.0144127877828535	0.529134103636755	-0.509355591813899
GTEx	GTEX-ZLWG	GTEX-ZLWG-0226-SM-4WWC6	SRR1381733		118483404	83.87415844	3.768016321	1	0	0	1	0	0	0	-25.7121104740114	-29.8960655264746	4.67373368528751	-22.9749793098463	-11.4791373703087	-18.8961949205499	20.058096603395	15.9126330596833	14.001999933094	-19.2791869353859	-2.92819578342454	4.57829501693883	2.24792216387654	-1.3789672292104	6.7174403410502	-7.71115491555891	1.16275380851873	1.43507268015465	7.05990893382881	-0.908903039702818	1.98063899721775	0.57287424383128	4.7801540687663	-2.4960775995253	2.0290685007718	2.65238328670423	-3.01798673843808	-4.67511139996166	-10.7034136323286	0.792439405109112	-2.65784265838543	-1.70442477663533	-0.765894957829369	2.9698810648816	0.218156786612011
GTEx	GTEX-Y8LW	GTEX-Y8LW-0426-SM-4VBQ6	SRR1381841		127184806	88.04046137	4.344561409	1	0	0	1	0	0	0	-18.7004816323489	-15.5877076025123	-4.46231365677918	3.28156127268525	-0.910492703676769	-0.234874759552937	-1.04524634959712	-6.40264466564783	-6.32643645436417	-5.95524869174342	-3.88885564262975	3.15739448557803	1.29377467079282	-1.19277162369871	3.67170429782826	-0.671149435227416	-0.750249815108254	-0.20039367055818	-0.771422730377308	0.38762951849618	4.51775436544972	-5.86112013558253	2.37787852981686	1.31464782681891	-2.31912194550998	1.44042208364075	-2.5602480430305	-0.100853509054873	1.02943671219271	-1.10315797587636	-3.54650545576753	-0.161800730918456	2.76183980233334	-1.97256915421081	1.09020045880738
GTEx	GTEX-11EMC	GTEX-11EMC-0726-SM-5EGJO	SRR1382508		102033050	50.42422039	43.28965174	0	1	0	0	0	0	1	-3.20952197530712	18.724945953751	1.09688317644143	2.41821096633167	-1.55369582238281	-5.4281616470881	-1.46491559513531	-0.758778137768608	2.53844561121051	1.37792332863275	0.57901933328443	1.68892202320237	4.31136795780612	-2.00615359873462	-2.46327270715189	-1.10194465710075	0.266803401711942	0.834976829591591	0.054237787136538	0.409467161953755	0.763670050998254	-3.44739445689768	1.64082261201523	-1.82397026276953	-0.146420194325348	5.24680858506645	-5.86370235064598	-4.13008810761871	-5.46539453213337	0.204976451922169	-0.172023039511372	0.31235390980726	2.22838608045726	2.30019908089008	-2.24168886265112
GTEx	GTEX-YEC4	GTEX-YEC4-0426-SM-4W1ZH	SRR1382591		148402924	86.52044754	5.94588015	1	0	0	0	1	0	0	-18.4254292464693	-13.4055906057208	0.910744037106945	-4.37894947557146	0.188276146251689	-0.0315263167712175	-8.39086361131246	0.478396228298983	-4.49838548659131	4.96999638100361	-6.47826356971006	2.59140311766455	-4.88643046605435	1.7364366627671	-4.45058162732998	4.36980141578251	0.142672929168464	2.13890270541582	2.785144129103	-2.17421958689146	-0.198504185666456	-3.48128807817207	-2.79201640069196	2.36177183857632	-2.66459411082605	-0.056264511288956	-2.58418739145289	1.3907403192815	4.10531358902268	-1.56856072482741	0.871511485524877	-0.80683717445232	0.2944122759205	-2.60404674704435	3.40700869139507
GTEx	GTEX-Y8E4	GTEX-Y8E4-1126-SM-5IFIA	SRR1383000		86659154	85.43411582	6.27516396	1	0	0	1	0	0	0	-18.87321066188	-16.874822589728	-6.94209580634786	4.40724166785731	-0.300792453684249	-3.07541055795606	-0.0357186276985385	5.82273774593961	-1.14024120538804	2.90281826551725	4.67215349209466	-1.17196762110516	3.94778332936557	2.75211466012124	-1.0262548837165	-4.09973858349972	5.11987179759912	-4.48118232322764	0.594867415290882	-1.5890942676673	-2.72996468725236	-3.03385640394385	6.01202230088178	-0.851697103531967	-1.56871709980365	4.77800064312009	-3.6293447228153	-0.952264900114532	-3.03734526469731	-3.03917604264871	-1.02948995189389	-4.10129377403721	-0.730553265096853	-3.58390446670352	0.641919738620693
GTEx	GTEX-ZEX8	GTEX-ZEX8-0426-SM-4WWEN	SRR1383125		112095746	64.21326997	28.69263567	0	1	0	0	0	0	1	-0.917149123986859	21.0396329001578	1.08284612769699	1.39962751770393	-3.32864371090425	-6.97388152593043	-0.343084881115533	-1.16134999654157	1.69478553859411	-0.337462997681485	2.67196991966543	-2.37630851874477	-4.16314103282379	1.68023933379676	0.329520091315179	-0.769596872463634	-0.13841459130824	-0.398733803634173	-0.611037953318088	-0.350123086424293	0.636397034146036	-1.67852294709748	0.145779355114259	-1.05895079027398	0.247060424226122	0.0970122617642093	0.633633885601515	0.330543229475345	-0.569721814995482	-0.595881073935405	-1.15755115914127	0.445350507818174	0.402615650756484	0.107963852028554	-0.44655194846547
GTEx	GTEX-131YS	GTEX-131YS-0826-SM-5PNYV	SRR1383937		129161966	74.94570499	19.71214034	0	1	0	0	0	1	0	-3.24281301023948	15.4979954670165	3.39700615232024	3.44731639185804	4.28090496213548	12.0225712257747	8.78311426534182	1.35334325530532	0.501324711144048	-1.4161209039966	1.46485083066091	-2.38183446424893	-2.86290173665101	0.68988989774466	-2.89555552629525	2.02577083996593	0.0462728356328304	-2.6190905020716	4.4526936215652	-2.18571966313807	-0.214229624631532	0.822942235468474	-2.46190982174259	-4.08523784060747	0.09238265377198	-1.18465507689632	-3.77470331941203	0.122925805971487	1.54995827422772	-1.50840107164494	-0.991329322151267	-0.46655903656318	-3.2770196874154	1.14502163552611	-1.92985707028091
GTEx	GTEX-13FTZ	GTEX-13FTZ-0126-SM-5K7V3	SRR1384258		90252794	88.11824707	2.147022728	1	0	0	1	0	0	0	-21.3824911077374	-23.8894251104954	-12.3126847809164	15.0467453333161	0.667210402202189	6.75979085170655	8.85414158679968	-5.4453114620258	7.99755043687728	1.80754606967734	5.15757602229455	-5.66332028474395	-3.14454180003497	-2.20869808382958	-6.38292289939759	12.7768674283688	-1.77850961999641	6.52868686528509	-4.57366849555619	2.79341158764603	0.588129641004742	-0.0633640358928832	3.87789116771166	5.95961345731665	-4.36374877010685	-3.2691485764149	1.06369602506165	-1.34340249493741	-0.820251471751429	-1.92835536998427	-0.436371363608597	0.400326399659664	0.573808116520954	-0.00740347929962768	2.56571931767452
GTEx	GTEX-11LCK	GTEX-11LCK-0826-SM-5PNYD	SRR1384805		108845174	64.34215081	31.50393788	0	1	0	0	0	1	0	-3.60168992222991	17.2798800958934	5.00843711771714	-2.28483611198039	4.17267918944637	5.91755254644159	2.14963788332417	9.3561744627706	-7.48189759780512	-0.347993365428438	-0.948539278013844	0.662741573036994	1.12595680110788	-1.88010048011604	4.04213695715638	2.82134264828885	-0.221939652685866	-0.583942649923336	0.421412035141925	-0.565842232045895	2.20495533344224	-1.68776882443684	1.04134421807802	5.00678608745781	-3.08637120608998	-0.416216265689839	1.79579371446276	0.905359864219905	-0.254514362273143	-1.80215035054299	0.262406417341195	2.62432010883817	-1.07921132387561	-1.2811068940614	-0.983917672698144
GTEx	GTEX-YECK	GTEX-YECK-1226-SM-4W21G	SRR1384827		147337744	49.8059316	42.04509335	0	1	0	0	0	1	0	-3.24177382493297	16.3608928404795	1.70071287642791	3.1615896965984	2.54966607660802	2.23976976168091	1.78598538491252	2.54333030184428	0.927871247004949	2.70147529162549	-2.91938355562285	2.51506401911527	6.44060067690757	-2.10770128239665	-2.79468282375216	0.255929385171386	0.485367261941219	-0.431469775736768	0.114636407153222	1.14996926179083	-0.0985428849088839	2.60124027052651	-0.606324227041283	-0.354956571938977	0.463683691951913	-1.10447079568318	-0.672135183338893	-1.69142719430908	0.572726534212549	0.652719813933962	0.721128558283757	-2.20014471479115	0.609564129334126	0.0531388714508689	0.562784065042703
GTEx	GTEX-11ZUS	GTEX-11ZUS-0326-SM-5EQ4W	SRR1384852		74557402	63.52192905	27.93246471	0	1	0	0	0	1	0	-3.08933677042465	17.4008281205131	3.35100715784274	1.70786301666817	4.63683463149143	5.5963830564497	2.55346376772506	7.81804124666558	-0.403885309997444	3.96668251616754	-0.197864990317829	0.291884930502063	3.11912322166916	-1.61074451910936	-0.7133041723032	0.075190383073032	0.149549893410783	0.524298244023731	0.148218255323709	1.14365230553828	3.35009165440593	1.59394386056847	-1.1658685632168	-0.687208084681723	0.429023946648251	-0.560631643285668	0.967879059251364	-1.13371298723856	-1.19943862632263	-1.13853345175735	-1.50013372052061	-0.644886833297236	1.52188186646282	0.570233979415454	2.40412710752585
GTEx	GTEX-14E6C	GTEX-14E6C-0326-SM-5Q5EE	SRR1384917		93928722	56.48410078	36.50279624	0	1	0	0	0	1	0	-4.14582443125031	15.3213619037768	2.67297585457396	0.653460279163729	1.95618505273587	2.06759905960821	-1.7913140457791	-0.711294833916648	-0.737615010225444	-1.13378946185819	-4.19776310081987	3.75729858513377	5.5372308857046	-3.28016018987387	0.416033691369631	1.08384402433779	-0.801851393989259	-2.41731793316373	-0.225647250065433	1.00040115785951	-0.87693510323033	1.43625982868595	2.56265176655038	1.6180624710317	-0.499587019856603	0.886013371516644	0.636659496292308	2.12655015803412	-0.282880692816932	0.336693627810825	1.52714002167581	1.3517404559827	-0.497994622983866	1.47275273668148	-0.995045930600983
GTEx	GTEX-ZAB5	GTEX-ZAB5-0226-SM-5CVMH	SRR1385235		103137914	62.0909242	28.88669825	0	1	0	0	0	0	1	-0.68478497607017	22.0804436293424	0.717181504947059	2.23092372628334	-3.34662633952948	-7.717025200671	-1.10859697356439	-0.739824003515049	2.51745921589376	0.880130180671636	4.41607322643831	-2.63547417044035	-4.4836471124858	1.23383436270157	1.35047424992472	-0.457441039009888	0.0225878891862775	0.740843249188666	-1.84488157086889	0.053438294711929	2.77553458375005	-4.33428278526402	-0.684613261219958	-3.67695227098608	0.492984504957078	0.462431585990927	0.984124077590054	0.539032577326268	-1.09893652577582	0.581970488890185	-0.712045780860245	1.18965410170697	-1.1152202092091	0.42793917784934	0.813604570719654
GTEx	GTEX-Y114	GTEX-Y114-0426-SM-4TT6V	SRR1385319		110596774	85.09585822	4.734080218	1	0	0	1	0	0	0	-18.7663406299033	-15.2230383644812	-5.56513728179985	5.5058735294659	-1.30244101341323	2.18988849950383	2.18351240815947	-9.07408141983796	-8.774877429686	-10.856578860232	-2.80200526484444	3.12685200053792	-1.92730216458368	4.219445724852	-12.4612818671686	3.32168954196416	1.17830388582995	3.30117510445577	3.22132126121674	-3.44862957629315	4.46058336838171	-0.510760160363054	-3.20628342928192	1.623279335609	1.30142767614216	-0.565937540195314	2.60341222924934	-1.60055298031091	-0.459838425634739	0.569530403490682	-2.54050680488137	2.12196381121449	-0.357913850061785	-2.61420405921688	-4.21297696736526
GTEx	GTEX-12WSI	GTEX-12WSI-0426-SM-5EQ5J	SRR1385364		92672438	38.22221662	52.18655627	0	1	0	0	0	1	0	-3.16476636290389	16.6795839902978	0.418476161307184	3.29740334071677	0.932035852648414	0.0807642521613275	0.901999262445312	0.728783233584706	1.44922642058368	2.29787072279863	-3.68198172497228	3.33310732247536	8.45885938012737	-3.43460364206938	-4.06365819298454	0.850725025129696	-0.229223027168203	-1.16275725067353	0.739458178291748	0.542797258441484	0.551535457233384	2.67688469342715	0.158630801655219	0.0509190900605403	0.720679769929977	-0.215551974955601	-0.170161651686227	-0.384056113976166	0.402301548033523	-0.178939706337039	-0.74351102501445	-0.48223526797426	-0.293980564380454	-1.85654433324717	1.55471728930014
[truncated: 436 more rows]
[truncated: 33 more columns]
