# Supplementary material for: In heart failure reactivation of RNA-binding proteins is associated with the expression of 1,523 fetal-specific isoforms
Source: PLoS Comput Biol. 2022 Feb 28;18(2):e1009918. doi: 10.1371/journal.pcbi.1009918 (PMC8912908; doi:10.1371/journal.pcbi.1009918)
Supplement: S8 Table — For each pairwise comparison between CVS tissues (columns A and B), the table shows the differences in the overlap with each eCLIP experiment [31] between the gene bodies of isoforms specific to one of the two tested CVS tissues and the gene bodies of isoforms that are not differentially expressed. Enrichments were performed using increasingly stringent thresholds for determining CVS tissue-specific isoforms, based on the log2 ratio between the mean isoform usage in the two tested CVS tissues. The table shows: 1) the two tested CVS tissues (columns A, B); the tested RBP, its associated eCLIP experiment and the cell line in which the eCLIP experiment was performed (columns C-E); the log2 ratio threshold (zero to six, 0.5 increments); and the results obtained from Fisher’s exact test (fisher.test function in R), including the estimate (odds ratio), the log2 of the estimate, and the p-value. Values displayed in this table were used to build Figs 3B and S8. (CSV) [file pcbi.1009918.s024.csv]

Tissue1	Tissue2	RBP	eCLIP experiment	eCLIP cell line	log2 ratio threshold	Estimate (Fisher's exact test)	log2 (estimate)	p-value (Fisher's exact test)
Arteria	Heart	CPEB4	CPEB4_K562	K562	1	1.25804410046427	0.331182496466749	0.428363314169877
Arteria	Heart	CPEB4	CPEB4_K562	K562	0.5	1.00765569342479	0.011002767565168	1
Arteria	Heart	CPEB4	CPEB4_K562	K562	3	0	-Inf	1
Arteria	Heart	CPEB4	CPEB4_K562	K562	1.5	1.18672572318295	0.246986536894535	0.644865756173402
Arteria	Heart	CPEB4	CPEB4_K562	K562	6	0	-Inf	1
Arteria	Heart	CPEB4	CPEB4_K562	K562	2.5	1.4550479090292	0.541066656213236	0.406198521170922
Arteria	Heart	CPEB4	CPEB4_K562	K562	2	1.10373906209701	0.14239914103425	0.754345370569713
Arteria	Heart	CPEB4	CPEB4_K562	K562	5.5	0	-Inf	1
Arteria	Heart	CPEB4	CPEB4_K562	K562	3.5	0	-Inf	1
Arteria	Heart	CPEB4	CPEB4_K562	K562	5	0	-Inf	1
Arteria	Heart	CPEB4	CPEB4_K562	K562	4	0	-Inf	1
Arteria	Heart	CPEB4	CPEB4_K562	K562	0	1.15613377015249	0.209308334145068	0.478355575952045
Arteria	Heart	CPEB4	CPEB4_K562	K562	4.5	0	-Inf	1
Arteria	Heart	EIF4G2	EIF4G2_K562	K562	2	0.703398183543216	-0.507586485537702	0.173581042450993
Arteria	Heart	EIF4G2	EIF4G2_K562	K562	3	1.00795381874443	0.0114295406288519	1
Arteria	Heart	EIF4G2	EIF4G2_K562	K562	1.5	0.92702332379975	-0.109322457539332	0.700095340642152
Arteria	Heart	EIF4G2	EIF4G2_K562	K562	4	0.522509850824944	-0.936469858454937	0.578845204032958
Arteria	Heart	EIF4G2	EIF4G2_K562	K562	2.5	0.733092941715427	-0.447931979677231	0.465612666096176
Arteria	Heart	EIF4G2	EIF4G2_K562	K562	5	0.537166967162111	-0.896557505268472	1
Arteria	Heart	EIF4G2	EIF4G2_K562	K562	4.5	0.402742658381912	-1.31206980468313	0.725560782316808
Arteria	Heart	EIF4G2	EIF4G2_K562	K562	6	1.61204601636755	0.688892926643625	0.498000161984702
Arteria	Heart	EIF4G2	EIF4G2_K562	K562	0	1.18983724234274	0.250764240991999	0.00955032438661792
Arteria	Heart	EIF4G2	EIF4G2_K562	K562	1	0.97021946128833	-0.0436169765558576	0.831480964323058
Arteria	Heart	EIF4G2	EIF4G2_K562	K562	0.5	0.950304370676854	-0.0735384301414698	0.545186262857791
Arteria	Heart	EIF4G2	EIF4G2_K562	K562	3.5	0.655825980404452	-0.60861503997213	0.519158106842816
Arteria	Heart	EIF4G2	EIF4G2_K562	K562	5.5	1.07454572666068	0.10372687710998	1
Arteria	Heart	EWSR1	EWSR1_K562	K562	3	1.05256788072111	0.0739132765428177	0.839166659490361
Arteria	Heart	EWSR1	EWSR1_K562	K562	1	0.955997753783086	-0.0649208664405537	0.729297628700421
Arteria	Heart	EWSR1	EWSR1_K562	K562	1.5	0.965543826367906	-0.0505863497988068	0.933508171314437
Arteria	Heart	EWSR1	EWSR1_K562	K562	6	1.95139970837375	0.964509317785869	0.436843292396818
Arteria	Heart	EWSR1	EWSR1_K562	K562	2	0.706569469682226	-0.501096682043784	0.213718865378857
Arteria	Heart	EWSR1	EWSR1_K562	K562	0.5	1.07175873615332	0.0999801769437442	0.431042287626328
Arteria	Heart	EWSR1	EWSR1_K562	K562	4.5	1.01884714377295	0.0269376221980994	1
Arteria	Heart	EWSR1	EWSR1_K562	K562	5.5	2.93047377022265	1.5511339242709	0.183114064072951
Arteria	Heart	EWSR1	EWSR1_K562	K562	5	1.37884294103722	0.46345813408818	0.657804231074291
Arteria	Heart	EWSR1	EWSR1_K562	K562	4	0.632678964662037	-0.660454465025207	0.766570026793617
Arteria	Heart	EWSR1	EWSR1_K562	K562	3.5	0.584239576436644	-0.775368005130113	0.483401665368393
Arteria	Heart	EWSR1	EWSR1_K562	K562	0	1.23772421195108	0.307689890986303	0.0036548145475509
Arteria	Heart	EWSR1	EWSR1_K562	K562	2.5	0.886658814294479	-0.173549031643464	0.874970095611314
Arteria	Heart	FMR1	FMR1_K562	K562	0	1.13835167414545	0.186946322291006	0.0689788127400162
Arteria	Heart	FMR1	FMR1_K562	K562	0.5	0.965657662255413	-0.0504162686637836	0.701563943559123
Arteria	Heart	FMR1	FMR1_K562	K562	1	0.79508635432027	-0.330816534887991	0.0632307751079013
Arteria	Heart	FMR1	FMR1_K562	K562	1.5	0.807377568764202	-0.308684589666894	0.25413039085245
Arteria	Heart	FMR1	FMR1_K562	K562	2	0.761025983061515	-0.39398238361049	0.319883938596479
Arteria	Heart	FMR1	FMR1_K562	K562	2.5	0.573674442604947	-0.801695848029445	0.16741187289162
Arteria	Heart	FMR1	FMR1_K562	K562	3	0.546848237830698	-0.870787585283473	0.320031666546281
Arteria	Heart	FMR1	FMR1_K562	K562	3.5	0.553995127729734	-0.852054806755608	0.486726106846649
Arteria	Heart	FMR1	FMR1_K562	K562	4	0.599932129941115	-0.737128796392465	0.768342733199311
Arteria	Heart	FMR1	FMR1_K562	K562	4.5	0.462328432472175	-1.113010006107	0.71784419617025
Arteria	Heart	FMR1	FMR1_K562	K562	5	0.616661041023972	-0.697450391261468	1
Arteria	Heart	FMR1	FMR1_K562	K562	5.5	1.23346995595638	0.302722575856432	0.578150649350591
Arteria	Heart	FMR1	FMR1_K562	K562	6	1.85045977472519	0.88788377468961	0.45345696687872
Arteria	Heart	FUBP3	FUBP3_HepG2	HepG2	0.5	0.947681208650671	-0.0775262636607893	0.685846756259675
Arteria	Heart	FUBP3	FUBP3_HepG2	HepG2	1	1.02306667775116	0.0329001749230517	0.878718165207317
Arteria	Heart	FUBP3	FUBP3_HepG2	HepG2	1.5	0.871544989190203	-0.19835295663353	0.658451932772268
Arteria	Heart	FUBP3	FUBP3_HepG2	HepG2	2.5	1.15497751794979	0.207864769340009	0.674581109247664
Arteria	Heart	FUBP3	FUBP3_HepG2	HepG2	3	1.39172707325479	0.476876317028746	0.417143975214062
Arteria	Heart	FUBP3	FUBP3_HepG2	HepG2	3.5	1.92312158644366	0.943449977765751	0.196374420806625
Arteria	Heart	FUBP3	FUBP3_HepG2	HepG2	2	0.908053981084753	-0.139150030930186	0.881397472745764
Arteria	Heart	FUBP3	FUBP3_HepG2	HepG2	4.5	0.927416213057718	-0.108711146810345	1
Arteria	Heart	FUBP3	FUBP3_HepG2	HepG2	5	1.23691595816543	0.306747480219774	0.566523679091413
Arteria	Heart	FUBP3	FUBP3_HepG2	HepG2	5.5	2.47404258691385	1.30687033434848	0.356010697703554
Arteria	Heart	FUBP3	FUBP3_HepG2	HepG2	4	1.85741871957456	0.893299079979287	0.235356130989062
Arteria	Heart	FUBP3	FUBP3_HepG2	HepG2	0	1.02539665921279	0.036182102491902	0.809549082914472
Arteria	Heart	FUBP3	FUBP3_HepG2	HepG2	6	3.71128529363931	1.89191890804118	0.265110333575457
Arteria	Heart	FUS	FUS_HepG2	HepG2	0	1.36205832932047	0.44578848721158	7.44670619976439e-08
Arteria	Heart	FUS	FUS_HepG2	HepG2	0.5	1.2185092048808	0.285117149531271	0.00334640064173148
Arteria	Heart	FUS	FUS_HepG2	HepG2	5.5	2.79180057079681	1.4811958878948	0.13818322739834
Arteria	Heart	FUS	FUS_HepG2	HepG2	1	1.21806060899508	0.284585921521052	0.0231450418070434
Arteria	Heart	FUS	FUS_HepG2	HepG2	1.5	1.08229021829709	0.114087412617419	0.55327249379486
Arteria	Heart	FUS	FUS_HepG2	HepG2	3	1.17710679896003	0.235245222109598	0.629223358406494
Arteria	Heart	FUS	FUS_HepG2	HepG2	6	1.08419229319771	0.116620656912746	1
Arteria	Heart	FUS	FUS_HepG2	HepG2	2	0.9602439051109	-0.0585271932194732	0.928808591984971
Arteria	Heart	FUS	FUS_HepG2	HepG2	2.5	1.32855493586634	0.409857884631808	0.212878537729905
Arteria	Heart	FUS	FUS_HepG2	HepG2	5	2.32586779087368	1.21776909213708	0.164077233696905
Arteria	Heart	FUS	FUS_HepG2	HepG2	4	1.68122735468378	0.749514835398371	0.231721704894497
Arteria	Heart	FUS	FUS_HepG2	HepG2	4.5	1.62771560869336	0.702848656748996	0.368913195825483
Arteria	Heart	FUS	FUS_HepG2	HepG2	3.5	1.3794074595763	0.464048673734624	0.349712102228952
Arteria	Heart	FUS	FUS_K562	K562	4.5	2.00324275537718	1.00233725927233	0.121545163936632
Arteria	Heart	FUS	FUS_K562	K562	2	0.948717790130779	-0.075949094393427	0.816566333655782
Arteria	Heart	FUS	FUS_K562	K562	0	1.25293666044897	0.325313484120361	6.35868327020731e-06
Arteria	Heart	FUS	FUS_K562	K562	3.5	1.57450377823737	0.654897219421737	0.109187240974182
Arteria	Heart	FUS	FUS_K562	K562	4	1.89321613465652	0.920839122397956	0.0674247608720503
Arteria	Heart	FUS	FUS_K562	K562	5	2.48228406216117	1.31166822087583	0.0717860069411279
Arteria	Heart	FUS	FUS_K562	K562	1	0.993020776070664	-0.0101041926215683	0.968538566644705
Arteria	Heart	FUS	FUS_K562	K562	6	3.18900098212071	1.67310454189888	0.132118236464481
Arteria	Heart	FUS	FUS_K562	K562	5.5	2.83563358397172	1.50367112187941	0.104706501970005
Arteria	Heart	FUS	FUS_K562	K562	2.5	1.14157782252826	0.191029212912221	0.51849794988675
Arteria	Heart	FUS	FUS_K562	K562	0.5	1.0596804888966	0.0836293340616152	0.338474677582088
Arteria	Heart	FUS	FUS_K562	K562	3	1.48955755219715	0.574883866229521	0.125504444599816
Arteria	Heart	FUS	FUS_K562	K562	1.5	1.01108438820034	0.0159034140137604	0.90920953609712
Arteria	Heart	FXR2	FXR2_HepG2	HepG2	0	1.11881856568177	0.161976099215255	0.237210800681808
Arteria	Heart	FXR2	FXR2_HepG2	HepG2	0.5	1.00249800949521	0.00359937214728923	1
Arteria	Heart	FXR2	FXR2_HepG2	HepG2	1	0.992019064437421	-0.0115602485644874	1
Arteria	Heart	FXR2	FXR2_HepG2	HepG2	1.5	1.03277484900806	0.0465257724762087	0.83105279934905
Arteria	Heart	FXR2	FXR2_HepG2	HepG2	2.5	1.40011321947313	0.485543494718806	0.311936237086409
Arteria	Heart	FXR2	FXR2_HepG2	HepG2	3	1.28717977014682	0.364213557356244	0.598114708079657
Arteria	Heart	FXR2	FXR2_HepG2	HepG2	3.5	1.77862801838435	0.830764817436829	0.217052532010769
Arteria	Heart	FXR2	FXR2_HepG2	HepG2	4	1.11190389020225	0.153032091010178	0.702263016669535
Arteria	Heart	FXR2	FXR2_HepG2	HepG2	4.5	0.856037898174313	-0.224253426417674	1
Arteria	Heart	FXR2	FXR2_HepG2	HepG2	5	1.14172349032497	0.1912132921724	0.59498471423444
Arteria	Heart	FXR2	FXR2_HepG2	HepG2	6	0	-Inf	1
Arteria	Heart	FXR2	FXR2_HepG2	HepG2	2	1.34869999079254	0.431569466202121	0.245341129486142
Arteria	Heart	FXR2	FXR2_HepG2	HepG2	5.5	0	-Inf	1
Arteria	Heart	FXR2	FXR2_K562	K562	1	0.75882005347827	-0.398170289264797	0.028631444784324
Arteria	Heart	FXR2	FXR2_K562	K562	0	1.18769781316524	0.24816781685881	0.0189646601851995
Arteria	Heart	FXR2	FXR2_K562	K562	0.5	0.903001256268263	-0.147200100081858	0.274350916736867
Arteria	Heart	FXR2	FXR2_K562	K562	2.5	0.884109247952441	-0.177703442758308	0.875035386134536
Arteria	Heart	FXR2	FXR2_K562	K562	1.5	0.878465005560104	-0.186943278557487	0.506083410406835
Arteria	Heart	FXR2	FXR2_K562	K562	2	0.898055202963466	-0.155123965518002	0.735690660444477
Arteria	Heart	FXR2	FXR2_K562	K562	6	8.76513205186926	3.1317758261978	0.0135191778212521
Arteria	Heart	FXR2	FXR2_K562	K562	5.5	5.00837709965086	2.3243431923253	0.0387571651538877
Arteria	Heart	FXR2	FXR2_K562	K562	5	3.11601185990563	1.63970072447611	0.0579042392518808
Arteria	Heart	FXR2	FXR2_K562	K562	3	1.04804478214286	0.0677003634355715	0.839648213671544
Arteria	Heart	FXR2	FXR2_K562	K562	3.5	1.2298432599184	0.298474459834821	0.635425078876474
Arteria	Heart	FXR2	FXR2_K562	K562	4.5	2.92467385976344	1.54827575388044	0.0430086954797435
Arteria	Heart	FXR2	FXR2_K562	K562	4	1.71852705472222	0.781172564195715	0.231634007087321
Arteria	Heart	HNRNPA1	HNRNPA1_HepG2	HepG2	5.5	0.728651903843795	-0.456698329080644	1
Arteria	Heart	HNRNPA1	HNRNPA1_HepG2	HepG2	1	1.16178395492197	0.216341810445085	0.030787641191535
Arteria	Heart	HNRNPA1	HNRNPA1_HepG2	HepG2	3.5	1.16722671107573	0.223084803700478	0.564094148877501
Arteria	Heart	HNRNPA1	HNRNPA1_HepG2	HepG2	4	1.00562988639763	0.00809943108122941	1
Arteria	Heart	HNRNPA1	HNRNPA1_HepG2	HepG2	5	0.777002833797994	-0.364008234608486	0.796308083230674
Arteria	Heart	HNRNPA1	HNRNPA1_HepG2	HepG2	6	0	-Inf	0.202372895142869
Arteria	Heart	HNRNPA1	HNRNPA1_HepG2	HepG2	0.5	1.11929728712316	0.16259326928634	0.0338697797975544
Arteria	Heart	HNRNPA1	HNRNPA1_HepG2	HepG2	3	1.28711799981862	0.364144322361581	0.31708436675511
Arteria	Heart	HNRNPA1	HNRNPA1_HepG2	HepG2	4.5	0.554750052524506	-0.850090195868697	0.360914594704678
Arteria	Heart	HNRNPA1	HNRNPA1_HepG2	HepG2	2.5	1.3133687036595	0.393271982696809	0.145764546408464
Arteria	Heart	HNRNPA1	HNRNPA1_HepG2	HepG2	1.5	1.06317270360747	0.0883759697759511	0.538734464346533
Arteria	Heart	HNRNPA1	HNRNPA1_HepG2	HepG2	0	1.29381161588472	0.371627570487975	9.2986178756103e-09
Arteria	Heart	HNRNPA1	HNRNPA1_HepG2	HepG2	2	1.06787959774454	0.0947489939084763	0.626880950819843
Arteria	Heart	HNRNPA1	HNRNPA1_K562	K562	2.5	1.10749980917524	0.147306450200652	0.622742070075087
Arteria	Heart	HNRNPA1	HNRNPA1_K562	K562	5	1.70011155731436	0.765629415718112	0.31430283680981
Arteria	Heart	HNRNPA1	HNRNPA1_K562	K562	5.5	1.59424686802482	0.672875046956075	0.634555021721053
Arteria	Heart	HNRNPA1	HNRNPA1_K562	K562	1.5	0.923980167973952	-0.114066208476206	0.601050455924759
Arteria	Heart	HNRNPA1	HNRNPA1_K562	K562	0.5	1.08000541888024	0.111038551066549	0.257143885458322
Arteria	Heart	HNRNPA1	HNRNPA1_K562	K562	2	1.06519186033832	0.0911133093517305	0.722886102081275
Arteria	Heart	HNRNPA1	HNRNPA1_K562	K562	4.5	1.59470145725806	0.673286363521906	0.373506004921468
Arteria	Heart	HNRNPA1	HNRNPA1_K562	K562	6	2.55116208118752	1.35115455958221	0.24351927441158
Arteria	Heart	HNRNPA1	HNRNPA1_K562	K562	0	1.34605935968469	0.428742032559256	1.92643569771883e-07
Arteria	Heart	HNRNPA1	HNRNPA1_K562	K562	1	0.998190378668017	-0.00261309679313336	1
Arteria	Heart	HNRNPA1	HNRNPA1_K562	K562	3	1.36851027498475	0.452606266718869	0.265524407758994
Arteria	Heart	HNRNPA1	HNRNPA1_K562	K562	3.5	1.50305921990987	0.587901851960322	0.197204313552443
Arteria	Heart	HNRNPA1	HNRNPA1_K562	K562	4	1.39619029041531	0.481495583617311	0.478083307400438
Arteria	Heart	HNRNPC	HNRNPC_HepG2	HepG2	0.5	1.02230298081498	0.0318228324200313	0.651094803971989
Arteria	Heart	HNRNPC	HNRNPC_HepG2	HepG2	0	1.2499737080588	0.321897749565675	2.14396443911871e-08
Arteria	Heart	HNRNPC	HNRNPC_HepG2	HepG2	2.5	1.02830062098972	0.0402620943067915	0.864310774312294
Arteria	Heart	HNRNPC	HNRNPC_HepG2	HepG2	3	1.25037121330436	0.322356469357837	0.320945665632761
Arteria	Heart	HNRNPC	HNRNPC_HepG2	HepG2	4.5	0.789760795618823	-0.340512341890473	0.686104545067187
Arteria	Heart	HNRNPC	HNRNPC_HepG2	HepG2	4	1.08574019941313	0.11867893016054	0.871061842074169
Arteria	Heart	HNRNPC	HNRNPC_HepG2	HepG2	5	1.02162877318417	0.0308710628329363	1
Arteria	Heart	HNRNPC	HNRNPC_HepG2	HepG2	5.5	1.40515680639189	0.490731134845442	0.750349186392805
Arteria	Heart	HNRNPC	HNRNPC_HepG2	HepG2	2	0.981288724320283	-0.0272504122046724	0.90216449869734
Arteria	Heart	HNRNPC	HNRNPC_HepG2	HepG2	6	1.05336764319001	0.0750090493147189	1
Arteria	Heart	HNRNPC	HNRNPC_HepG2	HepG2	1	1.08307434216024	0.115132272849201	0.209873786009068
Arteria	Heart	HNRNPC	HNRNPC_HepG2	HepG2	1.5	1.07530636356707	0.104747753981965	0.44025920918821
Arteria	Heart	HNRNPC	HNRNPC_HepG2	HepG2	3.5	1.05367985682043	0.0754365945500249	0.898133438561791
Arteria	Heart	HNRNPC	HNRNPC_K562	K562	0.5	0.957871054942013	-0.0620966361246228	0.465683437227927
Arteria	Heart	HNRNPC	HNRNPC_K562	K562	1.5	1.04653919862311	0.0656263494341123	0.669381200997411
Arteria	Heart	HNRNPC	HNRNPC_K562	K562	1	0.967184325889415	-0.0481372303094685	0.684606571884308
Arteria	Heart	HNRNPC	HNRNPC_K562	K562	2.5	0.655654683504596	-0.608991910476055	0.0688473380408623
Arteria	Heart	HNRNPC	HNRNPC_K562	K562	0	1.19523843396509	0.257298445140158	0.000145511648092044
Arteria	Heart	HNRNPC	HNRNPC_K562	K562	4	0.618719824604081	-0.69264183433199	0.340524128346358
Arteria	Heart	HNRNPC	HNRNPC_K562	K562	3	0.728639650701444	-0.456722589905667	0.299645212122556
Arteria	Heart	HNRNPC	HNRNPC_K562	K562	3.5	0.719666782513753	-0.47459902512544	0.367778481292142
Arteria	Heart	HNRNPC	HNRNPC_K562	K562	6	2.55455607888837	1.3530726068459	0.19753114545638
Arteria	Heart	HNRNPC	HNRNPC_K562	K562	4.5	0.648281550000033	-0.625307580278553	0.631853662777847
Arteria	Heart	HNRNPC	HNRNPC_K562	K562	2	0.92885356150018	-0.106476928581047	0.664100493427155
Arteria	Heart	HNRNPC	HNRNPC_K562	K562	5.5	1.45946443638662	0.545439056284668	0.704297018555762
Arteria	Heart	HNRNPC	HNRNPC_K562	K562	5	0.907916771593807	-0.139368042648971	1
Arteria	Heart	HNRNPK	HNRNPK_HepG2	HepG2	2	1.01974320805413	0.0282058981681838	0.880528488573128
Arteria	Heart	HNRNPK	HNRNPK_HepG2	HepG2	2.5	1.18322258058557	0.242721490162845	0.401718420584164
Arteria	Heart	HNRNPK	HNRNPK_HepG2	HepG2	3	1.04791234796589	0.0675180485133209	0.892396150282816
Arteria	Heart	HNRNPK	HNRNPK_HepG2	HepG2	4	1.7351604619147	0.795069084650335	0.112941106374351
Arteria	Heart	HNRNPK	HNRNPK_HepG2	HepG2	4.5	1.23060545781336	0.299368296109884	0.622378702638753
Arteria	Heart	HNRNPK	HNRNPK_HepG2	HepG2	5	1.39227839871278	0.47744772001093	0.567127317485284
Arteria	Heart	HNRNPK	HNRNPK_HepG2	HepG2	5.5	0.974883182698374	-0.0366987394493873	1
Arteria	Heart	HNRNPK	HNRNPK_HepG2	HepG2	3.5	1.0138006387081	0.0197739779576788	1
Arteria	Heart	HNRNPK	HNRNPK_HepG2	HepG2	0.5	1.20754022910668	0.272071253132211	0.000995968798385016
Arteria	Heart	HNRNPK	HNRNPK_HepG2	HepG2	1	1.15559956350059	0.208641564072585	0.0551556272456576
Arteria	Heart	HNRNPK	HNRNPK_HepG2	HepG2	1.5	0.958157039643672	-0.0616659652852103	0.738954691505986
Arteria	Heart	HNRNPK	HNRNPK_HepG2	HepG2	6	0.649710318940946	-0.622131476101821	1
Arteria	Heart	HNRNPK	HNRNPK_HepG2	HepG2	0	1.32697570430794	0.408141956544334	5.9255727521526e-09
Arteria	Heart	HNRNPK	HNRNPK_K562	K562	0	1.31205923195936	0.391832850844057	1.73906320650088e-05
Arteria	Heart	HNRNPK	HNRNPK_K562	K562	0.5	1.10447209945365	0.143356974611461	0.184754746601335
Arteria	Heart	HNRNPK	HNRNPK_K562	K562	2.5	0.553589797585813	-0.8531107398968	0.100766771374226
Arteria	Heart	HNRNPK	HNRNPK_K562	K562	3	0.736365479050591	-0.441506100423733	0.597557182326288
Arteria	Heart	HNRNPK	HNRNPK_K562	K562	3.5	0.864459361429019	-0.210129951080985	1
Arteria	Heart	HNRNPK	HNRNPK_K562	K562	4	0.938192110626241	-0.0920447258038989	1
Arteria	Heart	HNRNPK	HNRNPK_K562	K562	4.5	1.11949824361791	0.162852264746373	0.748383942733431
Arteria	Heart	HNRNPK	HNRNPK_K562	K562	5	0.965178898865038	-0.0511317197766506	1
Arteria	Heart	HNRNPK	HNRNPK_K562	K562	5.5	2.05129625642772	1.03653586666596	0.297799915382898
Arteria	Heart	HNRNPK	HNRNPK_K562	K562	6	3.28282068928497	1.71493595071985	0.171699942440332
Arteria	Heart	HNRNPK	HNRNPK_K562	K562	1	1.0833515726227	0.115501506814523	0.424514077745332
Arteria	Heart	HNRNPK	HNRNPK_K562	K562	1.5	0.839295116633197	-0.252749908250821	0.279187733993901
Arteria	Heart	HNRNPK	HNRNPK_K562	K562	2	0.7663709397141	-0.383885238830534	0.241908100603294
Arteria	Heart	HNRNPL	HNRNPL_HepG2	HepG2	4.5	0.721453104421646	-0.471022474553642	0.649480167131632
Arteria	Heart	HNRNPL	HNRNPL_HepG2	HepG2	5	1.03102546876742	0.044079971125632	1
Arteria	Heart	HNRNPL	HNRNPL_HepG2	HepG2	5.5	0.72195599413306	-0.470017192651438	1
Arteria	Heart	HNRNPL	HNRNPL_HepG2	HepG2	3	1.20578203421526	0.269969138932138	0.454563704457618
Arteria	Heart	HNRNPL	HNRNPL_HepG2	HepG2	4	1.28417527312819	0.360842124902297	0.465427517072596
Arteria	Heart	HNRNPL	HNRNPL_HepG2	HepG2	6	0.481158530371703	-1.05541578862694	0.685746409587824
Arteria	Heart	HNRNPL	HNRNPL_HepG2	HepG2	2.5	1.17641208188415	0.234393506053735	0.384579647037714
Arteria	Heart	HNRNPL	HNRNPL_HepG2	HepG2	3.5	1.06793048659706	0.0948177426195264	0.774344060633743
Arteria	Heart	HNRNPL	HNRNPL_HepG2	HepG2	1.5	1.14035553597497	0.189483692828517	0.199879106074617
Arteria	Heart	HNRNPL	HNRNPL_HepG2	HepG2	1	1.12829398181482	0.174143017069702	0.0825505213054417
Arteria	Heart	HNRNPL	HNRNPL_HepG2	HepG2	0.5	1.08234361086653	0.114158583264508	0.138802695814855
Arteria	Heart	HNRNPL	HNRNPL_HepG2	HepG2	2	1.08200458722375	0.113706615570389	0.578641494209574
Arteria	Heart	HNRNPL	HNRNPL_HepG2	HepG2	0	1.23503917202491	0.304556800830071	2.77956277439322e-06
Arteria	Heart	HNRNPL	HNRNPL_K562	K562	6	2.14987161378068	1.10425050739967	0.38477124750879
Arteria	Heart	HNRNPL	HNRNPL_K562	K562	2.5	0.937683484539962	-0.0928270723008784	0.846859978070649
Arteria	Heart	HNRNPL	HNRNPL_K562	K562	2	1.1320383310498	0.17892280894649	0.367928693916143
Arteria	Heart	HNRNPL	HNRNPL_K562	K562	4.5	0.904885302130603	-0.144193158530402	1
Arteria	Heart	HNRNPL	HNRNPL_K562	K562	5	1.02324564780282	0.0331525305419111	1
Arteria	Heart	HNRNPL	HNRNPL_K562	K562	5.5	1.22824215148846	0.296595020245169	0.725281289796811
Arteria	Heart	HNRNPL	HNRNPL_K562	K562	1.5	1.15885742197127	0.212703077760917	0.138500908932101
Arteria	Heart	HNRNPL	HNRNPL_K562	K562	0	1.2432183079366	0.314079654494408	1.22488553812082e-06
Arteria	Heart	HNRNPL	HNRNPL_K562	K562	3	1.19663604032826	0.258984419902135	0.456164038439177
Arteria	Heart	HNRNPL	HNRNPL_K562	K562	1	1.11406701142383	0.155836013774188	0.120362157662327
Arteria	Heart	HNRNPL	HNRNPL_K562	K562	4	1.12653940307848	0.171897775740888	0.71614566888534
Arteria	Heart	HNRNPL	HNRNPL_K562	K562	0.5	1.03510415611722	0.0497759444911651	0.519806707881531
Arteria	Heart	HNRNPL	HNRNPL_K562	K562	3.5	1.33527302429012	0.417134761026745	0.311892585837093
Arteria	Heart	HNRNPM	HNRNPM_HepG2	HepG2	3	1.69281866309292	0.759427438166643	0.0486368208430013
Arteria	Heart	HNRNPM	HNRNPM_HepG2	HepG2	5	1.45891311171077	0.544893963422539	0.520761200229201
Arteria	Heart	HNRNPM	HNRNPM_HepG2	HepG2	5.5	2.34509595131066	1.22964695286776	0.191933950703023
Arteria	Heart	HNRNPM	HNRNPM_HepG2	HepG2	1	1.05135225724505	0.0722461275631459	0.549868666668311
Arteria	Heart	HNRNPM	HNRNPM_HepG2	HepG2	1.5	1.06694596069106	0.0934871075425391	0.578026590832868
Arteria	Heart	HNRNPM	HNRNPM_HepG2	HepG2	3.5	1.29003924804841	0.367414958751982	0.386103977564043
Arteria	Heart	HNRNPM	HNRNPM_HepG2	HepG2	2	1.10552370866493	0.144729965006286	0.556937997490681
Arteria	Heart	HNRNPM	HNRNPM_HepG2	HepG2	6	0.910848617074579	-0.13471679667096	1
Arteria	Heart	HNRNPM	HNRNPM_HepG2	HepG2	0	1.2133998853968	0.279055080223799	0.000367369818881195
Arteria	Heart	HNRNPM	HNRNPM_HepG2	HepG2	0.5	1.01421542591099	0.0203641226408766	0.820287149614287
Arteria	Heart	HNRNPM	HNRNPM_HepG2	HepG2	4.5	1.04174876560666	0.0590073905571769	1
Arteria	Heart	HNRNPM	HNRNPM_HepG2	HepG2	4	1.41296944141673	0.498730264544273	0.374243648808831
Arteria	Heart	HNRNPM	HNRNPM_HepG2	HepG2	2.5	1.47396351150869	0.559700810445841	0.0781557257183297
Arteria	Heart	HNRNPM	HNRNPM_K562	K562	4.5	1.9957367588779	0.996921439258888	0.168050244229022
Arteria	Heart	HNRNPM	HNRNPM_K562	K562	2.5	0.991150343612988	-0.012824184262974	1
Arteria	Heart	HNRNPM	HNRNPM_K562	K562	1	1.05051759122971	0.07110032057105	0.558113508180107
Arteria	Heart	HNRNPM	HNRNPM_K562	K562	3	1.28510684859178	0.361888315469742	0.375143298749796
Arteria	Heart	HNRNPM	HNRNPM_K562	K562	5	2.3674925073333	1.24335985984352	0.109619127908715
Arteria	Heart	HNRNPM	HNRNPM_K562	K562	5.5	7.69388980160367	2.94371316628407	0.00219056570644469
Arteria	Heart	HNRNPM	HNRNPM_K562	K562	2	1.17588632499191	0.233748599037206	0.286969632276934
Arteria	Heart	HNRNPM	HNRNPM_K562	K562	0	1.31633580456643	0.396527575534227	1.95721635995379e-07
Arteria	Heart	HNRNPM	HNRNPM_K562	K562	0.5	1.05358347720022	0.0753046258511207	0.408956763224769
Arteria	Heart	HNRNPM	HNRNPM_K562	K562	3.5	1.46840780782629	0.554252690676709	0.228837163273037
Arteria	Heart	HNRNPM	HNRNPM_K562	K562	1.5	1.14957417006375	0.201099551163643	0.226237485272907
Arteria	Heart	HNRNPM	HNRNPM_K562	K562	4	1.53999376309085	0.622924508078538	0.274707695316994
Arteria	Heart	HNRNPM	HNRNPM_K562	K562	6	6.83113063490903	2.77212438179214	0.0164568673937427
Arteria	Heart	HNRNPU	HNRNPU_HepG2	HepG2	2	1.11402298270375	0.155778996314126	0.504879927885104
Arteria	Heart	HNRNPU	HNRNPU_HepG2	HepG2	6	0	-Inf	0.605397704586013
Arteria	Heart	HNRNPU	HNRNPU_HepG2	HepG2	3.5	1.13796678933022	0.186458454333654	0.727300506984051
Arteria	Heart	HNRNPU	HNRNPU_HepG2	HepG2	2.5	1.44485998775326	0.530929697043778	0.0810853001201794
Arteria	Heart	HNRNPU	HNRNPU_HepG2	HepG2	3	1.44789422060943	0.533956206719032	0.176328280634649
Arteria	Heart	HNRNPU	HNRNPU_HepG2	HepG2	4	1.1761685364904	0.234094802808191	0.659864380215209
Arteria	Heart	HNRNPU	HNRNPU_HepG2	HepG2	4.5	1.023840833898	0.0339914516718215	1
Arteria	Heart	HNRNPU	HNRNPU_HepG2	HepG2	5	1.43384253702012	0.519886597586836	0.524473929763471
Arteria	Heart	HNRNPU	HNRNPU_HepG2	HepG2	5.5	1.34456966516145	0.427144506403935	0.662103592489796
Arteria	Heart	HNRNPU	HNRNPU_HepG2	HepG2	0	1.28236784337209	0.358810154069485	3.88284851979826e-06
Arteria	Heart	HNRNPU	HNRNPU_HepG2	HepG2	0.5	1.16529919986994	0.220700425908331	0.0156153665537636
Arteria	Heart	HNRNPU	HNRNPU_HepG2	HepG2	1	1.26772317369304	0.34223974583858	0.00386520286492123
Arteria	Heart	HNRNPU	HNRNPU_HepG2	HepG2	1.5	1.11204666791618	0.153217333167978	0.388763679587597
Arteria	Heart	HNRNPU	HNRNPU_K562	K562	3.5	0.955454035795442	-0.065741624013252	1
Arteria	Heart	HNRNPU	HNRNPU_K562	K562	4	0.615644611144929	-0.699830318150337	0.29060689549521
Arteria	Heart	HNRNPU	HNRNPU_K562	K562	2.5	0.969118144137947	-0.0452555411437413	0.926277580545758
Arteria	Heart	HNRNPU	HNRNPU_K562	K562	5.5	0.596834756284219	-0.744596542439588	0.733184589415306
Arteria	Heart	HNRNPU	HNRNPU_K562	K562	0	1.29279962151351	0.370498680831781	2.23715108913735e-09
Arteria	Heart	HNRNPU	HNRNPU_K562	K562	5	0.852351798135355	-0.230479086184113	1
Arteria	Heart	HNRNPU	HNRNPU_K562	K562	1	1.0948530415825	0.130737234750094	0.175588588429075
Arteria	Heart	HNRNPU	HNRNPU_K562	K562	1.5	1.10955317230206	0.149978806406823	0.280970982351518
Arteria	Heart	HNRNPU	HNRNPU_K562	K562	6	0.397827569817336	-1.32978483515487	0.681623392674048
Arteria	Heart	HNRNPU	HNRNPU_K562	K562	2	0.920503776852286	-0.119504453882647	0.59483588549477
Arteria	Heart	HNRNPU	HNRNPU_K562	K562	3	0.995239665127272	-0.00688410987900036	1
Arteria	Heart	HNRNPU	HNRNPU_K562	K562	4.5	0.753726301734062	-0.407887357620209	0.663693267233909
Arteria	Heart	HNRNPU	HNRNPU_K562	K562	0.5	1.07958494008947	0.110476756862033	0.136002965953741
Arteria	Heart	IGF2BP1	IGF2BP1_HepG2	HepG2	5	0.317479138266641	-1.65526630019339	0.342767896148242
Arteria	Heart	IGF2BP1	IGF2BP1_HepG2	HepG2	0.5	1.02429802672444	0.0346355386984082	0.716335968412428
Arteria	Heart	IGF2BP1	IGF2BP1_HepG2	HepG2	6	0	-Inf	0.603692751454066
Arteria	Heart	IGF2BP1	IGF2BP1_HepG2	HepG2	1.5	1.07940532279152	0.110236706695925	0.528673187873769
Arteria	Heart	IGF2BP1	IGF2BP1_HepG2	HepG2	3	1.12881949221168	0.1748148054099	0.64678933618935
Arteria	Heart	IGF2BP1	IGF2BP1_HepG2	HepG2	4	0.840379812683633	-0.250886588386892	1
Arteria	Heart	IGF2BP1	IGF2BP1_HepG2	HepG2	5.5	0.635090722572497	-0.654965399606424	1
Arteria	Heart	IGF2BP1	IGF2BP1_HepG2	HepG2	0	1.18104875775172	0.240068525374018	0.00262109309274092
Arteria	Heart	IGF2BP1	IGF2BP1_HepG2	HepG2	1	1.11542091857839	0.157588232614685	0.207009058551547
Arteria	Heart	IGF2BP1	IGF2BP1_HepG2	HepG2	2	1.01357404003027	0.0194514793159039	0.932010803651367
Arteria	Heart	IGF2BP1	IGF2BP1_HepG2	HepG2	2.5	1.22674325340119	0.294833337180411	0.342746985266279
Arteria	Heart	IGF2BP1	IGF2BP1_HepG2	HepG2	3.5	0.831053559317587	-0.266986636818455	0.724975884507999
Arteria	Heart	IGF2BP1	IGF2BP1_HepG2	HepG2	4.5	0.238025084842625	-2.07081447147593	0.162235931602276
Arteria	Heart	IGF2BP1	IGF2BP1_K562	K562	3.5	1.19883809246858	0.261636830591099	0.563928010262503
Arteria	Heart	IGF2BP1	IGF2BP1_K562	K562	0	1.15133832034571	0.203311831180806	0.0183516685226619
Arteria	Heart	IGF2BP1	IGF2BP1_K562	K562	1.5	1.03008929460532	0.0427694046904696	0.837432443638277
Arteria	Heart	IGF2BP1	IGF2BP1_K562	K562	1	0.970168091050474	-0.0436933649941689	0.777274464956527
Arteria	Heart	IGF2BP1	IGF2BP1_K562	K562	2	0.959703034134495	-0.0593400405748995	0.926166621352199
Arteria	Heart	IGF2BP1	IGF2BP1_K562	K562	5.5	1.79237595006915	0.841873273787421	0.351362419725913
Arteria	Heart	IGF2BP1	IGF2BP1_K562	K562	4	1.05561387201309	0.0780822146182255	0.808315827445317
Arteria	Heart	IGF2BP1	IGF2BP1_K562	K562	5	0.843376465391733	-0.245751331435325	1
Arteria	Heart	IGF2BP1	IGF2BP1_K562	K562	6	2.86824856243069	1.52017005341483	0.207835684806463
Arteria	Heart	IGF2BP1	IGF2BP1_K562	K562	0.5	0.978643416071122	-0.0311448076599392	0.775155786935627
Arteria	Heart	IGF2BP1	IGF2BP1_K562	K562	3	1.30116165329362	0.379800210262721	0.403191714910705
Arteria	Heart	IGF2BP1	IGF2BP1_K562	K562	4.5	0.623140786957334	-0.682369944962811	0.761130471078623
Arteria	Heart	IGF2BP1	IGF2BP1_K562	K562	2.5	0.912128503847548	-0.13269100426527	0.897022703414029
Arteria	Heart	IGF2BP2	IGF2BP2_K562	K562	3.5	1.06190253610289	0.0866513582949704	0.85327983564813
Arteria	Heart	IGF2BP2	IGF2BP2_K562	K562	6	2.54891285374217	1.34988204906697	0.24380373400672
Arteria	Heart	IGF2BP2	IGF2BP2_K562	K562	2.5	0.749684950861322	-0.415643653039915	0.325330813526158
Arteria	Heart	IGF2BP2	IGF2BP2_K562	K562	2	0.76008208294042	-0.395772868098768	0.183393732088553
Arteria	Heart	IGF2BP2	IGF2BP2_K562	K562	4	0.728199964753916	-0.457593423933761	0.813472908587335
Arteria	Heart	IGF2BP2	IGF2BP2_K562	K562	3	1.04799724311953	0.0676349217007264	0.873364065954497
Arteria	Heart	IGF2BP2	IGF2BP2_K562	K562	5.5	1.59283920805487	0.671600638834374	0.634670179071094
Arteria	Heart	IGF2BP2	IGF2BP2_K562	K562	4.5	0.553762042060325	-0.852661928159994	0.566574775937396
Arteria	Heart	IGF2BP2	IGF2BP2_K562	K562	1.5	0.922285877495897	-0.116714088138705	0.601123020799727
Arteria	Heart	IGF2BP2	IGF2BP2_K562	K562	1	1.02433872373672	0.0346928581600319	0.786982539866548
Arteria	Heart	IGF2BP2	IGF2BP2_K562	K562	5	0.749459187567561	-0.416078177750965	1
Arteria	Heart	IGF2BP2	IGF2BP2_K562	K562	0.5	1.03605938716296	0.0511067010070191	0.608760058058149
Arteria	Heart	IGF2BP2	IGF2BP2_K562	K562	0	1.23274988864162	0.301880122515617	0.000217909120959657
Arteria	Heart	IGF2BP3	IGF2BP3_HepG2	HepG2	6	0.931437985894557	-0.102468375554742	1
Arteria	Heart	IGF2BP3	IGF2BP3_HepG2	HepG2	1.5	1.04955950937573	0.0697839688666347	0.707839168612672
Arteria	Heart	IGF2BP3	IGF2BP3_HepG2	HepG2	4	0.638434190622101	-0.6473901793545	0.505531209974701
Arteria	Heart	IGF2BP3	IGF2BP3_HepG2	HepG2	2	0.904432891035285	-0.144914636112096	0.612338814147524
Arteria	Heart	IGF2BP3	IGF2BP3_HepG2	HepG2	2.5	1.08359327257705	0.115823341795924	0.723427584881413
Arteria	Heart	IGF2BP3	IGF2BP3_HepG2	HepG2	5.5	1.39789516150113	0.483256166397223	0.654893936364245
Arteria	Heart	IGF2BP3	IGF2BP3_HepG2	HepG2	3.5	0.587430103861904	-0.767510893951494	0.288322525693233
Arteria	Heart	IGF2BP3	IGF2BP3_HepG2	HepG2	4.5	0.485977497079843	-1.04103858270844	0.413686423854512
Arteria	Heart	IGF2BP3	IGF2BP3_HepG2	HepG2	5	0.657725065652728	-0.604443443006665	0.756505964666868
Arteria	Heart	IGF2BP3	IGF2BP3_HepG2	HepG2	3	0.831142601491578	-0.266832069378103	0.650561482676064
Arteria	Heart	IGF2BP3	IGF2BP3_HepG2	HepG2	1	1.08549796712824	0.118357024141215	0.342505064556922
Arteria	Heart	IGF2BP3	IGF2BP3_HepG2	HepG2	0.5	1.04018036354138	0.056833708198764	0.554962421230941
Arteria	Heart	IGF2BP3	IGF2BP3_HepG2	HepG2	0	1.19269054675115	0.254219772639508	0.00122503772938883
Arteria	Heart	KHDRBS1	KHDRBS1_K562	K562	6	1.51259928525798	0.597029842319943	0.64176580463498
Arteria	Heart	KHDRBS1	KHDRBS1_K562	K562	4	0.976187745753099	-0.0347694534325502	1
Arteria	Heart	KHDRBS1	KHDRBS1_K562	K562	4.5	0.720138052851681	-0.473654592398132	0.804967654553985
Arteria	Heart	KHDRBS1	KHDRBS1_K562	K562	5	0.708722003479002	-0.496708254236042	0.780186866830205
Arteria	Heart	KHDRBS1	KHDRBS1_K562	K562	5.5	0.945153094114409	-0.0813800616057367	1
Arteria	Heart	KHDRBS1	KHDRBS1_K562	K562	1.5	1.00553411385555	0.00796202749643821	0.956167761915443
Arteria	Heart	KHDRBS1	KHDRBS1_K562	K562	2	1.03272268588646	0.046452903372674	0.823097864976406
Arteria	Heart	KHDRBS1	KHDRBS1_K562	K562	0	1.22431335788592	0.291972857057629	2.64997627036993e-05
Arteria	Heart	KHDRBS1	KHDRBS1_K562	K562	0.5	1.00617951234265	0.00888771912227502	0.908176585210839
Arteria	Heart	KHDRBS1	KHDRBS1_K562	K562	1	1.00074228446972	0.0010704928674134	1
Arteria	Heart	KHDRBS1	KHDRBS1_K562	K562	3.5	1.08069390890368	0.111957958189389	0.757419756301915
Arteria	Heart	KHDRBS1	KHDRBS1_K562	K562	2.5	0.806312511243891	-0.310588986855632	0.405096087013579
Arteria	Heart	KHDRBS1	KHDRBS1_K562	K562	3	0.944657258762808	-0.0821371102886137	1
Arteria	Heart	KHSRP	KHSRP_HepG2	HepG2	5	1.57996790788838	0.659895254857765	0.374430956962872
Arteria	Heart	KHSRP	KHSRP_HepG2	HepG2	0.5	1.04490934904855	0.0633777869464328	0.467219639242541
Arteria	Heart	KHSRP	KHSRP_HepG2	HepG2	2.5	1.29110956564166	0.368611435269933	0.229664065657308
Arteria	Heart	KHSRP	KHSRP_HepG2	HepG2	3	1.54990391218931	0.632178776980161	0.0905025979165213
Arteria	Heart	KHSRP	KHSRP_HepG2	HepG2	2	1.11113887485376	0.152039142147128	0.481664970920801
Arteria	Heart	KHSRP	KHSRP_HepG2	HepG2	3.5	1.63925755849161	0.713042547034102	0.100866976159809
Arteria	Heart	KHSRP	KHSRP_HepG2	HepG2	4	1.73986568579576	0.798975937156938	0.143956697225537
Arteria	Heart	KHSRP	KHSRP_HepG2	HepG2	6	1.7692171831632	0.823111159300341	0.619995997850336
Arteria	Heart	KHSRP	KHSRP_HepG2	HepG2	0	1.27889240417863	0.354894892454461	1.10874320513096e-06
Arteria	Heart	KHSRP	KHSRP_HepG2	HepG2	1	1.14753075895856	0.198532824839294	0.0791770066655847
Arteria	Heart	KHSRP	KHSRP_HepG2	HepG2	1.5	1.09339208703359	0.128810839787956	0.41929359392365
Arteria	Heart	KHSRP	KHSRP_HepG2	HepG2	5.5	1.89632871965579	0.923209070307398	0.405780310386509
Arteria	Heart	KHSRP	KHSRP_HepG2	HepG2	4.5	1.10563061221073	0.144869466093161	0.797464315759853
Arteria	Heart	KHSRP	KHSRP_K562	K562	1	0.949901313751693	-0.074150456766388	0.436896922044899
Arteria	Heart	KHSRP	KHSRP_K562	K562	1.5	0.97655617943539	-0.0342250528628822	0.814741173557015
Arteria	Heart	KHSRP	KHSRP_K562	K562	2	0.833629841792216	-0.262521171595503	0.181740532322952
Arteria	Heart	KHSRP	KHSRP_K562	K562	3.5	0.86005700102562	-0.21749581603562	0.691340672012186
Arteria	Heart	KHSRP	KHSRP_K562	K562	4.5	0.583886045714873	-0.776241262295271	0.297892961237134
Arteria	Heart	KHSRP	KHSRP_K562	K562	5	0.853764406655037	-0.228090076846958	0.815185589496742
Arteria	Heart	KHSRP	KHSRP_K562	K562	5.5	1.23352094905116	0.302782217328817	0.748167432411141
Arteria	Heart	KHSRP	KHSRP_K562	K562	2.5	0.673971877344013	-0.569239701199509	0.0412437712826141
Arteria	Heart	KHSRP	KHSRP_K562	K562	3	0.769759816710975	-0.377519733877505	0.305052850818055
Arteria	Heart	KHSRP	KHSRP_K562	K562	0.5	0.92821147333548	-0.107474564561009	0.133408821339902
Arteria	Heart	KHSRP	KHSRP_K562	K562	6	1.38747434313762	0.472461093718349	0.701977310541098
Arteria	Heart	KHSRP	KHSRP_K562	K562	0	1.16928258833886	0.225623637762369	0.000149760908142321
Arteria	Heart	KHSRP	KHSRP_K562	K562	4	0.637423785648249	-0.649675240195005	0.242778316825357
Arteria	Heart	PABPC4	PABPC4_K562	K562	3	1.30896712513658	0.388428864282389	0.471136897216683
Arteria	Heart	PABPC4	PABPC4_K562	K562	3.5	1.48550832856047	0.5709566937221	0.396025928918325
Arteria	Heart	PABPC4	PABPC4_K562	K562	2	1.04078049876575	0.0576658354643446	0.893886469895922
Arteria	Heart	PABPC4	PABPC4_K562	K562	5	3.23395833274025	1.69330109082881	0.0832339224608301
Arteria	Heart	PABPC4	PABPC4_K562	K562	1	0.928281129472423	-0.107366303894383	0.636692254342691
Arteria	Heart	PABPC4	PABPC4_K562	K562	1.5	1.15090054592527	0.202763169612923	0.433016990833575
Arteria	Heart	PABPC4	PABPC4_K562	K562	4	1.43549051121901	0.521543794172739	0.472934023741517
Arteria	Heart	PABPC4	PABPC4_K562	K562	2.5	0.756706799189117	-0.402193686743647	0.708587469579842
Arteria	Heart	PABPC4	PABPC4_K562	K562	5.5	1.91711561868582	0.938937346643384	0.431144820617418
Arteria	Heart	PABPC4	PABPC4_K562	K562	4.5	2.3514950197363	1.23357827669542	0.155764836060349
Arteria	Heart	PABPC4	PABPC4_K562	K562	0	1.1511403648409	0.203063759893422	0.0966873149253205
Arteria	Heart	PABPC4	PABPC4_K562	K562	0.5	1.05813181833368	0.0815193645126379	0.5757946552305
Arteria	Heart	PABPC4	PABPC4_K562	K562	6	2.87598124693749	1.5240542686011	0.326232064739285
Arteria	Heart	PABPN1	PABPN1_HepG2	HepG2	6	1.54765108276809	0.630080253201046	0.511485750989147
Arteria	Heart	PABPN1	PABPN1_HepG2	HepG2	3	1.10128794217619	0.139191724522731	0.713879846612906
Arteria	Heart	PABPN1	PABPN1_HepG2	HepG2	4	1.06050709740774	0.0847542760883506	0.788487602126296
Arteria	Heart	PABPN1	PABPN1_HepG2	HepG2	2.5	1.10066401995576	0.138374150358638	0.669305311835152
Arteria	Heart	PABPN1	PABPN1_HepG2	HepG2	0	1.56901526171291	0.649859385378312	1.05019520270686e-11
Arteria	Heart	PABPN1	PABPN1_HepG2	HepG2	0.5	1.24409052908585	0.315091470284574	0.00465004257704458
Arteria	Heart	PABPN1	PABPN1_HepG2	HepG2	4.5	1.2652860099049	0.339463533877915	0.730116977503176
Arteria	Heart	PABPN1	PABPN1_HepG2	HepG2	1.5	1.00144745986272	0.00208673329855719	1
Arteria	Heart	PABPN1	PABPN1_HepG2	HepG2	5	1.74028655151003	0.799324876421901	0.422888422003499
Arteria	Heart	PABPN1	PABPN1_HepG2	HepG2	3.5	1.16201231322092	0.216625356288608	0.668560518932535
Arteria	Heart	PABPN1	PABPN1_HepG2	HepG2	5.5	1.03159701685417	0.0448795062972282	1
Arteria	Heart	PABPN1	PABPN1_HepG2	HepG2	1	1.19645709499598	0.258768662696418	0.0750007541013029
Arteria	Heart	PABPN1	PABPN1_HepG2	HepG2	2	1.16796296510434	0.223994528578032	0.411728579112456
Arteria	Heart	PCBP1	PCBP1_HepG2	HepG2	1	0.759395647319965	-0.397076365100623	0.323337153737835
Arteria	Heart	PCBP1	PCBP1_HepG2	HepG2	5	2.63936158573886	1.40018900970844	0.327865199290185
Arteria	Heart	PCBP1	PCBP1_HepG2	HepG2	3.5	0.764161485623868	-0.388050548392767	1
Arteria	Heart	PCBP1	PCBP1_HepG2	HepG2	1.5	0.263429181594773	-1.92451292465308	0.0101752526188827
Arteria	Heart	PCBP1	PCBP1_HepG2	HepG2	6	0	-Inf	1
Arteria	Heart	PCBP1	PCBP1_HepG2	HepG2	4.5	1.979076612131	0.984827461704327	0.407117175401622
Arteria	Heart	PCBP1	PCBP1_HepG2	HepG2	0.5	0.952318181051292	-0.0704844189054636	0.804798117691669
Arteria	Heart	PCBP1	PCBP1_HepG2	HepG2	2	0.509705346315936	-0.972264609089557	0.386102072704067
Arteria	Heart	PCBP1	PCBP1_HepG2	HepG2	2.5	0.333855736708059	-1.58270326433399	0.374414340574334
Arteria	Heart	PCBP1	PCBP1_HepG2	HepG2	3	0.563018006073846	-0.828747032514281	1
Arteria	Heart	PCBP1	PCBP1_HepG2	HepG2	4	1.2487095282784	0.320437919820895	0.557696861531247
Arteria	Heart	PCBP1	PCBP1_HepG2	HepG2	5.5	0	-Inf	1
Arteria	Heart	PCBP1	PCBP1_HepG2	HepG2	0	1.24421771673021	0.315238954410987	0.114527920666845
Arteria	Heart	PCBP1	PCBP1_K562	K562	5.5	2.72704863261861	1.44734042867711	0.329772362804039
Arteria	Heart	PCBP1	PCBP1_K562	K562	0	1.18425579795008	0.243980735168919	0.097906472687547
Arteria	Heart	PCBP1	PCBP1_K562	K562	1	0.891038992973749	-0.166439527630687	0.523659432700536
Arteria	Heart	PCBP1	PCBP1_K562	K562	1.5	0.807772987849358	-0.307978192158267	0.487975368300898
Arteria	Heart	PCBP1	PCBP1_K562	K562	4.5	3.34483129657951	1.74193344742103	0.073440554000103
Arteria	Heart	PCBP1	PCBP1_K562	K562	3	1.5347986879366	0.618049436727723	0.388798443032192
Arteria	Heart	PCBP1	PCBP1_K562	K562	3.5	2.12077142717924	1.08458913824477	0.101055025703291
Arteria	Heart	PCBP1	PCBP1_K562	K562	2	0.903095359744889	-0.147049761923889	0.87642027522455
Arteria	Heart	PCBP1	PCBP1_K562	K562	4	2.80813849456053	1.48961408966259	0.0658611066508558
Arteria	Heart	PCBP1	PCBP1_K562	K562	0.5	0.906938178990108	-0.140923881403778	0.469766799732656
Arteria	Heart	PCBP1	PCBP1_K562	K562	2.5	0.89203399766474	-0.164829398948471	1
Arteria	Heart	PCBP1	PCBP1_K562	K562	5	4.60000837560445	2.2016364880027	0.0367610221812266
Arteria	Heart	PCBP1	PCBP1_K562	K562	6	4.09106096306016	2.03247503574692	0.244278008636873
Arteria	Heart	PCBP2	PCBP2_HepG2	HepG2	3.5	1.42041191020138	0.50630936256842	0.249015195914704
Arteria	Heart	PCBP2	PCBP2_HepG2	HepG2	5	1.21042325746548	0.275511613344549	0.764068786258406
Arteria	Heart	PCBP2	PCBP2_HepG2	HepG2	6	0.755895430573622	-0.403741426879346	1
Arteria	Heart	PCBP2	PCBP2_HepG2	HepG2	5.5	1.94562857606759	0.960236323372056	0.40081415974266
Arteria	Heart	PCBP2	PCBP2_HepG2	HepG2	4	1.78648916215801	0.83712716175508	0.140174688892809
Arteria	Heart	PCBP2	PCBP2_HepG2	HepG2	1	1.10471816102295	0.143678351917529	0.212549775365796
Arteria	Heart	PCBP2	PCBP2_HepG2	HepG2	2	1.08635687290091	0.119498112523906	0.581427401817002
Arteria	Heart	PCBP2	PCBP2_HepG2	HepG2	2.5	1.38001316048983	0.464682025324369	0.122976659696324
Arteria	Heart	PCBP2	PCBP2_HepG2	HepG2	4.5	1.1352095309165	0.1829586070448	0.794433523276363
Arteria	Heart	PCBP2	PCBP2_HepG2	HepG2	1.5	0.91957425158664	-0.120962024251371	0.521841064634771
Arteria	Heart	PCBP2	PCBP2_HepG2	HepG2	3	1.68961550147716	0.756694975960541	0.0458895292415829
Arteria	Heart	PCBP2	PCBP2_HepG2	HepG2	0	1.23008472307099	0.298757685763651	4.74460413331387e-05
Arteria	Heart	PCBP2	PCBP2_HepG2	HepG2	0.5	1.0979071092827	0.134755997288237	0.126873913127863
Arteria	Heart	PTBP1	PTBP1_HepG2	HepG2	3.5	1.47416670580684	0.559899680499152	0.194356212001554
Arteria	Heart	PTBP1	PTBP1_HepG2	HepG2	6	1.72858751311276	0.789593644698252	0.622666826266873
Arteria	Heart	PTBP1	PTBP1_HepG2	HepG2	3	1.42266629131722	0.508597294807494	0.163625849465119
Arteria	Heart	PTBP1	PTBP1_HepG2	HepG2	1.5	1.21485495981067	0.28078408234763	0.075993140596842
Arteria	Heart	PTBP1	PTBP1_HepG2	HepG2	4.5	1.36442592061767	0.448294067855922	0.450251352275905
Arteria	Heart	PTBP1	PTBP1_HepG2	HepG2	5	1.99491233390326	0.996325348842636	0.149664280980937
Arteria	Heart	PTBP1	PTBP1_HepG2	HepG2	0	1.295977779904	0.374040982808094	2.24937062854228e-07
Arteria	Heart	PTBP1	PTBP1_HepG2	HepG2	0.5	1.1328574269239	0.179966305630992	0.0357728222822509
Arteria	Heart	PTBP1	PTBP1_HepG2	HepG2	1	1.24122760915693	0.311767692819417	0.00496322482461103
Arteria	Heart	PTBP1	PTBP1_HepG2	HepG2	2	1.18524562375812	0.245186066260586	0.244867525299263
Arteria	Heart	PTBP1	PTBP1_HepG2	HepG2	2.5	1.47529831301304	0.561006704433534	0.0510582573938737
Arteria	Heart	PTBP1	PTBP1_HepG2	HepG2	4	1.49100813502231	0.576288129066243	0.302213973793106
Arteria	Heart	PTBP1	PTBP1_HepG2	HepG2	5.5	1.85280055106696	0.889707587531675	0.410657774691253
Arteria	Heart	PTBP1	PTBP1_K562	K562	3.5	1.64476073258805	0.717877726808377	0.159632801718208
Arteria	Heart	PTBP1	PTBP1_K562	K562	2	1.18378429122479	0.243406217510694	0.340893719120131
Arteria	Heart	PTBP1	PTBP1_K562	K562	3	1.66966805438664	0.739561309949862	0.0843078181666183
Arteria	Heart	PTBP1	PTBP1_K562	K562	1.5	1.07164939977546	0.0998329916759195	0.62256783213327
Arteria	Heart	PTBP1	PTBP1_K562	K562	1	0.986471212216619	-0.0196511448998279	0.922534198353723
Arteria	Heart	PTBP1	PTBP1_K562	K562	0.5	0.973881539986521	-0.0381817969817475	0.739327528350643
Arteria	Heart	PTBP1	PTBP1_K562	K562	5	1.45220437906479	0.538244508370595	0.472134720965322
Arteria	Heart	PTBP1	PTBP1_K562	K562	4	1.69857388776648	0.764323976648527	0.203783003708354
Arteria	Heart	PTBP1	PTBP1_K562	K562	2.5	1.12642271578847	0.171748333215092	0.596110842409017
Arteria	Heart	PTBP1	PTBP1_K562	K562	6	3.09903283515095	1.63181804077714	0.186460546643766
Arteria	Heart	PTBP1	PTBP1_K562	K562	5.5	1.93673845025304	0.953629136181369	0.319981673415184
Arteria	Heart	PTBP1	PTBP1_K562	K562	4.5	1.47624367021207	0.561930873696444	0.521597204285148
Arteria	Heart	PTBP1	PTBP1_K562	K562	0	1.16396662494045	0.2190496916455	0.0141367921837942
Arteria	Heart	PUM1	PUM1_K562	K562	5.5	3.35802839552824	1.74761442977303	0.14959010701478
Arteria	Heart	PUM1	PUM1_K562	K562	1.5	1.08190651206098	0.113575840742257	0.65841700572163
Arteria	Heart	PUM1	PUM1_K562	K562	6	5.37329868103178	2.42580803414906	0.0800263763849045
Arteria	Heart	PUM1	PUM1_K562	K562	0	1.3501899682656	0.433162405049142	0.000101539303986135
Arteria	Heart	PUM1	PUM1_K562	K562	1	1.00138988582378	0.00200378918862322	1
Arteria	Heart	PUM1	PUM1_K562	K562	3.5	1.96326148409902	0.973252336171203	0.0789788881867281
Arteria	Heart	PUM1	PUM1_K562	K562	2	0.979481765446122	-0.0299094601232622	1
Arteria	Heart	PUM1	PUM1_K562	K562	0.5	1.01839360456656	0.0262952643665529	0.85287891987299
Arteria	Heart	PUM1	PUM1_K562	K562	3	1.59795038983972	0.676222618877142	0.192921363571496
Arteria	Heart	PUM1	PUM1_K562	K562	4	1.53523085398962	0.618455611207238	0.344966412880401
Arteria	Heart	PUM1	PUM1_K562	K562	4.5	2.56134978938004	1.35690428727528	0.0912598296381817
Arteria	Heart	PUM1	PUM1_K562	K562	5	2.51813513891414	1.33235570919262	0.141369299688283
Arteria	Heart	PUM1	PUM1_K562	K562	2.5	1.13122052287553	0.177880199218734	0.618992954010391
Arteria	Heart	PUM2	PUM2_K562	K562	2.5	0.637497829575379	-0.649507664705935	0.451104021519302
Arteria	Heart	PUM2	PUM2_K562	K562	5	3.29986148558596	1.72240546742495	0.079595154651975
Arteria	Heart	PUM2	PUM2_K562	K562	4.5	2.39922097868815	1.26256604223969	0.149591279760717
Arteria	Heart	PUM2	PUM2_K562	K562	3.5	1.51584487751893	0.600122124297483	0.39077481126443
Arteria	Heart	PUM2	PUM2_K562	K562	3	1.09698102211925	0.133538567189354	0.807274925645337
Arteria	Heart	PUM2	PUM2_K562	K562	5.5	1.95616237434977	0.968026128442748	0.424885127806373
Arteria	Heart	PUM2	PUM2_K562	K562	2	0.781623407841846	-0.355454421501648	0.501222224349286
Arteria	Heart	PUM2	PUM2_K562	K562	0	1.11020433747566	0.150825234712226	0.225608551537039
Arteria	Heart	PUM2	PUM2_K562	K562	0.5	0.933116921493022	-0.0998702297914563	0.534238149803559
Arteria	Heart	PUM2	PUM2_K562	K562	4	1.46474894751037	0.550653413303354	0.466515356412584
Arteria	Heart	PUM2	PUM2_K562	K562	1	0.84686685830923	-0.239792923388381	0.27463017123347
Arteria	Heart	PUM2	PUM2_K562	K562	1.5	0.825518335651706	-0.276627835581642	0.428366813255321
Arteria	Heart	PUM2	PUM2_K562	K562	6	2.93458806359488	1.553158002375	0.321050967195302
Arteria	Heart	QKI	QKI_HepG2	HepG2	0.5	1.04241635395062	0.0599316229196723	0.513808085286862
Arteria	Heart	QKI	QKI_HepG2	HepG2	4	0.705093862659332	-0.50411277187316	0.669793167742717
Arteria	Heart	QKI	QKI_HepG2	HepG2	3.5	1.01599595127257	0.0228946530051332	1
Arteria	Heart	QKI	QKI_HepG2	HepG2	0	1.16376784923791	0.218803295225128	0.00358812507529135
Arteria	Heart	QKI	QKI_HepG2	HepG2	1	1.16004756762399	0.214183964118553	0.0655375603770362
Arteria	Heart	QKI	QKI_HepG2	HepG2	1.5	1.23543340967267	0.305017250954797	0.0660576493686696
Arteria	Heart	QKI	QKI_HepG2	HepG2	2	1.12773859907678	0.173432701141694	0.422489683370389
Arteria	Heart	QKI	QKI_HepG2	HepG2	2.5	1.02813323706606	0.0400272372933472	0.910779572913399
Arteria	Heart	QKI	QKI_HepG2	HepG2	3	0.947089022719285	-0.078428055044427	1
Arteria	Heart	QKI	QKI_HepG2	HepG2	5.5	1.19994744632305	0.262971222009297	0.686024625098217
Arteria	Heart	QKI	QKI_HepG2	HepG2	6	0.799637776646832	-0.322581465108884	1
Arteria	Heart	QKI	QKI_HepG2	HepG2	5	0.899800631383087	-0.152322715642186	1
Arteria	Heart	QKI	QKI_HepG2	HepG2	4.5	0.654163355859781	-0.612277148367994	0.6055694049765
Arteria	Heart	QKI	QKI_K652	K652	0	1.17156707144631	0.228439549910056	0.0665826339071923
Arteria	Heart	QKI	QKI_K652	K652	6	2.84187044981084	1.5068407890369	0.329324426870472
Arteria	Heart	QKI	QKI_K652	K652	4	1.42127227577496	0.507182960831314	0.476210222728228
Arteria	Heart	QKI	QKI_K652	K652	4.5	1.48174542701094	0.567297605041328	0.647260627513575
Arteria	Heart	QKI	QKI_K652	K652	5	2.00530619565619	1.00382254252919	0.284834773739514
Arteria	Heart	QKI	QKI_K652	K652	5.5	1.89439452178117	0.921736814093349	0.434871136781642
Arteria	Heart	QKI	QKI_K652	K652	0.5	1.10675190536973	0.146331857162994	0.306798148392862
Arteria	Heart	QKI	QKI_K652	K652	1	1.25796697196386	0.331094044626214	0.0690065169952111
Arteria	Heart	QKI	QKI_K652	K652	1.5	1.42091355364808	0.506818785744028	0.0500922492026875
Arteria	Heart	QKI	QKI_K652	K652	2	1.25009037186082	0.322032394345467	0.351998701657233
Arteria	Heart	QKI	QKI_K652	K652	2.5	0.882270411525481	-0.180707192420252	1
Arteria	Heart	QKI	QKI_K652	K652	3	1.29595266902614	0.374013028864359	0.474581157062056
Arteria	Heart	QKI	QKI_K652	K652	3.5	1.4707670535173	0.556568764371023	0.398835068436956
Arteria	Heart	RBFOX2	RBFOX2_HepG2	HepG2	3	1.25101303294139	0.323096819449355	0.410984762367551
Arteria	Heart	RBFOX2	RBFOX2_HepG2	HepG2	4	1.40043390413281	0.48587389456556	0.418384973398904
Arteria	Heart	RBFOX2	RBFOX2_HepG2	HepG2	0.5	1.15961377460903	0.213644375836981	0.0111700231484263
Arteria	Heart	RBFOX2	RBFOX2_HepG2	HepG2	5.5	1.73931100902358	0.798515926352381	0.42574650305757
Arteria	Heart	RBFOX2	RBFOX2_HepG2	HepG2	1	1.15322232813237	0.205670674978748	0.0622741634284028
Arteria	Heart	RBFOX2	RBFOX2_HepG2	HepG2	1.5	1.11275097810676	0.154130768917933	0.339355884472185
Arteria	Heart	RBFOX2	RBFOX2_HepG2	HepG2	2	1.13476755292667	0.182396804490304	0.402150382318532
Arteria	Heart	RBFOX2	RBFOX2_HepG2	HepG2	3.5	1.16045162975036	0.214686389141997	0.633891041819623
Arteria	Heart	RBFOX2	RBFOX2_HepG2	HepG2	5	1.08203833702449	0.113751615297163	0.779241837948101
Arteria	Heart	RBFOX2	RBFOX2_HepG2	HepG2	6	0.675765674060821	-0.565405025119523	1
Arteria	Heart	RBFOX2	RBFOX2_HepG2	HepG2	4.5	0.772602172525589	-0.372202360512592	0.803811826341891
Arteria	Heart	RBFOX2	RBFOX2_HepG2	HepG2	0	1.33797333064176	0.420049359526209	3.00826001636901e-09
Arteria	Heart	RBFOX2	RBFOX2_HepG2	HepG2	2.5	1.33283537589233	0.414498598093355	0.166775863229972
Arteria	Heart	RBFOX2	RBFOX2_K562	K562	3.5	1.26299777252657	0.33685209473298	0.417720672442628
Arteria	Heart	RBFOX2	RBFOX2_K562	K562	4.5	1.39363464083673	0.47885238980016	0.443219609945761
Arteria	Heart	RBFOX2	RBFOX2_K562	K562	2.5	0.852489339611255	-0.230246301555406	0.585473213400254
Arteria	Heart	RBFOX2	RBFOX2_K562	K562	5	1.57562527646653	0.655924466225809	0.375225913621598
Arteria	Heart	RBFOX2	RBFOX2_K562	K562	3	1.18745517261408	0.247873051575745	0.485174822242688
Arteria	Heart	RBFOX2	RBFOX2_K562	K562	6	1.7643568999414	0.819142423533996	0.620301917732381
Arteria	Heart	RBFOX2	RBFOX2_K562	K562	0.5	1.05720502171074	0.0802551828919479	0.363292859640015
Arteria	Heart	RBFOX2	RBFOX2_K562	K562	1.5	0.996760929673988	-0.00468057515132714	1
Arteria	Heart	RBFOX2	RBFOX2_K562	K562	2	0.985655705150864	-0.0208443014419078	1
Arteria	Heart	RBFOX2	RBFOX2_K562	K562	0	1.23531359675476	0.304877330920745	3.0056234499643e-05
Arteria	Heart	RBFOX2	RBFOX2_K562	K562	4	0.964852794662331	-0.0516192443308989	1
Arteria	Heart	RBFOX2	RBFOX2_K562	K562	1	0.984659116411743	-0.0223037369987158	0.873219187772819
Arteria	Heart	RBFOX2	RBFOX2_K562	K562	5.5	1.89112160512996	0.919242136147099	0.4063388504569
Arteria	Heart	RBM22	RBM22_K562	K562	5	3.27319782656044	1.71070079907466	0.0810416989532231
Arteria	Heart	RBM22	RBM22_K562	K562	2.5	1.181966666154	0.241189349176662	0.5750233083301
Arteria	Heart	RBM22	RBM22_K562	K562	5.5	7.48249516401752	2.90351944130103	0.0144219698668157
Arteria	Heart	RBM22	RBM22_K562	K562	4	1.99652842591035	0.997493612731269	0.159790211134242
Arteria	Heart	RBM22	RBM22_K562	K562	0.5	0.931966699314216	-0.101649688926853	0.532731431588924
Arteria	Heart	RBM22	RBM22_K562	K562	3.5	1.50662159406913	0.591317112415587	0.392297476824817
Arteria	Heart	RBM22	RBM22_K562	K562	0	1.12942932463057	0.175593995215145	0.174379036902243
Arteria	Heart	RBM22	RBM22_K562	K562	4.5	2.37976189054906	1.25081723046218	0.152050353700511
Arteria	Heart	RBM22	RBM22_K562	K562	3	1.32491417859717	0.405898912036428	0.46719797702579
Arteria	Heart	RBM22	RBM22_K562	K562	1	0.888426451598894	-0.170675747227098	0.451360141805986
Arteria	Heart	RBM22	RBM22_K562	K562	6	13.0909473481984	3.71049759897675	0.00475613639190374
Arteria	Heart	RBM22	RBM22_K562	K562	2	1.2067091354124	0.271077971480162	0.421303401120671
Arteria	Heart	RBM22	RBM22_K562	K562	1.5	1.09732391355739	0.13398945054047	0.62035217974306
Arteria	Heart	RBM5	RBM5_HepG2	HepG2	0.5	1.17070534434869	0.227378008598253	0.0386904198686518
Arteria	Heart	RBM5	RBM5_HepG2	HepG2	6	1.48098461854964	0.566556656928315	0.526189274790367
Arteria	Heart	RBM5	RBM5_HepG2	HepG2	5	2.37096940939634	1.24547704907175	0.118993368601291
Arteria	Heart	RBM5	RBM5_HepG2	HepG2	1	1.15859556403187	0.212377046420069	0.137231406840729
Arteria	Heart	RBM5	RBM5_HepG2	HepG2	3.5	1.29365424862496	0.371452083755067	0.526018436179075
Arteria	Heart	RBM5	RBM5_HepG2	HepG2	5.5	2.22351356616528	1.15284120692898	0.26841456327627
Arteria	Heart	RBM5	RBM5_HepG2	HepG2	2.5	1.5521487789326	0.63426685155906	0.0683439149543011
Arteria	Heart	RBM5	RBM5_HepG2	HepG2	3	1.46412477304698	0.550038505661354	0.207473247591954
Arteria	Heart	RBM5	RBM5_HepG2	HepG2	1.5	1.12246466480524	0.166670029632229	0.414746971550244
Arteria	Heart	RBM5	RBM5_HepG2	HepG2	4	1.30719851684944	0.386478251711919	0.589941234346781
Arteria	Heart	RBM5	RBM5_HepG2	HepG2	4.5	1.69308852440598	0.759657407600144	0.312366087490065
Arteria	Heart	RBM5	RBM5_HepG2	HepG2	0	1.23528029144593	0.304838433873254	0.00123024124415034
Arteria	Heart	RBM5	RBM5_HepG2	HepG2	2	1.06846616287628	0.095541220189053	0.688325851323758
Arteria	Heart	SFPQ	SFPQ_HepG2	HepG2	5.5	3.04309474436467	1.60553925172869	0.173276623512932
Arteria	Heart	SFPQ	SFPQ_HepG2	HepG2	0.5	1.1992537210841	0.262136915988227	0.0372855349399539
Arteria	Heart	SFPQ	SFPQ_HepG2	HepG2	3	2.83688794767055	1.50430916769631	0.000624570890984428
Arteria	Heart	SFPQ	SFPQ_HepG2	HepG2	1	1.46517305979185	0.551071079499261	0.000379314774151488
Arteria	Heart	SFPQ	SFPQ_HepG2	HepG2	5	3.24518822230758	1.69830215758178	0.0516630883662191
Arteria	Heart	SFPQ	SFPQ_HepG2	HepG2	6	0	-Inf	1
Arteria	Heart	SFPQ	SFPQ_HepG2	HepG2	0	1.25421990487759	0.326790320916836	0.00230028252070933
Arteria	Heart	SFPQ	SFPQ_HepG2	HepG2	2.5	2.37076564824786	1.24535305850921	0.000610506553946058
Arteria	Heart	SFPQ	SFPQ_HepG2	HepG2	3.5	2.58160577041093	1.36826870765624	0.00755538601552822
Arteria	Heart	SFPQ	SFPQ_HepG2	HepG2	1.5	1.5656539684168	0.64676539193156	0.00304568579765649
Arteria	Heart	SFPQ	SFPQ_HepG2	HepG2	2	1.75936331289171	0.815053433682143	0.00400821794767538
Arteria	Heart	SFPQ	SFPQ_HepG2	HepG2	4	2.6661611787876	1.41476399903482	0.0261762312712569
Arteria	Heart	SFPQ	SFPQ_HepG2	HepG2	4.5	2.31724000616186	1.21240747785284	0.118063013021252
Arteria	Heart	SRSF1	SRSF1_HepG2	HepG2	4.5	0.446843025419822	-1.16215998880806	0.23814604524056
Arteria	Heart	SRSF1	SRSF1_HepG2	HepG2	0	1.3224883788443	0.403255044942435	1.66292395086869e-09
Arteria	Heart	SRSF1	SRSF1_HepG2	HepG2	2	0.873683930403815	-0.194816639544067	0.390082457011646
Arteria	Heart	SRSF1	SRSF1_HepG2	HepG2	6	0	-Inf	0.365532386298733
Arteria	Heart	SRSF1	SRSF1_HepG2	HepG2	3	0.942803353445757	-0.0849712047857477	0.898045610959421
Arteria	Heart	SRSF1	SRSF1_HepG2	HepG2	1.5	0.933031224141745	-0.100002732823523	0.56056489775543
Arteria	Heart	SRSF1	SRSF1_HepG2	HepG2	1	1.07251512360751	0.100997991407541	0.342321276478913
Arteria	Heart	SRSF1	SRSF1_HepG2	HepG2	2.5	0.839357957987641	-0.252641891994415	0.484170643093589
Arteria	Heart	SRSF1	SRSF1_HepG2	HepG2	5.5	0.819690919283011	-0.286848079396307	1
Arteria	Heart	SRSF1	SRSF1_HepG2	HepG2	5	0.614630110649024	-0.702209648783146	0.591171803339323
Arteria	Heart	SRSF1	SRSF1_HepG2	HepG2	3.5	0.935693250041739	-0.0958924488138021	1
Arteria	Heart	SRSF1	SRSF1_HepG2	HepG2	0.5	1.08469395719255	0.117288048455601	0.141761401375352
Arteria	Heart	SRSF1	SRSF1_HepG2	HepG2	4	0.845391848648612	-0.242307893059133	0.849718261729313
Arteria	Heart	SRSF7	SRSF7_HepG2	HepG2	3	1.51685574712616	0.601083891912458	0.261889852415192
Arteria	Heart	SRSF7	SRSF7_HepG2	HepG2	4	1.66867377421249	0.738701935330619	0.314375748016534
Arteria	Heart	SRSF7	SRSF7_HepG2	HepG2	2.5	2.00357862159063	1.00257912307214	0.0140022698788529
Arteria	Heart	SRSF7	SRSF7_HepG2	HepG2	0	1.59700151252205	0.675365679128	4.61344172622169e-09
Arteria	Heart	SRSF7	SRSF7_HepG2	HepG2	5	1.7142941290812	0.777614660303337	0.347815882168625
Arteria	Heart	SRSF7	SRSF7_HepG2	HepG2	0.5	1.45134877749684	0.537394258963591	4.33758392174844e-05
Arteria	Heart	SRSF7	SRSF7_HepG2	HepG2	1	1.39987411337763	0.485297095619057	0.0044645363034328
Arteria	Heart	SRSF7	SRSF7_HepG2	HepG2	1.5	1.3102513194511	0.389843561801323	0.100895121076961
Arteria	Heart	SRSF7	SRSF7_HepG2	HepG2	2	1.51013677244197	0.594679219740988	0.0620803029682071
Arteria	Heart	SRSF7	SRSF7_HepG2	HepG2	6	0	-Inf	1
Arteria	Heart	SRSF7	SRSF7_HepG2	HepG2	3.5	1.25666146669599	0.329596053021513	0.601465262557881
Arteria	Heart	SRSF7	SRSF7_HepG2	HepG2	4.5	1.26672428012125	0.34110253632584	0.673591895862015
Arteria	Heart	SRSF7	SRSF7_HepG2	HepG2	5.5	3.64308887310081	1.86516219003482	0.132051680845934
Arteria	Heart	SRSF7	SRSF7_K562	K562	1.5	0.678934183546686	-0.558656369714957	0.029052925619767
Arteria	Heart	SRSF7	SRSF7_K562	K562	1	0.822240121940425	-0.28236832367608	0.0951264650780733
Arteria	Heart	SRSF7	SRSF7_K562	K562	0	1.28553317541524	0.362366841901994	0.000234455920605133
Arteria	Heart	SRSF7	SRSF7_K562	K562	0.5	0.973024510566911	-0.039451947817305	0.774092331278815
Arteria	Heart	SRSF7	SRSF7_K562	K562	4.5	0.412785360749646	-1.27653628776086	0.723416781935358
Arteria	Heart	SRSF7	SRSF7_K562	K562	5	0.550565790774493	-0.861013123554036	1
Arteria	Heart	SRSF7	SRSF7_K562	K562	2.5	0.590785397921165	-0.759293926548813	0.184513598845082
Arteria	Heart	SRSF7	SRSF7_K562	K562	3	0.619283369138705	-0.691328391901975	0.446065538561814
Arteria	Heart	SRSF7	SRSF7_K562	K562	4	0.535555601496336	-0.900891731230478	0.577468859010745
Arteria	Heart	SRSF7	SRSF7_K562	K562	5.5	0	-Inf	0.613981238680031
Arteria	Heart	SRSF7	SRSF7_K562	K562	6	0	-Inf	1
Arteria	Heart	SRSF7	SRSF7_K562	K562	2	0.518204415600963	-0.94840678616505	0.0147323322968302
Arteria	Heart	SRSF7	SRSF7_K562	K562	3.5	0.672239177926173	-0.572953469895818	0.658451133022055
Arteria	Heart	SRSF9	SRSF9_HepG2	HepG2	1.5	0.921054774840031	-0.118641139395633	0.619268759377408
Arteria	Heart	SRSF9	SRSF9_HepG2	HepG2	2	1.13794825640952	0.186434958419036	0.500150044458261
Arteria	Heart	SRSF9	SRSF9_HepG2	HepG2	6	0	-Inf	1
Arteria	Heart	SRSF9	SRSF9_HepG2	HepG2	1	1.25215804554202	0.324416668603972	0.0162378148797213
Arteria	Heart	SRSF9	SRSF9_HepG2	HepG2	0	1.38192231884845	0.466676520674136	2.03257689136785e-07
Arteria	Heart	SRSF9	SRSF9_HepG2	HepG2	4.5	0.329018415780475	-1.60375975830797	0.353164920488436
Arteria	Heart	SRSF9	SRSF9_HepG2	HepG2	3.5	0.990269618711008	-0.0141067165441809	1
Arteria	Heart	SRSF9	SRSF9_HepG2	HepG2	5	0.438838970778123	-1.18823644596521	0.715092173316774
Arteria	Heart	SRSF9	SRSF9_HepG2	HepG2	3	1.43496244379774	0.521012978813313	0.226297952068158
Arteria	Heart	SRSF9	SRSF9_HepG2	HepG2	0.5	1.24331268749843	0.314189173278711	0.00280409049780741
Arteria	Heart	SRSF9	SRSF9_HepG2	HepG2	2.5	1.38235490105228	0.467128055853629	0.179172072629207
Arteria	Heart	SRSF9	SRSF9_HepG2	HepG2	4	0.904143182973098	-0.145376834406328	1
Arteria	Heart	SRSF9	SRSF9_HepG2	HepG2	5.5	0	-Inf	0.615400193975906
Arteria	Heart	TAF15	TAF15_HepG2	HepG2	1.5	1.10890013356044	0.149129443673994	0.362306329759579
Arteria	Heart	TAF15	TAF15_HepG2	HepG2	0	1.2911916699734	0.368703176319078	3.16345379110316e-07
Arteria	Heart	TAF15	TAF15_HepG2	HepG2	2	1.18488500808905	0.244747053799034	0.2476506678618
Arteria	Heart	TAF15	TAF15_HepG2	HepG2	2.5	1.49865976758759	0.583672893407473	0.0407459853676811
Arteria	Heart	TAF15	TAF15_HepG2	HepG2	4.5	1.05786165265913	0.0811509638664606	0.803589724384006
Arteria	Heart	TAF15	TAF15_HepG2	HepG2	0.5	1.14479884069213	0.195094116198389	0.0215495023716299
Arteria	Heart	TAF15	TAF15_HepG2	HepG2	6	0	-Inf	0.359486936576112
Arteria	Heart	TAF15	TAF15_HepG2	HepG2	3.5	1.32425705689223	0.405183196697443	0.335969315534315
Arteria	Heart	TAF15	TAF15_HepG2	HepG2	4	1.27032414962287	0.3451966776141	0.539964650406775
Arteria	Heart	TAF15	TAF15_HepG2	HepG2	5.5	1.05853930677513	0.0820748419828852	1
Arteria	Heart	TAF15	TAF15_HepG2	HepG2	5	1.51173302214305	0.596203376570034	0.388322671666343
Arteria	Heart	TAF15	TAF15_HepG2	HepG2	1	1.16756106870569	0.223498011360808	0.0448841915691721
Arteria	Heart	TAF15	TAF15_HepG2	HepG2	3	1.39210582846317	0.4772688896317	0.211125914782755
Arteria	Heart	TAF15	TAF15_K562	K562	6	7.29473927976899	2.86685641590793	0.0213432288425834
Arteria	Heart	TAF15	TAF15_K562	K562	1.5	0.90383688372408	-0.145865663260091	0.589646009693622
Arteria	Heart	TAF15	TAF15_K562	K562	3.5	1.21802461847569	0.284543293009318	0.660759941465355
Arteria	Heart	TAF15	TAF15_K562	K562	5.5	6.49202431295534	2.69866840286099	0.0100321638769817
Arteria	Heart	TAF15	TAF15_K562	K562	0	1.14546093902591	0.195928262628238	0.0450242029439971
Arteria	Heart	TAF15	TAF15_K562	K562	2	0.869017886488113	-0.202542223391835	0.601757579624607
Arteria	Heart	TAF15	TAF15_K562	K562	2.5	0.982389761750858	-0.0256325695500278	1
Arteria	Heart	TAF15	TAF15_K562	K562	3	1.15451973536639	0.207292834759387	0.705902531705917
Arteria	Heart	TAF15	TAF15_K562	K562	4	1.43187000625053	0.51790052203617	0.406504028623638
Arteria	Heart	TAF15	TAF15_K562	K562	4.5	1.85434138125947	0.890906866246212	0.286192686467748
Arteria	Heart	TAF15	TAF15_K562	K562	5	2.59688509213861	1.3767821785641	0.0945133588069919
Arteria	Heart	TAF15	TAF15_K562	K562	0.5	1.0327065103049	0.0464303061988307	0.686202633761223
Arteria	Heart	TAF15	TAF15_K562	K562	1	0.982765771183004	-0.0250804840375963	0.915249500638945
Arteria	Heart	TARDBP	TARDBP_K562	K562	4.5	1.47497557246992	0.560691061750193	0.427864600891615
Arteria	Heart	TARDBP	TARDBP_K562	K562	5	2.15645789859751	1.10866355002673	0.127800034471072
Arteria	Heart	TARDBP	TARDBP_K562	K562	5.5	3.11546415781185	1.63944711936093	0.0830751912958134
Arteria	Heart	TARDBP	TARDBP_K562	K562	6	1.86718674066313	0.900866221273865	0.357842137530866
Arteria	Heart	TARDBP	TARDBP_K562	K562	4	1.40247470482246	0.487974750473074	0.397641669069649
Arteria	Heart	TARDBP	TARDBP_K562	K562	0	1.21438407136641	0.280224772684688	0.000152700845865268
Arteria	Heart	TARDBP	TARDBP_K562	K562	0.5	1.00631196800338	0.00907762613755994	0.926270731796692
Arteria	Heart	TARDBP	TARDBP_K562	K562	1	1.04958122061653	0.0698138122201423	0.54309392510153
Arteria	Heart	TARDBP	TARDBP_K562	K562	1.5	1.2611050490386	0.334688456010864	0.0396797381576537
Arteria	Heart	TARDBP	TARDBP_K562	K562	2	1.22974241400062	0.298356155433312	0.1757012195226
Arteria	Heart	TARDBP	TARDBP_K562	K562	2.5	1.25548863017138	0.328248963480274	0.267872398820301
Arteria	Heart	TARDBP	TARDBP_K562	K562	3	1.74087870941175	0.799815690969587	0.0308212380046492
Arteria	Heart	TARDBP	TARDBP_K562	K562	3.5	1.87434349848712	0.906385370367339	0.0300644206472536
Arteria	Heart	TIA1	TIA1_HepG2	HepG2	5.5	1.96368673369711	0.973564795340343	0.399157509359517
Arteria	Heart	TIA1	TIA1_HepG2	HepG2	2.5	1.12840594336887	0.174286169800939	0.581156481674227
Arteria	Heart	TIA1	TIA1_HepG2	HepG2	3	1.06370508485275	0.0890982151279172	0.77738377804534
Arteria	Heart	TIA1	TIA1_HepG2	HepG2	0	1.2353713792036	0.304944812168431	3.67665936733301e-05
Arteria	Heart	TIA1	TIA1_HepG2	HepG2	4.5	0.872238898879991	-0.197204763754845	1
Arteria	Heart	TIA1	TIA1_HepG2	HepG2	0.5	1.12783151087908	0.173551556588404	0.046737665441092
Arteria	Heart	TIA1	TIA1_HepG2	HepG2	1	1.16759365431242	0.223538275153846	0.0480491394063014
Arteria	Heart	TIA1	TIA1_HepG2	HepG2	1.5	0.999091250370455	-0.00131164465255785	1
Arteria	Heart	TIA1	TIA1_HepG2	HepG2	2	1.05042082975578	0.0709674301471481	0.75153708299416
Arteria	Heart	TIA1	TIA1_HepG2	HepG2	3.5	0.863717775866804	-0.211368113368382	0.868807883544822
Arteria	Heart	TIA1	TIA1_HepG2	HepG2	4	1.00184444027863	0.00265851386115744	1
Arteria	Heart	TIA1	TIA1_HepG2	HepG2	5	1.2215232137401	0.288681280739424	0.763165233432646
Arteria	Heart	TIA1	TIA1_HepG2	HepG2	6	1.83186562725141	0.873313681378137	0.616366815008803
Arteria	Heart	TIA1	TIA1_K562	K562	6	3.72244416759385	1.89625021019366	0.084041236756954
Arteria	Heart	TIA1	TIA1_K562	K562	1.5	0.960568901594853	-0.0580389927883399	0.722231805149482
Arteria	Heart	TIA1	TIA1_K562	K562	0.5	0.979581455497543	-0.0297626324544076	0.709279056695255
Arteria	Heart	TIA1	TIA1_K562	K562	3	1.23254469884578	0.30163996760424	0.387261279563273
Arteria	Heart	TIA1	TIA1_K562	K562	3.5	1.2067939149733	0.271179327102745	0.476138880423908
Arteria	Heart	TIA1	TIA1_K562	K562	5	1.62870539671097	0.703725670075062	0.302706294567815
Arteria	Heart	TIA1	TIA1_K562	K562	1	1.03659031780122	0.0518458235068713	0.598801174737879
Arteria	Heart	TIA1	TIA1_K562	K562	0	1.19836913033626	0.261072365955034	4.99482963929884e-05
Arteria	Heart	TIA1	TIA1_K562	K562	4	1.09727990418942	0.133931588527821	0.855516818190327
Arteria	Heart	TIA1	TIA1_K562	K562	2.5	0.949102724500975	-0.0753638515737988	0.848080238986504
Arteria	Heart	TIA1	TIA1_K562	K562	2	0.894505249185452	-0.160838146482062	0.449675671739922
Arteria	Heart	TIA1	TIA1_K562	K562	4.5	1.31409427408166	0.394068779367466	0.501272073397578
Arteria	Heart	TIA1	TIA1_K562	K562	5.5	2.79265750431734	1.48163865019456	0.141928982145544
Arteria	Heart	TRA2A	TRA2A_HepG2	HepG2	3	1.55921046185728	0.640815675812969	0.335888443908568
Arteria	Heart	TRA2A	TRA2A_HepG2	HepG2	6	0	-Inf	1
Arteria	Heart	TRA2A	TRA2A_HepG2	HepG2	0	1.20489034999961	0.268901861219044	0.114757135158985
Arteria	Heart	TRA2A	TRA2A_HepG2	HepG2	0.5	1.08365430207892	0.115904594127914	0.538059622270746
Arteria	Heart	TRA2A	TRA2A_HepG2	HepG2	1	0.895542938133088	-0.159165488866427	0.652875383936005
Arteria	Heart	TRA2A	TRA2A_HepG2	HepG2	1.5	0.989657689710025	-0.0149984936911996	1
Arteria	Heart	TRA2A	TRA2A_HepG2	HepG2	2	1.051066142023	0.0718534588016144	0.85954774181108
Arteria	Heart	TRA2A	TRA2A_HepG2	HepG2	3.5	1.57606908171493	0.656330771890294	0.445745804294523
Arteria	Heart	TRA2A	TRA2A_HepG2	HepG2	4	1.70066457607872	0.766098624748404	0.340278360425701
Arteria	Heart	TRA2A	TRA2A_HepG2	HepG2	4.5	1.30784262379317	0.387188947920769	0.544165511351725
Arteria	Heart	TRA2A	TRA2A_HepG2	HepG2	2.5	1.64671146112853	0.71958778635338	0.211994210547514
Arteria	Heart	TRA2A	TRA2A_HepG2	HepG2	5	1.74427213791438	0.802625144123239	0.449580868658518
Arteria	Heart	TRA2A	TRA2A_HepG2	HepG2	5.5	0	-Inf	1
Arteria	Heart	TRA2A	TRA2A_K562	K562	1.5	0.812467990584402	-0.299617119686383	0.344420730383875
Arteria	Heart	TRA2A	TRA2A_K562	K562	2.5	1.06601912215338	0.0922333172607087	0.857483251343137
Arteria	Heart	TRA2A	TRA2A_K562	K562	3	1.64151577954181	0.715028618297921	0.168330106710899
Arteria	Heart	TRA2A	TRA2A_K562	K562	4.5	2.14839215261568	1.10325735691556	0.185854610156873
Arteria	Heart	TRA2A	TRA2A_K562	K562	5	2.95486059155957	1.56309006657538	0.101307971118761
Arteria	Heart	TRA2A	TRA2A_K562	K562	1	0.973904807866565	-0.0381473286683303	0.895929026542613
Arteria	Heart	TRA2A	TRA2A_K562	K562	5.5	1.75160168404951	0.808674741960012	0.45975191916473
Arteria	Heart	TRA2A	TRA2A_K562	K562	6	2.62770227922156	1.39380182641283	0.350131836083134
Arteria	Heart	TRA2A	TRA2A_K562	K562	2	0.953210561553999	-0.0691331582383591	1
Arteria	Heart	TRA2A	TRA2A_K562	K562	3.5	1.97495914321046	0.981822807974627	0.101383589891595
Arteria	Heart	TRA2A	TRA2A_K562	K562	4	1.31158892690094	0.391315626931649	0.505197022146955
Arteria	Heart	TRA2A	TRA2A_K562	K562	0.5	1.03756278162189	0.0531986347672459	0.727836681417489
Arteria	Heart	TRA2A	TRA2A_K562	K562	0	1.19270242952197	0.25423414613244	0.0366692469868954
Arteria	Heart	U2AF2	U2AF2_HepG2	HepG2	3.5	1.71581108551185	0.778890717756686	0.0624351218680064
Arteria	Heart	U2AF2	U2AF2_HepG2	HepG2	6	0.613705343471951	-0.704381949953695	1
Arteria	Heart	U2AF2	U2AF2_HepG2	HepG2	0	1.24539177948139	0.316599661491328	4.47738818231214e-06
Arteria	Heart	U2AF2	U2AF2_HepG2	HepG2	4.5	1.16240194446557	0.217109021425171	0.806515872989629
Arteria	Heart	U2AF2	U2AF2_HepG2	HepG2	1	1.01267965249825	0.0181778692584457	0.87992579792487
Arteria	Heart	U2AF2	U2AF2_HepG2	HepG2	1.5	0.879715741347783	-0.184890667498123	0.274419830883648
Arteria	Heart	U2AF2	U2AF2_HepG2	HepG2	2	0.899043890560705	-0.153536546279326	0.553608952630303
Arteria	Heart	U2AF2	U2AF2_HepG2	HepG2	2.5	0.985110957629624	-0.0216418637127624	1
Arteria	Heart	U2AF2	U2AF2_HepG2	HepG2	3	1.28697052965459	0.363979017654988	0.290931966675283
Arteria	Heart	U2AF2	U2AF2_HepG2	HepG2	4	1.84353337869171	0.88247353785134	0.0777393420609126
Arteria	Heart	U2AF2	U2AF2_HepG2	HepG2	5	1.31508341872775	0.395154315842898	0.578247236405821
Arteria	Heart	U2AF2	U2AF2_HepG2	HepG2	5.5	0.920843222168466	-0.118972543188886	1
Arteria	Heart	U2AF2	U2AF2_HepG2	HepG2	0.5	1.05674461928083	0.0796267664906559	0.329685717084764
Arteria	Heart	U2AF2	U2AF2_K562	K562	1	0.963371317584482	-0.0538361236245286	0.653555106213843
Arteria	Heart	U2AF2	U2AF2_K562	K562	4	0.646318608816644	-0.629682564572768	0.437547513610607
Arteria	Heart	U2AF2	U2AF2_K562	K562	2.5	0.758765113189633	-0.398274747431281	0.26032497195493
Arteria	Heart	U2AF2	U2AF2_K562	K562	1.5	0.827439574176749	-0.273274135497526	0.104213191571564
Arteria	Heart	U2AF2	U2AF2_K562	K562	2	0.752074390897342	-0.411052722784184	0.0781438478120565
Arteria	Heart	U2AF2	U2AF2_K562	K562	6	1.42411567757349	0.510066337795533	0.652393882823479
Arteria	Heart	U2AF2	U2AF2_K562	K562	0.5	1.0348512858866	0.0494234590007859	0.551071389748223
Arteria	Heart	U2AF2	U2AF2_K562	K562	4.5	0.889293338212138	-0.16926871657554	1
Arteria	Heart	U2AF2	U2AF2_K562	K562	5	1.27087536672646	0.345822553850232	0.586663247359232
Arteria	Heart	U2AF2	U2AF2_K562	K562	3	0.889176520846273	-0.169458241108449	0.792273875275105
Arteria	Heart	U2AF2	U2AF2_K562	K562	5.5	0.88988345643777	-0.168311688953061	1
Arteria	Heart	U2AF2	U2AF2_K562	K562	3.5	1.01663856260965	0.0238068605011565	1
Arteria	Heart	U2AF2	U2AF2_K562	K562	0	1.25590672235414	0.328729317577971	1.43472985903492e-06
Arteria	iPSC-CVPC	CPEB4	CPEB4_K562	K562	5	1.63745085727706	0.711451609534637	0.279379067578454
Arteria	iPSC-CVPC	CPEB4	CPEB4_K562	K562	5.5	2.04591064990219	1.03274314031404	0.129642476746704
Arteria	iPSC-CVPC	CPEB4	CPEB4_K562	K562	1.5	0.947251742374873	-0.0781802064576518	0.825293195364959
Arteria	iPSC-CVPC	CPEB4	CPEB4_K562	K562	0	1.39007619117615	0.475163960372892	0.164412744444191
Arteria	iPSC-CVPC	CPEB4	CPEB4_K562	K562	4.5	1.22702619074157	0.29516604349936	0.637244461372446
Arteria	iPSC-CVPC	CPEB4	CPEB4_K562	K562	0.5	1.26135675289963	0.334976374672714	0.325867735275707
Arteria	iPSC-CVPC	CPEB4	CPEB4_K562	K562	3	1.17436437112951	0.231880104241911	0.545150498364712
Arteria	iPSC-CVPC	CPEB4	CPEB4_K562	K562	6	1.68520827285531	0.752926903363884	0.309853824042169
Arteria	iPSC-CVPC	CPEB4	CPEB4_K562	K562	1	0.918813886678999	-0.122155433544262	0.744276614178332
Arteria	iPSC-CVPC	CPEB4	CPEB4_K562	K562	2	1.0999299261834	0.137411616142752	0.720922467115578
Arteria	iPSC-CVPC	CPEB4	CPEB4_K562	K562	2.5	1.21747677371085	0.283894249702441	0.429260125201919
Arteria	iPSC-CVPC	CPEB4	CPEB4_K562	K562	4	1.22164277155816	0.288822479063557	0.541983243280271
Arteria	iPSC-CVPC	CPEB4	CPEB4_K562	K562	3.5	1.47799866252084	0.563644963952657	0.216831091193171
Arteria	iPSC-CVPC	EIF4G2	EIF4G2_K562	K562	4	1.14077067675829	0.19000880323463	0.304161808331914
Arteria	iPSC-CVPC	EIF4G2	EIF4G2_K562	K562	0	1.41607063409817	0.5018932293486	2.77983124620195e-06
Arteria	iPSC-CVPC	EIF4G2	EIF4G2_K562	K562	2.5	1.26859413696261	0.343230579622599	0.00475358445530968
Arteria	iPSC-CVPC	EIF4G2	EIF4G2_K562	K562	1.5	1.33442693024881	0.416220309411071	6.42690785188842e-05
Arteria	iPSC-CVPC	EIF4G2	EIF4G2_K562	K562	1	1.24487186261246	0.315997250174949	0.00194724981658955
Arteria	iPSC-CVPC	EIF4G2	EIF4G2_K562	K562	2	1.27668736938975	0.352405286317131	0.00138166369782272
Arteria	iPSC-CVPC	EIF4G2	EIF4G2_K562	K562	5	1.08385184435157	0.116167562939671	0.652005253998232
Arteria	iPSC-CVPC	EIF4G2	EIF4G2_K562	K562	6	1.22334205161047	0.290827843903493	0.314927063579026
Arteria	iPSC-CVPC	EIF4G2	EIF4G2_K562	K562	0.5	1.28801402082615	0.365148298162355	0.000404236561552051
Arteria	iPSC-CVPC	EIF4G2	EIF4G2_K562	K562	3	1.18617891788426	0.246321635917848	0.0775425542126778
Arteria	iPSC-CVPC	EIF4G2	EIF4G2_K562	K562	4.5	1.15735478060699	0.210831182304884	0.342499699383288
Arteria	iPSC-CVPC	EIF4G2	EIF4G2_K562	K562	3.5	1.16993951368906	0.226433943862892	0.158734307996816
Arteria	iPSC-CVPC	EIF4G2	EIF4G2_K562	K562	5.5	1.13466039284273	0.182260559299455	0.485428895089924
Arteria	iPSC-CVPC	EWSR1	EWSR1_K562	K562	5	1.18693690966622	0.247243252140168	0.332208132328946
Arteria	iPSC-CVPC	EWSR1	EWSR1_K562	K562	1.5	1.36467060637078	0.448552766601125	7.76667738674962e-05
Arteria	iPSC-CVPC	EWSR1	EWSR1_K562	K562	5.5	1.17085896910289	0.227567312535017	0.451123199214045
Arteria	iPSC-CVPC	EWSR1	EWSR1_K562	K562	0	1.49654676295199	0.581637359774794	8.34018135640661e-07
Arteria	iPSC-CVPC	EWSR1	EWSR1_K562	K562	0.5	1.38608678334456	0.471017587908951	3.44614222152022e-05
Arteria	iPSC-CVPC	EWSR1	EWSR1_K562	K562	1	1.360311969334	0.443937552209144	6.66121970656796e-05
Arteria	iPSC-CVPC	EWSR1	EWSR1_K562	K562	6	1.2256913404841	0.293595718329505	0.335953413934247
Arteria	iPSC-CVPC	EWSR1	EWSR1_K562	K562	2	1.33574783041984	0.41764767387409	0.000463302531309818
Arteria	iPSC-CVPC	EWSR1	EWSR1_K562	K562	3	1.15127031024269	0.203226607980412	0.175514403346893
Arteria	iPSC-CVPC	EWSR1	EWSR1_K562	K562	3.5	1.23634959424204	0.306086742081815	0.0766568466836434
Arteria	iPSC-CVPC	EWSR1	EWSR1_K562	K562	4	1.00394578910518	0.00568136898922772	0.941070783055166
Arteria	iPSC-CVPC	EWSR1	EWSR1_K562	K562	4.5	1.15278958736013	0.205129209456192	0.394206458256096
Arteria	iPSC-CVPC	EWSR1	EWSR1_K562	K562	2.5	1.27608371759347	0.35172298035277	0.00759393527046793
Arteria	iPSC-CVPC	FMR1	FMR1_K562	K562	0	1.928485726007	0.947468467670002	1.05572012522053e-15
Arteria	iPSC-CVPC	FMR1	FMR1_K562	K562	0.5	1.69543989641248	0.761659641523712	6.92972848784608e-12
Arteria	iPSC-CVPC	FMR1	FMR1_K562	K562	1	1.56157675573705	0.643003483479322	3.302498395675e-09
Arteria	iPSC-CVPC	FMR1	FMR1_K562	K562	1.5	1.56462245593397	0.645814576223477	3.86112855106329e-09
Arteria	iPSC-CVPC	FMR1	FMR1_K562	K562	2	1.52774465303884	0.611403431738198	1.04473260661814e-07
Arteria	iPSC-CVPC	FMR1	FMR1_K562	K562	2.5	1.51663789500728	0.600876675936967	1.74053933123134e-06
Arteria	iPSC-CVPC	FMR1	FMR1_K562	K562	3	1.30832776428336	0.387724012296195	0.00765282218973119
Arteria	iPSC-CVPC	FMR1	FMR1_K562	K562	3.5	1.18964947219715	0.250536548980288	0.15143610905547
Arteria	iPSC-CVPC	FMR1	FMR1_K562	K562	4	1.06073926111615	0.08507007291297	0.660738246767725
Arteria	iPSC-CVPC	FMR1	FMR1_K562	K562	4.5	1.18032160131452	0.239180003152138	0.311809737632521
Arteria	iPSC-CVPC	FMR1	FMR1_K562	K562	5	1.15072079654315	0.202537829729304	0.442734501398032
Arteria	iPSC-CVPC	FMR1	FMR1_K562	K562	5.5	1.13339124398857	0.180645962065931	0.524431008129505
Arteria	iPSC-CVPC	FMR1	FMR1_K562	K562	6	0.906350262797341	-0.141859401408138	0.811463989721393
Arteria	iPSC-CVPC	FUBP3	FUBP3_HepG2	HepG2	1	1.1779282958803	0.236251720555124	0.113558701060392
Arteria	iPSC-CVPC	FUBP3	FUBP3_HepG2	HepG2	1.5	1.16430354954048	0.21946723721932	0.155819001333529
Arteria	iPSC-CVPC	FUBP3	FUBP3_HepG2	HepG2	2.5	1.28025282904298	0.356428747090533	0.0394266686582906
Arteria	iPSC-CVPC	FUBP3	FUBP3_HepG2	HepG2	3	1.44388480326003	0.529955644998645	0.00631411547138449
Arteria	iPSC-CVPC	FUBP3	FUBP3_HepG2	HepG2	3.5	1.23844051280775	0.308524571904091	0.181969079543275
Arteria	iPSC-CVPC	FUBP3	FUBP3_HepG2	HepG2	2	1.20165071093621	0.265017602512465	0.102800770491173
Arteria	iPSC-CVPC	FUBP3	FUBP3_HepG2	HepG2	4.5	1.25652006522745	0.329433709637195	0.26070301104959
Arteria	iPSC-CVPC	FUBP3	FUBP3_HepG2	HepG2	5	1.28488939275599	0.361644173123066	0.304058145445492
Arteria	iPSC-CVPC	FUBP3	FUBP3_HepG2	HepG2	5.5	1.13218980510474	0.179115837965709	0.667900895580256
Arteria	iPSC-CVPC	FUBP3	FUBP3_HepG2	HepG2	6	1.35363073898227	0.436834235445315	0.263933635444298
Arteria	iPSC-CVPC	FUBP3	FUBP3_HepG2	HepG2	4	1.31130756777176	0.391006110011894	0.143044943212723
Arteria	iPSC-CVPC	FUBP3	FUBP3_HepG2	HepG2	0	1.46211434942407	0.548056146376403	0.000439762454775926
Arteria	iPSC-CVPC	FUBP3	FUBP3_HepG2	HepG2	0.5	1.38324427864252	0.46805595653611	0.00184596595585995
Arteria	iPSC-CVPC	FUS	FUS_HepG2	HepG2	0	1.47111108893041	0.556906193837925	1.27813599621761e-09
Arteria	iPSC-CVPC	FUS	FUS_HepG2	HepG2	2.5	1.40460504243182	0.490164519465215	1.6553820031322e-06
Arteria	iPSC-CVPC	FUS	FUS_HepG2	HepG2	5	1.01752825975802	0.0250688629402577	0.879454373818851
Arteria	iPSC-CVPC	FUS	FUS_HepG2	HepG2	6	0.885894799368012	-0.174792706988843	0.636922184243802
Arteria	iPSC-CVPC	FUS	FUS_HepG2	HepG2	1	1.37409622020053	0.458483031481895	1.60116570604105e-07
Arteria	iPSC-CVPC	FUS	FUS_HepG2	HepG2	3	1.34830745877927	0.431149516310607	0.000217792947359666
Arteria	iPSC-CVPC	FUS	FUS_HepG2	HepG2	2	1.42246291248774	0.508391038002834	5.12348406942241e-08
Arteria	iPSC-CVPC	FUS	FUS_HepG2	HepG2	5.5	0.938149382239074	-0.0921104324276832	0.800759494953869
Arteria	iPSC-CVPC	FUS	FUS_HepG2	HepG2	3.5	1.17547417370132	0.233242841940873	0.0920682618939512
Arteria	iPSC-CVPC	FUS	FUS_HepG2	HepG2	0.5	1.39901157734543	0.484407901394542	5.00413685070626e-08
Arteria	iPSC-CVPC	FUS	FUS_HepG2	HepG2	1.5	1.38818170103226	0.473196416634857	9.42817203216081e-08
Arteria	iPSC-CVPC	FUS	FUS_HepG2	HepG2	4	1.00555989166679	0.00799901186448887	0.953859774369657
Arteria	iPSC-CVPC	FUS	FUS_HepG2	HepG2	4.5	1.03796880696756	0.0537630884844194	0.789662456001386
Arteria	iPSC-CVPC	FUS	FUS_K562	K562	1.5	1.32611137144136	0.40720194308167	1.24354692143702e-07
Arteria	iPSC-CVPC	FUS	FUS_K562	K562	2	1.27961308885167	0.355707654619072	1.27824204189089e-05
Arteria	iPSC-CVPC	FUS	FUS_K562	K562	2.5	1.25142340901961	0.323569996332745	0.00032079330971027
Arteria	iPSC-CVPC	FUS	FUS_K562	K562	3	1.20905945104596	0.273885185546876	0.00795237935688274
Arteria	iPSC-CVPC	FUS	FUS_K562	K562	1	1.28397309072368	0.360614967034741	1.8776203387272e-06
Arteria	iPSC-CVPC	FUS	FUS_K562	K562	4.5	0.987608095320702	-0.0179894327372008	0.954007379612444
Arteria	iPSC-CVPC	FUS	FUS_K562	K562	5	0.961430629375704	-0.0567453291226634	0.843608505913643
Arteria	iPSC-CVPC	FUS	FUS_K562	K562	5.5	0.937674373514927	-0.0928410903514373	0.716014209407697
Arteria	iPSC-CVPC	FUS	FUS_K562	K562	6	0.863289781742426	-0.212083182634513	0.415178450018488
Arteria	iPSC-CVPC	FUS	FUS_K562	K562	0	1.44882674173004	0.534885080200602	1.08110831917301e-11
Arteria	iPSC-CVPC	FUS	FUS_K562	K562	0.5	1.32741955114338	0.408624428499524	8.51364150580975e-08
Arteria	iPSC-CVPC	FUS	FUS_K562	K562	4	1.00912053439889	0.0130985074410115	0.920216506043103
Arteria	iPSC-CVPC	FUS	FUS_K562	K562	3.5	1.13726945073263	0.185574109270617	0.122173065432737
Arteria	iPSC-CVPC	FXR2	FXR2_HepG2	HepG2	4.5	1.28048643345758	0.356691967900513	0.220197475027695
Arteria	iPSC-CVPC	FXR2	FXR2_HepG2	HepG2	1.5	1.60352827583194	0.681249793781337	2.4022718559119e-06
Arteria	iPSC-CVPC	FXR2	FXR2_HepG2	HepG2	1	1.65939605070106	0.7306582577168	3.45138823843073e-07
Arteria	iPSC-CVPC	FXR2	FXR2_HepG2	HepG2	3.5	1.40889818541503	0.494567358486342	0.0258201193192166
Arteria	iPSC-CVPC	FXR2	FXR2_HepG2	HepG2	0.5	1.7743447675636	0.827286362585728	2.08164133026504e-08
Arteria	iPSC-CVPC	FXR2	FXR2_HepG2	HepG2	3	1.40545092940989	0.491033083648632	0.010891162982574
Arteria	iPSC-CVPC	FXR2	FXR2_HepG2	HepG2	0	1.9179527543589	0.939567182352065	2.5166457097991e-09
Arteria	iPSC-CVPC	FXR2	FXR2_HepG2	HepG2	5.5	1.25888148474724	0.332142469382945	0.327745969075133
Arteria	iPSC-CVPC	FXR2	FXR2_HepG2	HepG2	2	1.60192537110847	0.679806938483448	6.22478471282328e-06
Arteria	iPSC-CVPC	FXR2	FXR2_HepG2	HepG2	5	1.32388743884863	0.404780464805094	0.205303233684503
Arteria	iPSC-CVPC	FXR2	FXR2_HepG2	HepG2	6	1.1151755199184	0.157270796950284	0.637834666468771
Arteria	iPSC-CVPC	FXR2	FXR2_HepG2	HepG2	4	1.2731354092259	0.348385870794265	0.177309762360954
Arteria	iPSC-CVPC	FXR2	FXR2_HepG2	HepG2	2.5	1.48095309374072	0.566525946839243	0.000757498548052204
Arteria	iPSC-CVPC	FXR2	FXR2_K562	K562	4.5	1.136827427098	0.185013266573125	0.431572964998396
Arteria	iPSC-CVPC	FXR2	FXR2_K562	K562	6	0.991829049863643	-0.0118366135564942	1
Arteria	iPSC-CVPC	FXR2	FXR2_K562	K562	0	1.82642816006861	0.86902500847625	6.52657817046084e-13
Arteria	iPSC-CVPC	FXR2	FXR2_K562	K562	1	1.66856970091037	0.738611953261276	4.19129413395936e-11
Arteria	iPSC-CVPC	FXR2	FXR2_K562	K562	0.5	1.73999202417695	0.799080693024159	3.73390793080882e-12
Arteria	iPSC-CVPC	FXR2	FXR2_K562	K562	5	1.06061019111384	0.0848945161207748	0.764796095795685
Arteria	iPSC-CVPC	FXR2	FXR2_K562	K562	2.5	1.5261955665475	0.609939840816341	2.47646136863493e-06
Arteria	iPSC-CVPC	FXR2	FXR2_K562	K562	3	1.39873374051541	0.484121360789422	0.00126790156738929
Arteria	iPSC-CVPC	FXR2	FXR2_K562	K562	3.5	1.25007395082618	0.322013443154912	0.0693745667040878
Arteria	iPSC-CVPC	FXR2	FXR2_K562	K562	4	1.04453087353089	0.0628551352309085	0.761521125907435
Arteria	iPSC-CVPC	FXR2	FXR2_K562	K562	1.5	1.68462550262055	0.752427911548814	3.14170263427246e-11
Arteria	iPSC-CVPC	FXR2	FXR2_K562	K562	5.5	1.09507984980837	0.131036070486248	0.659027584159389
Arteria	iPSC-CVPC	FXR2	FXR2_K562	K562	2	1.62670857289692	0.701955813336565	2.91753295898053e-09
Arteria	iPSC-CVPC	HNRNPA1	HNRNPA1_HepG2	HepG2	1.5	1.34563566427007	0.428287847911197	5.95480405271252e-10
Arteria	iPSC-CVPC	HNRNPA1	HNRNPA1_HepG2	HepG2	5.5	0.913997260677335	-0.129738253469604	0.557415421435803
Arteria	iPSC-CVPC	HNRNPA1	HNRNPA1_HepG2	HepG2	3.5	1.23411349093809	0.303475073000122	0.0049981818804368
Arteria	iPSC-CVPC	HNRNPA1	HNRNPA1_HepG2	HepG2	6	0.875975975199174	-0.191036792339806	0.421414135681702
Arteria	iPSC-CVPC	HNRNPA1	HNRNPA1_HepG2	HepG2	0	1.59428634143208	0.672910767511679	2.0689826657215e-21
Arteria	iPSC-CVPC	HNRNPA1	HNRNPA1_HepG2	HepG2	0.5	1.40755709818819	0.493193447067233	5.25985692707257e-13
Arteria	iPSC-CVPC	HNRNPA1	HNRNPA1_HepG2	HepG2	1	1.33742976375676	0.419463129165771	6.39800318598717e-10
Arteria	iPSC-CVPC	HNRNPA1	HNRNPA1_HepG2	HepG2	2	1.42178901344805	0.507707391936224	3.64718331907686e-12
Arteria	iPSC-CVPC	HNRNPA1	HNRNPA1_HepG2	HepG2	3	1.3573894000371	0.440834652159748	1.96969868696919e-06
Arteria	iPSC-CVPC	HNRNPA1	HNRNPA1_HepG2	HepG2	2.5	1.38301019767025	0.467811794285993	5.75095380896519e-09
Arteria	iPSC-CVPC	HNRNPA1	HNRNPA1_HepG2	HepG2	4.5	1.04480390564509	0.0632321950332253	0.679589753350158
Arteria	iPSC-CVPC	HNRNPA1	HNRNPA1_HepG2	HepG2	5	0.978119872269508	-0.0319168111708395	0.906332721506508
Arteria	iPSC-CVPC	HNRNPA1	HNRNPA1_HepG2	HepG2	4	1.09888216200756	0.136036688014027	0.281838775220447
Arteria	iPSC-CVPC	HNRNPA1	HNRNPA1_K562	K562	2	1.43422204124599	0.52026839433716	1.73410732582365e-08
Arteria	iPSC-CVPC	HNRNPA1	HNRNPA1_K562	K562	2.5	1.33397714033943	0.41573394403261	4.40297932766135e-05
Arteria	iPSC-CVPC	HNRNPA1	HNRNPA1_K562	K562	5.5	1.1297756616174	0.176036326619632	0.454220737279186
Arteria	iPSC-CVPC	HNRNPA1	HNRNPA1_K562	K562	1.5	1.46312191224784	0.549049984696924	3.93270996296232e-10
Arteria	iPSC-CVPC	HNRNPA1	HNRNPA1_K562	K562	4	1.1085372752857	0.148657282578405	0.359343430380645
Arteria	iPSC-CVPC	HNRNPA1	HNRNPA1_K562	K562	4.5	1.23489252049622	0.304385481571267	0.0872850938980242
Arteria	iPSC-CVPC	HNRNPA1	HNRNPA1_K562	K562	5	1.09839536063787	0.135397437008002	0.499963371662882
Arteria	iPSC-CVPC	HNRNPA1	HNRNPA1_K562	K562	6	1.06531069555545	0.0912742507015975	0.70928792804678
Arteria	iPSC-CVPC	HNRNPA1	HNRNPA1_K562	K562	1	1.48209290614309	0.567635886935761	5.51772032712437e-11
Arteria	iPSC-CVPC	HNRNPA1	HNRNPA1_K562	K562	3	1.33810286288992	0.420189023361376	0.000287478147445506
Arteria	iPSC-CVPC	HNRNPA1	HNRNPA1_K562	K562	3.5	1.18815909880317	0.248728031160683	0.0689880519766473
Arteria	iPSC-CVPC	HNRNPA1	HNRNPA1_K562	K562	0	1.70619921093439	0.770786101432545	8.4108977845617e-17
Arteria	iPSC-CVPC	HNRNPA1	HNRNPA1_K562	K562	0.5	1.56266225317641	0.644005994382757	3.03087491032348e-13
Arteria	iPSC-CVPC	HNRNPC	HNRNPC_HepG2	HepG2	0.5	1.36959631060003	0.453750720544598	3.34929032793169e-14
Arteria	iPSC-CVPC	HNRNPC	HNRNPC_HepG2	HepG2	4.5	0.879094544960093	-0.185909762044227	0.172718052157853
Arteria	iPSC-CVPC	HNRNPC	HNRNPC_HepG2	HepG2	3.5	1.17082348566249	0.227523590310078	0.0195399872203068
Arteria	iPSC-CVPC	HNRNPC	HNRNPC_HepG2	HepG2	6	0.738994956589046	-0.43636357642771	0.024392638653132
Arteria	iPSC-CVPC	HNRNPC	HNRNPC_HepG2	HepG2	2	1.41355511980254	0.499328140343012	1.99229513922145e-14
Arteria	iPSC-CVPC	HNRNPC	HNRNPC_HepG2	HepG2	0	1.55771193252379	0.639428460649369	2.03444761190057e-25
Arteria	iPSC-CVPC	HNRNPC	HNRNPC_HepG2	HepG2	5	0.814336595231688	-0.296302858259882	0.055477364196234
Arteria	iPSC-CVPC	HNRNPC	HNRNPC_HepG2	HepG2	4	1.01533243643376	0.0219521666918958	0.843703428744849
Arteria	iPSC-CVPC	HNRNPC	HNRNPC_HepG2	HepG2	3	1.29808137506514	0.376380826883314	6.48597478536914e-06
Arteria	iPSC-CVPC	HNRNPC	HNRNPC_HepG2	HepG2	1	1.30770327441412	0.387035221956001	9.14022983496959e-11
Arteria	iPSC-CVPC	HNRNPC	HNRNPC_HepG2	HepG2	2.5	1.37391079206239	0.458288333102636	2.20266293339824e-10
Arteria	iPSC-CVPC	HNRNPC	HNRNPC_HepG2	HepG2	1.5	1.36681336380867	0.450816258678947	1.74300279610828e-13
Arteria	iPSC-CVPC	HNRNPC	HNRNPC_HepG2	HepG2	5.5	0.74810176139015	-0.418693567197676	0.0159467477251764
Arteria	iPSC-CVPC	HNRNPC	HNRNPC_K562	K562	1	1.43348381643307	0.519525617111716	2.08829631498962e-13
Arteria	iPSC-CVPC	HNRNPC	HNRNPC_K562	K562	3.5	1.16302123414365	0.21787743740794	0.0535652317473039
Arteria	iPSC-CVPC	HNRNPC	HNRNPC_K562	K562	0.5	1.46531244657891	0.551208321349572	1.19233169876205e-14
Arteria	iPSC-CVPC	HNRNPC	HNRNPC_K562	K562	1.5	1.44719144908293	0.533255788747514	1.29020379623971e-13
Arteria	iPSC-CVPC	HNRNPC	HNRNPC_K562	K562	0	1.61990043504966	0.695905142570156	5.39722296884075e-21
Arteria	iPSC-CVPC	HNRNPC	HNRNPC_K562	K562	3	1.29796228369827	0.376248461987263	9.53537939442699e-05
Arteria	iPSC-CVPC	HNRNPC	HNRNPC_K562	K562	6	0.811315670504498	-0.301664740664108	0.221510669769673
Arteria	iPSC-CVPC	HNRNPC	HNRNPC_K562	K562	5.5	0.951145010748842	-0.0722627849900466	0.785337827532942
Arteria	iPSC-CVPC	HNRNPC	HNRNPC_K562	K562	2.5	1.41129082559734	0.497015315655428	2.8232270363576e-09
Arteria	iPSC-CVPC	HNRNPC	HNRNPC_K562	K562	5	0.958716366276131	-0.0608240340660739	0.758956610649746
Arteria	iPSC-CVPC	HNRNPC	HNRNPC_K562	K562	4	1.08098217236032	0.112342730233118	0.39902264031979
Arteria	iPSC-CVPC	HNRNPC	HNRNPC_K562	K562	4.5	1.05933289076661	0.0831560212381391	0.589439938160946
Arteria	iPSC-CVPC	HNRNPC	HNRNPC_K562	K562	2	1.47848977552865	0.564124266559279	1.00434023250366e-13
Arteria	iPSC-CVPC	HNRNPK	HNRNPK_HepG2	HepG2	1	1.35110207239233	0.434136670793535	3.32128355173114e-09
Arteria	iPSC-CVPC	HNRNPK	HNRNPK_HepG2	HepG2	3	1.18334117018358	0.242866078387048	0.0167713601850197
Arteria	iPSC-CVPC	HNRNPK	HNRNPK_HepG2	HepG2	3.5	1.11019254790362	0.150809914246567	0.197422374721184
Arteria	iPSC-CVPC	HNRNPK	HNRNPK_HepG2	HepG2	1.5	1.36290602232564	0.446686086135001	2.11450144797234e-09
Arteria	iPSC-CVPC	HNRNPK	HNRNPK_HepG2	HepG2	5	0.919640053053622	-0.120858793812266	0.567245517881733
Arteria	iPSC-CVPC	HNRNPK	HNRNPK_HepG2	HepG2	5.5	0.894210997257397	-0.161312806229856	0.481565614243779
Arteria	iPSC-CVPC	HNRNPK	HNRNPK_HepG2	HepG2	4	0.985187871940771	-0.0215292270977909	0.922670480027761
Arteria	iPSC-CVPC	HNRNPK	HNRNPK_HepG2	HepG2	2	1.29594973054798	0.374009757654868	2.28168395247311e-06
Arteria	iPSC-CVPC	HNRNPK	HNRNPK_HepG2	HepG2	2.5	1.26023496868166	0.333692746858482	0.000129012160187862
Arteria	iPSC-CVPC	HNRNPK	HNRNPK_HepG2	HepG2	0.5	1.36076576220347	0.444418747377413	1.85524724992388e-09
Arteria	iPSC-CVPC	HNRNPK	HNRNPK_HepG2	HepG2	4.5	0.991756350189202	-0.0119423649497377	1
Arteria	iPSC-CVPC	HNRNPK	HNRNPK_HepG2	HepG2	6	0.95924655509969	-0.0600264161377587	0.874557767930795
Arteria	iPSC-CVPC	HNRNPK	HNRNPK_HepG2	HepG2	0	1.46110932962793	0.547064133932462	9.86222336528336e-13
Arteria	iPSC-CVPC	HNRNPK	HNRNPK_K562	K562	1.5	1.35026488921651	0.433242456810833	7.67298511156138e-06
Arteria	iPSC-CVPC	HNRNPK	HNRNPK_K562	K562	3	1.20850073908186	0.273218355411655	0.0365720143013438
Arteria	iPSC-CVPC	HNRNPK	HNRNPK_K562	K562	3.5	1.15721154245516	0.210652618424884	0.15909085504769
Arteria	iPSC-CVPC	HNRNPK	HNRNPK_K562	K562	4	1.00887446388238	0.0127466683968762	0.949597814929554
Arteria	iPSC-CVPC	HNRNPK	HNRNPK_K562	K562	4.5	1.07582911533061	0.105448938448605	0.610744764878664
Arteria	iPSC-CVPC	HNRNPK	HNRNPK_K562	K562	5	0.925365262598554	-0.111905152475868	0.74015232739032
Arteria	iPSC-CVPC	HNRNPK	HNRNPK_K562	K562	5.5	0.981573015359021	-0.0268325067900082	1
Arteria	iPSC-CVPC	HNRNPK	HNRNPK_K562	K562	2	1.37958330622339	0.464232576550974	5.22211670519342e-06
Arteria	iPSC-CVPC	HNRNPK	HNRNPK_K562	K562	1	1.30055412703007	0.379126443243123	7.4517265683642e-05
Arteria	iPSC-CVPC	HNRNPK	HNRNPK_K562	K562	0.5	1.28483489379009	0.361582979485868	0.000190900781513674
Arteria	iPSC-CVPC	HNRNPK	HNRNPK_K562	K562	0	1.36419595743324	0.448050892537841	8.22669344525716e-06
Arteria	iPSC-CVPC	HNRNPK	HNRNPK_K562	K562	2.5	1.28120998282122	0.357506944335568	0.00148151807825741
Arteria	iPSC-CVPC	HNRNPK	HNRNPK_K562	K562	6	1.07557912227117	0.10511365689448	0.681155659375827
Arteria	iPSC-CVPC	HNRNPL	HNRNPL_HepG2	HepG2	6	0.91275732643487	-0.131696751091531	0.609193680948807
Arteria	iPSC-CVPC	HNRNPL	HNRNPL_HepG2	HepG2	5.5	0.959422965558673	-0.0597611213672816	0.794664749146868
Arteria	iPSC-CVPC	HNRNPL	HNRNPL_HepG2	HepG2	4.5	1.06824911863699	0.0952481267184677	0.53537561364387
Arteria	iPSC-CVPC	HNRNPL	HNRNPL_HepG2	HepG2	0.5	1.35276133916522	0.435907334381812	1.59703923310788e-10
Arteria	iPSC-CVPC	HNRNPL	HNRNPL_HepG2	HepG2	3	1.39035762737118	0.475456020267709	2.60427033491185e-07
Arteria	iPSC-CVPC	HNRNPL	HNRNPL_HepG2	HepG2	0	1.45730403722378	0.543301898154539	1.17088724908028e-14
Arteria	iPSC-CVPC	HNRNPL	HNRNPL_HepG2	HepG2	2.5	1.33484607004691	0.416673384771339	2.34403118885434e-07
Arteria	iPSC-CVPC	HNRNPL	HNRNPL_HepG2	HepG2	3.5	1.27935570894922	0.355417443413319	0.000946381406977944
Arteria	iPSC-CVPC	HNRNPL	HNRNPL_HepG2	HepG2	5	0.96317411389759	-0.0541314758933802	0.813986904985877
Arteria	iPSC-CVPC	HNRNPL	HNRNPL_HepG2	HepG2	1.5	1.3068556717866	0.386099819713886	2.33673021555975e-08
Arteria	iPSC-CVPC	HNRNPL	HNRNPL_HepG2	HepG2	1	1.28321111540394	0.359758543841793	1.10877094245836e-07
Arteria	iPSC-CVPC	HNRNPL	HNRNPL_HepG2	HepG2	2	1.33314552617626	0.414834273625177	1.53509259686319e-08
Arteria	iPSC-CVPC	HNRNPL	HNRNPL_HepG2	HepG2	4	1.13404431276542	0.181477014669797	0.151163191071172
Arteria	iPSC-CVPC	HNRNPL	HNRNPL_K562	K562	3	1.41485759307728	0.500656851572909	4.84497367948237e-08
Arteria	iPSC-CVPC	HNRNPL	HNRNPL_K562	K562	5.5	0.993207685704641	-0.00983266937233675	1
Arteria	iPSC-CVPC	HNRNPL	HNRNPL_K562	K562	6	0.839778471895674	-0.251919290386077	0.275216118118059
Arteria	iPSC-CVPC	HNRNPL	HNRNPL_K562	K562	2.5	1.44064751754371	0.526717395265023	4.22674245510188e-11
Arteria	iPSC-CVPC	HNRNPL	HNRNPL_K562	K562	0	1.63817683898422	0.712091102372623	7.71251878881046e-24
Arteria	iPSC-CVPC	HNRNPL	HNRNPL_K562	K562	5	0.984344128930914	-0.0227653216928852	0.953322779491999
Arteria	iPSC-CVPC	HNRNPL	HNRNPL_K562	K562	0.5	1.44361198583983	0.529683026624246	7.78045088259983e-15
Arteria	iPSC-CVPC	HNRNPL	HNRNPL_K562	K562	2	1.37337779406992	0.45772854220621	3.37164459836848e-10
Arteria	iPSC-CVPC	HNRNPL	HNRNPL_K562	K562	3.5	1.24639512318664	0.317761493640421	0.00320882106719943
Arteria	iPSC-CVPC	HNRNPL	HNRNPL_K562	K562	1.5	1.36077156340028	0.444424897840821	1.09599082422267e-10
Arteria	iPSC-CVPC	HNRNPL	HNRNPL_K562	K562	4	1.11701389437436	0.159647131407896	0.211302646151714
Arteria	iPSC-CVPC	HNRNPL	HNRNPL_K562	K562	4.5	1.07885293007377	0.109498209112638	0.471793382315503
Arteria	iPSC-CVPC	HNRNPL	HNRNPL_K562	K562	1	1.32633647690442	0.407446817668904	1.58259802756827e-09
Arteria	iPSC-CVPC	HNRNPM	HNRNPM_HepG2	HepG2	5.5	0.959968277596457	-0.0589413625019419	0.874099683449115
Arteria	iPSC-CVPC	HNRNPM	HNRNPM_HepG2	HepG2	3	1.28307549236608	0.359606056832939	0.00128897643347953
Arteria	iPSC-CVPC	HNRNPM	HNRNPM_HepG2	HepG2	5	0.97501407681825	-0.0365050468873943	0.942964197702646
Arteria	iPSC-CVPC	HNRNPM	HNRNPM_HepG2	HepG2	2.5	1.2843724499996	0.361063624462183	0.00021979183089024
Arteria	iPSC-CVPC	HNRNPM	HNRNPM_HepG2	HepG2	2	1.28815727401468	0.365308746083897	3.90384647769772e-05
Arteria	iPSC-CVPC	HNRNPM	HNRNPM_HepG2	HepG2	0	1.47056018877518	0.556365833711839	9.01996610271423e-11
Arteria	iPSC-CVPC	HNRNPM	HNRNPM_HepG2	HepG2	4.5	0.993838628274065	-0.00891647759544421	1
Arteria	iPSC-CVPC	HNRNPM	HNRNPM_HepG2	HepG2	0.5	1.30094253438505	0.379557236314937	4.90366221079224e-06
Arteria	iPSC-CVPC	HNRNPM	HNRNPM_HepG2	HepG2	4	0.993399143604193	-0.00955459183932738	1
Arteria	iPSC-CVPC	HNRNPM	HNRNPM_HepG2	HepG2	6	0.958283353827334	-0.0614757868197098	0.859410938090767
Arteria	iPSC-CVPC	HNRNPM	HNRNPM_HepG2	HepG2	1	1.2143165466594	0.280144550726303	0.000695867519315849
Arteria	iPSC-CVPC	HNRNPM	HNRNPM_HepG2	HepG2	1.5	1.23678526579745	0.306595037208868	0.000295405982793447
Arteria	iPSC-CVPC	HNRNPM	HNRNPM_HepG2	HepG2	3.5	1.16454155867445	0.219762125528761	0.0920361638180342
Arteria	iPSC-CVPC	HNRNPM	HNRNPM_K562	K562	2.5	1.39675311738099	0.482077040213247	2.85263082797107e-07
Arteria	iPSC-CVPC	HNRNPM	HNRNPM_K562	K562	3	1.38419647394864	0.469048734790901	1.21933084454345e-05
Arteria	iPSC-CVPC	HNRNPM	HNRNPM_K562	K562	2	1.43918709718045	0.525254157490513	8.63928992722851e-10
Arteria	iPSC-CVPC	HNRNPM	HNRNPM_K562	K562	5	0.91940299360672	-0.121230731261971	0.625681961495099
Arteria	iPSC-CVPC	HNRNPM	HNRNPM_K562	K562	5.5	0.909178686100835	-0.137364231471873	0.589738557794496
Arteria	iPSC-CVPC	HNRNPM	HNRNPM_K562	K562	0	1.64890468616932	0.72150800716527	1.95109819465608e-17
Arteria	iPSC-CVPC	HNRNPM	HNRNPM_K562	K562	0.5	1.48774223681815	0.573124589700409	1.94119924786491e-12
Arteria	iPSC-CVPC	HNRNPM	HNRNPM_K562	K562	1	1.41462390161535	0.500418542529623	4.34666507762463e-10
Arteria	iPSC-CVPC	HNRNPM	HNRNPM_K562	K562	1.5	1.4073515840747	0.492982787165719	1.43331105883943e-09
Arteria	iPSC-CVPC	HNRNPM	HNRNPM_K562	K562	4	1.02453008571118	0.0349623502535222	0.831658290539323
Arteria	iPSC-CVPC	HNRNPM	HNRNPM_K562	K562	4.5	0.975928713345042	-0.0351523248242503	0.902624677135932
Arteria	iPSC-CVPC	HNRNPM	HNRNPM_K562	K562	6	0.886648489419101	-0.173565831491379	0.545408302597667
Arteria	iPSC-CVPC	HNRNPM	HNRNPM_K562	K562	3.5	1.22993224902678	0.298578846714795	0.0179387909884531
Arteria	iPSC-CVPC	HNRNPU	HNRNPU_HepG2	HepG2	3	1.22972417149694	0.298334753744222	0.00764577561286392
Arteria	iPSC-CVPC	HNRNPU	HNRNPU_HepG2	HepG2	5	0.951252211208879	-0.0721001926876033	0.776814992816584
Arteria	iPSC-CVPC	HNRNPU	HNRNPU_HepG2	HepG2	6	1.08893341106561	0.122915735080849	0.597802642440244
Arteria	iPSC-CVPC	HNRNPU	HNRNPU_HepG2	HepG2	2	1.31949184609913	0.399982435447279	5.21189590722617e-06
Arteria	iPSC-CVPC	HNRNPU	HNRNPU_HepG2	HepG2	0.5	1.34880968679133	0.431686802480731	1.71897703822484e-07
Arteria	iPSC-CVPC	HNRNPU	HNRNPU_HepG2	HepG2	1.5	1.31881336849292	0.399240416446608	1.60365666128392e-06
Arteria	iPSC-CVPC	HNRNPU	HNRNPU_HepG2	HepG2	2.5	1.30408032807403	0.383032738698391	7.53285060003674e-05
Arteria	iPSC-CVPC	HNRNPU	HNRNPU_HepG2	HepG2	3.5	1.1023763960545	0.140616902679794	0.286132849952327
Arteria	iPSC-CVPC	HNRNPU	HNRNPU_HepG2	HepG2	4.5	1.01380346135146	0.0197779947315451	0.900976912203882
Arteria	iPSC-CVPC	HNRNPU	HNRNPU_HepG2	HepG2	5.5	0.960940711861209	-0.0574806725693192	0.875141175122989
Arteria	iPSC-CVPC	HNRNPU	HNRNPU_HepG2	HepG2	0	1.52908763612867	0.612671093804721	7.59437164256475e-13
Arteria	iPSC-CVPC	HNRNPU	HNRNPU_HepG2	HepG2	1	1.33583731803968	0.417744323120309	2.99517750942322e-07
Arteria	iPSC-CVPC	HNRNPU	HNRNPU_HepG2	HepG2	4	1.0122681955952	0.0175915757968199	0.913850691189089
Arteria	iPSC-CVPC	HNRNPU	HNRNPU_K562	K562	2.5	1.30727074117864	0.386557960189099	5.59187563130646e-07
Arteria	iPSC-CVPC	HNRNPU	HNRNPU_K562	K562	3.5	1.19030810272814	0.251335053151211	0.015691289332048
Arteria	iPSC-CVPC	HNRNPU	HNRNPU_K562	K562	0	1.526852907733	0.610561084069527	8.20814470853345e-20
Arteria	iPSC-CVPC	HNRNPU	HNRNPU_K562	K562	3	1.26246793394719	0.336246744598791	0.000161010711040714
Arteria	iPSC-CVPC	HNRNPU	HNRNPU_K562	K562	1.5	1.32894746272376	0.410284071682504	4.89587216892702e-10
Arteria	iPSC-CVPC	HNRNPU	HNRNPU_K562	K562	4.5	1.02776208097104	0.039506330359226	0.768357413316032
Arteria	iPSC-CVPC	HNRNPU	HNRNPU_K562	K562	0.5	1.37838147178623	0.462975214088604	1.02231711405116e-12
Arteria	iPSC-CVPC	HNRNPU	HNRNPU_K562	K562	5.5	0.923792145761499	-0.114359814687754	0.577019707137985
Arteria	iPSC-CVPC	HNRNPU	HNRNPU_K562	K562	6	0.907733980666485	-0.139658529753862	0.531817004300223
Arteria	iPSC-CVPC	HNRNPU	HNRNPU_K562	K562	1	1.33004236767215	0.411472202611399	1.77901979167054e-10
Arteria	iPSC-CVPC	HNRNPU	HNRNPU_K562	K562	2	1.34239842466742	0.424812927858613	1.19536244755145e-09
Arteria	iPSC-CVPC	HNRNPU	HNRNPU_K562	K562	4	1.04401426146019	0.0621414195681024	0.608441179325884
Arteria	iPSC-CVPC	HNRNPU	HNRNPU_K562	K562	5	0.97790285893654	-0.0322369343018939	0.866843310824083
Arteria	iPSC-CVPC	IGF2BP1	IGF2BP1_HepG2	HepG2	1	1.31304440814635	0.392915710083888	2.64621202776537e-06
Arteria	iPSC-CVPC	IGF2BP1	IGF2BP1_HepG2	HepG2	0	1.52561870120229	0.609394433586617	3.4068336473929e-12
Arteria	iPSC-CVPC	IGF2BP1	IGF2BP1_HepG2	HepG2	3	1.28518366468125	0.36197454867241	0.00158643899635908
Arteria	iPSC-CVPC	IGF2BP1	IGF2BP1_HepG2	HepG2	3.5	1.19289631361756	0.254468649629414	0.0560183462940333
Arteria	iPSC-CVPC	IGF2BP1	IGF2BP1_HepG2	HepG2	5	1.0878081667953	0.121424162089662	0.558037864203599
Arteria	iPSC-CVPC	IGF2BP1	IGF2BP1_HepG2	HepG2	5.5	0.900450847344894	-0.151280568591644	0.570584892517836
Arteria	iPSC-CVPC	IGF2BP1	IGF2BP1_HepG2	HepG2	1.5	1.30417111193956	0.383133168764781	6.95881431998501e-06
Arteria	iPSC-CVPC	IGF2BP1	IGF2BP1_HepG2	HepG2	2	1.33416904220402	0.415941470794572	3.80949087127855e-06
Arteria	iPSC-CVPC	IGF2BP1	IGF2BP1_HepG2	HepG2	2.5	1.28211766029557	0.358528664558671	0.000307378152841782
Arteria	iPSC-CVPC	IGF2BP1	IGF2BP1_HepG2	HepG2	4.5	1.09653608332132	0.132953287043158	0.44168190966686
Arteria	iPSC-CVPC	IGF2BP1	IGF2BP1_HepG2	HepG2	6	0.833251657147576	-0.263175813357465	0.412215868975591
Arteria	iPSC-CVPC	IGF2BP1	IGF2BP1_HepG2	HepG2	4	0.998066469381115	-0.00279219530356635	1
Arteria	iPSC-CVPC	IGF2BP1	IGF2BP1_HepG2	HepG2	0.5	1.39912721831372	0.484527148268085	1.0836819336908e-08
Arteria	iPSC-CVPC	IGF2BP1	IGF2BP1_K562	K562	1	1.30544773119855	0.384544694762778	2.50895452042711e-05
Arteria	iPSC-CVPC	IGF2BP1	IGF2BP1_K562	K562	4.5	0.994196291049012	-0.00839737371826564	1
Arteria	iPSC-CVPC	IGF2BP1	IGF2BP1_K562	K562	4	0.957574918647767	-0.0625427300081683	0.760640723361399
Arteria	iPSC-CVPC	IGF2BP1	IGF2BP1_K562	K562	3	1.17704016421597	0.235163550390425	0.060291062462559
Arteria	iPSC-CVPC	IGF2BP1	IGF2BP1_K562	K562	3.5	1.07101293171195	0.0989758996998164	0.497543072871382
Arteria	iPSC-CVPC	IGF2BP1	IGF2BP1_K562	K562	5	1.01159743872546	0.0166352893431776	0.93637237827201
Arteria	iPSC-CVPC	IGF2BP1	IGF2BP1_K562	K562	5.5	0.953039395457293	-0.0693922433375002	0.859678354285506
Arteria	iPSC-CVPC	IGF2BP1	IGF2BP1_K562	K562	6	0.938463910518549	-0.0916268289116913	0.842762544142954
Arteria	iPSC-CVPC	IGF2BP1	IGF2BP1_K562	K562	0.5	1.35772791702075	0.441194398512537	1.74008318024371e-06
Arteria	iPSC-CVPC	IGF2BP1	IGF2BP1_K562	K562	2	1.35168334787685	0.434757218222531	9.82179359389025e-06
Arteria	iPSC-CVPC	IGF2BP1	IGF2BP1_K562	K562	1.5	1.32307264343452	0.403892275105324	1.35623314393642e-05
Arteria	iPSC-CVPC	IGF2BP1	IGF2BP1_K562	K562	0	1.65788983774486	0.729348146870261	3.54250683536831e-14
Arteria	iPSC-CVPC	IGF2BP1	IGF2BP1_K562	K562	2.5	1.27559200241101	0.351166957454971	0.00118084937014909
Arteria	iPSC-CVPC	IGF2BP2	IGF2BP2_K562	K562	4	0.985139542711369	-0.0216000014666432	0.954166396556448
Arteria	iPSC-CVPC	IGF2BP2	IGF2BP2_K562	K562	4.5	1.0669515493576	0.0934946643642379	0.597252238812154
Arteria	iPSC-CVPC	IGF2BP2	IGF2BP2_K562	K562	5.5	1.05619020665213	0.078869669434407	0.738545423891751
Arteria	iPSC-CVPC	IGF2BP2	IGF2BP2_K562	K562	6	0.901310579874742	-0.149903769274377	0.640704165380816
Arteria	iPSC-CVPC	IGF2BP2	IGF2BP2_K562	K562	0	1.32451590518379	0.405465168125815	5.27342602563235e-06
Arteria	iPSC-CVPC	IGF2BP2	IGF2BP2_K562	K562	5	0.995106602781904	-0.00707700936505617	1
Arteria	iPSC-CVPC	IGF2BP2	IGF2BP2_K562	K562	1	1.15171036266879	0.2037779469196	0.0176949575061946
Arteria	iPSC-CVPC	IGF2BP2	IGF2BP2_K562	K562	0.5	1.17009539575362	0.226626154911485	0.00851379254126457
Arteria	iPSC-CVPC	IGF2BP2	IGF2BP2_K562	K562	1.5	1.23383743764658	0.303152326942463	0.000543740260057213
Arteria	iPSC-CVPC	IGF2BP2	IGF2BP2_K562	K562	2	1.26046167734533	0.333952255646416	0.000346618164868203
Arteria	iPSC-CVPC	IGF2BP2	IGF2BP2_K562	K562	2.5	1.16255890545057	0.217303817681652	0.0374870507141988
Arteria	iPSC-CVPC	IGF2BP2	IGF2BP2_K562	K562	3	1.13614041718042	0.184141150556334	0.127945006737735
Arteria	iPSC-CVPC	IGF2BP2	IGF2BP2_K562	K562	3.5	1.14940858886942	0.200891734756657	0.140357722484625
Arteria	iPSC-CVPC	IGF2BP3	IGF2BP3_HepG2	HepG2	3.5	1.12459174652369	0.169401363966251	0.202010780144468
Arteria	iPSC-CVPC	IGF2BP3	IGF2BP3_HepG2	HepG2	4	0.93124379375679	-0.102769189186154	0.580902308705704
Arteria	iPSC-CVPC	IGF2BP3	IGF2BP3_HepG2	HepG2	5.5	0.986235815220528	-0.0199954495287344	1
Arteria	iPSC-CVPC	IGF2BP3	IGF2BP3_HepG2	HepG2	6	1.04905911296658	0.069095973988517	0.787845703102159
Arteria	iPSC-CVPC	IGF2BP3	IGF2BP3_HepG2	HepG2	4.5	0.993310371329078	-0.00968351991884634	1
Arteria	iPSC-CVPC	IGF2BP3	IGF2BP3_HepG2	HepG2	1	1.29863978775447	0.377001316477361	5.46573343000695e-06
Arteria	iPSC-CVPC	IGF2BP3	IGF2BP3_HepG2	HepG2	1.5	1.2966562905081	0.374796109740387	8.75311446062725e-06
Arteria	iPSC-CVPC	IGF2BP3	IGF2BP3_HepG2	HepG2	2	1.26457402365889	0.338651489701718	0.000154165985710622
Arteria	iPSC-CVPC	IGF2BP3	IGF2BP3_HepG2	HepG2	2.5	1.23817418714974	0.308214288106164	0.00181020372032605
Arteria	iPSC-CVPC	IGF2BP3	IGF2BP3_HepG2	HepG2	3	1.20318673154353	0.266860562518894	0.0186505445536485
Arteria	iPSC-CVPC	IGF2BP3	IGF2BP3_HepG2	HepG2	0	1.38976697621177	0.474843004929979	3.49183423759995e-08
Arteria	iPSC-CVPC	IGF2BP3	IGF2BP3_HepG2	HepG2	0.5	1.29436446950795	0.372243911236357	8.72585648676814e-06
Arteria	iPSC-CVPC	IGF2BP3	IGF2BP3_HepG2	HepG2	5	1.02483761731175	0.0353953367963796	0.828810576195059
Arteria	iPSC-CVPC	KHDRBS1	KHDRBS1_K562	K562	0	1.5843473066387	0.663888624964613	3.61215598889659e-18
Arteria	iPSC-CVPC	KHDRBS1	KHDRBS1_K562	K562	4	1.00873803290868	0.0125515582954167	0.923187782132236
Arteria	iPSC-CVPC	KHDRBS1	KHDRBS1_K562	K562	4.5	1.04343819150437	0.0613451443874274	0.697756064485655
Arteria	iPSC-CVPC	KHDRBS1	KHDRBS1_K562	K562	5.5	0.879742242160037	-0.184847207988683	0.401037169994758
Arteria	iPSC-CVPC	KHDRBS1	KHDRBS1_K562	K562	6	0.80571975375764	-0.311649968503422	0.20904863840797
Arteria	iPSC-CVPC	KHDRBS1	KHDRBS1_K562	K562	1.5	1.32751884871247	0.408732345210945	3.70902437027779e-08
Arteria	iPSC-CVPC	KHDRBS1	KHDRBS1_K562	K562	2	1.34471347402188	0.427298802042763	4.63129542823585e-08
Arteria	iPSC-CVPC	KHDRBS1	KHDRBS1_K562	K562	1	1.34174960064754	0.424115458713619	5.73436920952614e-09
Arteria	iPSC-CVPC	KHDRBS1	KHDRBS1_K562	K562	0.5	1.38480924754301	0.469687263944783	1.62204630927063e-10
Arteria	iPSC-CVPC	KHDRBS1	KHDRBS1_K562	K562	3	1.29835728359251	0.376687440609262	0.000147681475440256
Arteria	iPSC-CVPC	KHDRBS1	KHDRBS1_K562	K562	2.5	1.32539370354573	0.406420970833817	2.3507736572532e-06
Arteria	iPSC-CVPC	KHDRBS1	KHDRBS1_K562	K562	3.5	1.16021878721828	0.214396885932059	0.0690873849584099
Arteria	iPSC-CVPC	KHDRBS1	KHDRBS1_K562	K562	5	0.874272231811824	-0.193845517299385	0.342445698050007
Arteria	iPSC-CVPC	KHSRP	KHSRP_HepG2	HepG2	5	0.987886900428646	-0.0175822125213653	1
Arteria	iPSC-CVPC	KHSRP	KHSRP_HepG2	HepG2	6	0.886765551477004	-0.173375368523608	0.511167607069211
Arteria	iPSC-CVPC	KHSRP	KHSRP_HepG2	HepG2	3.5	1.25370843209477	0.326201867692962	0.00720289613496928
Arteria	iPSC-CVPC	KHSRP	KHSRP_HepG2	HepG2	2.5	1.4145084300646	0.500300774808503	2.55024393255665e-08
Arteria	iPSC-CVPC	KHSRP	KHSRP_HepG2	HepG2	3	1.37932258856348	0.463959906086315	6.79743722908664e-06
Arteria	iPSC-CVPC	KHSRP	KHSRP_HepG2	HepG2	2	1.41435464027896	0.500143911958812	1.09260263631863e-09
Arteria	iPSC-CVPC	KHSRP	KHSRP_HepG2	HepG2	4.5	1.08421714769594	0.116653729505653	0.484967650797747
Arteria	iPSC-CVPC	KHSRP	KHSRP_HepG2	HepG2	1.5	1.3749813357904	0.459412035404291	3.79707556983698e-09
Arteria	iPSC-CVPC	KHSRP	KHSRP_HepG2	HepG2	0.5	1.51309697235136	0.597504450903796	1.50042107774006e-14
Arteria	iPSC-CVPC	KHSRP	KHSRP_HepG2	HepG2	5.5	0.943779148283311	-0.0834787977510048	0.76888500085701
Arteria	iPSC-CVPC	KHSRP	KHSRP_HepG2	HepG2	4	1.15384964859588	0.206455247071165	0.143148521760876
Arteria	iPSC-CVPC	KHSRP	KHSRP_HepG2	HepG2	0	1.61433812021967	0.690942780149582	1.03760730903791e-17
Arteria	iPSC-CVPC	KHSRP	KHSRP_HepG2	HepG2	1	1.36830330217394	0.45238805773977	3.09153402054755e-09
Arteria	iPSC-CVPC	KHSRP	KHSRP_K562	K562	1	1.29963589267212	0.378107492935947	9.94136437481168e-10
Arteria	iPSC-CVPC	KHSRP	KHSRP_K562	K562	3	1.27309659807344	0.348341889996725	4.72471495622964e-05
Arteria	iPSC-CVPC	KHSRP	KHSRP_K562	K562	2.5	1.33014038090033	0.41157851350179	3.22867693626317e-08
Arteria	iPSC-CVPC	KHSRP	KHSRP_K562	K562	3.5	1.12902764384104	0.175080810419273	0.0794995099953747
Arteria	iPSC-CVPC	KHSRP	KHSRP_K562	K562	5	0.838436531937906	-0.254226516254569	0.119404876672371
Arteria	iPSC-CVPC	KHSRP	KHSRP_K562	K562	5.5	0.833761382412759	-0.262293542951941	0.153380379834616
Arteria	iPSC-CVPC	KHSRP	KHSRP_K562	K562	6	0.753781837377417	-0.407781061680283	0.0454003353217451
Arteria	iPSC-CVPC	KHSRP	KHSRP_K562	K562	0	1.56127473542371	0.642724428768663	9.94570315371046e-24
Arteria	iPSC-CVPC	KHSRP	KHSRP_K562	K562	4	0.992045130562008	-0.0115223410524491	0.934796364502576
Arteria	iPSC-CVPC	KHSRP	KHSRP_K562	K562	2	1.34887577822132	0.431757492544158	1.38822087186952e-10
Arteria	iPSC-CVPC	KHSRP	KHSRP_K562	K562	4.5	0.934278244990949	-0.0980758202338095	0.509346756856484
Arteria	iPSC-CVPC	KHSRP	KHSRP_K562	K562	0.5	1.39917834929069	0.484579870463819	6.71929411622268e-15
Arteria	iPSC-CVPC	KHSRP	KHSRP_K562	K562	1.5	1.34577226790527	0.428434297198854	1.32033136149143e-11
Arteria	iPSC-CVPC	PABPC4	PABPC4_K562	K562	3	1.24672887141494	0.318147753543891	0.0745574260035131
Arteria	iPSC-CVPC	PABPC4	PABPC4_K562	K562	4	1.05678491753933	0.0796817816647443	0.727935564359668
Arteria	iPSC-CVPC	PABPC4	PABPC4_K562	K562	0	1.16931015550421	0.225657650535942	0.0961813917283266
Arteria	iPSC-CVPC	PABPC4	PABPC4_K562	K562	0.5	1.0615773926238	0.086209552481609	0.532335430554934
Arteria	iPSC-CVPC	PABPC4	PABPC4_K562	K562	5.5	1.31348728449368	0.393402234208354	0.25354869323418
Arteria	iPSC-CVPC	PABPC4	PABPC4_K562	K562	3.5	1.40457143558095	0.490130000852745	0.0142544034625511
Arteria	iPSC-CVPC	PABPC4	PABPC4_K562	K562	2	1.2848755781618	0.361628661785062	0.0101485645931026
Arteria	iPSC-CVPC	PABPC4	PABPC4_K562	K562	2.5	1.24907679537233	0.320862179025059	0.0363708915843936
Arteria	iPSC-CVPC	PABPC4	PABPC4_K562	K562	5	1.24878709214538	0.320527530357593	0.30324408416838
Arteria	iPSC-CVPC	PABPC4	PABPC4_K562	K562	6	1.19211957734071	0.253528954746413	0.478993149708589
Arteria	iPSC-CVPC	PABPC4	PABPC4_K562	K562	1	1.1129617437096	0.154404003183912	0.243032180226674
Arteria	iPSC-CVPC	PABPC4	PABPC4_K562	K562	4.5	1.19766857278872	0.260228730709076	0.317651368789928
Arteria	iPSC-CVPC	PABPC4	PABPC4_K562	K562	1.5	1.23971136605895	0.310004266397051	0.0189045335524777
Arteria	iPSC-CVPC	PABPN1	PABPN1_HepG2	HepG2	2.5	1.44840518846182	0.534465249942978	4.06149537703681e-06
Arteria	iPSC-CVPC	PABPN1	PABPN1_HepG2	HepG2	0.5	1.70585478409418	0.770494838224682	1.00253596704529e-13
Arteria	iPSC-CVPC	PABPN1	PABPN1_HepG2	HepG2	3.5	1.25245552849502	0.324759377904527	0.0385889703880614
Arteria	iPSC-CVPC	PABPN1	PABPN1_HepG2	HepG2	2	1.48610759166382	0.571538568326577	7.83710274529912e-08
Arteria	iPSC-CVPC	PABPN1	PABPN1_HepG2	HepG2	6	1.06439991339313	0.0900402980852178	0.742533437427494
Arteria	iPSC-CVPC	PABPN1	PABPN1_HepG2	HepG2	1	1.63296096397273	0.707490303602553	2.69440710873061e-12
Arteria	iPSC-CVPC	PABPN1	PABPN1_HepG2	HepG2	1.5	1.58599448746221	0.665387756587441	6.64538769563967e-11
Arteria	iPSC-CVPC	PABPN1	PABPN1_HepG2	HepG2	4.5	1.00157193801618	0.00226604660437644	1
Arteria	iPSC-CVPC	PABPN1	PABPN1_HepG2	HepG2	0	1.76258602898941	0.817693674854669	5.3738200453802e-14
Arteria	iPSC-CVPC	PABPN1	PABPN1_HepG2	HepG2	5	1.08646919969687	0.119647276153408	0.597592086258722
Arteria	iPSC-CVPC	PABPN1	PABPN1_HepG2	HepG2	5.5	1.03645048957872	0.0516512016906833	0.845084019303217
Arteria	iPSC-CVPC	PABPN1	PABPN1_HepG2	HepG2	4	1.02083264755665	0.0297463742182575	0.893207046089364
Arteria	iPSC-CVPC	PABPN1	PABPN1_HepG2	HepG2	3	1.41775769742654	0.503610989142288	0.000157138504895834
Arteria	iPSC-CVPC	PCBP1	PCBP1_HepG2	HepG2	3.5	1.196509880868	0.258832310809048	0.398126986311652
Arteria	iPSC-CVPC	PCBP1	PCBP1_HepG2	HepG2	1.5	1.40308039630434	0.488597677544042	0.0241490677606374
Arteria	iPSC-CVPC	PCBP1	PCBP1_HepG2	HepG2	2.5	1.35041727107045	0.433405260526479	0.0738522830045264
Arteria	iPSC-CVPC	PCBP1	PCBP1_HepG2	HepG2	2	1.43613829010943	0.522194677328815	0.0201992196314923
Arteria	iPSC-CVPC	PCBP1	PCBP1_HepG2	HepG2	5.5	0.802538353180188	-0.317357754838482	0.835058623281947
Arteria	iPSC-CVPC	PCBP1	PCBP1_HepG2	HepG2	0.5	1.33149960723423	0.413052002982394	0.0607397660642079
Arteria	iPSC-CVPC	PCBP1	PCBP1_HepG2	HepG2	1	1.41050703608831	0.496213862594445	0.0207406675558703
Arteria	iPSC-CVPC	PCBP1	PCBP1_HepG2	HepG2	3	1.39021257831094	0.475305503255295	0.0960936290652888
Arteria	iPSC-CVPC	PCBP1	PCBP1_HepG2	HepG2	4	0.935964627338894	-0.0954740874366597	1
Arteria	iPSC-CVPC	PCBP1	PCBP1_HepG2	HepG2	4.5	0.780458030449794	-0.357607042299752	0.621730129045872
Arteria	iPSC-CVPC	PCBP1	PCBP1_HepG2	HepG2	6	0.818012674036259	-0.289804898874851	1
Arteria	iPSC-CVPC	PCBP1	PCBP1_HepG2	HepG2	0	1.33053630395697	0.412007875128366	0.06103334386066
Arteria	iPSC-CVPC	PCBP1	PCBP1_HepG2	HepG2	5	1.0429283833885	0.0606400931619636	0.851458703150627
Arteria	iPSC-CVPC	PCBP1	PCBP1_K562	K562	0	1.28335479703163	0.359920073901041	0.0234597266181345
Arteria	iPSC-CVPC	PCBP1	PCBP1_K562	K562	1.5	1.23680520836455	0.306618299784422	0.0501690832878354
Arteria	iPSC-CVPC	PCBP1	PCBP1_K562	K562	2	1.23379628344468	0.303104205568135	0.0631424532798513
Arteria	iPSC-CVPC	PCBP1	PCBP1_K562	K562	2.5	1.21944277534108	0.286222058528763	0.11805802391416
Arteria	iPSC-CVPC	PCBP1	PCBP1_K562	K562	3.5	1.13361193300356	0.180926850025631	0.479369752790378
Arteria	iPSC-CVPC	PCBP1	PCBP1_K562	K562	5	0.665607528469143	-0.587256343464136	0.272337305036669
Arteria	iPSC-CVPC	PCBP1	PCBP1_K562	K562	5.5	0.748116113835263	-0.418665889141248	0.5431499577825
Arteria	iPSC-CVPC	PCBP1	PCBP1_K562	K562	6	0.740973576205255	-0.432505999262266	0.608283411895882
Arteria	iPSC-CVPC	PCBP1	PCBP1_K562	K562	1	1.25310459105006	0.325506835004456	0.035088270342987
Arteria	iPSC-CVPC	PCBP1	PCBP1_K562	K562	4	0.818119591864163	-0.289616344656424	0.407546221177817
Arteria	iPSC-CVPC	PCBP1	PCBP1_K562	K562	4.5	0.810751478110688	-0.302668345973761	0.474457466941468
Arteria	iPSC-CVPC	PCBP1	PCBP1_K562	K562	3	1.23202851614233	0.301035648582336	0.152400944892096
Arteria	iPSC-CVPC	PCBP1	PCBP1_K562	K562	0.5	1.16999424435821	0.226501432666545	0.154805489511471
Arteria	iPSC-CVPC	PCBP2	PCBP2_HepG2	HepG2	4	1.01894721405716	0.0270793154973562	0.837495159288093
Arteria	iPSC-CVPC	PCBP2	PCBP2_HepG2	HepG2	5	1.06947827934671	0.0969071822720164	0.591322835006116
Arteria	iPSC-CVPC	PCBP2	PCBP2_HepG2	HepG2	1	1.27052626360247	0.345426198277856	7.72040140028824e-06
Arteria	iPSC-CVPC	PCBP2	PCBP2_HepG2	HepG2	6	0.875848854051082	-0.191246170637459	0.503690272963032
Arteria	iPSC-CVPC	PCBP2	PCBP2_HepG2	HepG2	0	1.41177337907637	0.497508522658503	5.63012751511835e-10
Arteria	iPSC-CVPC	PCBP2	PCBP2_HepG2	HepG2	4.5	1.04996550024043	0.0703419246059197	0.679438038296166
Arteria	iPSC-CVPC	PCBP2	PCBP2_HepG2	HepG2	2.5	1.19565813737823	0.25780495307218	0.00547501142087321
Arteria	iPSC-CVPC	PCBP2	PCBP2_HepG2	HepG2	3	1.15609589050736	0.209261064812684	0.049311495678624
Arteria	iPSC-CVPC	PCBP2	PCBP2_HepG2	HepG2	3.5	1.08376344892118	0.116049896627277	0.354987431789199
Arteria	iPSC-CVPC	PCBP2	PCBP2_HepG2	HepG2	2	1.28379858533504	0.360418876345269	1.43316968458733e-05
Arteria	iPSC-CVPC	PCBP2	PCBP2_HepG2	HepG2	1.5	1.26759766116562	0.342096902930079	1.44775679365428e-05
Arteria	iPSC-CVPC	PCBP2	PCBP2_HepG2	HepG2	0.5	1.30202262533666	0.380754518532268	1.00323656960564e-06
Arteria	iPSC-CVPC	PCBP2	PCBP2_HepG2	HepG2	5.5	0.965982383363727	-0.0499312160390853	0.881577830007549
Arteria	iPSC-CVPC	PTBP1	PTBP1_HepG2	HepG2	1	1.34147938670241	0.423824886181964	2.17572743108983e-08
Arteria	iPSC-CVPC	PTBP1	PTBP1_HepG2	HepG2	5.5	0.810863276876808	-0.302469418916371	0.188236215414734
Arteria	iPSC-CVPC	PTBP1	PTBP1_HepG2	HepG2	3	1.15052067135494	0.202286904634015	0.0535339365107806
Arteria	iPSC-CVPC	PTBP1	PTBP1_HepG2	HepG2	5	0.90654474276921	-0.14154986854365	0.509281791879725
Arteria	iPSC-CVPC	PTBP1	PTBP1_HepG2	HepG2	3.5	1.03836411165086	0.0543124263174941	0.665470984521032
Arteria	iPSC-CVPC	PTBP1	PTBP1_HepG2	HepG2	0.5	1.42467382965972	0.510631660895132	2.816510566136e-11
Arteria	iPSC-CVPC	PTBP1	PTBP1_HepG2	HepG2	4	0.938726993309645	-0.0912224499646511	0.579307700489062
Arteria	iPSC-CVPC	PTBP1	PTBP1_HepG2	HepG2	1.5	1.33397171481762	0.415728076323865	7.89517295129182e-08
Arteria	iPSC-CVPC	PTBP1	PTBP1_HepG2	HepG2	0	1.6022192339389	0.680071567269971	1.40346667007555e-17
Arteria	iPSC-CVPC	PTBP1	PTBP1_HepG2	HepG2	6	0.729931854134513	-0.454166313485526	0.0847741627430849
Arteria	iPSC-CVPC	PTBP1	PTBP1_HepG2	HepG2	2	1.29291618502468	0.370628753594775	5.86971026156369e-06
Arteria	iPSC-CVPC	PTBP1	PTBP1_HepG2	HepG2	2.5	1.25374886181151	0.326248391118906	0.000294034046780555
Arteria	iPSC-CVPC	PTBP1	PTBP1_HepG2	HepG2	4.5	0.887162248269038	-0.172730119597214	0.353085259116332
Arteria	iPSC-CVPC	PTBP1	PTBP1_K562	K562	3.5	1.22811166104035	0.296441737829912	0.0426525567113128
Arteria	iPSC-CVPC	PTBP1	PTBP1_K562	K562	6	0.868653516812858	-0.203147256461087	0.612343817173518
Arteria	iPSC-CVPC	PTBP1	PTBP1_K562	K562	4	1.05683663512247	0.0797523834246905	0.66334694939479
Arteria	iPSC-CVPC	PTBP1	PTBP1_K562	K562	1.5	1.31546001114962	0.395567392484782	3.59345163022013e-05
Arteria	iPSC-CVPC	PTBP1	PTBP1_K562	K562	3	1.2769408186662	0.352691663180578	0.00529998944555703
Arteria	iPSC-CVPC	PTBP1	PTBP1_K562	K562	5	1.01587845831192	0.0227278055749386	0.935015495207246
Arteria	iPSC-CVPC	PTBP1	PTBP1_K562	K562	5.5	1.00352926788598	0.00508269345012131	1
Arteria	iPSC-CVPC	PTBP1	PTBP1_K562	K562	1	1.30136192194615	0.380022245978483	5.77867118565573e-05
Arteria	iPSC-CVPC	PTBP1	PTBP1_K562	K562	2	1.31592229688656	0.39607430274635	7.8142753998012e-05
Arteria	iPSC-CVPC	PTBP1	PTBP1_K562	K562	0.5	1.4180232427581	0.503881179923711	1.38526000251246e-07
Arteria	iPSC-CVPC	PTBP1	PTBP1_K562	K562	2.5	1.27111636280819	0.34609610615883	0.00180977530731185
Arteria	iPSC-CVPC	PTBP1	PTBP1_K562	K562	4.5	1.05316044889869	0.0747252475665466	0.720255678284567
Arteria	iPSC-CVPC	PTBP1	PTBP1_K562	K562	0	1.56139705857498	0.642837456980044	1.02565382417673e-10
Arteria	iPSC-CVPC	PUM1	PUM1_K562	K562	2.5	1.31761429675351	0.397928114202017	0.00405689320570722
Arteria	iPSC-CVPC	PUM1	PUM1_K562	K562	2	1.43862295431519	0.524688528689496	2.14057923024148e-05
Arteria	iPSC-CVPC	PUM1	PUM1_K562	K562	0.5	1.50883727364206	0.593437221259751	6.92394214478947e-07
Arteria	iPSC-CVPC	PUM1	PUM1_K562	K562	1	1.43475104348135	0.520800423664511	8.49514581731502e-06
Arteria	iPSC-CVPC	PUM1	PUM1_K562	K562	1.5	1.34116184788482	0.423483348391772	0.000376798827010684
Arteria	iPSC-CVPC	PUM1	PUM1_K562	K562	4.5	1.13091770746552	0.177493953774412	0.469890337870198
Arteria	iPSC-CVPC	PUM1	PUM1_K562	K562	3	1.29199218763006	0.369597346423909	0.0186929953496904
Arteria	iPSC-CVPC	PUM1	PUM1_K562	K562	3.5	1.15530356435044	0.208271979988144	0.254617857218228
Arteria	iPSC-CVPC	PUM1	PUM1_K562	K562	4	0.939469580879388	-0.0900816455623438	0.75379686541518
Arteria	iPSC-CVPC	PUM1	PUM1_K562	K562	5	0.977402591143577	-0.0329751656403709	1
Arteria	iPSC-CVPC	PUM1	PUM1_K562	K562	5.5	1.02704501742706	0.0384994192368117	0.909164487329953
Arteria	iPSC-CVPC	PUM1	PUM1_K562	K562	6	0.938749230090481	-0.0911882754776035	0.898831084711796
Arteria	iPSC-CVPC	PUM1	PUM1_K562	K562	0	1.6095713699221	0.686676548701183	4.80885619654661e-08
Arteria	iPSC-CVPC	PUM2	PUM2_K562	K562	4.5	1.37786530770592	0.462434865253955	0.0799345517092121
Arteria	iPSC-CVPC	PUM2	PUM2_K562	K562	5	1.51170346267391	0.596175166750017	0.0452695349049209
Arteria	iPSC-CVPC	PUM2	PUM2_K562	K562	2.5	1.6864452099837	0.753985448169957	5.82465078825754e-07
Arteria	iPSC-CVPC	PUM2	PUM2_K562	K562	5.5	1.61803040862411	0.694238721463172	0.0363705349498279
Arteria	iPSC-CVPC	PUM2	PUM2_K562	K562	0.5	1.44859387077518	0.534653176160831	7.64456930587459e-05
Arteria	iPSC-CVPC	PUM2	PUM2_K562	K562	4	1.23374684741502	0.303046398177493	0.209754101416883
Arteria	iPSC-CVPC	PUM2	PUM2_K562	K562	2	1.45570406004027	0.541717090077641	0.000121842045219793
Arteria	iPSC-CVPC	PUM2	PUM2_K562	K562	1	1.35996288393417	0.443567278023554	0.00087417877741002
Arteria	iPSC-CVPC	PUM2	PUM2_K562	K562	3	1.78207378360602	0.833557070327202	9.01876242714142e-07
Arteria	iPSC-CVPC	PUM2	PUM2_K562	K562	0	1.71530455964779	0.778464755805502	3.87159735028338e-08
Arteria	iPSC-CVPC	PUM2	PUM2_K562	K562	1.5	1.4012410936303	0.48670520320645	0.000337676016951923
Arteria	iPSC-CVPC	PUM2	PUM2_K562	K562	3.5	1.57531492744985	0.655640272328259	0.000982544914195357
Arteria	iPSC-CVPC	PUM2	PUM2_K562	K562	6	1.54939751637093	0.631707332198653	0.078926428191413
Arteria	iPSC-CVPC	QKI	QKI_HepG2	HepG2	2	1.40483851139234	0.490404299696322	5.93643998039299e-09
Arteria	iPSC-CVPC	QKI	QKI_HepG2	HepG2	2.5	1.38589104399786	0.4708138401138	3.32520020404544e-07
Arteria	iPSC-CVPC	QKI	QKI_HepG2	HepG2	3	1.38405105196713	0.468897159059482	9.07396077344108e-06
Arteria	iPSC-CVPC	QKI	QKI_HepG2	HepG2	4.5	1.17525027931877	0.232968023413383	0.168172745243998
Arteria	iPSC-CVPC	QKI	QKI_HepG2	HepG2	5	0.970765130010879	-0.042805807230497	0.891459191192701
Arteria	iPSC-CVPC	QKI	QKI_HepG2	HepG2	5.5	0.857254036617484	-0.222205302382254	0.364081952308327
Arteria	iPSC-CVPC	QKI	QKI_HepG2	HepG2	6	0.863410116557705	-0.211882097962298	0.445533016060421
Arteria	iPSC-CVPC	QKI	QKI_HepG2	HepG2	1.5	1.31152767755038	0.391248253537586	1.12648328711826e-06
Arteria	iPSC-CVPC	QKI	QKI_HepG2	HepG2	4	1.25732815595286	0.330361234626544	0.0221415428976001
Arteria	iPSC-CVPC	QKI	QKI_HepG2	HepG2	0.5	1.40066075414033	0.486107571339472	8.78254203986714e-10
Arteria	iPSC-CVPC	QKI	QKI_HepG2	HepG2	1	1.26250232209818	0.33628604139033	1.82818442728411e-05
Arteria	iPSC-CVPC	QKI	QKI_HepG2	HepG2	3.5	1.31126180833158	0.390955764790875	0.00154134307714968
Arteria	iPSC-CVPC	QKI	QKI_HepG2	HepG2	0	1.50520336580397	0.589958420550369	6.76612543120138e-13
Arteria	iPSC-CVPC	QKI	QKI_K652	K652	4	1.40495854462229	0.490527562225427	0.0324683884279923
Arteria	iPSC-CVPC	QKI	QKI_K652	K652	3	1.28902183366876	0.366276700517928	0.0334163400312151
Arteria	iPSC-CVPC	QKI	QKI_K652	K652	3.5	1.38580301709431	0.470722202310742	0.0161437463910341
Arteria	iPSC-CVPC	QKI	QKI_K652	K652	1	1.18716261310451	0.247517563498218	0.0562561697345741
Arteria	iPSC-CVPC	QKI	QKI_K652	K652	0.5	1.33093758917876	0.41244292144262	0.00163552226343786
Arteria	iPSC-CVPC	QKI	QKI_K652	K652	4.5	1.19028361336913	0.251305370886451	0.325903754119152
Arteria	iPSC-CVPC	QKI	QKI_K652	K652	2.5	1.24290622660726	0.313717453661504	0.0392745820054821
Arteria	iPSC-CVPC	QKI	QKI_K652	K652	5.5	0.945718416944757	-0.0805174028122901	1
Arteria	iPSC-CVPC	QKI	QKI_K652	K652	1.5	1.11996711928649	0.163456377337651	0.216316215125994
Arteria	iPSC-CVPC	QKI	QKI_K652	K652	2	1.16119126716841	0.21560562721482	0.118982121630859
Arteria	iPSC-CVPC	QKI	QKI_K652	K652	0	1.45349449283308	0.539525605235792	8.67304136304798e-05
Arteria	iPSC-CVPC	QKI	QKI_K652	K652	5	1.09345258858972	0.128890667400762	0.653996198351584
Arteria	iPSC-CVPC	QKI	QKI_K652	K652	6	0.992227989353398	-0.0112564406886135	1
Arteria	iPSC-CVPC	RBFOX2	RBFOX2_HepG2	HepG2	4	1.00434139816857	0.00624975706129667	0.960883349737209
Arteria	iPSC-CVPC	RBFOX2	RBFOX2_HepG2	HepG2	0.5	1.40155712254493	0.487030544750631	9.48231927322882e-11
Arteria	iPSC-CVPC	RBFOX2	RBFOX2_HepG2	HepG2	1	1.38621161212856	0.471147508892962	2.16496293275249e-10
Arteria	iPSC-CVPC	RBFOX2	RBFOX2_HepG2	HepG2	1.5	1.39444496183198	0.479690992911191	2.15435106986793e-10
Arteria	iPSC-CVPC	RBFOX2	RBFOX2_HepG2	HepG2	2	1.35221562764305	0.435325225678384	4.80579098942199e-08
Arteria	iPSC-CVPC	RBFOX2	RBFOX2_HepG2	HepG2	4.5	1.04376342617773	0.0617947554362172	0.692790057741859
Arteria	iPSC-CVPC	RBFOX2	RBFOX2_HepG2	HepG2	3	1.1680555981902	0.224108946584603	0.0277236064034918
Arteria	iPSC-CVPC	RBFOX2	RBFOX2_HepG2	HepG2	3.5	1.06805720291928	0.0949889168362856	0.424303294998363
Arteria	iPSC-CVPC	RBFOX2	RBFOX2_HepG2	HepG2	5	1.04205008231114	0.0594246171227452	0.747671006700042
Arteria	iPSC-CVPC	RBFOX2	RBFOX2_HepG2	HepG2	0	1.46647673664428	0.552354185180015	1.15943436623763e-12
Arteria	iPSC-CVPC	RBFOX2	RBFOX2_HepG2	HepG2	2.5	1.28025981385749	0.356436618137207	4.97414399316156e-05
Arteria	iPSC-CVPC	RBFOX2	RBFOX2_HepG2	HepG2	5.5	0.932497983779656	-0.100827488869874	0.66930422865843
Arteria	iPSC-CVPC	RBFOX2	RBFOX2_HepG2	HepG2	6	0.974000618986908	-0.0380054057326616	0.936358792728214
Arteria	iPSC-CVPC	RBFOX2	RBFOX2_K562	K562	2	1.30784448960162	0.387191006112349	2.39921047706026e-06
Arteria	iPSC-CVPC	RBFOX2	RBFOX2_K562	K562	4.5	0.968639126315917	-0.0459688158773255	0.816480691655773
Arteria	iPSC-CVPC	RBFOX2	RBFOX2_K562	K562	5	0.864867314016098	-0.209449280166031	0.320702029267906
Arteria	iPSC-CVPC	RBFOX2	RBFOX2_K562	K562	5.5	0.815662648661181	-0.293955506092819	0.212486622015114
Arteria	iPSC-CVPC	RBFOX2	RBFOX2_K562	K562	0	1.60802755842156	0.685292131676936	2.59764535273959e-17
Arteria	iPSC-CVPC	RBFOX2	RBFOX2_K562	K562	3	1.14778994333477	0.198858639018942	0.0581038501249457
Arteria	iPSC-CVPC	RBFOX2	RBFOX2_K562	K562	1.5	1.34471559734792	0.427301080081613	3.7755930230945e-08
Arteria	iPSC-CVPC	RBFOX2	RBFOX2_K562	K562	2.5	1.23426652630113	0.303653962278175	0.000832027427478616
Arteria	iPSC-CVPC	RBFOX2	RBFOX2_K562	K562	1	1.42301145897263	0.508947279388233	2.92387465665542e-11
Arteria	iPSC-CVPC	RBFOX2	RBFOX2_K562	K562	3.5	1.0787893119127	0.10941313327966	0.385879014813741
Arteria	iPSC-CVPC	RBFOX2	RBFOX2_K562	K562	4	0.957706296997977	-0.0623448072247397	0.723488623350805
Arteria	iPSC-CVPC	RBFOX2	RBFOX2_K562	K562	0.5	1.45459045317713	0.540613012692986	3.69938862360231e-12
Arteria	iPSC-CVPC	RBFOX2	RBFOX2_K562	K562	6	0.733002277837114	-0.448110413282432	0.0995172273738153
Arteria	iPSC-CVPC	RBM22	RBM22_K562	K562	5.5	1.11773220628605	0.160574579110514	0.604320693899571
Arteria	iPSC-CVPC	RBM22	RBM22_K562	K562	6	0.769694422672923	-0.37764230154083	0.557910596077303
Arteria	iPSC-CVPC	RBM22	RBM22_K562	K562	3	1.29139140973742	0.368926335504044	0.0421967073630173
Arteria	iPSC-CVPC	RBM22	RBM22_K562	K562	5	1.1582085152075	0.211895008746105	0.482147064502997
Arteria	iPSC-CVPC	RBM22	RBM22_K562	K562	4.5	1.14415406267459	0.194281327021627	0.472134916960801
Arteria	iPSC-CVPC	RBM22	RBM22_K562	K562	1	1.72339911633246	0.785256849255406	3.67421372582614e-09
Arteria	iPSC-CVPC	RBM22	RBM22_K562	K562	4	0.941912373728628	-0.086335242976397	0.857638038817311
Arteria	iPSC-CVPC	RBM22	RBM22_K562	K562	2	1.62205178782745	0.697819881730969	5.76099995829082e-07
Arteria	iPSC-CVPC	RBM22	RBM22_K562	K562	0	1.9523531703023	0.965214052366207	4.19984274467449e-11
Arteria	iPSC-CVPC	RBM22	RBM22_K562	K562	0.5	1.75495926514658	0.811437544117842	3.06448988203161e-09
Arteria	iPSC-CVPC	RBM22	RBM22_K562	K562	1.5	1.62836353206318	0.70342281714526	1.41095599370828e-07
Arteria	iPSC-CVPC	RBM22	RBM22_K562	K562	3.5	1.16951872631731	0.225914962287875	0.283576198570815
Arteria	iPSC-CVPC	RBM22	RBM22_K562	K562	2.5	1.54454457627817	0.627181508419383	4.72287590543558e-05
Arteria	iPSC-CVPC	RBM5	RBM5_HepG2	HepG2	5.5	0.985186435887332	-0.021531330035458	1
Arteria	iPSC-CVPC	RBM5	RBM5_HepG2	HepG2	3.5	1.08449759218769	0.117026849927901	0.468528728909617
Arteria	iPSC-CVPC	RBM5	RBM5_HepG2	HepG2	1.5	1.40283516800509	0.488345503418342	1.04244924001011e-06
Arteria	iPSC-CVPC	RBM5	RBM5_HepG2	HepG2	4.5	1.0887427886154	0.122663163036996	0.550124166638447
Arteria	iPSC-CVPC	RBM5	RBM5_HepG2	HepG2	0	1.48464952573809	0.570122400955013	3.76394925597415e-08
Arteria	iPSC-CVPC	RBM5	RBM5_HepG2	HepG2	6	0.887634657014735	-0.171962097330828	0.672173319425862
Arteria	iPSC-CVPC	RBM5	RBM5_HepG2	HepG2	2.5	1.35320458645278	0.436379972018011	0.000141120314429088
Arteria	iPSC-CVPC	RBM5	RBM5_HepG2	HepG2	3	1.20048018168993	0.26361158681393	0.0493140644621145
Arteria	iPSC-CVPC	RBM5	RBM5_HepG2	HepG2	2	1.41764793965807	0.50349929648972	1.33218573275012e-06
Arteria	iPSC-CVPC	RBM5	RBM5_HepG2	HepG2	5	1.08006727648542	0.111121179452576	0.610307481734366
Arteria	iPSC-CVPC	RBM5	RBM5_HepG2	HepG2	0.5	1.34249830053329	0.424920261906219	2.1599174185873e-05
Arteria	iPSC-CVPC	RBM5	RBM5_HepG2	HepG2	4	1.00163497287505	0.00235684109777829	1
Arteria	iPSC-CVPC	RBM5	RBM5_HepG2	HepG2	1	1.32505855856264	0.40605611837857	3.95927263945094e-05
Arteria	iPSC-CVPC	SFPQ	SFPQ_HepG2	HepG2	1	1.32272819207133	0.403516632109342	0.000378858400626376
Arteria	iPSC-CVPC	SFPQ	SFPQ_HepG2	HepG2	0.5	1.43262043161334	0.518656422603986	6.66870034202591e-06
Arteria	iPSC-CVPC	SFPQ	SFPQ_HepG2	HepG2	1.5	1.31798027270397	0.398328776502907	0.00053490542082905
Arteria	iPSC-CVPC	SFPQ	SFPQ_HepG2	HepG2	3	1.40217002220446	0.487661296081134	0.00115421094815552
Arteria	iPSC-CVPC	SFPQ	SFPQ_HepG2	HepG2	5.5	0.927554614361273	-0.108495864853657	0.827397269459846
Arteria	iPSC-CVPC	SFPQ	SFPQ_HepG2	HepG2	6	0.908524238686938	-0.13840308998552	0.806778523616577
Arteria	iPSC-CVPC	SFPQ	SFPQ_HepG2	HepG2	0	1.54412075021202	0.626785575740999	1.49974474148631e-07
Arteria	iPSC-CVPC	SFPQ	SFPQ_HepG2	HepG2	5	1.06577444846165	0.0919021505585374	0.69486351380986
Arteria	iPSC-CVPC	SFPQ	SFPQ_HepG2	HepG2	3.5	1.24270661208495	0.313485733839686	0.0718154372486436
Arteria	iPSC-CVPC	SFPQ	SFPQ_HepG2	HepG2	2	1.4345668622829	0.520615210794608	1.4566010112761e-05
Arteria	iPSC-CVPC	SFPQ	SFPQ_HepG2	HepG2	2.5	1.39174483895936	0.476894733233178	0.000292083248742256
Arteria	iPSC-CVPC	SFPQ	SFPQ_HepG2	HepG2	4	1.0143521990978	0.0205586658211892	0.940177952047448
Arteria	iPSC-CVPC	SFPQ	SFPQ_HepG2	HepG2	4.5	1.13069482193962	0.177209593973815	0.437993070494055
Arteria	iPSC-CVPC	SRSF1	SRSF1_HepG2	HepG2	4	0.916358238923161	-0.126016382503271	0.382703347822358
Arteria	iPSC-CVPC	SRSF1	SRSF1_HepG2	HepG2	4.5	0.936162772649503	-0.0951686987563178	0.560957770712429
Arteria	iPSC-CVPC	SRSF1	SRSF1_HepG2	HepG2	1.5	1.23923216305398	0.30944649345923	1.32595015384184e-05
Arteria	iPSC-CVPC	SRSF1	SRSF1_HepG2	HepG2	2.5	1.14442581803402	0.194623950073184	0.0206570570174732
Arteria	iPSC-CVPC	SRSF1	SRSF1_HepG2	HepG2	3.5	0.982792174732136	-0.0250417242854594	0.844005475698746
Arteria	iPSC-CVPC	SRSF1	SRSF1_HepG2	HepG2	3	1.07148308580215	0.0996090761255541	0.309833058914288
Arteria	iPSC-CVPC	SRSF1	SRSF1_HepG2	HepG2	5	0.981841433887822	-0.0264380449045469	0.904367872236276
Arteria	iPSC-CVPC	SRSF1	SRSF1_HepG2	HepG2	1	1.28735072327656	0.364405152082741	1.59205170985427e-07
Arteria	iPSC-CVPC	SRSF1	SRSF1_HepG2	HepG2	0.5	1.29997776438492	0.378486946726073	6.57034652517015e-08
Arteria	iPSC-CVPC	SRSF1	SRSF1_HepG2	HepG2	2	1.16928227047361	0.225623245570876	0.00281902258104505
Arteria	iPSC-CVPC	SRSF1	SRSF1_HepG2	HepG2	6	0.849513799453044	-0.23529071223269	0.331186805231495
Arteria	iPSC-CVPC	SRSF1	SRSF1_HepG2	HepG2	0	1.35485625930335	0.438139799925786	1.41326183268497e-09
Arteria	iPSC-CVPC	SRSF1	SRSF1_HepG2	HepG2	5.5	0.89535858583114	-0.159462505926469	0.463377255800139
Arteria	iPSC-CVPC	SRSF7	SRSF7_HepG2	HepG2	2.5	1.33689266710956	0.418883642810001	0.00290565872869749
Arteria	iPSC-CVPC	SRSF7	SRSF7_HepG2	HepG2	3.5	1.42285864334541	0.508792341643472	0.00447624305865268
Arteria	iPSC-CVPC	SRSF7	SRSF7_HepG2	HepG2	4.5	1.38458978260342	0.469458607129924	0.0461706386579557
Arteria	iPSC-CVPC	SRSF7	SRSF7_HepG2	HepG2	5.5	1.36937059852656	0.453512942067812	0.134930056965105
Arteria	iPSC-CVPC	SRSF7	SRSF7_HepG2	HepG2	3	1.36677374915656	0.450774444125547	0.00429795931169459
Arteria	iPSC-CVPC	SRSF7	SRSF7_HepG2	HepG2	6	1.5737037893725	0.654164014912077	0.0394491798550249
Arteria	iPSC-CVPC	SRSF7	SRSF7_HepG2	HepG2	2	1.33193236980546	0.413520829989253	0.00124893036055663
Arteria	iPSC-CVPC	SRSF7	SRSF7_HepG2	HepG2	0.5	1.46025204976847	0.546217409904332	1.00239198465521e-05
Arteria	iPSC-CVPC	SRSF7	SRSF7_HepG2	HepG2	1	1.43954014394805	0.525608021389877	1.54503028486318e-05
Arteria	iPSC-CVPC	SRSF7	SRSF7_HepG2	HepG2	1.5	1.43642070435293	0.522478353055349	1.70969806500326e-05
Arteria	iPSC-CVPC	SRSF7	SRSF7_HepG2	HepG2	5	1.33831212594077	0.420414625719441	0.120640195071543
Arteria	iPSC-CVPC	SRSF7	SRSF7_HepG2	HepG2	0	1.51172351931695	0.596194307691486	4.35079128016998e-06
Arteria	iPSC-CVPC	SRSF7	SRSF7_HepG2	HepG2	4	1.27976512371355	0.355879055579234	0.0976148638437794
Arteria	iPSC-CVPC	SRSF7	SRSF7_K562	K562	1.5	1.35679964800329	0.440207700733111	2.58712401554738e-05
Arteria	iPSC-CVPC	SRSF7	SRSF7_K562	K562	2.5	1.27977236033444	0.355887213488339	0.00358521610829467
Arteria	iPSC-CVPC	SRSF7	SRSF7_K562	K562	3.5	1.22773795670036	0.296002670715767	0.069545397329919
Arteria	iPSC-CVPC	SRSF7	SRSF7_K562	K562	2	1.32319669510255	0.40402753626246	0.000270552564691728
Arteria	iPSC-CVPC	SRSF7	SRSF7_K562	K562	0.5	1.34311616665572	0.425584089434245	5.12779338739349e-05
Arteria	iPSC-CVPC	SRSF7	SRSF7_K562	K562	3	1.31519581429883	0.395277612663306	0.00426234776821481
Arteria	iPSC-CVPC	SRSF7	SRSF7_K562	K562	5	1.16226398176885	0.216937781251379	0.370913722136878
Arteria	iPSC-CVPC	SRSF7	SRSF7_K562	K562	4	1.07024622965733	0.0979427531108614	0.585394704884495
Arteria	iPSC-CVPC	SRSF7	SRSF7_K562	K562	5.5	1.15400384531737	0.206648031272004	0.428647799275351
Arteria	iPSC-CVPC	SRSF7	SRSF7_K562	K562	6	1.30274077365848	0.381550037272406	0.183573082298876
Arteria	iPSC-CVPC	SRSF7	SRSF7_K562	K562	0	1.54447810236299	0.627119416555534	1.38526528839535e-08
Arteria	iPSC-CVPC	SRSF7	SRSF7_K562	K562	1	1.38346934973066	0.468290681908541	5.53689907762933e-06
Arteria	iPSC-CVPC	SRSF7	SRSF7_K562	K562	4.5	1.23909577057393	0.309287698691102	0.15731693535186
Arteria	iPSC-CVPC	SRSF9	SRSF9_HepG2	HepG2	2	1.32536151524243	0.406385933343203	6.10650678938824e-05
Arteria	iPSC-CVPC	SRSF9	SRSF9_HepG2	HepG2	4	1.08127706912617	0.112736250210869	0.532849497144113
Arteria	iPSC-CVPC	SRSF9	SRSF9_HepG2	HepG2	5.5	1.21373916360785	0.27945841516743	0.240398597800009
Arteria	iPSC-CVPC	SRSF9	SRSF9_HepG2	HepG2	2.5	1.2391036072814	0.309296823040903	0.00545177894926848
Arteria	iPSC-CVPC	SRSF9	SRSF9_HepG2	HepG2	6	1.29296157382506	0.370679399606172	0.186306903074417
Arteria	iPSC-CVPC	SRSF9	SRSF9_HepG2	HepG2	1.5	1.36852408740648	0.452620827816536	2.59112973232569e-06
Arteria	iPSC-CVPC	SRSF9	SRSF9_HepG2	HepG2	0.5	1.44102090517099	0.527091265122479	3.63541070260502e-08
Arteria	iPSC-CVPC	SRSF9	SRSF9_HepG2	HepG2	1	1.42633293884913	0.512310779230795	6.60458268505725e-08
Arteria	iPSC-CVPC	SRSF9	SRSF9_HepG2	HepG2	5	1.21565718849178	0.281736450664518	0.219877684705168
Arteria	iPSC-CVPC	SRSF9	SRSF9_HepG2	HepG2	0	1.51620066390939	0.600460701839585	1.84069382139198e-09
Arteria	iPSC-CVPC	SRSF9	SRSF9_HepG2	HepG2	3.5	1.11424267913021	0.156063482092827	0.309378491067715
Arteria	iPSC-CVPC	SRSF9	SRSF9_HepG2	HepG2	4.5	1.0657076525709	0.0918117288746528	0.665987958623184
Arteria	iPSC-CVPC	SRSF9	SRSF9_HepG2	HepG2	3	1.24450366224178	0.315570475791252	0.0132572202693219
Arteria	iPSC-CVPC	TAF15	TAF15_HepG2	HepG2	5.5	1.06882239773162	0.0960221456695186	0.612919373570232
Arteria	iPSC-CVPC	TAF15	TAF15_HepG2	HepG2	0	1.42533561112304	0.511301657870423	8.14535556362166e-11
Arteria	iPSC-CVPC	TAF15	TAF15_HepG2	HepG2	5	1.09734309250527	0.134014665639553	0.472212546911264
Arteria	iPSC-CVPC	TAF15	TAF15_HepG2	HepG2	2	1.30750078691911	0.386811814758221	1.88110221651245e-06
Arteria	iPSC-CVPC	TAF15	TAF15_HepG2	HepG2	4.5	1.10519874822444	0.144305833231716	0.388901864710157
Arteria	iPSC-CVPC	TAF15	TAF15_HepG2	HepG2	3.5	1.27512861609093	0.350642772133771	0.0031783642098066
Arteria	iPSC-CVPC	TAF15	TAF15_HepG2	HepG2	2.5	1.33773284730386	0.419790030514079	2.09869342002371e-06
Arteria	iPSC-CVPC	TAF15	TAF15_HepG2	HepG2	6	1.03011190220496	0.0428010674930588	0.870855728876197
Arteria	iPSC-CVPC	TAF15	TAF15_HepG2	HepG2	1.5	1.29303750253452	0.370764118872801	1.46145018594782e-06
Arteria	iPSC-CVPC	TAF15	TAF15_HepG2	HepG2	1	1.26570491104913	0.339941091188703	6.80739273966006e-06
Arteria	iPSC-CVPC	TAF15	TAF15_HepG2	HepG2	3	1.35019865486109	0.433171686756322	2.11300626684562e-05
Arteria	iPSC-CVPC	TAF15	TAF15_HepG2	HepG2	0.5	1.32231431134012	0.403065143195615	1.29958063156358e-07
Arteria	iPSC-CVPC	TAF15	TAF15_HepG2	HepG2	4	1.14597593833708	0.196576752640887	0.162662784693186
Arteria	iPSC-CVPC	TAF15	TAF15_K562	K562	0.5	1.2932400664378	0.370990110036963	0.000355632211548515
Arteria	iPSC-CVPC	TAF15	TAF15_K562	K562	2.5	1.34066234522216	0.422945930596447	0.000415400675017975
Arteria	iPSC-CVPC	TAF15	TAF15_K562	K562	3.5	1.1640853467586	0.219196835592901	0.1808686798813
Arteria	iPSC-CVPC	TAF15	TAF15_K562	K562	6	1.08391405077001	0.116250362370759	0.659826702212894
Arteria	iPSC-CVPC	TAF15	TAF15_K562	K562	0	1.29305450198504	0.370783085733166	0.000568157252161994
Arteria	iPSC-CVPC	TAF15	TAF15_K562	K562	4	1.04830845601429	0.0680632803160003	0.734632011736195
Arteria	iPSC-CVPC	TAF15	TAF15_K562	K562	5.5	1.21332668193889	0.278968040944511	0.280083497881433
Arteria	iPSC-CVPC	TAF15	TAF15_K562	K562	3	1.34690684895405	0.429650078566331	0.00169076773220162
Arteria	iPSC-CVPC	TAF15	TAF15_K562	K562	5	1.04557971992466	0.0643030639890418	0.789742203396201
Arteria	iPSC-CVPC	TAF15	TAF15_K562	K562	1.5	1.25443642630705	0.327039358132033	0.00178803967145584
Arteria	iPSC-CVPC	TAF15	TAF15_K562	K562	2	1.29801917612062	0.376311696965525	0.000640682031171346
Arteria	iPSC-CVPC	TAF15	TAF15_K562	K562	1	1.30679153232115	0.386029011619661	0.000160445530320438
Arteria	iPSC-CVPC	TAF15	TAF15_K562	K562	4.5	1.11430020114931	0.156137958318934	0.482963700692593
Arteria	iPSC-CVPC	TARDBP	TARDBP_K562	K562	4	1.1322468162063	0.179188482642749	0.214896021150605
Arteria	iPSC-CVPC	TARDBP	TARDBP_K562	K562	4.5	1.13792643500784	0.186407292899393	0.258293558046547
Arteria	iPSC-CVPC	TARDBP	TARDBP_K562	K562	5	1.04079891250435	0.0576913597457815	0.786315581785938
Arteria	iPSC-CVPC	TARDBP	TARDBP_K562	K562	5.5	0.966074333077032	-0.0497938956443291	0.880737422602009
Arteria	iPSC-CVPC	TARDBP	TARDBP_K562	K562	6	0.94944003837027	-0.0748512046520739	0.866281692930011
Arteria	iPSC-CVPC	TARDBP	TARDBP_K562	K562	0	1.52796516427997	0.611611652082148	6.11360071117495e-14
Arteria	iPSC-CVPC	TARDBP	TARDBP_K562	K562	0.5	1.40284161470139	0.488352133274526	6.02242984596865e-10
Arteria	iPSC-CVPC	TARDBP	TARDBP_K562	K562	1	1.35409864797822	0.437332845090735	2.02566890198695e-08
Arteria	iPSC-CVPC	TARDBP	TARDBP_K562	K562	1.5	1.34830508572479	0.431146977129415	5.83920058268156e-08
Arteria	iPSC-CVPC	TARDBP	TARDBP_K562	K562	2	1.34769263942368	0.430491506801389	2.6357064194612e-07
Arteria	iPSC-CVPC	TARDBP	TARDBP_K562	K562	2.5	1.33680526164971	0.418789316953546	5.65281263469506e-06
Arteria	iPSC-CVPC	TARDBP	TARDBP_K562	K562	3	1.32573428070128	0.406791642471677	0.000120644863798435
Arteria	iPSC-CVPC	TARDBP	TARDBP_K562	K562	3.5	1.23702816062573	0.306878343267108	0.0131417544136765
Arteria	iPSC-CVPC	TIA1	TIA1_HepG2	HepG2	0.5	1.37437461705589	0.458775297099966	4.45890839579362e-09
Arteria	iPSC-CVPC	TIA1	TIA1_HepG2	HepG2	3.5	1.13843961515895	0.187057770419549	0.132868085005152
Arteria	iPSC-CVPC	TIA1	TIA1_HepG2	HepG2	5	1.05011058430754	0.0705412622070763	0.685778422545744
Arteria	iPSC-CVPC	TIA1	TIA1_HepG2	HepG2	4	0.95435758745596	-0.0673981651469414	0.679829745812592
Arteria	iPSC-CVPC	TIA1	TIA1_HepG2	HepG2	3	1.2499043356153	0.32181767903544	0.00241520131047103
Arteria	iPSC-CVPC	TIA1	TIA1_HepG2	HepG2	6	0.968789609441666	-0.0457447031079776	0.93313099772466
Arteria	iPSC-CVPC	TIA1	TIA1_HepG2	HepG2	0	1.53828936695293	0.621326913573232	1.66002203541447e-14
Arteria	iPSC-CVPC	TIA1	TIA1_HepG2	HepG2	1	1.32889998249901	0.410232526598591	1.22203668209489e-07
Arteria	iPSC-CVPC	TIA1	TIA1_HepG2	HepG2	2	1.36994002406751	0.45411273342345	5.06109774327797e-08
Arteria	iPSC-CVPC	TIA1	TIA1_HepG2	HepG2	2.5	1.28710526874989	0.364130052387452	7.38168575112174e-05
Arteria	iPSC-CVPC	TIA1	TIA1_HepG2	HepG2	5.5	1.0245313200255	0.0349640883557948	0.880976454504427
Arteria	iPSC-CVPC	TIA1	TIA1_HepG2	HepG2	4.5	0.985212746937893	-0.0214928009673401	0.952648724196423
Arteria	iPSC-CVPC	TIA1	TIA1_HepG2	HepG2	1.5	1.35210952513175	0.435212019197425	3.48268649266969e-08
Arteria	iPSC-CVPC	TIA1	TIA1_K562	K562	6	0.902913424580687	-0.147340432669596	0.515258477787316
Arteria	iPSC-CVPC	TIA1	TIA1_K562	K562	0.5	1.46692269062993	0.552792840483844	3.77570799893074e-16
Arteria	iPSC-CVPC	TIA1	TIA1_K562	K562	4	1.03554774070907	0.0503940660611308	0.68945158258246
Arteria	iPSC-CVPC	TIA1	TIA1_K562	K562	3	1.35075591022267	0.433766994480825	2.15345093541352e-06
Arteria	iPSC-CVPC	TIA1	TIA1_K562	K562	3.5	1.22346947278658	0.290978104679374	0.00687016346166144
Arteria	iPSC-CVPC	TIA1	TIA1_K562	K562	5	0.942868420146109	-0.0848716419590925	0.641212260466401
Arteria	iPSC-CVPC	TIA1	TIA1_K562	K562	2	1.43508879422413	0.521140004513245	5.77399331102934e-13
Arteria	iPSC-CVPC	TIA1	TIA1_K562	K562	1.5	1.49735844958323	0.582419626562284	1.429723239356e-17
Arteria	iPSC-CVPC	TIA1	TIA1_K562	K562	0	1.66255231987674	0.73339974238165	1.59345065807649e-25
Arteria	iPSC-CVPC	TIA1	TIA1_K562	K562	1	1.46406772004758	0.549982286625538	2.4374995549099e-16
Arteria	iPSC-CVPC	TIA1	TIA1_K562	K562	2.5	1.39371676262088	0.478937400029319	1.76412563382864e-09
Arteria	iPSC-CVPC	TIA1	TIA1_K562	K562	5.5	0.896942095768138	-0.156913243348844	0.438514394727052
Arteria	iPSC-CVPC	TIA1	TIA1_K562	K562	4.5	1.01597401389626	0.0228635020092526	0.878044872701117
Arteria	iPSC-CVPC	TRA2A	TRA2A_HepG2	HepG2	5	1.97618572684963	0.982718541362549	0.00773547568185539
Arteria	iPSC-CVPC	TRA2A	TRA2A_HepG2	HepG2	0.5	1.42955317945162	0.51556428929681	0.00461521121062428
Arteria	iPSC-CVPC	TRA2A	TRA2A_HepG2	HepG2	1	1.44303133020073	0.529102623068575	0.0028898967669339
Arteria	iPSC-CVPC	TRA2A	TRA2A_HepG2	HepG2	1.5	1.28237917405783	0.358822901310449	0.0504649042099745
Arteria	iPSC-CVPC	TRA2A	TRA2A_HepG2	HepG2	2	1.26711850491565	0.341551456175026	0.0698910473381889
Arteria	iPSC-CVPC	TRA2A	TRA2A_HepG2	HepG2	2.5	1.24305811527297	0.31389374663672	0.134946221389337
Arteria	iPSC-CVPC	TRA2A	TRA2A_HepG2	HepG2	4	1.55392866212427	0.635920273911708	0.0338931893685241
Arteria	iPSC-CVPC	TRA2A	TRA2A_HepG2	HepG2	4.5	1.76825713789032	0.822328085014838	0.0140967603208585
Arteria	iPSC-CVPC	TRA2A	TRA2A_HepG2	HepG2	3	1.26532612772536	0.339509275996803	0.142620753607102
Arteria	iPSC-CVPC	TRA2A	TRA2A_HepG2	HepG2	3.5	1.34058431024481	0.422861954230721	0.107996949829318
Arteria	iPSC-CVPC	TRA2A	TRA2A_HepG2	HepG2	5.5	1.73012905876937	0.790879659539383	0.055893842546149
Arteria	iPSC-CVPC	TRA2A	TRA2A_HepG2	HepG2	6	1.58811481262751	0.667315215768495	0.171859052075798
Arteria	iPSC-CVPC	TRA2A	TRA2A_HepG2	HepG2	0	1.43167660800447	0.517705648525436	0.00669593454108409
Arteria	iPSC-CVPC	TRA2A	TRA2A_K562	K562	6	0.973373133684881	-0.0389351399077814	1
Arteria	iPSC-CVPC	TRA2A	TRA2A_K562	K562	0	1.64948062603486	0.722011832836111	1.09600771664567e-07
Arteria	iPSC-CVPC	TRA2A	TRA2A_K562	K562	5	1.37823715280118	0.462824153450495	0.118760622346794
Arteria	iPSC-CVPC	TRA2A	TRA2A_K562	K562	3	1.27836365328297	0.3542982949384	0.0404814828816725
Arteria	iPSC-CVPC	TRA2A	TRA2A_K562	K562	1.5	1.51382817182464	0.598201460459222	2.7397690013319e-06
Arteria	iPSC-CVPC	TRA2A	TRA2A_K562	K562	2	1.5469099839418	0.629389247530849	2.14940061473097e-06
Arteria	iPSC-CVPC	TRA2A	TRA2A_K562	K562	2.5	1.45011952268807	0.536171815883584	0.000275677923050368
Arteria	iPSC-CVPC	TRA2A	TRA2A_K562	K562	5.5	1.29495032573333	0.372896757222491	0.266738885200206
Arteria	iPSC-CVPC	TRA2A	TRA2A_K562	K562	4.5	1.36194156499176	0.445664804888065	0.0792790581309868
Arteria	iPSC-CVPC	TRA2A	TRA2A_K562	K562	0.5	1.5175551166325	0.601748915194875	3.58818101869636e-06
Arteria	iPSC-CVPC	TRA2A	TRA2A_K562	K562	1	1.47391384367424	0.559652195439303	9.59030240758689e-06
Arteria	iPSC-CVPC	TRA2A	TRA2A_K562	K562	3.5	1.33058948961919	0.412065542970553	0.036200174926962
Arteria	iPSC-CVPC	TRA2A	TRA2A_K562	K562	4	1.24956386964908	0.321424644578705	0.151078868655271
Arteria	iPSC-CVPC	U2AF2	U2AF2_HepG2	HepG2	3	1.19309432982435	0.254708111591256	0.010207804838515
Arteria	iPSC-CVPC	U2AF2	U2AF2_HepG2	HepG2	0	1.61026103102203	0.687294575070318	1.43816992506324e-19
Arteria	iPSC-CVPC	U2AF2	U2AF2_HepG2	HepG2	2	1.34938560843174	0.432302680292584	2.65853918086732e-08
Arteria	iPSC-CVPC	U2AF2	U2AF2_HepG2	HepG2	1.5	1.38395816193758	0.468800329912846	1.97475926044745e-10
Arteria	iPSC-CVPC	U2AF2	U2AF2_HepG2	HepG2	2.5	1.2847863873562	0.361528512322051	2.68223507217046e-05
Arteria	iPSC-CVPC	U2AF2	U2AF2_HepG2	HepG2	4	0.876635914755232	-0.189950309273856	0.195988666002646
Arteria	iPSC-CVPC	U2AF2	U2AF2_HepG2	HepG2	4.5	0.875070186506813	-0.192529359468758	0.270312415570016
Arteria	iPSC-CVPC	U2AF2	U2AF2_HepG2	HepG2	5	0.90643087972902	-0.141731084045503	0.490299982186713
Arteria	iPSC-CVPC	U2AF2	U2AF2_HepG2	HepG2	5.5	0.83589415066265	-0.258607829593644	0.237730433086622
Arteria	iPSC-CVPC	U2AF2	U2AF2_HepG2	HepG2	6	0.847128185287917	-0.239347803857934	0.349866972820611
Arteria	iPSC-CVPC	U2AF2	U2AF2_HepG2	HepG2	0.5	1.48691614394658	0.572323287522341	6.23240052358373e-15
Arteria	iPSC-CVPC	U2AF2	U2AF2_HepG2	HepG2	1	1.37933948150406	0.463977575058441	1.41946707558641e-10
Arteria	iPSC-CVPC	U2AF2	U2AF2_HepG2	HepG2	3.5	1.10162166404925	0.139628836325795	0.234184448270559
Arteria	iPSC-CVPC	U2AF2	U2AF2_K562	K562	6	0.886346830597976	-0.174056754038737	0.48779297339765
Arteria	iPSC-CVPC	U2AF2	U2AF2_K562	K562	0.5	1.63725129108024	0.71127576871016	1.53202527779776e-22
Arteria	iPSC-CVPC	U2AF2	U2AF2_K562	K562	1.5	1.55725364897514	0.639003952968349	1.52196551383439e-18
Arteria	iPSC-CVPC	U2AF2	U2AF2_K562	K562	1	1.55574172988519	0.637602577071933	5.18887263390888e-19
Arteria	iPSC-CVPC	U2AF2	U2AF2_K562	K562	3	1.43352791843914	0.519570001823977	6.80012473199882e-08
Arteria	iPSC-CVPC	U2AF2	U2AF2_K562	K562	3.5	1.26286732157679	0.336703075738317	0.00303769320532258
Arteria	iPSC-CVPC	U2AF2	U2AF2_K562	K562	4.5	1.07511594879589	0.104492259565606	0.512866349082382
Arteria	iPSC-CVPC	U2AF2	U2AF2_K562	K562	0	1.73736280895247	0.796899059759426	6.02448570717312e-26
Arteria	iPSC-CVPC	U2AF2	U2AF2_K562	K562	5.5	0.950373717822972	-0.0734331553088145	0.783155262931296
Arteria	iPSC-CVPC	U2AF2	U2AF2_K562	K562	2	1.50892517383123	0.593521265759116	8.69790703513743e-15
Arteria	iPSC-CVPC	U2AF2	U2AF2_K562	K562	2.5	1.46853406895661	0.554376735560355	3.64559054996798e-11
Arteria	iPSC-CVPC	U2AF2	U2AF2_K562	K562	5	0.950044615937371	-0.0739328280962374	0.70982710539278
Arteria	iPSC-CVPC	U2AF2	U2AF2_K562	K562	4	1.09805039527951	0.134944268688655	0.319809527453308
Heart	Arteria	CPEB4	CPEB4_K562	K562	0.5	1.03695892525747	0.0523587490200132	0.898779789637074
Heart	Arteria	CPEB4	CPEB4_K562	K562	1	1.20371713199411	0.267496405207685	0.520409024370893
Heart	Arteria	CPEB4	CPEB4_K562	K562	1.5	1.31760724271416	0.397920390504077	0.426968793260315
Heart	Arteria	CPEB4	CPEB4_K562	K562	0	1.01659659020349	0.0237472969212536	1
Heart	Arteria	CPEB4	CPEB4_K562	K562	5.5	1.61872660353328	0.694859340777298	0.466923354918357
Heart	Arteria	CPEB4	CPEB4_K562	K562	3	1.14078828769327	0.190031075031199	0.748723389562731
Heart	Arteria	CPEB4	CPEB4_K562	K562	4	1.88921782082074	0.917789049477064	0.221807337714855
Heart	Arteria	CPEB4	CPEB4_K562	K562	2	0.990720974252186	-0.0134492995786315	1
Heart	Arteria	CPEB4	CPEB4_K562	K562	6	2.51128233029105	1.3284242323584	0.335984353454302
Heart	Arteria	CPEB4	CPEB4_K562	K562	2.5	0.827229269931717	-0.273640861315928	1
Heart	Arteria	CPEB4	CPEB4_K562	K562	5	3.5747001856679	1.83782224642573	0.0578177970671829
Heart	Arteria	CPEB4	CPEB4_K562	K562	4.5	2.46436933308697	1.30121848780361	0.131270089429242
Heart	Arteria	CPEB4	CPEB4_K562	K562	3.5	1.42042901763404	0.50632673827433	0.475370447292801
Heart	Arteria	EIF4G2	EIF4G2_K562	K562	2	1.0763432090661	0.106138177398896	0.639702802187848
Heart	Arteria	EIF4G2	EIF4G2_K562	K562	5	1.52716077207393	0.610851950061628	0.194985075888483
Heart	Arteria	EIF4G2	EIF4G2_K562	K562	3	1.238226042657	0.308274707809149	0.284977463353409
Heart	Arteria	EIF4G2	EIF4G2_K562	K562	1.5	1.18483592462723	0.24468728940568	0.182155639548204
Heart	Arteria	EIF4G2	EIF4G2_K562	K562	4	1.85441760230068	0.890966165714663	0.00643464187914975
Heart	Arteria	EIF4G2	EIF4G2_K562	K562	2.5	1.24259167093475	0.313352289070788	0.198692652532482
Heart	Arteria	EIF4G2	EIF4G2_K562	K562	0	1.21591243083093	0.282039330627594	0.00358374135707379
Heart	Arteria	EIF4G2	EIF4G2_K562	K562	5.5	1.82333061094394	0.866576178230531	0.0833756311418358
Heart	Arteria	EIF4G2	EIF4G2_K562	K562	6	2.34238260035206	1.2279767421708	0.0520998249423745
Heart	Arteria	EIF4G2	EIF4G2_K562	K562	4.5	2.18064471044922	1.12475473273554	0.00177195428389547
Heart	Arteria	EIF4G2	EIF4G2_K562	K562	1	1.11141725662694	0.152400545848067	0.326802721213149
Heart	Arteria	EIF4G2	EIF4G2_K562	K562	0.5	1.13386902548073	0.181254002535611	0.132426068297175
Heart	Arteria	EIF4G2	EIF4G2_K562	K562	3.5	1.46074854471426	0.546707851983913	0.0747617818924947
Heart	Arteria	EWSR1	EWSR1_K562	K562	5	1.17025631805528	0.226824553985916	0.688658262270723
Heart	Arteria	EWSR1	EWSR1_K562	K562	4.5	1.84402991389679	0.882862059390087	0.0282768181391576
Heart	Arteria	EWSR1	EWSR1_K562	K562	1	1.32098577513149	0.401614931189017	0.0112694057667444
Heart	Arteria	EWSR1	EWSR1_K562	K562	1.5	1.23780211933781	0.30778069721131	0.111944088943543
Heart	Arteria	EWSR1	EWSR1_K562	K562	6	1.26492933946207	0.339056796417695	0.561655479231894
Heart	Arteria	EWSR1	EWSR1_K562	K562	5.5	1.23202094276687	0.301026780196054	0.635123084483774
Heart	Arteria	EWSR1	EWSR1_K562	K562	3.5	1.27827219784773	0.354195079376532	0.303210398142803
Heart	Arteria	EWSR1	EWSR1_K562	K562	4	1.65586785076945	0.72758754080404	0.0399883685183814
Heart	Arteria	EWSR1	EWSR1_K562	K562	2	1.14083606069401	0.19009148977153	0.398635074398127
Heart	Arteria	EWSR1	EWSR1_K562	K562	0	1.30285310267627	0.381674428505041	0.000331276490169416
Heart	Arteria	EWSR1	EWSR1_K562	K562	3	1.22726158994027	0.295442791206219	0.353342384565209
Heart	Arteria	EWSR1	EWSR1_K562	K562	0.5	1.36130436236484	0.444989662714945	0.000473348220944616
Heart	Arteria	EWSR1	EWSR1_K562	K562	2.5	1.22724546179653	0.295423831804193	0.272460832351502
Heart	Arteria	FMR1	FMR1_K562	K562	0	1.29371123130495	0.371515629961038	0.000322963183902232
Heart	Arteria	FMR1	FMR1_K562	K562	0.5	1.10766200474541	0.147517720315261	0.256002562724851
Heart	Arteria	FMR1	FMR1_K562	K562	1	1.14653848028469	0.197284775663823	0.225498695059632
Heart	Arteria	FMR1	FMR1_K562	K562	1.5	1.25248316944375	0.324791216974832	0.0896088406115584
Heart	Arteria	FMR1	FMR1_K562	K562	2	1.27719689449334	0.352980950109188	0.11601352129472
Heart	Arteria	FMR1	FMR1_K562	K562	2.5	1.31979813748144	0.400317286913437	0.118759126926682
Heart	Arteria	FMR1	FMR1_K562	K562	3	1.26750520924578	0.341991676489052	0.257023650627809
Heart	Arteria	FMR1	FMR1_K562	K562	3.5	1.34189199980884	0.424268563035741	0.208062746533366
Heart	Arteria	FMR1	FMR1_K562	K562	4	1.21244584264975	0.277920306651837	0.471525528954749
Heart	Arteria	FMR1	FMR1_K562	K562	4.5	1.39281741558925	0.478006147466362	0.251933928087312
Heart	Arteria	FMR1	FMR1_K562	K562	5	0.960198238655059	-0.0585958053040423	1
Heart	Arteria	FMR1	FMR1_K562	K562	5.5	0.752401755223073	-0.410424880464493	0.817349124121755
Heart	Arteria	FMR1	FMR1_K562	K562	6	0.569038470625627	-0.813401903683016	0.578117648027264
Heart	Arteria	FUBP3	FUBP3_HepG2	HepG2	1	1.29650869715071	0.374631884011583	0.0724709432189283
Heart	Arteria	FUBP3	FUBP3_HepG2	HepG2	1.5	1.12573947278039	0.170872986550694	0.501992171316726
Heart	Arteria	FUBP3	FUBP3_HepG2	HepG2	2.5	0.82088242045724	-0.284752503299988	0.597478464771102
Heart	Arteria	FUBP3	FUBP3_HepG2	HepG2	3	0.774016784091844	-0.36956324419787	0.541305635121457
Heart	Arteria	FUBP3	FUBP3_HepG2	HepG2	3.5	0.969353026599141	-0.0449059215376	1
Heart	Arteria	FUBP3	FUBP3_HepG2	HepG2	2	1.00020267464964	0.000292368085143529	1
Heart	Arteria	FUBP3	FUBP3_HepG2	HepG2	5	1.0584525688702	0.0819566210800981	0.79160548569389
Heart	Arteria	FUBP3	FUBP3_HepG2	HepG2	5.5	0.72804325202784	-0.457903933429733	1
Heart	Arteria	FUBP3	FUBP3_HepG2	HepG2	6	0	-Inf	0.421674189342765
Heart	Arteria	FUBP3	FUBP3_HepG2	HepG2	4	0.996981886181806	-0.00436080185173211	1
Heart	Arteria	FUBP3	FUBP3_HepG2	HepG2	4.5	1.31077943777944	0.390424946587828	0.502133510209046
Heart	Arteria	FUBP3	FUBP3_HepG2	HepG2	0	1.1297862240591	0.176049814528375	0.206437283162276
Heart	Arteria	FUBP3	FUBP3_HepG2	HepG2	0.5	1.26788458783047	0.342423426752833	0.0418707832580985
Heart	Arteria	FUS	FUS_HepG2	HepG2	0.5	1.40789321787516	0.493537916443994	1.17706565427034e-06
Heart	Arteria	FUS	FUS_HepG2	HepG2	4.5	1.96455417490881	0.974201952370092	0.00328166487460648
Heart	Arteria	FUS	FUS_HepG2	HepG2	1	1.34595146991471	0.428626392581522	0.000782607528280491
Heart	Arteria	FUS	FUS_HepG2	HepG2	1.5	1.2620423893221	0.335760368195057	0.0340228053607221
Heart	Arteria	FUS	FUS_HepG2	HepG2	6	0.702305414451764	-0.509829537158117	0.647670740678736
Heart	Arteria	FUS	FUS_HepG2	HepG2	5	1.56205596832018	0.643446146035207	0.113162054000005
Heart	Arteria	FUS	FUS_HepG2	HepG2	2	1.22361901320008	0.291154429495149	0.108487634086896
Heart	Arteria	FUS	FUS_HepG2	HepG2	0	1.34190120121569	0.42427845561914	3.54053975769373e-07
Heart	Arteria	FUS	FUS_HepG2	HepG2	3.5	1.55215902845492	0.634276378278663	0.0147362493152256
Heart	Arteria	FUS	FUS_HepG2	HepG2	2.5	1.33323047150116	0.414926196294097	0.0487236901555902
Heart	Arteria	FUS	FUS_HepG2	HepG2	3	1.41551971000148	0.501331837780161	0.0432464335814016
Heart	Arteria	FUS	FUS_HepG2	HepG2	5.5	0.945452942356668	-0.0809224415966931	1
Heart	Arteria	FUS	FUS_HepG2	HepG2	4	1.6686818662203	0.738708931468164	0.0139411684065642
Heart	Arteria	FUS	FUS_K562	K562	4.5	1.91687937310273	0.938759552810941	0.00128616085529302
Heart	Arteria	FUS	FUS_K562	K562	0	1.25787484166811	0.330988381448076	4.95485082223926e-06
Heart	Arteria	FUS	FUS_K562	K562	2	1.05095547034347	0.0717015426819791	0.64381230287453
Heart	Arteria	FUS	FUS_K562	K562	3.5	1.40011999762721	0.485550479000841	0.0429487667978558
Heart	Arteria	FUS	FUS_K562	K562	3	1.24682434862946	0.31825823404446	0.153573362199718
Heart	Arteria	FUS	FUS_K562	K562	4	1.63181882563657	0.706480889499923	0.00858667971582258
Heart	Arteria	FUS	FUS_K562	K562	5	1.50541630734047	0.590162504581282	0.101343970104224
Heart	Arteria	FUS	FUS_K562	K562	1	1.13289312949214	0.180011772170106	0.115887764911403
Heart	Arteria	FUS	FUS_K562	K562	2.5	1.11308396864376	0.154562430574316	0.413789610574431
Heart	Arteria	FUS	FUS_K562	K562	0.5	1.17790563253023	0.236223962823678	0.0089659784114486
Heart	Arteria	FUS	FUS_K562	K562	6	1.02904951648132	0.0413124044508171	1
Heart	Arteria	FUS	FUS_K562	K562	1.5	1.12229346072355	0.166449965584082	0.23487520577736
Heart	Arteria	FUS	FUS_K562	K562	5.5	0.99884670668969	-0.00166481073164923	1
Heart	Arteria	FXR2	FXR2_HepG2	HepG2	0.5	1.03928170485547	0.0555867602211867	0.765028433576705
Heart	Arteria	FXR2	FXR2_HepG2	HepG2	0	1.05083557989716	0.0715369541492508	0.60087691870613
Heart	Arteria	FXR2	FXR2_HepG2	HepG2	1.5	1.21901419836812	0.285714929728416	0.264424057370848
Heart	Arteria	FXR2	FXR2_HepG2	HepG2	2	1.31445470863899	0.394464432752741	0.158331434814849
Heart	Arteria	FXR2	FXR2_HepG2	HepG2	2.5	1.3495321704722	0.432459368525778	0.200298535810108
Heart	Arteria	FXR2	FXR2_HepG2	HepG2	3	1.42189007221313	0.50780993302816	0.180232940052987
Heart	Arteria	FXR2	FXR2_HepG2	HepG2	3.5	1.67689013529143	0.74578817103561	0.0678804471606304
Heart	Arteria	FXR2	FXR2_HepG2	HepG2	4	1.49732546075003	0.582387841687828	0.18818870296971
Heart	Arteria	FXR2	FXR2_HepG2	HepG2	4.5	1.78465482631643	0.835645066682321	0.0857627456193301
Heart	Arteria	FXR2	FXR2_HepG2	HepG2	5	2.66065381574801	1.4117808099491	0.00757993492571286
Heart	Arteria	FXR2	FXR2_HepG2	HepG2	5.5	1.77920910782077	0.831236078388888	0.216950841702204
Heart	Arteria	FXR2	FXR2_HepG2	HepG2	1	1.317501144963	0.39780421562471	0.0492008287350866
Heart	Arteria	FXR2	FXR2_HepG2	HepG2	6	1.62733246287402	0.702509022701265	0.438026637486899
Heart	Arteria	FXR2	FXR2_K562	K562	1	1.15927560333866	0.213223589901414	0.19421642617113
Heart	Arteria	FXR2	FXR2_K562	K562	1.5	1.32797376131698	0.409226641570496	0.0357248792137461
Heart	Arteria	FXR2	FXR2_K562	K562	0	1.2258503750681	0.293782897201096	0.00557411288141945
Heart	Arteria	FXR2	FXR2_K562	K562	0.5	1.13021903805186	0.176602396081244	0.176769624301694
Heart	Arteria	FXR2	FXR2_K562	K562	3	1.28354400644288	0.360132759714305	0.245933642023474
Heart	Arteria	FXR2	FXR2_K562	K562	2	1.17395732700487	0.231379967870998	0.310188057329566
Heart	Arteria	FXR2	FXR2_K562	K562	2.5	1.39467598072646	0.479929985641185	0.0721601015679975
Heart	Arteria	FXR2	FXR2_K562	K562	5.5	1.0090070969163	0.0129363217682949	1
Heart	Arteria	FXR2	FXR2_K562	K562	3.5	1.14141423155548	0.190822456270081	0.606862651681499
Heart	Arteria	FXR2	FXR2_K562	K562	4	1.191327382412	0.252569927122598	0.46538625343386
Heart	Arteria	FXR2	FXR2_K562	K562	6	1.62734319111609	0.702518533683787	0.253058001046757
Heart	Arteria	FXR2	FXR2_K562	K562	4.5	1.23572817413668	0.30536142531819	0.5028268661312
Heart	Arteria	FXR2	FXR2_K562	K562	5	1.01135069780756	0.0162833555550729	1
Heart	Arteria	HNRNPA1	HNRNPA1_HepG2	HepG2	5.5	1.56643421819081	0.647484185551561	0.109564104562537
Heart	Arteria	HNRNPA1	HNRNPA1_HepG2	HepG2	5	1.84443234947712	0.883176874495603	0.00665393350382366
Heart	Arteria	HNRNPA1	HNRNPA1_HepG2	HepG2	4	1.62294109838246	0.698610640912657	0.00479159080929627
Heart	Arteria	HNRNPA1	HNRNPA1_HepG2	HepG2	4.5	1.93498678027613	0.952323709989725	0.000440649402500694
Heart	Arteria	HNRNPA1	HNRNPA1_HepG2	HepG2	2.5	1.29723858522092	0.375443841239834	0.027205800179826
Heart	Arteria	HNRNPA1	HNRNPA1_HepG2	HepG2	6	1.51332806796389	0.597724777190013	0.210973940040999
Heart	Arteria	HNRNPA1	HNRNPA1_HepG2	HepG2	0.5	1.2368240916937	0.306640326435973	0.000153512907429993
Heart	Arteria	HNRNPA1	HNRNPA1_HepG2	HepG2	1	1.29242509389603	0.370080667544985	0.00028350026854552
Heart	Arteria	HNRNPA1	HNRNPA1_HepG2	HepG2	3	1.4076633871981	0.493302385339287	0.0124083764922627
Heart	Arteria	HNRNPA1	HNRNPA1_HepG2	HepG2	1.5	1.34169040591452	0.424051809108955	0.000600521399083966
Heart	Arteria	HNRNPA1	HNRNPA1_HepG2	HepG2	3.5	1.57647427206831	0.656701625547832	0.00202234724651997
Heart	Arteria	HNRNPA1	HNRNPA1_HepG2	HepG2	0	1.30446395675732	0.38345708204279	3.87183998873275e-09
Heart	Arteria	HNRNPA1	HNRNPA1_HepG2	HepG2	2	1.2728769876352	0.348093002189928	0.0165362332760421
Heart	Arteria	HNRNPA1	HNRNPA1_K562	K562	2	1.25017426780502	0.322129213106784	0.0733267860222813
Heart	Arteria	HNRNPA1	HNRNPA1_K562	K562	0	1.30438110840182	0.383365451525313	3.68929541276666e-06
Heart	Arteria	HNRNPA1	HNRNPA1_K562	K562	5	1.76448127909874	0.819244123404867	0.0400327282180789
Heart	Arteria	HNRNPA1	HNRNPA1_K562	K562	5.5	1.82737627141629	0.869773727022004	0.0617354192725143
Heart	Arteria	HNRNPA1	HNRNPA1_K562	K562	2.5	1.27265970432741	0.347846709490735	0.100767816008739
Heart	Arteria	HNRNPA1	HNRNPA1_K562	K562	3.5	1.75580444189296	0.812132169234188	0.00166394098969285
Heart	Arteria	HNRNPA1	HNRNPA1_K562	K562	4	1.82332463859449	0.866571452651419	0.00257975517952247
Heart	Arteria	HNRNPA1	HNRNPA1_K562	K562	4.5	2.10012064654224	1.07047220940023	0.000891484680317299
Heart	Arteria	HNRNPA1	HNRNPA1_K562	K562	6	2.34571210284927	1.23002595740772	0.0204641230803741
Heart	Arteria	HNRNPA1	HNRNPA1_K562	K562	0.5	1.15212053759505	0.204291662868277	0.0481837015215837
Heart	Arteria	HNRNPA1	HNRNPA1_K562	K562	1	1.13803637183983	0.186546667165071	0.151550427639722
Heart	Arteria	HNRNPA1	HNRNPA1_K562	K562	1.5	1.30094346013554	0.37955826293612	0.014574607705807
Heart	Arteria	HNRNPA1	HNRNPA1_K562	K562	3	1.56790647099572	0.648839502147555	0.00624216301958583
Heart	Arteria	HNRNPC	HNRNPC_HepG2	HepG2	0.5	1.16891027134163	0.225164189015134	0.00211176990823513
Heart	Arteria	HNRNPC	HNRNPC_HepG2	HepG2	2	1.15237906577869	0.204615357721156	0.128112477063545
Heart	Arteria	HNRNPC	HNRNPC_HepG2	HepG2	0	1.29309640014696	0.370829831861075	1.4236683461946e-10
Heart	Arteria	HNRNPC	HNRNPC_HepG2	HepG2	2.5	1.24780215801283	0.319389209616806	0.0393258802829337
Heart	Arteria	HNRNPC	HNRNPC_HepG2	HepG2	3.5	1.60127882915481	0.679224544839687	0.000750130933470847
Heart	Arteria	HNRNPC	HNRNPC_HepG2	HepG2	3	1.37520014580056	0.459641602885079	0.0115347083973032
Heart	Arteria	HNRNPC	HNRNPC_HepG2	HepG2	4.5	2.15366287219651	1.10679243248384	2.40847521802343e-05
Heart	Arteria	HNRNPC	HNRNPC_HepG2	HepG2	5.5	1.76148529881898	0.81679243429387	0.0287753573959197
Heart	Arteria	HNRNPC	HNRNPC_HepG2	HepG2	5	2.13961350748262	1.09735021662839	0.000460659876666087
Heart	Arteria	HNRNPC	HNRNPC_HepG2	HepG2	6	1.47788183169821	0.563530919255072	0.266050606816574
Heart	Arteria	HNRNPC	HNRNPC_HepG2	HepG2	1	1.21561639658943	0.281688039596674	0.00227059828320059
Heart	Arteria	HNRNPC	HNRNPC_HepG2	HepG2	1.5	1.17254463594212	0.229642843701532	0.0442790606026799
Heart	Arteria	HNRNPC	HNRNPC_HepG2	HepG2	4	1.79062049303024	0.840459602628437	0.000285922445236713
Heart	Arteria	HNRNPC	HNRNPC_K562	K562	0	1.18654559409036	0.246767538462113	0.000278920415775159
Heart	Arteria	HNRNPC	HNRNPC_K562	K562	0.5	1.11154384904182	0.152564862037765	0.0729385741485423
Heart	Arteria	HNRNPC	HNRNPC_K562	K562	1.5	1.09408140758228	0.129720089086333	0.329347102823728
Heart	Arteria	HNRNPC	HNRNPC_K562	K562	2	1.02793528118979	0.0397494353043994	0.786232203794472
Heart	Arteria	HNRNPC	HNRNPC_K562	K562	1	1.066843044816	0.0933479408092729	0.38449493445739
Heart	Arteria	HNRNPC	HNRNPC_K562	K562	2.5	1.21772584697343	0.284189368276105	0.110307268354507
Heart	Arteria	HNRNPC	HNRNPC_K562	K562	4.5	1.97508385890483	0.981913909116441	0.000538914625062138
Heart	Arteria	HNRNPC	HNRNPC_K562	K562	4	1.70156767542337	0.766864531882451	0.00240686700651926
Heart	Arteria	HNRNPC	HNRNPC_K562	K562	3.5	1.48826787317134	0.573634220340037	0.0104950749056669
Heart	Arteria	HNRNPC	HNRNPC_K562	K562	3	1.27398511251416	0.349348418702935	0.0877444124132514
Heart	Arteria	HNRNPC	HNRNPC_K562	K562	6	2.41936265113962	1.27462703876245	0.00774042384799097
Heart	Arteria	HNRNPC	HNRNPC_K562	K562	5	1.77049077583829	0.824149327384848	0.014588528251087
Heart	Arteria	HNRNPC	HNRNPC_K562	K562	5.5	1.96613090575716	0.975359380070891	0.0146772266087521
Heart	Arteria	HNRNPK	HNRNPK_HepG2	HepG2	2	1.2571950907035	0.330208543593924	0.0365938550188556
Heart	Arteria	HNRNPK	HNRNPK_HepG2	HepG2	2.5	1.53376270660466	0.617075296083515	0.000532139098621943
Heart	Arteria	HNRNPK	HNRNPK_HepG2	HepG2	3.5	1.6754334779458	0.74453440636159	0.00107133039487017
Heart	Arteria	HNRNPK	HNRNPK_HepG2	HepG2	3	1.61463037539268	0.691203937909714	0.000854736587378946
Heart	Arteria	HNRNPK	HNRNPK_HepG2	HepG2	4	1.59674256047889	0.67513172874201	0.0104053982286897
Heart	Arteria	HNRNPK	HNRNPK_HepG2	HepG2	5	1.55594501096445	0.637791074584562	0.0636269936108029
Heart	Arteria	HNRNPK	HNRNPK_HepG2	HepG2	5.5	1.11665534289999	0.159183964856841	0.753364952749841
Heart	Arteria	HNRNPK	HNRNPK_HepG2	HepG2	4.5	1.90011756421786	0.926088683854613	0.00117922592392639
Heart	Arteria	HNRNPK	HNRNPK_HepG2	HepG2	0.5	1.33185248687822	0.413434301452441	1.93925520695769e-06
Heart	Arteria	HNRNPK	HNRNPK_HepG2	HepG2	1	1.31641152222147	0.396610559179745	0.0002924980111918
Heart	Arteria	HNRNPK	HNRNPK_HepG2	HepG2	1.5	1.34119815796397	0.423522406811241	0.00142469484640095
Heart	Arteria	HNRNPK	HNRNPK_HepG2	HepG2	6	0.94625037213321	-0.0797061324181814	1
Heart	Arteria	HNRNPK	HNRNPK_HepG2	HepG2	0	1.36848615855856	0.452580842755544	1.18763393798143e-10
Heart	Arteria	HNRNPK	HNRNPK_K562	K562	0	1.34420574909599	0.426753979249187	2.95693442334427e-06
Heart	Arteria	HNRNPK	HNRNPK_K562	K562	2.5	1.14661678119055	0.19738329871677	0.389067645655245
Heart	Arteria	HNRNPK	HNRNPK_K562	K562	3	1.13247800308076	0.179483028060029	0.484335226053064
Heart	Arteria	HNRNPK	HNRNPK_K562	K562	3.5	1.18904534067647	0.249803728979206	0.375902361216878
Heart	Arteria	HNRNPK	HNRNPK_K562	K562	4	1.29162098690838	0.36918278789068	0.253487853827569
Heart	Arteria	HNRNPK	HNRNPK_K562	K562	4.5	1.65899672900356	0.730311041776001	0.0422711709194246
Heart	Arteria	HNRNPK	HNRNPK_K562	K562	5	1.69795690017157	0.763799838927527	0.081727549543263
Heart	Arteria	HNRNPK	HNRNPK_K562	K562	5.5	1.19621379901515	0.258475265132129	0.547107784044182
Heart	Arteria	HNRNPK	HNRNPK_K562	K562	6	1.4084046464427	0.494061891891067	0.445646470378642
Heart	Arteria	HNRNPK	HNRNPK_K562	K562	0.5	1.14215038109241	0.191752615475725	0.0901384447688785
Heart	Arteria	HNRNPK	HNRNPK_K562	K562	1	1.11678310852252	0.159349025890966	0.261343253701586
Heart	Arteria	HNRNPK	HNRNPK_K562	K562	1.5	1.26175503644598	0.335431845337461	0.0518755648400641
Heart	Arteria	HNRNPK	HNRNPK_K562	K562	2	1.15084959804064	0.202699303201785	0.305534535549054
Heart	Arteria	HNRNPL	HNRNPL_HepG2	HepG2	5.5	2.03799620889871	1.02715136779023	0.00847624057455703
Heart	Arteria	HNRNPL	HNRNPL_HepG2	HepG2	4.5	2.33474602749622	1.22326562282587	4.81343966683124e-06
Heart	Arteria	HNRNPL	HNRNPL_HepG2	HepG2	0.5	1.33900572210811	0.421162125889523	1.76666774318555e-07
Heart	Arteria	HNRNPL	HNRNPL_HepG2	HepG2	6	2.26788083628896	1.18134483718865	0.0113934843847915
Heart	Arteria	HNRNPL	HNRNPL_HepG2	HepG2	1.5	1.35537519207844	0.438692270638163	0.000368721095857536
Heart	Arteria	HNRNPL	HNRNPL_HepG2	HepG2	3	1.65360300493395	0.725612915549544	0.000154799556899977
Heart	Arteria	HNRNPL	HNRNPL_HepG2	HepG2	3.5	1.95428579489749	0.966641462562887	3.95162335436047e-06
Heart	Arteria	HNRNPL	HNRNPL_HepG2	HepG2	4	1.93594773852134	0.953040007161181	8.80949279637631e-05
Heart	Arteria	HNRNPL	HNRNPL_HepG2	HepG2	5	2.78234603864839	1.47630185812471	3.40675384607102e-06
Heart	Arteria	HNRNPL	HNRNPL_HepG2	HepG2	2	1.35118145517704	0.434221432550548	0.0025456548262346
Heart	Arteria	HNRNPL	HNRNPL_HepG2	HepG2	1	1.34693111760815	0.429676072904044	2.17201785329164e-05
Heart	Arteria	HNRNPL	HNRNPL_HepG2	HepG2	2.5	1.44622236791872	0.532289394909278	0.00144885537192288
Heart	Arteria	HNRNPL	HNRNPL_HepG2	HepG2	0	1.25948423931785	0.332833068876253	3.03703892701182e-07
Heart	Arteria	HNRNPL	HNRNPL_K562	K562	2.5	1.36392020208794	0.447759240095462	0.0085042834992694
Heart	Arteria	HNRNPL	HNRNPL_K562	K562	0	1.25629721879738	0.329177821998707	4.17103046077837e-07
Heart	Arteria	HNRNPL	HNRNPL_K562	K562	5	1.81251692419923	0.857994466214088	0.00969181185596105
Heart	Arteria	HNRNPL	HNRNPL_K562	K562	4.5	1.83695438456643	0.877315801747638	0.00139131110956546
Heart	Arteria	HNRNPL	HNRNPL_K562	K562	5.5	1.7702043352993	0.823915900708419	0.0304547842317884
Heart	Arteria	HNRNPL	HNRNPL_K562	K562	3	1.43255465483685	0.518590181745127	0.00845610081126142
Heart	Arteria	HNRNPL	HNRNPL_K562	K562	1	1.192773754316	0.254320418154237	0.0125690109866351
Heart	Arteria	HNRNPL	HNRNPL_K562	K562	1.5	1.25230093339409	0.324581289863521	0.00879444044195232
Heart	Arteria	HNRNPL	HNRNPL_K562	K562	2	1.1841243826174	0.243820632284669	0.0964970030056507
Heart	Arteria	HNRNPL	HNRNPL_K562	K562	6	2.03607741925041	1.02579241909786	0.0306053534714744
Heart	Arteria	HNRNPL	HNRNPL_K562	K562	3.5	1.55058266749484	0.632810443593604	0.00344979227689843
Heart	Arteria	HNRNPL	HNRNPL_K562	K562	4	1.63864238958501	0.712501041097169	0.0037359841000595
Heart	Arteria	HNRNPL	HNRNPL_K562	K562	0.5	1.21292773064832	0.278493593540583	0.000601643481503099
Heart	Arteria	HNRNPM	HNRNPM_HepG2	HepG2	0.5	1.39042485932038	0.475525781351267	6.289222577623e-07
Heart	Arteria	HNRNPM	HNRNPM_HepG2	HepG2	3	1.68613044693811	0.753716154234148	0.000746368922921063
Heart	Arteria	HNRNPM	HNRNPM_HepG2	HepG2	5.5	1.71253407697605	0.776132695924389	0.0788408948254514
Heart	Arteria	HNRNPM	HNRNPM_HepG2	HepG2	5	2.43875062794005	1.2861422443057	0.000293562820416067
Heart	Arteria	HNRNPM	HNRNPM_HepG2	HepG2	1	1.32581471076281	0.406879165690233	0.00074590174429546
Heart	Arteria	HNRNPM	HNRNPM_HepG2	HepG2	2	1.36861044042659	0.452711858105801	0.00821999633381314
Heart	Arteria	HNRNPM	HNRNPM_HepG2	HepG2	2.5	1.57259720532357	0.653149195676257	0.000832653106498678
Heart	Arteria	HNRNPM	HNRNPM_HepG2	HepG2	3.5	1.85972604727572	0.895090116308772	0.000256247947881865
Heart	Arteria	HNRNPM	HNRNPM_HepG2	HepG2	4	2.04609483380938	1.03287301365402	0.000169142524399009
Heart	Arteria	HNRNPM	HNRNPM_HepG2	HepG2	4.5	2.57601722023099	1.36514223765238	4.71269491191462e-06
Heart	Arteria	HNRNPM	HNRNPM_HepG2	HepG2	6	1.76712828598731	0.821406777206802	0.127242209545514
Heart	Arteria	HNRNPM	HNRNPM_HepG2	HepG2	0	1.32484687654439	0.405825625173357	2.3138102120525e-07
Heart	Arteria	HNRNPM	HNRNPM_HepG2	HepG2	1.5	1.40423746272974	0.489786922347984	0.000705679308740173
Heart	Arteria	HNRNPM	HNRNPM_K562	K562	6	2.96500348697572	1.56803380144569	0.00203425026242339
Heart	Arteria	HNRNPM	HNRNPM_K562	K562	1	1.15597764765945	0.209113501711746	0.0865114509845289
Heart	Arteria	HNRNPM	HNRNPM_K562	K562	2.5	1.25956787727425	0.332928870042233	0.0955193248014543
Heart	Arteria	HNRNPM	HNRNPM_K562	K562	3	1.31572075811117	0.395853331295211	0.0776299932536479
Heart	Arteria	HNRNPM	HNRNPM_K562	K562	1.5	1.22665867662442	0.294733868361235	0.0454975774155773
Heart	Arteria	HNRNPM	HNRNPM_K562	K562	4.5	2.59018531369885	1.37305531860309	2.51167041840146e-06
Heart	Arteria	HNRNPM	HNRNPM_K562	K562	5	2.16042923942749	1.11131797908833	0.0020114784392976
Heart	Arteria	HNRNPM	HNRNPM_K562	K562	5.5	2.22000346442979	1.15056192797708	0.0056485551824557
Heart	Arteria	HNRNPM	HNRNPM_K562	K562	3.5	1.56727117541377	0.648254822169908	0.00871410378765256
Heart	Arteria	HNRNPM	HNRNPM_K562	K562	2	1.1976786966556	0.260240925727919	0.124362109078691
Heart	Arteria	HNRNPM	HNRNPM_K562	K562	0.5	1.19637338369708	0.258667719585804	0.00675729275415064
Heart	Arteria	HNRNPM	HNRNPM_K562	K562	0	1.28195944165236	0.358350619013893	2.93768134050868e-06
Heart	Arteria	HNRNPM	HNRNPM_K562	K562	4	1.91193637000859	0.93503451066145	0.000561867797471911
Heart	Arteria	HNRNPU	HNRNPU_HepG2	HepG2	2.5	1.61837429312449	0.694545308871677	0.000301918890536653
Heart	Arteria	HNRNPU	HNRNPU_HepG2	HepG2	2	1.55919924904169	0.640805300862309	0.000103992410629234
Heart	Arteria	HNRNPU	HNRNPU_HepG2	HepG2	3	1.65240507486392	0.724567396116265	0.00111222598208218
Heart	Arteria	HNRNPU	HNRNPU_HepG2	HepG2	4	2.06848610996131	1.04857526980065	0.000119895670427059
Heart	Arteria	HNRNPU	HNRNPU_HepG2	HepG2	4.5	2.34434468133052	1.229184700088	3.76057310065798e-05
Heart	Arteria	HNRNPU	HNRNPU_HepG2	HepG2	5	2.6632651311677	1.41319605768141	5.00260272008311e-05
Heart	Arteria	HNRNPU	HNRNPU_HepG2	HepG2	5.5	1.68299503254903	0.751030918481615	0.0824352815883548
Heart	Arteria	HNRNPU	HNRNPU_HepG2	HepG2	6	1.30417324874721	0.383135532533805	0.516631461728485
Heart	Arteria	HNRNPU	HNRNPU_HepG2	HepG2	0	1.28547138119129	0.362297491406104	3.04605076850177e-06
Heart	Arteria	HNRNPU	HNRNPU_HepG2	HepG2	0.5	1.33419178546255	0.415966063860068	1.27703414099608e-05
Heart	Arteria	HNRNPU	HNRNPU_HepG2	HepG2	1	1.4704830423638	0.556290147136429	2.12212824541625e-06
Heart	Arteria	HNRNPU	HNRNPU_HepG2	HepG2	3.5	2.01086744925279	1.0078179863632	2.5047177077663e-05
Heart	Arteria	HNRNPU	HNRNPU_HepG2	HepG2	1.5	1.52123911231238	0.605246937437512	2.37012947034157e-05
Heart	Arteria	HNRNPU	HNRNPU_K562	K562	0.5	1.16360195182762	0.218597621531664	0.00515568126518295
Heart	Arteria	HNRNPU	HNRNPU_K562	K562	5.5	1.11089180048739	0.151718306824269	0.679624989730676
Heart	Arteria	HNRNPU	HNRNPU_K562	K562	6	1.10888156812988	0.149105289579315	0.734038473589349
Heart	Arteria	HNRNPU	HNRNPU_K562	K562	4	1.51233381492428	0.596776618382591	0.011984492754407
Heart	Arteria	HNRNPU	HNRNPU_K562	K562	0	1.26774634385901	0.342266113722962	3.52542092851824e-08
Heart	Arteria	HNRNPU	HNRNPU_K562	K562	2.5	1.09881247191891	0.135945190729768	0.411995116533747
Heart	Arteria	HNRNPU	HNRNPU_K562	K562	5	1.65748533839965	0.728996108762196	0.0251225138806253
Heart	Arteria	HNRNPU	HNRNPU_K562	K562	1.5	1.17882551703283	0.237350194704412	0.0500236238398182
Heart	Arteria	HNRNPU	HNRNPU_K562	K562	2	1.11517305504716	0.157267608159475	0.273176405581444
Heart	Arteria	HNRNPU	HNRNPU_K562	K562	3.5	1.42500392914711	0.510965897209471	0.0153820355567134
Heart	Arteria	HNRNPU	HNRNPU_K562	K562	4.5	1.74446746481993	0.802786690807923	0.00301520739067703
Heart	Arteria	HNRNPU	HNRNPU_K562	K562	1	1.1814517218507	0.240560677073379	0.0151552602185154
Heart	Arteria	HNRNPU	HNRNPU_K562	K562	3	1.24969534971379	0.32157643806699	0.101640414455176
Heart	Arteria	IGF2BP1	IGF2BP1_HepG2	HepG2	0	1.2022647131803	0.265754581861246	0.000863764514730495
Heart	Arteria	IGF2BP1	IGF2BP1_HepG2	HepG2	4	1.52195742069171	0.605927997595605	0.0346509829992371
Heart	Arteria	IGF2BP1	IGF2BP1_HepG2	HepG2	5	1.37285182982604	0.457175925623084	0.230379409854115
Heart	Arteria	IGF2BP1	IGF2BP1_HepG2	HepG2	6	0.980992955943015	-0.0276853177319056	1
Heart	Arteria	IGF2BP1	IGF2BP1_HepG2	HepG2	2.5	1.43989407007989	0.525962679589965	0.00837255798007113
Heart	Arteria	IGF2BP1	IGF2BP1_HepG2	HepG2	5.5	0.953358750698909	-0.0689088897121302	1
Heart	Arteria	IGF2BP1	IGF2BP1_HepG2	HepG2	0.5	1.20848160585483	0.273195514192471	0.0060475364795112
Heart	Arteria	IGF2BP1	IGF2BP1_HepG2	HepG2	1	1.18345099184067	0.242999963535671	0.0500345950384817
Heart	Arteria	IGF2BP1	IGF2BP1_HepG2	HepG2	1.5	1.4111634212578	0.496885070419981	0.000698498798733383
Heart	Arteria	IGF2BP1	IGF2BP1_HepG2	HepG2	2	1.34971866388434	0.432658722448617	0.0125606360818769
Heart	Arteria	IGF2BP1	IGF2BP1_HepG2	HepG2	3	1.40730673284356	0.492936808832675	0.0354479086483635
Heart	Arteria	IGF2BP1	IGF2BP1_HepG2	HepG2	3.5	1.48917244428648	0.574510825855477	0.0252150917801165
Heart	Arteria	IGF2BP1	IGF2BP1_HepG2	HepG2	4.5	1.80446427785084	0.851570583147831	0.00763293063723553
Heart	Arteria	IGF2BP1	IGF2BP1_K562	K562	2	0.952229881008936	-0.0706181934589605	0.781621531629666
Heart	Arteria	IGF2BP1	IGF2BP1_K562	K562	3.5	1.3069835245305	0.386240955036977	0.170742365548673
Heart	Arteria	IGF2BP1	IGF2BP1_K562	K562	1.5	0.999465091987224	-0.000771915607696772	1
Heart	Arteria	IGF2BP1	IGF2BP1_K562	K562	1	1.0084973004343	0.0122072221211608	0.922935767605018
Heart	Arteria	IGF2BP1	IGF2BP1_K562	K562	6	2.97770389295983	1.57420029743982	0.00288788300120487
Heart	Arteria	IGF2BP1	IGF2BP1_K562	K562	4	1.56205992227742	0.643449797855243	0.0395168235151122
Heart	Arteria	IGF2BP1	IGF2BP1_K562	K562	0	1.13370745249947	0.181048408112257	0.0355450791978649
Heart	Arteria	IGF2BP1	IGF2BP1_K562	K562	5	1.59630584428769	0.674737091262468	0.100906860481107
Heart	Arteria	IGF2BP1	IGF2BP1_K562	K562	5.5	2.05575302004289	1.03966694830486	0.0309340765866874
Heart	Arteria	IGF2BP1	IGF2BP1_K562	K562	0.5	1.04606333123189	0.0649701985144139	0.566220072987417
Heart	Arteria	IGF2BP1	IGF2BP1_K562	K562	4.5	1.69710312575192	0.763074233996937	0.0275220492517636
Heart	Arteria	IGF2BP1	IGF2BP1_K562	K562	3	1.16434240214245	0.219515378892519	0.393058700692777
Heart	Arteria	IGF2BP1	IGF2BP1_K562	K562	2.5	0.912587716101672	-0.13196486038768	0.682679464943457
Heart	Arteria	IGF2BP2	IGF2BP2_K562	K562	3.5	1.0761833724946	0.105923921805995	0.687195747182402
Heart	Arteria	IGF2BP2	IGF2BP2_K562	K562	2	0.911275515065556	-0.134040790448383	0.549832692159473
Heart	Arteria	IGF2BP2	IGF2BP2_K562	K562	5.5	1.20254246374172	0.266087838816894	0.579239891676164
Heart	Arteria	IGF2BP2	IGF2BP2_K562	K562	3	1.0658186654065	0.0919620039767702	0.716233376815073
Heart	Arteria	IGF2BP2	IGF2BP2_K562	K562	4	1.27021540138997	0.345073167994778	0.249616505642657
Heart	Arteria	IGF2BP2	IGF2BP2_K562	K562	4.5	1.42823657064102	0.514234964677202	0.148083637369767
Heart	Arteria	IGF2BP2	IGF2BP2_K562	K562	0.5	1.14648777215226	0.197220967958942	0.0581201130305598
Heart	Arteria	IGF2BP2	IGF2BP2_K562	K562	1	1.07638004115496	0.106187545074876	0.431437776589928
Heart	Arteria	IGF2BP2	IGF2BP2_K562	K562	1.5	0.993548797644182	-0.00933726843868065	1
Heart	Arteria	IGF2BP2	IGF2BP2_K562	K562	6	1.09299149487029	0.128282174700394	0.818669897334597
Heart	Arteria	IGF2BP2	IGF2BP2_K562	K562	0	1.31142954590436	0.391140303596298	1.75321982674133e-06
Heart	Arteria	IGF2BP2	IGF2BP2_K562	K562	2.5	0.949866494987492	-0.0742033399221273	0.814502496215263
Heart	Arteria	IGF2BP2	IGF2BP2_K562	K562	5	1.20483127428094	0.268831124213132	0.530858323371873
Heart	Arteria	IGF2BP3	IGF2BP3_HepG2	HepG2	4	1.26868448604431	0.343333324485535	0.269538685680098
Heart	Arteria	IGF2BP3	IGF2BP3_HepG2	HepG2	6	0.776922870819275	-0.364156712997911	0.82661263653637
Heart	Arteria	IGF2BP3	IGF2BP3_HepG2	HepG2	2	1.14130546789453	0.190684977459662	0.281346145912721
Heart	Arteria	IGF2BP3	IGF2BP3_HepG2	HepG2	4.5	1.46362188196204	0.54954289004499	0.10250030568768
Heart	Arteria	IGF2BP3	IGF2BP3_HepG2	HepG2	5	1.24638390425049	0.317748507729217	0.453897362111293
Heart	Arteria	IGF2BP3	IGF2BP3_HepG2	HepG2	1.5	1.33562632766521	0.417516436981535	0.004779924449512
Heart	Arteria	IGF2BP3	IGF2BP3_HepG2	HepG2	2.5	1.1601620602649	0.214326346051129	0.29637853659815
Heart	Arteria	IGF2BP3	IGF2BP3_HepG2	HepG2	3	1.27453093136713	0.349966386297316	0.139902387771802
Heart	Arteria	IGF2BP3	IGF2BP3_HepG2	HepG2	5.5	0.698945843056296	-0.516747420375366	0.480403471244677
Heart	Arteria	IGF2BP3	IGF2BP3_HepG2	HepG2	0	1.21014059202569	0.275174667033335	0.000512963334015457
Heart	Arteria	IGF2BP3	IGF2BP3_HepG2	HepG2	0.5	1.16164702514	0.216171761995767	0.0277975555054664
Heart	Arteria	IGF2BP3	IGF2BP3_HepG2	HepG2	3.5	1.28830324763001	0.365472222612569	0.149760489561959
Heart	Arteria	IGF2BP3	IGF2BP3_HepG2	HepG2	1	1.22079437223443	0.287820216590297	0.0191498011772311
Heart	Arteria	KHDRBS1	KHDRBS1_K562	K562	6	1.75789444531467	0.813848444888043	0.120600215751497
Heart	Arteria	KHDRBS1	KHDRBS1_K562	K562	0	1.27461039853835	0.350056335718736	4.9071250834106e-07
Heart	Arteria	KHDRBS1	KHDRBS1_K562	K562	4.5	1.46197451852834	0.5479181660693	0.0609943381318434
Heart	Arteria	KHDRBS1	KHDRBS1_K562	K562	5	1.50533220982909	0.590081908635149	0.0874497912431586
Heart	Arteria	KHDRBS1	KHDRBS1_K562	K562	5.5	1.51539080134972	0.599689895654239	0.160182994334447
Heart	Arteria	KHDRBS1	KHDRBS1_K562	K562	1.5	1.09707037193742	0.133656070854037	0.315409375764455
Heart	Arteria	KHDRBS1	KHDRBS1_K562	K562	2	1.00436439101562	0.00628278496074096	0.955458094119806
Heart	Arteria	KHDRBS1	KHDRBS1_K562	K562	0.5	1.13966314858538	0.18860746853194	0.0310382597112846
Heart	Arteria	KHDRBS1	KHDRBS1_K562	K562	1	1.14544879964779	0.195912973138377	0.0792240121355061
Heart	Arteria	KHDRBS1	KHDRBS1_K562	K562	4	1.31889767319045	0.399332637290486	0.144444677157915
Heart	Arteria	KHDRBS1	KHDRBS1_K562	K562	3	1.15574528974945	0.208823482868934	0.320702268760477
Heart	Arteria	KHDRBS1	KHDRBS1_K562	K562	2.5	1.07458174747375	0.103775238176523	0.598473752568558
Heart	Arteria	KHDRBS1	KHDRBS1_K562	K562	3.5	1.30822165398249	0.387606999558833	0.0902894923025958
Heart	Arteria	KHSRP	KHSRP_HepG2	HepG2	0.5	1.2206589307561	0.287660147381448	0.00153388218539225
Heart	Arteria	KHSRP	KHSRP_HepG2	HepG2	2.5	1.32220850513946	0.402949700001011	0.0324698492233639
Heart	Arteria	KHSRP	KHSRP_HepG2	HepG2	3	1.32522358619456	0.406235785699624	0.0649230610800471
Heart	Arteria	KHSRP	KHSRP_HepG2	HepG2	5	1.56951898510425	0.650322480051022	0.0719499194118383
Heart	Arteria	KHSRP	KHSRP_HepG2	HepG2	3.5	1.53349982418429	0.6168280012	0.009660063629985
Heart	Arteria	KHSRP	KHSRP_HepG2	HepG2	2	1.23871159475826	0.308840328523192	0.0535822694860513
Heart	Arteria	KHSRP	KHSRP_HepG2	HepG2	4	1.39684100260524	0.482167813297512	0.0827436711822676
Heart	Arteria	KHSRP	KHSRP_HepG2	HepG2	0	1.25896337772189	0.332236316776179	5.50304045624289e-06
Heart	Arteria	KHSRP	KHSRP_HepG2	HepG2	1	1.24908820590794	0.320875358237097	0.00479550810853278
Heart	Arteria	KHSRP	KHSRP_HepG2	HepG2	1.5	1.22765465579141	0.295904781842372	0.0351273847240297
Heart	Arteria	KHSRP	KHSRP_HepG2	HepG2	6	0.757525881960341	-0.400632913710433	0.686874266336742
Heart	Arteria	KHSRP	KHSRP_HepG2	HepG2	4.5	1.57585611494666	0.656135814153821	0.0282342251258169
Heart	Arteria	KHSRP	KHSRP_HepG2	HepG2	5.5	1.04054116268903	0.057334037665957	0.870936098621342
Heart	Arteria	KHSRP	KHSRP_K562	K562	2	0.985849175814639	-0.0205611480287191	0.924092071168319
Heart	Arteria	KHSRP	KHSRP_K562	K562	4.5	1.58732323778864	0.666595944222298	0.0110880370366558
Heart	Arteria	KHSRP	KHSRP_K562	K562	5	1.54732362673228	0.629774971739918	0.0437459050520935
Heart	Arteria	KHSRP	KHSRP_K562	K562	5.5	1.38989598054563	0.4749769160665	0.232829627685526
Heart	Arteria	KHSRP	KHSRP_K562	K562	6	1.44944962879701	0.535505197802577	0.252744088644317
Heart	Arteria	KHSRP	KHSRP_K562	K562	1	1.04550691795581	0.0642026080466001	0.506594625210676
Heart	Arteria	KHSRP	KHSRP_K562	K562	2.5	1.11770681995878	0.160541811740857	0.313332514638582
Heart	Arteria	KHSRP	KHSRP_K562	K562	3	1.14059814653739	0.189790593454578	0.328273947880193
Heart	Arteria	KHSRP	KHSRP_K562	K562	3.5	1.31747800271176	0.397778874087474	0.0510673315404299
Heart	Arteria	KHSRP	KHSRP_K562	K562	4	1.36569796765614	0.449638458192827	0.0567270292224213
Heart	Arteria	KHSRP	KHSRP_K562	K562	1.5	0.98785805842798	-0.0176243335564181	0.902687887421654
Heart	Arteria	KHSRP	KHSRP_K562	K562	0.5	1.04681658472692	0.0660086863134007	0.386045647775213
Heart	Arteria	KHSRP	KHSRP_K562	K562	0	1.21819410446796	0.284744027531743	1.86148912736417e-06
Heart	Arteria	PABPC4	PABPC4_K562	K562	3.5	0.576085268500269	-0.795645728813569	0.172219847976412
Heart	Arteria	PABPC4	PABPC4_K562	K562	3	0.81376520283754	-0.297315503793792	0.584398711004621
Heart	Arteria	PABPC4	PABPC4_K562	K562	0.5	1.09636210515874	0.132724368587917	0.381962408775124
Heart	Arteria	PABPC4	PABPC4_K562	K562	1	0.991616005450236	-0.0121465370596121	1
Heart	Arteria	PABPC4	PABPC4_K562	K562	1.5	0.943797909174638	-0.083450119457025	0.797750438622118
Heart	Arteria	PABPC4	PABPC4_K562	K562	2.5	0.738144717995471	-0.438024401276024	0.290196546999884
Heart	Arteria	PABPC4	PABPC4_K562	K562	5	0.819635174642556	-0.286946195953678	1
Heart	Arteria	PABPC4	PABPC4_K562	K562	2	0.84565826567702	-0.241853313356715	0.484690355101421
Heart	Arteria	PABPC4	PABPC4_K562	K562	5.5	0.564083379408631	-0.826019666006989	0.583372615949779
Heart	Arteria	PABPC4	PABPC4_K562	K562	0	1.25293414714395	0.32531059017015	0.00787910825926686
Heart	Arteria	PABPC4	PABPC4_K562	K562	6	0.430602753774716	-1.21557054908305	0.7260251306173
Heart	Arteria	PABPC4	PABPC4_K562	K562	4	0.771189634163289	-0.3748424349711	0.604711464828739
Heart	Arteria	PABPC4	PABPC4_K562	K562	4.5	0.860160505228227	-0.217322204269143	1
Heart	Arteria	PABPN1	PABPN1_HepG2	HepG2	1	1.28063073985366	0.356854545485304	0.0158076784372354
Heart	Arteria	PABPN1	PABPN1_HepG2	HepG2	3.5	1.40461921416665	0.490179075434892	0.102385118972747
Heart	Arteria	PABPN1	PABPN1_HepG2	HepG2	5.5	0.629751379519795	-0.66714571758773	0.520050601827495
Heart	Arteria	PABPN1	PABPN1_HepG2	HepG2	4	1.46273371258992	0.548667153965368	0.108022665261803
Heart	Arteria	PABPN1	PABPN1_HepG2	HepG2	0	1.40264287065151	0.48814772861134	3.78162830943823e-07
Heart	Arteria	PABPN1	PABPN1_HepG2	HepG2	3	1.23694234231222	0.306778253427546	0.292177293925628
Heart	Arteria	PABPN1	PABPN1_HepG2	HepG2	5	1.19453935330205	0.256454383202785	0.585796214131591
Heart	Arteria	PABPN1	PABPN1_HepG2	HepG2	2	1.16085879380378	0.215192494280507	0.316870511782859
Heart	Arteria	PABPN1	PABPN1_HepG2	HepG2	6	0.73331609548342	-0.447492889588781	0.793960770442113
Heart	Arteria	PABPN1	PABPN1_HepG2	HepG2	4.5	1.4596815049847	0.545653614786943	0.169930308999105
Heart	Arteria	PABPN1	PABPN1_HepG2	HepG2	2.5	1.16441382632396	0.219603875327857	0.36536524606775
Heart	Arteria	PABPN1	PABPN1_HepG2	HepG2	1.5	1.29097679653858	0.368463070498277	0.041063260030255
Heart	Arteria	PABPN1	PABPN1_HepG2	HepG2	0.5	1.35991310116444	0.443514465795775	0.000135904806826133
Heart	Arteria	PCBP1	PCBP1_HepG2	HepG2	1.5	1.25616449484575	0.329025397636602	0.337868085372605
Heart	Arteria	PCBP1	PCBP1_HepG2	HepG2	2	1.05106129540193	0.0718468063065689	0.87209998378
Heart	Arteria	PCBP1	PCBP1_HepG2	HepG2	3	0.724351448757784	-0.465238245153353	0.663801032315596
Heart	Arteria	PCBP1	PCBP1_HepG2	HepG2	5.5	0	-Inf	0.641753784199009
Heart	Arteria	PCBP1	PCBP1_HepG2	HepG2	6	0	-Inf	1
Heart	Arteria	PCBP1	PCBP1_HepG2	HepG2	4	0.891729151777407	-0.165322513355852	1
Heart	Arteria	PCBP1	PCBP1_HepG2	HepG2	0.5	1.09395789666338	0.129557213958775	0.597701212717063
Heart	Arteria	PCBP1	PCBP1_HepG2	HepG2	1	1.15748194216424	0.210989686225622	0.500657844106757
Heart	Arteria	PCBP1	PCBP1_HepG2	HepG2	2.5	1.07791820502677	0.108247707144784	0.849123791982448
Heart	Arteria	PCBP1	PCBP1_HepG2	HepG2	3.5	0.902803849732122	-0.147515524410781	1
Heart	Arteria	PCBP1	PCBP1_HepG2	HepG2	0	1.05566199406859	0.0781479809654465	0.729963870896804
Heart	Arteria	PCBP1	PCBP1_HepG2	HepG2	4.5	1.1632823179461	0.218201268155041	0.745835060973594
Heart	Arteria	PCBP1	PCBP1_HepG2	HepG2	5	1.1061652922051	0.145566980895332	0.703469650020622
Heart	Arteria	PCBP1	PCBP1_K562	K562	1.5	1.08915850881257	0.123213929478835	0.61635051171657
Heart	Arteria	PCBP1	PCBP1_K562	K562	3	0.858833276449368	-0.219550003785677	0.871745129999963
Heart	Arteria	PCBP1	PCBP1_K562	K562	2.5	0.987278549898089	-0.0184709120692071	1
Heart	Arteria	PCBP1	PCBP1_K562	K562	1	1.06220150680612	0.0870574811072751	0.682387172837398
Heart	Arteria	PCBP1	PCBP1_K562	K562	5.5	0.39371840301312	-1.34476394699477	0.519716849700921
Heart	Arteria	PCBP1	PCBP1_K562	K562	6	0.610904474930048	-0.710981286559984	1
Heart	Arteria	PCBP1	PCBP1_K562	K562	0	1.12190190909363	0.165946542746598	0.267465772882934
Heart	Arteria	PCBP1	PCBP1_K562	K562	4.5	1.44989840674041	0.535951815256323	0.347975364263977
Heart	Arteria	PCBP1	PCBP1_K562	K562	0.5	1.18772173045051	0.248196868862658	0.176080882773214
Heart	Arteria	PCBP1	PCBP1_K562	K562	2	0.843922869327532	-0.244816945627383	0.637271492722054
Heart	Arteria	PCBP1	PCBP1_K562	K562	3.5	1.07551793309093	0.105031580331087	0.723771376299538
Heart	Arteria	PCBP1	PCBP1_K562	K562	4	1.44430281704832	0.530373253895907	0.302535403885907
Heart	Arteria	PCBP1	PCBP1_K562	K562	5	1.16696124818902	0.222756653612716	0.778542455237616
Heart	Arteria	PCBP2	PCBP2_HepG2	HepG2	3.5	1.78024604304432	0.832076645994693	0.000314164946629276
Heart	Arteria	PCBP2	PCBP2_HepG2	HepG2	3	1.67781918654957	0.746587249315443	0.000474087522586827
Heart	Arteria	PCBP2	PCBP2_HepG2	HepG2	5.5	1.82131731946631	0.864982298118359	0.0464631376122256
Heart	Arteria	PCBP2	PCBP2_HepG2	HepG2	2	1.45384266822866	0.539871152305931	0.000737024865074802
Heart	Arteria	PCBP2	PCBP2_HepG2	HepG2	4	1.91457715612788	0.937025800966411	0.000423534601941049
Heart	Arteria	PCBP2	PCBP2_HepG2	HepG2	1	1.33142600547296	0.412972252428707	0.000285927739158652
Heart	Arteria	PCBP2	PCBP2_HepG2	HepG2	5	2.36585192835732	1.24235978250719	0.000386148326939118
Heart	Arteria	PCBP2	PCBP2_HepG2	HepG2	6	1.27690430694091	0.352650411434748	0.540422202913008
Heart	Arteria	PCBP2	PCBP2_HepG2	HepG2	1.5	1.4283380052166	0.514337422467351	0.000178252935644323
Heart	Arteria	PCBP2	PCBP2_HepG2	HepG2	2.5	1.5695200015009	0.650323414318109	0.000480781650265272
Heart	Arteria	PCBP2	PCBP2_HepG2	HepG2	4.5	2.377853056003	1.24965956372698	1.89499970095526e-05
Heart	Arteria	PCBP2	PCBP2_HepG2	HepG2	0	1.28091086663393	0.357170087905	1.29664221589956e-06
Heart	Arteria	PCBP2	PCBP2_HepG2	HepG2	0.5	1.28833830975323	0.365511486088037	6.08821961661079e-05
Heart	Arteria	PTBP1	PTBP1_HepG2	HepG2	3	1.5029878148476	0.587833312960068	0.00529306484352916
Heart	Arteria	PTBP1	PTBP1_HepG2	HepG2	3.5	1.61505349169732	0.691581948775816	0.00341181128899854
Heart	Arteria	PTBP1	PTBP1_HepG2	HepG2	2	1.33584700691517	0.417754787000707	0.0087458295627472
Heart	Arteria	PTBP1	PTBP1_HepG2	HepG2	4.5	2.18391012883004	1.12691348841941	0.000120695514229485
Heart	Arteria	PTBP1	PTBP1_HepG2	HepG2	5	2.48777167443941	1.31485408222506	9.45913122140473e-05
Heart	Arteria	PTBP1	PTBP1_HepG2	HepG2	6	1.58825869591294	0.667445918094235	0.225982195482162
Heart	Arteria	PTBP1	PTBP1_HepG2	HepG2	0.5	1.266546311256	0.340899830147807	0.000154624352393436
Heart	Arteria	PTBP1	PTBP1_HepG2	HepG2	1	1.3326328198467	0.414279329595937	0.000222108280145255
Heart	Arteria	PTBP1	PTBP1_HepG2	HepG2	1.5	1.43357202868891	0.519614393466941	0.000123712312485709
Heart	Arteria	PTBP1	PTBP1_HepG2	HepG2	2.5	1.27530505245546	0.350842380437002	0.0641079107534959
Heart	Arteria	PTBP1	PTBP1_HepG2	HepG2	4	1.7685004404666	0.822526578359673	0.00163405306423981
Heart	Arteria	PTBP1	PTBP1_HepG2	HepG2	5.5	1.47473211178173	0.560452909657916	0.194266876234112
Heart	Arteria	PTBP1	PTBP1_HepG2	HepG2	0	1.28317957585445	0.359723083962832	7.25797102603663e-07
Heart	Arteria	PTBP1	PTBP1_K562	K562	1.5	1.32888645443973	0.410217840043062	0.0141921323823529
Heart	Arteria	PTBP1	PTBP1_K562	K562	2	1.24686696084081	0.31830753960667	0.100209049868783
Heart	Arteria	PTBP1	PTBP1_K562	K562	1	1.21168766639516	0.277017866951879	0.0457672597165538
Heart	Arteria	PTBP1	PTBP1_K562	K562	3.5	1.46657941257845	0.552455192493593	0.0504547798179964
Heart	Arteria	PTBP1	PTBP1_K562	K562	3	1.34281571441272	0.425261325505743	0.0967020463473314
Heart	Arteria	PTBP1	PTBP1_K562	K562	0.5	1.12824314352941	0.17407801114408	0.12291614203319
Heart	Arteria	PTBP1	PTBP1_K562	K562	4	1.91131775791958	0.934567647318874	0.00260556956609429
Heart	Arteria	PTBP1	PTBP1_K562	K562	5	2.60159314484097	1.37939536105073	0.000315307579056447
Heart	Arteria	PTBP1	PTBP1_K562	K562	6	2.50425365083911	1.32438069736413	0.0219433937052563
Heart	Arteria	PTBP1	PTBP1_K562	K562	5.5	2.65034462594189	1.40617996639695	0.00203166675232264
Heart	Arteria	PTBP1	PTBP1_K562	K562	0	1.1322355976233	0.179174187990725	0.0486447358479121
Heart	Arteria	PTBP1	PTBP1_K562	K562	4.5	2.44752352764108	1.29132272828575	9.7551875649857e-05
Heart	Arteria	PTBP1	PTBP1_K562	K562	2.5	1.18981951875696	0.250742750725222	0.274077227615263
Heart	Arteria	PUM1	PUM1_K562	K562	1.5	1.01567399757342	0.0224374123895418	0.878444893175755
Heart	Arteria	PUM1	PUM1_K562	K562	5.5	1.68502934919303	0.752773719933239	0.205411534113103
Heart	Arteria	PUM1	PUM1_K562	K562	6	2.30972265705278	1.20771962856075	0.0617751397954449
Heart	Arteria	PUM1	PUM1_K562	K562	0	1.22299055434815	0.290413261389663	0.00984135086539013
Heart	Arteria	PUM1	PUM1_K562	K562	1	1.23588284706004	0.305541992452636	0.0700875831328233
Heart	Arteria	PUM1	PUM1_K562	K562	3.5	1.08404120025227	0.116419589044258	0.684861095042637
Heart	Arteria	PUM1	PUM1_K562	K562	4	1.06890787619565	0.0961375197723423	0.756225062765385
Heart	Arteria	PUM1	PUM1_K562	K562	2	0.866771375202649	-0.206276585127999	0.529567011728945
Heart	Arteria	PUM1	PUM1_K562	K562	2.5	0.865246106584334	-0.208817550289892	0.597827644679346
Heart	Arteria	PUM1	PUM1_K562	K562	0.5	1.08149768176945	0.113030572832669	0.42911715356692
Heart	Arteria	PUM1	PUM1_K562	K562	4.5	1.28830801706193	0.36547756360899	0.379004312897999
Heart	Arteria	PUM1	PUM1_K562	K562	5	1.34596070952248	0.428636296274821	0.396815615594793
Heart	Arteria	PUM1	PUM1_K562	K562	3	0.977959711543649	-0.0321530623820581	1
Heart	Arteria	PUM2	PUM2_K562	K562	2	1.39096700624817	0.476088199544658	0.0698595224819598
Heart	Arteria	PUM2	PUM2_K562	K562	0	1.10878774330868	0.148983214927667	0.23939372715975
Heart	Arteria	PUM2	PUM2_K562	K562	2.5	1.61140521811298	0.688319332437288	0.0178588152438982
Heart	Arteria	PUM2	PUM2_K562	K562	6	2.44549454418117	1.29012624607355	0.0682508217785815
Heart	Arteria	PUM2	PUM2_K562	K562	3	1.60163938870094	0.679549359546759	0.0522854784302203
Heart	Arteria	PUM2	PUM2_K562	K562	5.5	2.94325760925933	1.55741382000036	0.00648756354281348
Heart	Arteria	PUM2	PUM2_K562	K562	3.5	1.61589505132086	0.69233350139684	0.0652782996134288
Heart	Arteria	PUM2	PUM2_K562	K562	4.5	2.21214766119372	1.14544768890077	0.00904347363440872
Heart	Arteria	PUM2	PUM2_K562	K562	5	2.52415971749026	1.33580320047137	0.00773883806259889
Heart	Arteria	PUM2	PUM2_K562	K562	1	1.24931425603847	0.321136422183493	0.0925351143172282
Heart	Arteria	PUM2	PUM2_K562	K562	1.5	1.19681669308399	0.259202203050029	0.263174298762207
Heart	Arteria	PUM2	PUM2_K562	K562	4	1.79211458982886	0.841662887893512	0.0514435367001051
Heart	Arteria	PUM2	PUM2_K562	K562	0.5	1.22401881501405	0.291625734598241	0.0599198318946447
Heart	Arteria	QKI	QKI_HepG2	HepG2	0	1.26816563769062	0.342743191114811	4.6902722816269e-06
Heart	Arteria	QKI	QKI_HepG2	HepG2	4.5	1.57538716153867	0.655706423781995	0.0325088490949901
Heart	Arteria	QKI	QKI_HepG2	HepG2	4	1.31758117845845	0.397891851541049	0.173212922680643
Heart	Arteria	QKI	QKI_HepG2	HepG2	3.5	1.50599353959437	0.590715581155153	0.0136493146685968
Heart	Arteria	QKI	QKI_HepG2	HepG2	0.5	1.30914499870881	0.388624896620822	2.59314969079144e-05
Heart	Arteria	QKI	QKI_HepG2	HepG2	1	1.38947216562063	0.474536934269816	3.31415017671453e-05
Heart	Arteria	QKI	QKI_HepG2	HepG2	1.5	1.36327992430056	0.447081823284952	0.00141101539243088
Heart	Arteria	QKI	QKI_HepG2	HepG2	2	1.35554858945591	0.438876827311156	0.00801295734873514
Heart	Arteria	QKI	QKI_HepG2	HepG2	2.5	1.35222146877893	0.435331457642721	0.0232714317099578
Heart	Arteria	QKI	QKI_HepG2	HepG2	3	1.34942483044133	0.432344613877781	0.0485168173583688
Heart	Arteria	QKI	QKI_HepG2	HepG2	5.5	1.37372089602542	0.458088916221221	0.313907576390288
Heart	Arteria	QKI	QKI_HepG2	HepG2	6	0.822316669026629	-0.282234021106115	0.836165717255583
Heart	Arteria	QKI	QKI_HepG2	HepG2	5	1.91557329500862	0.937776228227172	0.0098865089463616
Heart	Arteria	QKI	QKI_K652	K652	0	1.21578058083539	0.281882880505006	0.0226576183093216
Heart	Arteria	QKI	QKI_K652	K652	0.5	1.14588687066715	0.196464618978021	0.191636521105685
Heart	Arteria	QKI	QKI_K652	K652	4	0.996373805537218	-0.00524100096648502	1
Heart	Arteria	QKI	QKI_K652	K652	4.5	1.15699162987862	0.210378427473673	0.692646393480651
Heart	Arteria	QKI	QKI_K652	K652	5	1.47554552679829	0.561248434678998	0.342143802920379
Heart	Arteria	QKI	QKI_K652	K652	5.5	1.47125217122131	0.557044544343014	0.398739977452592
Heart	Arteria	QKI	QKI_K652	K652	6	1.34886089091329	0.43174156968133	0.494433089086766
Heart	Arteria	QKI	QKI_K652	K652	1	1.16763179990465	0.223585407610931	0.239802865069063
Heart	Arteria	QKI	QKI_K652	K652	1.5	1.10196493913154	0.14007832286939	0.551636049474213
Heart	Arteria	QKI	QKI_K652	K652	2	0.914251928498817	-0.129336330134779	0.765051999713583
Heart	Arteria	QKI	QKI_K652	K652	2.5	1.05154758121756	0.0725141316993074	0.8145429043869
Heart	Arteria	QKI	QKI_K652	K652	3	0.803962081443838	-0.314800636024179	0.58512588798078
Heart	Arteria	QKI	QKI_K652	K652	3.5	1.00986142123202	0.0141573319689099	0.880677103567775
Heart	Arteria	RBFOX2	RBFOX2_HepG2	HepG2	2	1.34421405816184	0.426762897088626	0.0061927686284111
Heart	Arteria	RBFOX2	RBFOX2_HepG2	HepG2	5.5	1.15786592064937	0.21146820081108	0.6342649885729
Heart	Arteria	RBFOX2	RBFOX2_HepG2	HepG2	4	1.46200363108529	0.547946894424576	0.0372898494917745
Heart	Arteria	RBFOX2	RBFOX2_HepG2	HepG2	3.5	1.43785984650389	0.523923057830051	0.0242492037178163
Heart	Arteria	RBFOX2	RBFOX2_HepG2	HepG2	4.5	1.6965017991132	0.762562960004867	0.00935951968921371
Heart	Arteria	RBFOX2	RBFOX2_HepG2	HepG2	0.5	1.30526820720608	0.384346283001275	1.2707841894259e-05
Heart	Arteria	RBFOX2	RBFOX2_HepG2	HepG2	1.5	1.35170858655626	0.434784156024006	0.00109366004526599
Heart	Arteria	RBFOX2	RBFOX2_HepG2	HepG2	5	1.80092792112435	0.848740441145692	0.0149145366780473
Heart	Arteria	RBFOX2	RBFOX2_HepG2	HepG2	1	1.35615667462446	0.439523860367014	5.99196768289319e-05
Heart	Arteria	RBFOX2	RBFOX2_HepG2	HepG2	6	0.98176030051081	-0.0265572653337018	1
[truncated: 2,447 more rows]
