# Supplementary material for: In heart failure reactivation of RNA-binding proteins is associated with the expression of 1,523 fetal-specific isoforms
Source: PLoS Comput Biol. 2022 Feb 28;18(2):e1009918. doi: 10.1371/journal.pcbi.1009918 (PMC8912908; doi:10.1371/journal.pcbi.1009918)
Supplement: S10 Table — For each pairwise comparison between CVS tissues, (column A, B: iPSC-CVPC vs. adult heart, iPSC-CVPC vs. adult arteria and adult heart vs. adult arteria), the table shows the differences in the probability of each base pair occurring in the 100 bp upstream of the splice acceptor site and the 100 bp downstream of the splice donor site. The table shows: the two tested CVS tissues (columns A, B); which splice site is tested (donor or acceptor, column C); the tested nucleotide (column D); the position relative to the exon start (negative values, upstream of the splice acceptor site) or end (positive values, downstream of the splice donor site) (column E); and the results obtained from Fisher’s exact test (fisher.test function in R), including the estimate (odds ratio, column F), its 95% confidence interval (column G, H) and the p-value (column I). In Fig 3C–3I, only the tests associated with the most common nucleotide at each position are shown. Fig 3D, 3F and 3H shows the estimate from Fisher’s exact test and its 95% confidence interval; whereas Fig 3E, 3G and 3I shows the p-values calculated with Fisher’s exact test. (CSV) [file pcbi.1009918.s026.csv]

Tissue1	Tissue2	Splice site	Nucleotide	Position relative to exon	Estimate	Confidence interval (2.5%)	Confidence interval (97.5%)	p-value (Fisher's exact test)
Heart	Arteria	donor	A	1	0.935418738	0.630727167	1.38641098	0.774103904
Heart	Arteria	donor	A	2	0.639109445	0.327987025	1.217644275	0.172225483
Heart	Arteria	donor	A	3	0.940110999	0.743051251	1.189283301	0.600334923
Heart	Arteria	donor	A	4	0.918327696	0.73002442	1.154934818	0.460232928
Heart	Arteria	donor	A	5	0.941169265	0.733753076	1.207053233	0.622856955
Heart	Arteria	donor	A	6	0.945090384	0.687420439	1.299137033	0.754877125
Heart	Arteria	donor	A	7	0.989626012	0.760544599	1.287824943	0.948202332
Heart	Arteria	donor	A	8	1.247238499	0.960911806	1.620593143	0.094322489
Heart	Arteria	donor	A	9	1.153718962	0.8680796	1.534896943	0.326807309
Heart	Arteria	donor	A	10	0.939719236	0.713777919	1.236941195	0.684145636
Heart	Arteria	donor	A	11	1.316142019	0.978415867	1.774108463	0.068883952
Heart	Arteria	donor	A	12	0.957238628	0.719332579	1.27379255	0.77847926
Heart	Arteria	donor	A	13	0.836607111	0.630936658	1.108409347	0.212071969
Heart	Arteria	donor	A	14	1.176347084	0.87878429	1.576553915	0.281838419
Heart	Arteria	donor	A	15	0.984295311	0.746324141	1.298312535	0.945582823
Heart	Arteria	donor	A	16	0.866949886	0.651107766	1.153570945	0.324750523
Heart	Arteria	donor	A	17	1.036719341	0.791331503	1.358602194	0.790098507
Heart	Arteria	donor	A	18	1.056712707	0.78170514	1.429318661	0.711578177
Heart	Arteria	donor	A	19	1.00986457	0.770020549	1.324660342	0.946735514
Heart	Arteria	donor	A	20	0.836157124	0.623277015	1.120724646	0.220916012
Heart	Arteria	donor	A	21	0.816088166	0.617639545	1.077311096	0.150481257
Heart	Arteria	donor	A	22	1.170769603	0.895288172	1.532338359	0.260391532
Heart	Arteria	donor	A	23	0.895101223	0.675664092	1.185277318	0.44644057
Heart	Arteria	donor	A	24	0.98270207	0.750604016	1.286704155	0.946968818
Heart	Arteria	donor	A	25	1.119128524	0.856803334	1.462816547	0.428656107
Heart	Arteria	donor	A	26	1.272759467	0.966604687	1.678205203	0.078535771
Heart	Arteria	donor	A	27	1.010774671	0.769077303	1.328752333	0.946307168
Heart	Arteria	donor	A	28	0.948359622	0.720678543	1.247929127	0.734940826
Heart	Arteria	donor	A	29	1.095871924	0.834681519	1.439693826	0.502352492
Heart	Arteria	donor	A	30	1.235385461	0.939463855	1.626495197	0.121220828
Heart	Arteria	donor	A	31	1.417751166	1.090254738	1.846635925	0.008080273
Heart	Arteria	donor	A	32	1.211966698	0.917111754	1.603471314	0.170022143
Heart	Arteria	donor	A	33	0.932031499	0.712270714	1.219353332	0.59633345
Heart	Arteria	donor	A	34	1.041600763	0.800014953	1.356505343	0.794293792
Heart	Arteria	donor	A	35	0.87282608	0.671895108	1.133300391	0.302103128
Heart	Arteria	donor	A	36	1.089202077	0.834729746	1.421982185	0.554198651
Heart	Arteria	donor	A	37	1.185575641	0.904366485	1.555617646	0.205373498
Heart	Arteria	donor	A	38	1.049319791	0.80715986	1.36445505	0.745871567
Heart	Arteria	donor	A	39	1.036282513	0.79154546	1.357078932	0.790628758
Heart	Arteria	donor	A	40	1.110689652	0.842452202	1.465408435	0.453791438
Heart	Arteria	donor	A	41	1.070508808	0.820430307	1.397475327	0.645495147
Heart	Arteria	donor	A	42	0.96506154	0.740039564	1.25853098	0.793436758
Heart	Arteria	donor	A	43	1.233427387	0.951673829	1.60011258	0.109599586
Heart	Arteria	donor	A	44	0.865749401	0.666629691	1.123817767	0.273379493
Heart	Arteria	donor	A	45	1.075198048	0.82783435	1.397118903	0.605276196
Heart	Arteria	donor	A	46	0.77998091	0.59832574	1.01583101	0.058880752
Heart	Arteria	donor	A	47	0.998368262	0.766593042	1.300427061	1
Heart	Arteria	donor	A	48	0.888221384	0.672921962	1.171864043	0.412059001
Heart	Arteria	donor	A	49	1.228849078	0.937227992	1.613041566	0.125222026
Heart	Arteria	donor	A	50	1.02582872	0.785411054	1.340124124	0.895062075
Heart	Arteria	donor	A	51	0.972493415	0.749592665	1.261742261	0.847069737
Heart	Arteria	donor	A	52	1.11177524	0.85595887	1.444961712	0.438172023
Heart	Arteria	donor	A	53	0.94861833	0.728327861	1.235516331	0.695752246
Heart	Arteria	donor	A	54	1.02546154	0.785642413	1.338771957	0.895310126
Heart	Arteria	donor	A	55	0.980930948	0.755002915	1.274531959	0.897166695
Heart	Arteria	donor	A	56	1.01843717	0.777365451	1.33452579	0.894122205
Heart	Arteria	donor	A	57	1.00448781	0.775564454	1.301144928	1
Heart	Arteria	donor	A	58	0.811026878	0.62496367	1.051741231	0.108610326
Heart	Arteria	donor	A	59	0.985101788	0.767741508	1.264095697	0.950806938
Heart	Arteria	donor	A	60	0.948540021	0.724945562	1.241040987	0.691181407
Heart	Arteria	donor	A	61	1.085834445	0.834757747	1.413113879	0.558754087
Heart	Arteria	donor	A	62	0.909369577	0.698724979	1.183212257	0.474816402
Heart	Arteria	donor	A	63	1.207640546	0.929996395	1.569546273	0.156029971
Heart	Arteria	donor	A	64	1.152982002	0.890817217	1.493319393	0.278724075
Heart	Arteria	donor	A	65	0.981361619	0.753972774	1.277399165	0.89651191
Heart	Arteria	donor	A	66	0.859465247	0.654953567	1.127182686	0.28412287
Heart	Arteria	donor	A	67	0.962975048	0.749988759	1.236493182	0.804591055
Heart	Arteria	donor	A	68	0.948392985	0.737939413	1.218850836	0.709587734
Heart	Arteria	donor	A	69	1.217117878	0.93755565	1.581501438	0.138485863
Heart	Arteria	donor	A	70	0.965196801	0.73918746	1.260331832	0.792533047
Heart	Arteria	donor	A	71	1.09070584	0.841665322	1.414089586	0.521869926
Heart	Arteria	donor	A	72	0.764467005	0.585193203	0.9975981	0.042061369
Heart	Arteria	donor	A	73	0.956690691	0.73519719	1.244889391	0.745311886
Heart	Arteria	donor	A	74	1.024385196	0.786316801	1.33481363	0.896037782
Heart	Arteria	donor	A	75	0.837394875	0.644664762	1.087067055	0.176003963
Heart	Arteria	donor	A	76	1.221129631	0.938971019	1.589667635	0.135877866
Heart	Arteria	donor	A	77	1.31312732	1.010757748	1.708080668	0.039009291
Heart	Arteria	donor	A	78	0.956591169	0.736447246	1.242530137	0.746869985
Heart	Arteria	donor	A	79	1.131578489	0.858238275	1.493151638	0.375967162
Heart	Arteria	donor	A	80	0.964012564	0.745726232	1.246268418	0.799627957
Heart	Arteria	donor	A	81	1.005733571	0.77436341	1.30645835	1
Heart	Arteria	donor	A	82	0.902218116	0.694218758	1.172137262	0.438034459
Heart	Arteria	donor	A	83	0.686559366	0.52419135	0.897810609	0.004591758
Heart	Arteria	donor	A	84	0.827708516	0.635046821	1.078061058	0.151481875
Heart	Arteria	donor	A	85	0.91702343	0.7044093	1.193537155	0.515443266
Heart	Arteria	donor	A	86	1.022670113	0.787377213	1.328537259	0.897197964
Heart	Arteria	donor	A	87	1.114556711	0.86212422	1.441699404	0.409463454
Heart	Arteria	donor	A	88	0.964012564	0.745726232	1.246268418	0.799627957
Heart	Arteria	donor	A	89	0.940132326	0.717233863	1.232078371	0.68872665
Heart	Arteria	donor	A	90	0.894109594	0.686971631	1.163383046	0.398317518
Heart	Arteria	donor	A	91	0.964925224	0.740867469	1.256772144	0.794320948
Heart	Arteria	donor	A	92	0.964298401	0.744285475	1.249339413	0.798072323
Heart	Arteria	donor	A	93	1.023687753	0.786750334	1.332255694	0.896509546
Heart	Arteria	donor	A	94	1.007581338	0.772450706	1.314549924	1
Heart	Arteria	donor	A	95	1.131402586	0.870489219	1.471394766	0.364650692
Heart	Arteria	donor	A	96	1.236188117	0.952717462	1.605585672	0.108080913
Heart	Arteria	donor	A	97	1.093338367	0.841765705	1.420792196	0.518246534
Heart	Arteria	donor	A	98	1.339905031	1.022724111	1.758152015	0.028562892
Heart	Arteria	donor	A	99	1.034178184	0.792570938	1.349779418	0.843710457
Heart	Arteria	donor	A	100	0.964012564	0.745726232	1.246268418	0.799627957
Heart	Arteria	donor	C	1	1.236914961	0.682572047	2.265461239	0.481825177
Heart	Arteria	donor	C	2	1.098499406	0.602870334	2.012691218	0.776546835
Heart	Arteria	donor	C	3	1.127574463	0.678774021	1.881583973	0.62820877
Heart	Arteria	donor	C	4	1.359184384	0.863402633	2.156291533	0.189852588
Heart	Arteria	donor	C	5	0.78394053	0.520890308	1.17554795	0.237987583
Heart	Arteria	donor	C	6	1.278176045	0.909759682	1.801076318	0.157971776
Heart	Arteria	donor	C	7	1.103133818	0.816920353	1.490918164	0.5544797
Heart	Arteria	donor	C	8	0.863970779	0.663257438	1.124865986	0.268298729
Heart	Arteria	donor	C	9	1.067681882	0.834746291	1.366080165	0.625901609
Heart	Arteria	donor	C	10	0.979273361	0.758700675	1.264049364	0.899584915
Heart	Arteria	donor	C	11	1.141238975	0.89231557	1.46031655	0.300564029
Heart	Arteria	donor	C	12	1.128754194	0.875333955	1.456299023	0.346062012
Heart	Arteria	donor	C	13	1.008934024	0.784749818	1.297332867	0.950490256
Heart	Arteria	donor	C	14	0.926441194	0.718947829	1.193648051	0.572640941
Heart	Arteria	donor	C	15	0.940648494	0.722350221	1.224671875	0.648572098
Heart	Arteria	donor	C	16	1.108346083	0.861192695	1.427050411	0.417764691
Heart	Arteria	donor	C	17	1.039080253	0.800926848	1.348361507	0.796964986
Heart	Arteria	donor	C	18	0.992355284	0.773885145	1.272551921	0.951020242
Heart	Arteria	donor	C	19	0.925589792	0.714142296	1.199414125	0.564447143
Heart	Arteria	donor	C	20	0.996416916	0.769131823	1.290958386	1
Heart	Arteria	donor	C	21	1.019201534	0.789447841	1.315980896	0.899539219
Heart	Arteria	donor	C	22	1.201546052	0.927935008	1.557173947	0.160493314
Heart	Arteria	donor	C	23	0.956722266	0.734768101	1.245693637	0.744781312
Heart	Arteria	donor	C	24	1.207640546	0.929996395	1.569546273	0.156029971
Heart	Arteria	donor	C	25	0.865406016	0.665974164	1.124026992	0.272380202
Heart	Arteria	donor	C	26	0.77434686	0.597809432	1.002151086	0.048378294
Heart	Arteria	donor	C	27	0.866418365	0.667912987	1.12342344	0.275353278
Heart	Arteria	donor	C	28	1.124760473	0.869314059	1.456041718	0.372897749
Heart	Arteria	donor	C	29	1.059478569	0.813729772	1.379881625	0.695712961
Heart	Arteria	donor	C	30	0.987860245	0.763564234	1.278132637	0.949254559
Heart	Arteria	donor	C	31	0.79003317	0.604136041	1.032155447	0.075354211
Heart	Arteria	donor	C	32	0.854762716	0.661406682	1.104122232	0.2291953
Heart	Arteria	donor	C	33	1.179272875	0.902656184	1.542057307	0.235069359
Heart	Arteria	donor	C	34	1.14161579	0.866172088	1.505847386	0.341025426
Heart	Arteria	donor	C	35	1.036282513	0.79154546	1.357078932	0.790628758
Heart	Arteria	donor	C	36	0.794057877	0.60959761	1.033454754	0.079281036
Heart	Arteria	donor	C	37	0.859120108	0.662073824	1.114286528	0.247604181
Heart	Arteria	donor	C	38	0.94832965	0.720105064	1.248837581	0.734265774
Heart	Arteria	donor	C	39	1.150587711	0.885218673	1.496607238	0.300161677
Heart	Arteria	donor	C	40	0.940896579	0.725560831	1.219942557	0.653363377
Heart	Arteria	donor	C	41	0.96506154	0.740039564	1.25853098	0.793436758
Heart	Arteria	donor	C	42	1.047062273	0.80775909	1.35761573	0.748543992
Heart	Arteria	donor	C	43	0.856850724	0.657974208	1.115249987	0.241652676
Heart	Arteria	donor	C	44	1.25021714	0.962072882	1.626412754	0.092882874
Heart	Arteria	donor	C	45	0.819837294	0.628342316	1.068871204	0.132452515
Heart	Arteria	donor	C	46	0.972598571	0.749242827	1.262605403	0.846757758
Heart	Arteria	donor	C	47	0.717806994	0.550872489	0.934188002	0.011383877
Heart	Arteria	donor	C	48	1.032112938	0.803299922	1.326315804	0.804384989
Heart	Arteria	donor	C	49	0.847004188	0.654504913	1.095554444	0.203407857
Heart	Arteria	donor	C	50	0.924998657	0.711201802	1.202819836	0.559582525
Heart	Arteria	donor	C	51	1.088510404	0.834735468	1.420158487	0.555128768
Heart	Arteria	donor	C	52	1.249437706	0.949014446	1.647105493	0.104425097
Heart	Arteria	donor	C	53	1.029341261	0.783173816	1.353263352	0.839888561
Heart	Arteria	donor	C	54	0.996626461	0.768864173	1.291964182	1
Heart	Arteria	donor	C	55	0.933848118	0.725556451	1.201739388	0.617635672
Heart	Arteria	donor	C	56	0.890037436	0.689396063	1.148756677	0.377023693
Heart	Arteria	donor	C	57	0.798869085	0.616195418	1.034882345	0.084358707
Heart	Arteria	donor	C	58	0.909715277	0.699835117	1.182240062	0.47669481
Heart	Arteria	donor	C	59	1.114970994	0.84980743	1.463911127	0.422066266
Heart	Arteria	donor	C	60	1.089202077	0.834729746	1.421982185	0.554198651
Heart	Arteria	donor	C	61	0.983643096	0.748108075	1.293442084	0.9461569
Heart	Arteria	donor	C	62	0.895039103	0.689331809	1.161828495	0.402294778
Heart	Arteria	donor	C	63	0.865749401	0.666629691	1.123817767	0.273379493
Heart	Arteria	donor	C	64	0.84569848	0.645745015	1.106872829	0.231666323
Heart	Arteria	donor	C	65	0.901171068	0.691290558	1.174359244	0.433105083
Heart	Arteria	donor	C	66	1.296586704	0.996345389	1.689409863	0.051428856
Heart	Arteria	donor	C	67	1.078853751	0.82761399	1.407057709	0.600342296
Heart	Arteria	donor	C	68	0.981361619	0.753972774	1.277399165	0.89651191
Heart	Arteria	donor	C	69	0.750480963	0.573963969	0.980100194	0.030073647
Heart	Arteria	donor	C	70	0.851850218	0.656258732	1.105173124	0.221820485
Heart	Arteria	donor	C	71	0.846187947	0.646567775	1.106764298	0.208822865
Heart	Arteria	donor	C	72	1.221238431	0.934634106	1.597340447	0.146656374
Heart	Arteria	donor	C	73	0.990370024	0.759231809	1.291973816	0.947748363
Heart	Arteria	donor	C	74	0.87152135	0.66928577	1.134310485	0.298004012
Heart	Arteria	donor	C	75	1.238129243	0.949331349	1.616532286	0.115878896
Heart	Arteria	donor	C	76	1.067656883	0.828257143	1.376796331	0.615669428
Heart	Arteria	donor	C	77	1.120003963	0.856904688	1.464946061	0.427546099
Heart	Arteria	donor	C	78	1.232076381	0.951163212	1.597416728	0.110352842
Heart	Arteria	donor	C	79	1.107344363	0.855451065	1.434174621	0.444071414
Heart	Arteria	donor	C	80	0.839121599	0.634971112	1.108068097	0.217208019
Heart	Arteria	donor	C	81	1.065436271	0.821037027	1.383204712	0.652181092
Heart	Arteria	donor	C	82	0.964369152	0.743928784	1.250128511	0.797673062
Heart	Arteria	donor	C	83	1.070508808	0.820430307	1.397475327	0.645495147
Heart	Arteria	donor	C	84	1.130302783	0.875650634	1.459791713	0.344148419
Heart	Arteria	donor	C	85	1.129674757	0.870183566	1.467396343	0.366769238
Heart	Arteria	donor	C	86	1.092803362	0.834701601	1.431502187	0.506829762
Heart	Arteria	donor	C	87	0.858548675	0.653300748	1.127603752	0.281667606
Heart	Arteria	donor	C	88	0.981506844	0.753619431	1.278378127	0.896288847
Heart	Arteria	donor	C	89	0.956782968	0.733890673	1.247329811	0.743702883
Heart	Arteria	donor	C	90	1.0696845	0.82815058	1.38224933	0.61284894
Heart	Arteria	donor	C	91	0.836941292	0.643928667	1.087113811	0.175103719
Heart	Arteria	donor	C	92	0.875440696	0.67733805	1.131075996	0.310825989
Heart	Arteria	donor	C	93	0.876829098	0.670576574	1.145988314	0.322250028
Heart	Arteria	donor	C	94	0.999522502	0.765015841	1.306093715	1
Heart	Arteria	donor	C	95	1.089438954	0.841616094	1.410870945	0.523628232
Heart	Arteria	donor	C	96	1.00522833	0.774878053	1.304266291	1
Heart	Arteria	donor	C	97	0.908037176	0.694553219	1.186754528	0.467941572
Heart	Arteria	donor	C	98	0.94083451	0.724677572	1.221258628	0.652029891
Heart	Arteria	donor	C	99	1.185793363	0.918518027	1.532006183	0.185314454
Heart	Arteria	donor	C	100	0.932031499	0.712270714	1.219353332	0.59633345
Heart	Arteria	donor	G	1	1.122434351	0.839198118	1.502022722	0.431362154
Heart	Arteria	donor	G	2	0.920891675	0.730383101	1.160875156	0.49075298
Heart	Arteria	donor	G	3	1.196738033	0.907475894	1.579963698	0.195592028
Heart	Arteria	donor	G	4	0.948069177	0.715867556	1.255523473	0.729311534
Heart	Arteria	donor	G	5	1.082056314	0.866430326	1.351514364	0.50788906
Heart	Arteria	donor	G	6	0.938825044	0.745835272	1.181659152	0.607543669
Heart	Arteria	donor	G	7	0.941168361	0.732105977	1.209742809	0.663662221
Heart	Arteria	donor	G	8	0.891390005	0.692822901	1.146580295	0.383151822
Heart	Arteria	donor	G	9	0.845024687	0.651152657	1.096016898	0.198892513
Heart	Arteria	donor	G	10	1.055009365	0.814562541	1.366785052	0.701387173
Heart	Arteria	donor	G	11	0.831767384	0.646674796	1.069249581	0.152952656
Heart	Arteria	donor	G	12	0.996837731	0.76858403	1.292979661	1
Heart	Arteria	donor	G	13	1.010188686	0.78385794	1.302082802	0.950016398
Heart	Arteria	donor	G	14	0.986206142	0.766171502	1.269565302	0.950200747
Heart	Arteria	donor	G	15	0.979543219	0.758124503	1.265701627	0.89920293
Heart	Arteria	donor	G	16	0.84287262	0.647587192	1.096467805	0.194207116
Heart	Arteria	donor	G	17	0.893617043	0.685741718	1.164177492	0.396272055
Heart	Arteria	donor	G	18	1.059949969	0.821662472	1.367854225	0.659543526
Heart	Arteria	donor	G	19	1.00376696	0.776283982	1.298073758	1
Heart	Arteria	donor	G	20	1.009933455	0.784042083	1.301104804	0.950113151
Heart	Arteria	donor	G	21	0.83871159	0.646816923	1.086914519	0.178667004
Heart	Arteria	donor	G	22	0.783349421	0.602749857	1.017142127	0.061606452
Heart	Arteria	donor	G	23	0.999383139	0.78022202	1.280225765	1
Heart	Arteria	donor	G	24	1.002154872	0.777807452	1.291410446	1
Heart	Arteria	donor	G	25	1.051415101	0.815204218	1.356396471	0.706000746
Heart	Arteria	donor	G	26	1.087596825	0.841542885	1.406199891	0.526201396
Heart	Arteria	donor	G	27	1.010705903	0.783480813	1.303991331	0.949819828
Heart	Arteria	donor	G	28	1.079813114	0.841195219	1.386660836	0.537263175
Heart	Arteria	donor	G	29	0.853356025	0.658925066	1.104657052	0.225565027
Heart	Arteria	donor	G	30	0.811026878	0.62496367	1.051741231	0.108610326
Heart	Arteria	donor	G	31	0.875440696	0.67733805	1.131075996	0.310825989
Heart	Arteria	donor	G	32	1.030691968	0.794239451	1.337805529	0.846828392
Heart	Arteria	donor	G	33	1.014762598	0.791876961	1.300527035	0.951053704
Heart	Arteria	donor	G	34	0.776204612	0.600196541	1.002967231	0.049701038
Heart	Arteria	donor	G	35	1.048124025	0.815754776	1.346950508	0.71025165
Heart	Arteria	donor	G	36	0.890640397	0.690905433	1.147812925	0.379697427
Heart	Arteria	donor	G	37	0.985728003	0.766827272	1.267170229	0.950465903
Heart	Arteria	donor	G	38	1.005733571	0.77436341	1.30645835	1
Heart	Arteria	donor	G	39	0.90618386	0.706563058	1.161979803	0.424526465
Heart	Arteria	donor	G	40	1.016627298	0.790894268	1.306946304	0.901262372
Heart	Arteria	donor	G	41	0.94110911	0.72960251	1.2137281	0.659635073
Heart	Arteria	donor	G	42	0.985886542	0.766652439	1.267959871	0.950378429
Heart	Arteria	donor	G	43	0.971349094	0.753127697	1.252862703	0.850291838
Heart	Arteria	donor	G	44	0.870492337	0.676025276	1.120515718	0.288286298
Heart	Arteria	donor	G	45	1.069168729	0.828178339	1.38085767	0.613564721
Heart	Arteria	donor	G	46	1.286193028	0.991891006	1.669728044	0.054557696
Heart	Arteria	donor	G	47	1.13408487	0.870964286	1.477741293	0.361399026
Heart	Arteria	donor	G	48	0.816983628	0.629016339	1.060348395	0.122346504
Heart	Arteria	donor	G	49	0.985570278	0.767060159	1.266389122	0.95055248
Heart	Arteria	donor	G	50	1.010446154	0.783670859	1.303085996	0.949918628
Heart	Arteria	donor	G	51	0.883977383	0.686211175	1.13842268	0.347920595
Heart	Arteria	donor	G	52	0.848824273	0.657653202	1.095060617	0.207758084
Heart	Arteria	donor	G	53	0.869971056	0.674966829	1.120926115	0.286529808
Heart	Arteria	donor	G	54	1.034520709	0.802512838	1.333842733	0.801820454
Heart	Arteria	donor	G	55	1.038278118	0.80121277	1.345803093	0.797817643
Heart	Arteria	donor	G	56	1.193623136	0.916543791	1.555965849	0.192216938
Heart	Arteria	donor	G	57	1.185359637	0.913986043	1.538584793	0.199167199
Heart	Arteria	donor	G	58	1.026548918	0.796136403	1.323857201	0.850541347
Heart	Arteria	donor	G	59	1.079148075	0.834803938	1.395606313	0.567991926
Heart	Arteria	donor	G	60	0.851433431	0.662216057	1.094214874	0.214386965
Heart	Arteria	donor	G	61	0.801059041	0.619263756	1.035483258	0.086827275
Heart	Arteria	donor	G	62	1.052215597	0.806378523	1.373412489	0.742468196
Heart	Arteria	donor	G	63	1.115747646	0.856413914	1.454599642	0.432988615
Heart	Arteria	donor	G	64	0.902982152	0.696452664	1.170419042	0.441811018
Heart	Arteria	donor	G	65	1.109667317	0.86139271	1.430139784	0.415978824
Heart	Arteria	donor	G	66	0.872395558	0.679978395	1.118891795	0.268427555
Heart	Arteria	donor	G	67	0.814822824	0.625881717	1.060054576	0.119219452
Heart	Arteria	donor	G	68	0.964649375	0.742453524	1.253374693	0.79603292
Heart	Arteria	donor	G	69	1.026956758	0.784696776	1.344389151	0.842369457
Heart	Arteria	donor	G	70	1.34978013	1.041135436	1.752253755	0.021305343
Heart	Arteria	donor	G	71	1.006509795	0.773565594	1.309830654	1
Heart	Arteria	donor	G	72	1.032112938	0.803299922	1.326315804	0.804384989
Heart	Arteria	donor	G	73	0.963648765	0.747347374	1.242611673	0.801483259
Heart	Arteria	donor	G	74	0.910516565	0.702478497	1.179882095	0.481233036
Heart	Arteria	donor	G	75	0.981217244	0.754321094	1.276431954	0.89673255
Heart	Arteria	donor	G	76	0.910666478	0.702985387	1.179422474	0.482114465
Heart	Arteria	donor	G	77	0.902218116	0.694218758	1.172137262	0.438034459
Heart	Arteria	donor	G	78	0.87152135	0.66928577	1.134310485	0.298004012
Heart	Arteria	donor	G	79	0.776052541	0.603231548	0.997603634	0.046903526
Heart	Arteria	donor	G	80	1.037108023	0.801625191	1.342001423	0.799063031
Heart	Arteria	donor	G	81	0.925766083	0.715068567	1.198321592	0.56600443
Heart	Arteria	donor	G	82	1.153915914	0.89105151	1.495352528	0.277715845
Heart	Arteria	donor	G	83	1.221368385	0.943196215	1.583000753	0.125748238
Heart	Arteria	donor	G	84	1.161929819	0.897959494	1.504551016	0.251903885
Heart	Arteria	donor	G	85	0.923359031	0.703910514	1.210947865	0.59232642
Heart	Arteria	donor	G	86	0.926164244	0.717273019	1.195677781	0.569764326
Heart	Arteria	donor	G	87	0.926375296	0.718537251	1.194148645	0.571932392
Heart	Arteria	donor	G	88	0.990751182	0.758534429	1.294165585	0.947513739
Heart	Arteria	donor	G	89	0.979273361	0.758700675	1.264049364	0.899584915
Heart	Arteria	donor	G	90	0.87461595	0.675617169	1.131809999	0.307993013
Heart	Arteria	donor	G	91	1.045348307	0.808205391	1.352389538	0.750582079
Heart	Arteria	donor	G	92	1.291273165	0.99405138	1.679352981	0.052999702
Heart	Arteria	donor	G	93	1.185793363	0.918518027	1.532006183	0.185314454
Heart	Arteria	donor	G	94	1.191200271	0.920266668	1.543171616	0.180836247
Heart	Arteria	donor	G	95	0.820448142	0.634196081	1.060726608	0.1276441
Heart	Arteria	donor	G	96	1.02509862	0.785870467	1.337436188	0.8955554
Heart	Arteria	donor	G	97	0.948293314	0.7391837	1.216525662	0.711491855
Heart	Arteria	donor	G	98	1.113831703	0.862016411	1.43999086	0.410420171
Heart	Arteria	donor	G	99	1.012592039	0.782064939	1.311297938	0.949098166
Heart	Arteria	donor	G	100	1.037108023	0.801625191	1.342001423	0.799063031
Heart	Arteria	donor	T	1	0.660017401	0.383413963	1.121407581	0.129033339
Heart	Arteria	donor	T	2	1.130550812	0.903441053	1.415030538	0.290209422
Heart	Arteria	donor	T	3	0.913884196	0.728307809	1.146562642	0.431101786
Heart	Arteria	donor	T	4	1.095251557	0.766445493	1.567417613	0.662704757
Heart	Arteria	donor	T	5	1.10475393	0.79392471	1.539245494	0.571007964
Heart	Arteria	donor	T	6	0.97768856	0.774928441	1.233489564	0.862802205
Heart	Arteria	donor	T	7	1.000757516	0.789426487	1.268752936	1
Heart	Arteria	donor	T	8	1.044112439	0.808521215	1.348645763	0.752055504
Heart	Arteria	donor	T	9	0.977568376	0.762033429	1.254146079	0.901883387
Heart	Arteria	donor	T	10	1.021452552	0.79824642	1.307208451	0.902845232
Heart	Arteria	donor	T	11	0.857301958	0.666018028	1.103031059	0.236125157
Heart	Arteria	donor	T	12	0.927502884	0.72841363	1.180841864	0.549821526
Heart	Arteria	donor	T	13	1.131967208	0.880978394	1.455229716	0.321768613
Heart	Arteria	donor	T	14	0.969194774	0.758455572	1.23854555	0.808342043
Heart	Arteria	donor	T	15	1.085628335	0.852663912	1.382625094	0.510681754
Heart	Arteria	donor	T	16	1.165575481	0.915706265	1.484397712	0.209797501
Heart	Arteria	donor	T	17	1.03272848	0.810992141	1.31525773	0.810831661
Heart	Arteria	donor	T	18	0.920656832	0.721340011	1.174828029	0.506856975
Heart	Arteria	donor	T	19	1.060390889	0.82855695	1.357589006	0.668949007
Heart	Arteria	donor	T	20	1.123198262	0.883198151	1.428963917	0.341046976
Heart	Arteria	donor	T	21	1.349324841	1.055700514	1.726309823	0.015355468
Heart	Arteria	donor	T	22	0.920316428	0.719091728	1.177614576	0.502507982
Heart	Arteria	donor	T	23	1.133813746	0.886013643	1.451633388	0.328740157
Heart	Arteria	donor	T	24	0.852322859	0.663806524	1.093882328	0.216770882
Heart	Arteria	donor	T	25	0.985257189	0.767517221	1.264851983	0.950722986
Heart	Arteria	donor	T	26	0.962354871	0.75205642	1.231502365	0.760531794
Heart	Arteria	donor	T	27	1.117644842	0.87302539	1.43141914	0.392035552
Heart	Arteria	donor	T	28	0.863582235	0.670463669	1.111900199	0.260423248
Heart	Arteria	donor	T	29	1.018530976	0.799284707	1.298017836	0.90446414
Heart	Arteria	donor	T	30	1.027751038	0.804589732	1.31296988	0.855734332
Heart	Arteria	donor	T	31	1.015022299	0.791743889	1.301424005	0.950972286
Heart	Arteria	donor	T	32	0.968578771	0.759676488	1.23497865	0.809936842
Heart	Arteria	donor	T	33	0.905590431	0.70453245	1.163795413	0.456356397
Heart	Arteria	donor	T	34	1.094165216	0.858969385	1.394228829	0.472057413
Heart	Arteria	donor	T	35	1.04932546	0.815558887	1.350382011	0.708697754
Heart	Arteria	donor	T	36	1.278125288	0.995124926	1.643164074	0.048244753
Heart	Arteria	donor	T	37	1.009180742	0.784577156	1.298259631	0.950397441
Heart	Arteria	donor	T	38	0.995369445	0.783124582	1.265220094	1
Heart	Arteria	donor	T	39	0.9411332	0.730343843	1.212561974	0.660814733
Heart	Arteria	donor	T	40	0.955452312	0.745286914	1.224951026	0.712671072
Heart	Arteria	donor	T	41	1.02986266	0.803990899	1.319385898	0.854132759
Heart	Arteria	donor	T	42	1.003064578	0.776954303	1.295117235	1
Heart	Arteria	donor	T	43	0.971349094	0.753127697	1.252862703	0.850291838
Heart	Arteria	donor	T	44	1.070206371	0.828122089	1.383660678	0.612125903
Heart	Arteria	donor	T	45	1.047731803	0.815817275	1.345834332	0.71075929
Heart	Arteria	donor	T	46	1.015022299	0.791743889	1.301424005	0.950972286
Heart	Arteria	donor	T	47	1.19720017	0.937924821	1.529066876	0.147269285
Heart	Arteria	donor	T	48	1.281864171	1	1.644736478	0.049577677
Heart	Arteria	donor	T	49	0.99479831	0.771141677	1.283448141	1
Heart	Arteria	donor	T	50	1.038837992	0.809788203	1.332894016	0.758360896
Heart	Arteria	donor	T	51	1.075337872	0.83481313	1.385741125	0.573361783
Heart	Arteria	donor	T	52	0.88720139	0.694140288	1.133654837	0.331868391
Heart	Arteria	donor	T	53	1.164987476	0.91174105	1.489383712	0.225056355
Heart	Arteria	donor	T	54	0.948457078	0.736955583	1.220634507	0.708108535
Heart	Arteria	donor	T	55	1.054541874	0.81464779	1.365410318	0.701985019
Heart	Arteria	donor	T	56	0.941103705	0.736093577	1.202997502	0.627072641
Heart	Arteria	donor	T	57	1.050988066	0.815277987	1.355162393	0.706551183
Heart	Arteria	donor	T	58	1.305499359	1.010725961	1.688121201	0.037319071
Heart	Arteria	donor	T	59	0.854762716	0.661406682	1.104122232	0.2291953
Heart	Arteria	donor	T	60	1.13735244	0.886926208	1.459267334	0.324763045
Heart	Arteria	donor	T	61	1.153140632	0.904014967	1.471658951	0.252364801
Heart	Arteria	donor	T	62	1.146510272	0.897984453	1.46452422	0.276385995
Heart	Arteria	donor	T	63	0.873446952	0.682234789	1.117927947	0.272124415
Heart	Arteria	donor	T	64	1.109611896	0.866577185	1.421384128	0.426363145
Heart	Arteria	donor	T	65	1.008689332	0.784919674	1.296415377	0.950582119
Heart	Arteria	donor	T	66	1.032783903	0.803085033	1.328403936	0.803670944
Heart	Arteria	donor	T	67	1.174866821	0.910763173	1.516676074	0.208498278
Heart	Arteria	donor	T	68	1.113115813	0.861909772	1.438223338	0.411368083
Heart	Arteria	donor	T	69	1.0469725	0.822759153	1.332504498	0.720336137
Heart	Arteria	donor	T	70	0.906506077	0.707713261	1.160920729	0.426677687
Heart	Arteria	donor	T	71	1.057574403	0.828620457	1.350226592	0.672351366
Heart	Arteria	donor	T	72	1.031782298	0.803404419	1.325289855	0.804736594
Heart	Arteria	donor	T	73	1.087834669	0.84761682	1.396658594	0.497742496
Heart	Arteria	donor	T	74	1.202692748	0.940026411	1.53977544	0.143509522
Heart	Arteria	donor	T	75	0.990773122	0.775504935	1.265903496	0.951680232
Heart	Arteria	donor	T	76	0.847750668	0.655787303	1.095360441	0.205167489
Heart	Arteria	donor	T	77	0.783627518	0.613305406	1.000626849	0.046062035
Heart	Arteria	donor	T	78	0.970116499	0.756359042	1.24430657	0.805761666
Heart	Arteria	donor	T	79	1.055591616	0.822133696	1.355674928	0.665559007
Heart	Arteria	donor	T	80	1.147215657	0.898192835	1.465991159	0.275648469
Heart	Arteria	donor	T	81	1.008934024	0.784749818	1.297332867	0.950490256
Heart	Arteria	donor	T	82	0.993644816	0.772501554	1.278223009	1
Heart	Arteria	donor	T	83	1.080803269	0.846938032	1.379643997	0.546022933
Heart	Arteria	donor	T	84	0.911750183	0.706795066	1.175880225	0.488867648
Heart	Arteria	donor	T	85	1.032434234	0.811039837	1.314371382	0.811097425
Heart	Arteria	donor	T	86	0.977057824	0.762931352	1.251363111	0.854465828
Heart	Arteria	donor	T	87	1.105796876	0.860802778	1.421103267	0.421240044
Heart	Arteria	donor	T	88	1.05956595	0.828579435	1.355419837	0.669945102
Heart	Arteria	donor	T	89	1.113988761	0.872241054	1.42330915	0.396524185
Heart	Arteria	donor	T	90	1.183730547	0.91785047	1.527751709	0.187062012
Heart	Arteria	donor	T	91	1.164815521	0.907664412	1.49569961	0.21799526
Heart	Arteria	donor	T	92	0.926236851	0.717697159	1.195163444	0.570494166
Heart	Arteria	donor	T	93	0.934113755	0.729315385	1.19623855	0.582122343
Heart	Arteria	donor	T	94	0.849553936	0.665323922	1.08438524	0.183975738
Heart	Arteria	donor	T	95	0.994602695	0.771376588	1.282552093	1
Heart	Arteria	donor	T	96	0.804311843	0.627855414	1.029789912	0.076556099
Heart	Arteria	donor	T	97	1.059949969	0.821662472	1.367854225	0.659543526
Heart	Arteria	donor	T	98	0.745583536	0.581436245	0.955273156	0.01702961
Heart	Arteria	donor	T	99	0.811597068	0.630177716	1.044602717	0.104605068
Heart	Arteria	donor	T	100	1.063416218	0.828451535	1.365514644	0.621619556
iPSC-CVPC	Arteria	donor	A	1	0.70224821	0.608886421	0.810476481	1.02E-06
iPSC-CVPC	Arteria	donor	A	2	0.415263954	0.339476434	0.507362794	1.59E-18
iPSC-CVPC	Arteria	donor	A	3	1.109814307	1.014708402	1.214160932	0.021747345
iPSC-CVPC	Arteria	donor	A	4	1.311715774	1.204921596	1.42801999	2.67E-10
iPSC-CVPC	Arteria	donor	A	5	1.151417983	1.05303975	1.259320631	0.001859447
iPSC-CVPC	Arteria	donor	A	6	0.941431243	0.838576899	1.057564351	0.304648583
iPSC-CVPC	Arteria	donor	A	7	1.105092255	1.001994728	1.21939988	0.044250717
iPSC-CVPC	Arteria	donor	A	8	1.112289452	1.010087551	1.225358727	0.029792502
iPSC-CVPC	Arteria	donor	A	9	1.085008341	0.981767112	1.199575656	0.108734125
iPSC-CVPC	Arteria	donor	A	10	1.118973407	1.011653217	1.238358694	0.028259298
iPSC-CVPC	Arteria	donor	A	11	1.02749657	0.929194667	1.136726982	0.612432182
iPSC-CVPC	Arteria	donor	A	12	1.027104256	0.930439628	1.134286732	0.601020295
iPSC-CVPC	Arteria	donor	A	13	1.041858275	0.941733766	1.153147365	0.43090995
iPSC-CVPC	Arteria	donor	A	14	1.082749515	0.978510653	1.198619092	0.121681158
iPSC-CVPC	Arteria	donor	A	15	1.069810471	0.965551899	1.185897483	0.198434938
iPSC-CVPC	Arteria	donor	A	16	1.010399928	0.913431184	1.118137465	0.858646478
iPSC-CVPC	Arteria	donor	A	17	1.013687286	0.917119642	1.120882032	0.800745468
iPSC-CVPC	Arteria	donor	A	18	1.078038921	0.973764323	1.194004705	0.146019342
iPSC-CVPC	Arteria	donor	A	19	1.095869372	0.990119603	1.213441556	0.075360232
iPSC-CVPC	Arteria	donor	A	20	1.031901443	0.932465213	1.142430592	0.557502854
iPSC-CVPC	Arteria	donor	A	21	1.059550898	0.957750606	1.17267174	0.264357251
iPSC-CVPC	Arteria	donor	A	22	1.089728996	0.984373107	1.206873763	0.097820184
iPSC-CVPC	Arteria	donor	A	23	0.948659963	0.859488099	1.04745467	0.293543381
iPSC-CVPC	Arteria	donor	A	24	1.076366226	0.974722807	1.189038623	0.142134072
iPSC-CVPC	Arteria	donor	A	25	1.061609871	0.962340917	1.171540985	0.236542914
iPSC-CVPC	Arteria	donor	A	26	1.018891986	0.922316063	1.126010964	0.725371287
iPSC-CVPC	Arteria	donor	A	27	1.062836548	0.961339048	1.175526052	0.236257047
iPSC-CVPC	Arteria	donor	A	28	1.037264125	0.938573486	1.146783233	0.48114346
iPSC-CVPC	Arteria	donor	A	29	1.006862913	0.911746803	1.112382672	0.900403014
iPSC-CVPC	Arteria	donor	A	30	1.095331135	0.991129495	1.211000253	0.07143912
iPSC-CVPC	Arteria	donor	A	31	1.073648251	0.969516177	1.189544489	0.175021229
iPSC-CVPC	Arteria	donor	A	32	1.034602703	0.936480471	1.143472253	0.514331466
iPSC-CVPC	Arteria	donor	A	33	1.030197566	0.933625692	1.137190793	0.552054106
iPSC-CVPC	Arteria	donor	A	34	1.03590285	0.939241993	1.142944746	0.48990754
iPSC-CVPC	Arteria	donor	A	35	1.085817508	0.984342861	1.198203141	0.099228799
iPSC-CVPC	Arteria	donor	A	36	1.019409568	0.924227394	1.124809354	0.710960278
iPSC-CVPC	Arteria	donor	A	37	1.060241165	0.960563068	1.170700438	0.243837535
iPSC-CVPC	Arteria	donor	A	38	0.992215733	0.899746938	1.094625691	0.882113881
iPSC-CVPC	Arteria	donor	A	39	1.022677971	0.926653167	1.129139724	0.672715383
iPSC-CVPC	Arteria	donor	A	40	1.086905278	0.985397629	1.199290668	0.094618643
iPSC-CVPC	Arteria	donor	A	41	1.082424246	0.979521695	1.196576271	0.120559976
iPSC-CVPC	Arteria	donor	A	42	1.072681856	0.971783059	1.184474918	0.1650057
iPSC-CVPC	Arteria	donor	A	43	1.054546868	0.95528787	1.164588503	0.296724976
iPSC-CVPC	Arteria	donor	A	44	1.069664059	0.969684706	1.180387537	0.175475736
iPSC-CVPC	Arteria	donor	A	45	1.092571572	0.990651666	1.205412342	0.077228628
iPSC-CVPC	Arteria	donor	A	46	1.025785536	0.929894041	1.13202209	0.620881231
iPSC-CVPC	Arteria	donor	A	47	1.111441429	1.006483593	1.227998752	0.034816912
iPSC-CVPC	Arteria	donor	A	48	0.968722559	0.879491045	1.067395899	0.524964292
iPSC-CVPC	Arteria	donor	A	49	1.069424693	0.970444034	1.178913843	0.172080784
iPSC-CVPC	Arteria	donor	A	50	0.991111903	0.897623685	1.094770991	0.86095523
iPSC-CVPC	Arteria	donor	A	51	0.961539486	0.872923572	1.059484427	0.433576787
iPSC-CVPC	Arteria	donor	A	52	1.03637636	0.940114406	1.142944363	0.476591025
iPSC-CVPC	Arteria	donor	A	53	1.051687124	0.953599003	1.16030117	0.312896051
iPSC-CVPC	Arteria	donor	A	54	1.046333056	0.949582155	1.153342469	0.366430485
iPSC-CVPC	Arteria	donor	A	55	1.007305351	0.913856586	1.110681325	0.902249744
iPSC-CVPC	Arteria	donor	A	56	1.131743721	1.026069928	1.248894054	0.012438264
iPSC-CVPC	Arteria	donor	A	57	0.983741236	0.893456287	1.08354631	0.751745324
iPSC-CVPC	Arteria	donor	A	58	1.046145385	0.947858503	1.155080226	0.371720846
iPSC-CVPC	Arteria	donor	A	59	1.066336407	0.966381573	1.17705684	0.198827973
iPSC-CVPC	Arteria	donor	A	60	1.012533514	0.91932217	1.115592104	0.807563513
iPSC-CVPC	Arteria	donor	A	61	1.081657168	0.981892826	1.191927827	0.109130923
iPSC-CVPC	Arteria	donor	A	62	1.062339291	0.963285493	1.1719933	0.228327872
iPSC-CVPC	Arteria	donor	A	63	1.073034717	0.974452068	1.181973314	0.153373965
iPSC-CVPC	Arteria	donor	A	64	0.980469135	0.890295823	1.080172535	0.696323526
iPSC-CVPC	Arteria	donor	A	65	1.18503829	1.074401667	1.307624279	0.000581381
iPSC-CVPC	Arteria	donor	A	66	1.034392744	0.937667751	1.141534627	0.504582874
iPSC-CVPC	Arteria	donor	A	67	1.047137989	0.949717035	1.154992958	0.363409606
iPSC-CVPC	Arteria	donor	A	68	1.069531565	0.970234946	1.179410493	0.178379527
iPSC-CVPC	Arteria	donor	A	69	1.141829303	1.035921514	1.259123928	0.006944079
iPSC-CVPC	Arteria	donor	A	70	0.994582698	0.90265883	1.096287015	0.921939781
iPSC-CVPC	Arteria	donor	A	71	1.07257775	0.973515621	1.182116744	0.158181521
iPSC-CVPC	Arteria	donor	A	72	1.016958811	0.923184751	1.120639889	0.751188957
iPSC-CVPC	Arteria	donor	A	73	0.972364192	0.881536469	1.073009331	0.585166864
iPSC-CVPC	Arteria	donor	A	74	1.085935857	0.984895454	1.1977294	0.09594818
iPSC-CVPC	Arteria	donor	A	75	1.059699874	0.961221792	1.168674	0.249409518
iPSC-CVPC	Arteria	donor	A	76	1.076091587	0.97477079	1.188367171	0.143294796
iPSC-CVPC	Arteria	donor	A	77	1.053349741	0.955987669	1.161033548	0.294446725
iPSC-CVPC	Arteria	donor	A	78	1.192846215	1.082229672	1.315345998	0.000335794
iPSC-CVPC	Arteria	donor	A	79	0.998433455	0.905634586	1.101099906	0.980359769
iPSC-CVPC	Arteria	donor	A	80	1.052917573	0.956029328	1.160021398	0.296657938
iPSC-CVPC	Arteria	donor	A	81	1.101732777	0.998601985	1.216072397	0.051718489
iPSC-CVPC	Arteria	donor	A	82	0.989289591	0.897929674	1.090338582	0.82565107
iPSC-CVPC	Arteria	donor	A	83	1.158920571	1.050421587	1.279217265	0.003004946
iPSC-CVPC	Arteria	donor	A	84	1.036827479	0.941149246	1.142618733	0.464786693
iPSC-CVPC	Arteria	donor	A	85	1.012533514	0.91932217	1.115592104	0.807563513
iPSC-CVPC	Arteria	donor	A	86	1.085597117	0.985292126	1.196534617	0.098147248
iPSC-CVPC	Arteria	donor	A	87	1.077636897	0.978041763	1.187770774	0.131263471
iPSC-CVPC	Arteria	donor	A	88	1.091328344	0.989350807	1.204244267	0.080872992
iPSC-CVPC	Arteria	donor	A	89	1.102646473	1.000462571	1.215862466	0.048338803
iPSC-CVPC	Arteria	donor	A	90	0.999592043	0.909087748	1.099457	1
iPSC-CVPC	Arteria	donor	A	91	1.088663268	0.987406054	1.200712299	0.086682353
iPSC-CVPC	Arteria	donor	A	92	1.018450847	0.924271504	1.122620631	0.713747215
iPSC-CVPC	Arteria	donor	A	93	1.094083561	0.993227837	1.205586799	0.069014341
iPSC-CVPC	Arteria	donor	A	94	1.16129588	1.053339951	1.280890143	0.00234726
iPSC-CVPC	Arteria	donor	A	95	1.111052088	1.007124748	1.226304731	0.034434379
iPSC-CVPC	Arteria	donor	A	96	1.018533108	0.924596059	1.122403287	0.714481063
iPSC-CVPC	Arteria	donor	A	97	1.052926111	0.956320374	1.159678934	0.298103352
iPSC-CVPC	Arteria	donor	A	98	1.052357002	0.95474718	1.160366884	0.304036364
iPSC-CVPC	Arteria	donor	A	99	1.046175613	0.94910007	1.153590909	0.364750884
iPSC-CVPC	Arteria	donor	A	100	0.943445348	0.857153137	1.03874031	0.233702322
iPSC-CVPC	Arteria	donor	C	1	0.690226272	0.562211332	0.848499744	0.000371291
iPSC-CVPC	Arteria	donor	C	2	0.498516663	0.401308347	0.61911009	1.50E-10
iPSC-CVPC	Arteria	donor	C	3	0.513599149	0.426907388	0.617865292	7.53E-13
iPSC-CVPC	Arteria	donor	C	4	0.758710191	0.651598049	0.884137797	0.000352154
iPSC-CVPC	Arteria	donor	C	5	0.695266065	0.603673119	0.80123466	4.15E-07
iPSC-CVPC	Arteria	donor	C	6	0.907294274	0.797080881	1.033596174	0.138360032
iPSC-CVPC	Arteria	donor	C	7	0.89437337	0.801546135	0.99840951	0.044600273
iPSC-CVPC	Arteria	donor	C	8	0.946350744	0.855586755	1.047155009	0.283177852
iPSC-CVPC	Arteria	donor	C	9	0.886461452	0.805063403	0.976346571	0.013345117
iPSC-CVPC	Arteria	donor	C	10	0.951965013	0.862650097	1.050860818	0.330451312
iPSC-CVPC	Arteria	donor	C	11	0.933035387	0.846006061	1.029373535	0.164207212
iPSC-CVPC	Arteria	donor	C	12	0.936526132	0.848642203	1.033889368	0.193729389
iPSC-CVPC	Arteria	donor	C	13	0.91483526	0.829820584	1.008850603	0.074479846
iPSC-CVPC	Arteria	donor	C	14	0.902691745	0.818572232	0.995750097	0.039025824
iPSC-CVPC	Arteria	donor	C	15	0.948687003	0.860152754	1.046696853	0.285937135
iPSC-CVPC	Arteria	donor	C	16	0.952525905	0.86326785	1.051343916	0.331156365
iPSC-CVPC	Arteria	donor	C	17	0.966407708	0.87500903	1.067820409	0.497221236
iPSC-CVPC	Arteria	donor	C	18	0.892117993	0.808977393	0.984069494	0.022034349
iPSC-CVPC	Arteria	donor	C	19	0.920697692	0.834971995	1.015577678	0.096391443
iPSC-CVPC	Arteria	donor	C	20	0.937166843	0.849192407	1.03463443	0.193667521
iPSC-CVPC	Arteria	donor	C	21	1.001813146	0.90573862	1.108551944	0.979712386
iPSC-CVPC	Arteria	donor	C	22	0.934967543	0.844672083	1.035303226	0.189105575
iPSC-CVPC	Arteria	donor	C	23	1.013068869	0.913190425	1.124410493	0.813879666
iPSC-CVPC	Arteria	donor	C	24	0.971438167	0.878962351	1.074118986	0.577720678
iPSC-CVPC	Arteria	donor	C	25	0.830367681	0.752099577	0.917021002	0.000220187
iPSC-CVPC	Arteria	donor	C	26	0.905722724	0.819545001	1.001344016	0.050284763
iPSC-CVPC	Arteria	donor	C	27	0.95987026	0.867943654	1.0618994	0.429656867
iPSC-CVPC	Arteria	donor	C	28	0.938596739	0.850605163	1.036068258	0.203085461
iPSC-CVPC	Arteria	donor	C	29	0.95632867	0.865634217	1.05689779	0.377301879
iPSC-CVPC	Arteria	donor	C	30	0.923544639	0.835676217	1.02100048	0.115594159
iPSC-CVPC	Arteria	donor	C	31	0.870830028	0.788876524	0.961595648	0.006032107
iPSC-CVPC	Arteria	donor	C	32	0.90858707	0.823503919	1.002757545	0.054393722
iPSC-CVPC	Arteria	donor	C	33	0.953718238	0.86325	1.054032931	0.350395736
iPSC-CVPC	Arteria	donor	C	34	0.944582768	0.853971431	1.045220672	0.271673761
iPSC-CVPC	Arteria	donor	C	35	0.946003477	0.85554883	1.046427265	0.273499484
iPSC-CVPC	Arteria	donor	C	36	0.98857031	0.893328529	1.094445073	0.837774068
iPSC-CVPC	Arteria	donor	C	37	0.92205095	0.834347803	1.019363699	0.109848927
iPSC-CVPC	Arteria	donor	C	38	0.948684599	0.857505859	1.049992988	0.30559904
iPSC-CVPC	Arteria	donor	C	39	0.885426961	0.800427687	0.979784183	0.018068905
iPSC-CVPC	Arteria	donor	C	40	0.885184007	0.800795643	0.978796307	0.016494592
iPSC-CVPC	Arteria	donor	C	41	0.905031893	0.818364415	1.001219115	0.051749483
iPSC-CVPC	Arteria	donor	C	42	0.871525669	0.789280673	0.962642898	0.006360842
iPSC-CVPC	Arteria	donor	C	43	0.943141525	0.852371555	1.043997555	0.258982876
iPSC-CVPC	Arteria	donor	C	44	0.973552085	0.879987869	1.077560668	0.609126602
iPSC-CVPC	Arteria	donor	C	45	0.950029084	0.85949597	1.05046867	0.310286896
iPSC-CVPC	Arteria	donor	C	46	0.959271288	0.866735171	1.062124103	0.425897065
iPSC-CVPC	Arteria	donor	C	47	0.931953648	0.843046715	1.030653254	0.169383586
iPSC-CVPC	Arteria	donor	C	48	1.034676226	0.93563883	1.144678685	0.510351017
iPSC-CVPC	Arteria	donor	C	49	0.923269524	0.83461865	1.021713215	0.117977999
iPSC-CVPC	Arteria	donor	C	50	0.830760251	0.752143403	0.917843572	0.000229531
iPSC-CVPC	Arteria	donor	C	51	0.884341578	0.800623608	0.97712	0.015065891
iPSC-CVPC	Arteria	donor	C	52	0.967894492	0.875740685	1.070226037	0.526716624
iPSC-CVPC	Arteria	donor	C	53	0.962813582	0.870315446	1.065506761	0.458657131
iPSC-CVPC	Arteria	donor	C	54	0.928937441	0.840056946	1.027641862	0.152751028
iPSC-CVPC	Arteria	donor	C	55	0.983629922	0.888732072	1.089144984	0.758323967
iPSC-CVPC	Arteria	donor	C	56	0.965134405	0.873580754	1.066761986	0.47999493
iPSC-CVPC	Arteria	donor	C	57	0.839941149	0.760331736	0.92815364	0.000541502
iPSC-CVPC	Arteria	donor	C	58	0.909663193	0.824659236	1.003751646	0.058147176
iPSC-CVPC	Arteria	donor	C	59	0.924407742	0.836762292	1.021584532	0.122898128
iPSC-CVPC	Arteria	donor	C	60	0.913871047	0.827341721	1.009813446	0.076853767
iPSC-CVPC	Arteria	donor	C	61	0.919246148	0.83158324	1.016512929	0.098068941
iPSC-CVPC	Arteria	donor	C	62	0.939760649	0.850802011	1.03841637	0.216693776
iPSC-CVPC	Arteria	donor	C	63	0.908507896	0.820220528	1.00665822	0.065072082
iPSC-CVPC	Arteria	donor	C	64	0.931239182	0.84288427	1.029260929	0.156627166
iPSC-CVPC	Arteria	donor	C	65	0.905611858	0.820041249	1.000424563	0.049125181
iPSC-CVPC	Arteria	donor	C	66	1.001304927	0.906114248	1.106949947	1
iPSC-CVPC	Arteria	donor	C	67	0.937412588	0.849310642	1.035035274	0.201741878
iPSC-CVPC	Arteria	donor	C	68	0.989277659	0.894615197	1.094421333	0.838933815
iPSC-CVPC	Arteria	donor	C	69	0.910051093	0.822621482	1.007109193	0.064690922
iPSC-CVPC	Arteria	donor	C	70	0.920721615	0.832751429	1.018370688	0.108108705
iPSC-CVPC	Arteria	donor	C	71	0.864605174	0.782768933	0.955282259	0.003852477
iPSC-CVPC	Arteria	donor	C	72	0.944734742	0.856125196	1.042909011	0.261240382
iPSC-CVPC	Arteria	donor	C	73	0.953443038	0.862417318	1.054458445	0.347161794
iPSC-CVPC	Arteria	donor	C	74	0.950381899	0.85917747	1.051655788	0.318959504
iPSC-CVPC	Arteria	donor	C	75	0.962488082	0.870141858	1.064996893	0.459205683
iPSC-CVPC	Arteria	donor	C	76	0.879744912	0.796354623	0.972178345	0.011197872
iPSC-CVPC	Arteria	donor	C	77	0.945327312	0.854970399	1.045639168	0.273542751
iPSC-CVPC	Arteria	donor	C	78	0.911545606	0.824574916	1.008078192	0.070313577
iPSC-CVPC	Arteria	donor	C	79	0.963072172	0.871530765	1.064539443	0.46376308
iPSC-CVPC	Arteria	donor	C	80	0.898648268	0.813497334	0.99299934	0.035615867
iPSC-CVPC	Arteria	donor	C	81	0.837040662	0.759240488	0.923046765	0.000333386
iPSC-CVPC	Arteria	donor	C	82	0.936289276	0.846989216	1.03541477	0.19478642
iPSC-CVPC	Arteria	donor	C	83	0.887022596	0.802008394	0.98138772	0.019571688
iPSC-CVPC	Arteria	donor	C	84	0.901354301	0.815632473	0.996456589	0.042022554
iPSC-CVPC	Arteria	donor	C	85	0.902664961	0.817294873	0.997306746	0.043275187
iPSC-CVPC	Arteria	donor	C	86	0.967775922	0.874817955	1.071113366	0.522924059
iPSC-CVPC	Arteria	donor	C	87	0.916079004	0.828902744	1.012815867	0.084036743
iPSC-CVPC	Arteria	donor	C	88	0.939912213	0.849825974	1.039965993	0.229808221
iPSC-CVPC	Arteria	donor	C	89	0.858518587	0.777668719	0.948057162	0.002460855
iPSC-CVPC	Arteria	donor	C	90	0.959662107	0.867123778	1.06245124	0.426401011
iPSC-CVPC	Arteria	donor	C	91	0.905387382	0.819795871	1.000206404	0.049008022
iPSC-CVPC	Arteria	donor	C	92	0.874610855	0.79229906	0.965769849	0.007599219
iPSC-CVPC	Arteria	donor	C	93	0.84369257	0.764218873	0.931719173	0.000710204
iPSC-CVPC	Arteria	donor	C	94	0.846590864	0.766158127	0.935775603	0.001006474
iPSC-CVPC	Arteria	donor	C	95	0.867759375	0.785327703	0.959153226	0.005117945
iPSC-CVPC	Arteria	donor	C	96	0.899481065	0.814264733	0.993916318	0.03567517
iPSC-CVPC	Arteria	donor	C	97	0.913704392	0.826597807	1.010357309	0.074814674
iPSC-CVPC	Arteria	donor	C	98	0.877036907	0.794184548	0.968835769	0.00921994
iPSC-CVPC	Arteria	donor	C	99	0.941473428	0.85236751	1.040289888	0.236097402
iPSC-CVPC	Arteria	donor	C	100	0.851853553	0.771730486	0.940600942	0.001365762
iPSC-CVPC	Arteria	donor	G	1	1.588887703	1.431608979	1.7630977	2.05E-18
iPSC-CVPC	Arteria	donor	G	2	1.13191378	1.039333513	1.232928465	0.004028119
iPSC-CVPC	Arteria	donor	G	3	0.925709651	0.832833259	1.029404441	0.154796515
iPSC-CVPC	Arteria	donor	G	4	0.884895836	0.798444772	0.981092253	0.019752374
iPSC-CVPC	Arteria	donor	G	5	1.036592894	0.953078943	1.127465795	0.408448484
iPSC-CVPC	Arteria	donor	G	6	1.073242394	0.986148547	1.16818452	0.100456927
iPSC-CVPC	Arteria	donor	G	7	0.89695408	0.815186071	0.987200367	0.025359848
iPSC-CVPC	Arteria	donor	G	8	0.893193438	0.812168815	0.982576669	0.018987389
iPSC-CVPC	Arteria	donor	G	9	0.954006577	0.864897898	1.052616752	0.34544319
iPSC-CVPC	Arteria	donor	G	10	0.955213101	0.867339113	1.052309403	0.353036659
iPSC-CVPC	Arteria	donor	G	11	0.940553578	0.854703899	1.035358436	0.207125639
iPSC-CVPC	Arteria	donor	G	12	0.976019413	0.885984274	1.075581679	0.624480026
iPSC-CVPC	Arteria	donor	G	13	0.958602333	0.870286578	1.056174696	0.391878694
iPSC-CVPC	Arteria	donor	G	14	0.965553023	0.875302398	1.06555242	0.48673035
iPSC-CVPC	Arteria	donor	G	15	0.905242385	0.822312187	0.996778008	0.040351364
iPSC-CVPC	Arteria	donor	G	16	0.887089017	0.804773702	0.9781187	0.015171901
iPSC-CVPC	Arteria	donor	G	17	0.922710025	0.83739787	1.0170417	0.104063134
iPSC-CVPC	Arteria	donor	G	18	0.925909559	0.84046728	1.020399019	0.115834929
iPSC-CVPC	Arteria	donor	G	19	0.996516516	0.903623435	1.099321407	0.940951869
iPSC-CVPC	Arteria	donor	G	20	1.024191085	0.927944106	1.130850761	0.63671263
iPSC-CVPC	Arteria	donor	G	21	0.8939678	0.811948288	0.984595415	0.021406435
iPSC-CVPC	Arteria	donor	G	22	0.877846327	0.798281166	0.965553193	0.006782832
iPSC-CVPC	Arteria	donor	G	23	0.91780177	0.83543562	1.00853673	0.073422221
iPSC-CVPC	Arteria	donor	G	24	0.879850482	0.800299709	0.967545725	0.007982963
iPSC-CVPC	Arteria	donor	G	25	0.935994758	0.849631081	1.031465964	0.176997101
iPSC-CVPC	Arteria	donor	G	26	0.957957444	0.870760636	1.054157404	0.37155457
iPSC-CVPC	Arteria	donor	G	27	0.86321201	0.786085628	0.948133649	0.001939493
iPSC-CVPC	Arteria	donor	G	28	0.844171395	0.768064948	0.928035327	0.000396618
iPSC-CVPC	Arteria	donor	G	29	0.953465534	0.866977497	1.048870619	0.32358658
iPSC-CVPC	Arteria	donor	G	30	0.890834121	0.80870839	0.981556902	0.01822323
iPSC-CVPC	Arteria	donor	G	31	0.968620186	0.880490519	1.065955774	0.514554454
iPSC-CVPC	Arteria	donor	G	32	0.956007799	0.867136177	1.054333216	0.360698779
iPSC-CVPC	Arteria	donor	G	33	0.920844165	0.836757817	1.013701838	0.08888433
iPSC-CVPC	Arteria	donor	G	34	0.937752454	0.852196315	1.032204255	0.190249395
iPSC-CVPC	Arteria	donor	G	35	0.955682518	0.868105183	1.052350814	0.355282283
iPSC-CVPC	Arteria	donor	G	36	0.91250334	0.829472032	1.004123277	0.058802915
iPSC-CVPC	Arteria	donor	G	37	0.877521427	0.79821774	0.964910411	0.006468892
iPSC-CVPC	Arteria	donor	G	38	0.945134516	0.85887144	1.040397184	0.244446639
iPSC-CVPC	Arteria	donor	G	39	0.955222086	0.868175182	1.051228546	0.345612488
iPSC-CVPC	Arteria	donor	G	40	0.946635569	0.860369989	1.041886403	0.255279219
iPSC-CVPC	Arteria	donor	G	41	0.906521636	0.824756144	0.996635569	0.041245734
iPSC-CVPC	Arteria	donor	G	42	1.021956093	0.927729908	1.126144334	0.660851022
iPSC-CVPC	Arteria	donor	G	43	0.966861548	0.878999292	1.063866997	0.484473781
iPSC-CVPC	Arteria	donor	G	44	0.895870159	0.815061195	0.984961096	0.022428292
iPSC-CVPC	Arteria	donor	G	45	0.914436648	0.831423933	1.006024942	0.062826207
iPSC-CVPC	Arteria	donor	G	46	0.959025208	0.870444697	1.056951509	0.390732337
iPSC-CVPC	Arteria	donor	G	47	0.867363837	0.788323378	0.954577577	0.003484339
iPSC-CVPC	Arteria	donor	G	48	0.963357175	0.87380596	1.06241469	0.458912832
iPSC-CVPC	Arteria	donor	G	49	0.89965632	0.817718534	0.990092671	0.028933513
iPSC-CVPC	Arteria	donor	G	50	0.935584313	0.850989955	1.028881081	0.170770788
iPSC-CVPC	Arteria	donor	G	51	0.934143067	0.848032581	1.029328188	0.169532393
iPSC-CVPC	Arteria	donor	G	52	0.906967466	0.823793044	0.998803388	0.045154541
iPSC-CVPC	Arteria	donor	G	53	0.816541453	0.741141672	0.899809397	3.91E-05
iPSC-CVPC	Arteria	donor	G	54	0.9529779	0.865003596	1.050235801	0.326636437
iPSC-CVPC	Arteria	donor	G	55	0.919475375	0.835532651	1.012159107	0.08442276
iPSC-CVPC	Arteria	donor	G	56	0.885453876	0.804315024	0.975034289	0.012626766
iPSC-CVPC	Arteria	donor	G	57	0.94177469	0.855082861	1.037604658	0.221032783
iPSC-CVPC	Arteria	donor	G	58	0.957138662	0.8689724	1.054537556	0.37853341
iPSC-CVPC	Arteria	donor	G	59	0.900936742	0.817871007	0.992731362	0.034444291
iPSC-CVPC	Arteria	donor	G	60	0.924143469	0.838421274	1.01897193	0.108334632
iPSC-CVPC	Arteria	donor	G	61	0.896294341	0.813383056	0.987928156	0.026347823
iPSC-CVPC	Arteria	donor	G	62	0.926907513	0.841413326	1.02140014	0.121820893
iPSC-CVPC	Arteria	donor	G	63	0.919895372	0.835257416	1.0134488	0.090840603
iPSC-CVPC	Arteria	donor	G	64	0.995768737	0.90343044	1.097971622	0.941215677
iPSC-CVPC	Arteria	donor	G	65	0.890294686	0.807262846	0.982149129	0.01922931
iPSC-CVPC	Arteria	donor	G	66	0.878978035	0.798064325	0.96839331	0.008499831
iPSC-CVPC	Arteria	donor	G	67	0.907404663	0.823692167	0.999884494	0.049153134
iPSC-CVPC	Arteria	donor	G	68	0.895150878	0.812445019	0.986608421	0.024798932
iPSC-CVPC	Arteria	donor	G	69	0.839069974	0.76141795	0.924870781	0.000357219
iPSC-CVPC	Arteria	donor	G	70	0.959275198	0.870406791	1.05752936	0.402830931
iPSC-CVPC	Arteria	donor	G	71	0.9514717	0.862899315	1.049496287	0.322181965
iPSC-CVPC	Arteria	donor	G	72	0.928954812	0.842008283	1.025253913	0.141126883
iPSC-CVPC	Arteria	donor	G	73	0.922450544	0.837872432	1.015902818	0.096987346
iPSC-CVPC	Arteria	donor	G	74	0.883498906	0.801879014	0.973730755	0.011828578
iPSC-CVPC	Arteria	donor	G	75	0.865949337	0.786676378	0.953471583	0.00307455
iPSC-CVPC	Arteria	donor	G	76	0.931498804	0.845709975	1.02632577	0.148139245
iPSC-CVPC	Arteria	donor	G	77	0.970702467	0.881223811	1.069685111	0.556995182
iPSC-CVPC	Arteria	donor	G	78	0.843543442	0.765869718	0.929356348	0.000508362
iPSC-CVPC	Arteria	donor	G	79	0.908986505	0.825158373	1.001636343	0.052142399
iPSC-CVPC	Arteria	donor	G	80	0.958217973	0.868743891	1.057230513	0.398893323
iPSC-CVPC	Arteria	donor	G	81	0.919683734	0.834142253	1.0143459	0.091855023
iPSC-CVPC	Arteria	donor	G	82	0.932070169	0.845656384	1.027661237	0.152320033
iPSC-CVPC	Arteria	donor	G	83	0.872422921	0.792174763	0.961058578	0.005479029
iPSC-CVPC	Arteria	donor	G	84	0.975945506	0.884859195	1.076844849	0.63769119
iPSC-CVPC	Arteria	donor	G	85	0.954411429	0.865826859	1.052374337	0.348607415
iPSC-CVPC	Arteria	donor	G	86	0.945142924	0.857601628	1.041959901	0.257267084
iPSC-CVPC	Arteria	donor	G	87	0.900936742	0.817871007	0.992731362	0.034444291
iPSC-CVPC	Arteria	donor	G	88	0.953474784	0.865094855	1.051175912	0.336775948
iPSC-CVPC	Arteria	donor	G	89	0.967276316	0.877030845	1.067212168	0.503489128
iPSC-CVPC	Arteria	donor	G	90	1.000643378	0.907149756	1.104189279	1
iPSC-CVPC	Arteria	donor	G	91	0.964025609	0.874776826	1.062836502	0.46062887
iPSC-CVPC	Arteria	donor	G	92	0.954520479	0.865790671	1.052663232	0.347870009
iPSC-CVPC	Arteria	donor	G	93	0.972014379	0.88077144	1.073170072	0.583244807
iPSC-CVPC	Arteria	donor	G	94	0.919898626	0.834886409	1.013909373	0.089383274
iPSC-CVPC	Arteria	donor	G	95	0.903245731	0.819844415	0.995391403	0.03865197
iPSC-CVPC	Arteria	donor	G	96	0.947475201	0.858969903	1.045462913	0.285290035
iPSC-CVPC	Arteria	donor	G	97	0.882946278	0.801584069	0.972833898	0.011266194
iPSC-CVPC	Arteria	donor	G	98	0.973203981	0.883001447	1.073056833	0.588293093
iPSC-CVPC	Arteria	donor	G	99	0.907151487	0.822713605	1.000565965	0.049837972
iPSC-CVPC	Arteria	donor	G	100	1.015231942	0.919233971	1.121698651	0.782961162
iPSC-CVPC	Arteria	donor	T	1	0.611564941	0.514134155	0.727848433	1.95E-08
iPSC-CVPC	Arteria	donor	T	2	1.150603633	1.058421435	1.250877606	0.000931921
iPSC-CVPC	Arteria	donor	T	3	1.099214764	1.010280174	1.196063608	0.027053642
iPSC-CVPC	Arteria	donor	T	4	0.786836584	0.691560955	0.895734305	0.000258465
iPSC-CVPC	Arteria	donor	T	5	0.927339505	0.820088639	1.04939669	0.223807805
iPSC-CVPC	Arteria	donor	T	6	1.00317487	0.916623043	1.098146136	0.963660795
iPSC-CVPC	Arteria	donor	T	7	1.086736545	0.9942935	1.188112977	0.066695624
iPSC-CVPC	Arteria	donor	T	8	1.056818652	0.961859606	1.161473814	0.246182692
iPSC-CVPC	Arteria	donor	T	9	1.084753163	0.988967997	1.190097235	0.081735047
iPSC-CVPC	Arteria	donor	T	10	0.990003152	0.903556018	1.085019644	0.835393576
iPSC-CVPC	Arteria	donor	T	11	1.099720942	1.002594203	1.206733328	0.043373112
iPSC-CVPC	Arteria	donor	T	12	1.057388708	0.96411431	1.159971093	0.236238641
iPSC-CVPC	Arteria	donor	T	13	1.085730598	0.990406119	1.190490953	0.07946487
iPSC-CVPC	Arteria	donor	T	14	1.054179343	0.962900447	1.154373238	0.25420472
iPSC-CVPC	Arteria	donor	T	15	1.083970261	0.989467877	1.187775565	0.081548473
iPSC-CVPC	Arteria	donor	T	16	1.14538607	1.045816455	1.254775129	0.003294659
iPSC-CVPC	Arteria	donor	T	17	1.091081452	0.996268573	1.195299798	0.05797908
iPSC-CVPC	Arteria	donor	T	18	1.110760047	1.0139452	1.217246438	0.023465006
iPSC-CVPC	Arteria	donor	T	19	1	0.913307077	1.095210869	1
iPSC-CVPC	Arteria	donor	T	20	1.009087044	0.922432222	1.104105486	0.856139775
iPSC-CVPC	Arteria	donor	T	21	1.051158473	0.960465987	1.150727809	0.275447062
iPSC-CVPC	Arteria	donor	T	22	1.106708862	1.010979291	1.211860921	0.027557118
iPSC-CVPC	Arteria	donor	T	23	1.122379001	1.024041701	1.230471434	0.013060617
iPSC-CVPC	Arteria	donor	T	24	1.085056546	0.988818487	1.190951	0.084418725
iPSC-CVPC	Arteria	donor	T	25	1.180960719	1.076389579	1.296114035	0.00039554
iPSC-CVPC	Arteria	donor	T	26	1.112405078	1.014589235	1.220085477	0.022280032
iPSC-CVPC	Arteria	donor	T	27	1.132926566	1.032508294	1.243550081	0.008050432
iPSC-CVPC	Arteria	donor	T	28	1.206719875	1.098660197	1.325904095	7.07E-05
iPSC-CVPC	Arteria	donor	T	29	1.080568894	0.984845781	1.185878789	0.102929154
iPSC-CVPC	Arteria	donor	T	30	1.094899569	0.999721717	1.199513534	0.049438412
iPSC-CVPC	Arteria	donor	T	31	1.092630723	0.99721401	1.197578596	0.056699344
iPSC-CVPC	Arteria	donor	T	32	1.09713554	1.00122717	1.202611036	0.045661935
iPSC-CVPC	Arteria	donor	T	33	1.095083406	0.998129661	1.201874756	0.05339603
iPSC-CVPC	Arteria	donor	T	34	1.078499183	0.983315753	1.183162601	0.109240129
iPSC-CVPC	Arteria	donor	T	35	1.015115837	0.925756138	1.113389751	0.762516291
iPSC-CVPC	Arteria	donor	T	36	1.080403749	0.985142647	1.185145417	0.099739658
iPSC-CVPC	Arteria	donor	T	37	1.153229651	1.050443482	1.266509604	0.002596985
iPSC-CVPC	Arteria	donor	T	38	1.107731037	1.01010922	1.215217276	0.029554101
iPSC-CVPC	Arteria	donor	T	39	1.130368519	1.030927606	1.239750381	0.008535266
iPSC-CVPC	Arteria	donor	T	40	1.083316266	0.987181324	1.189090684	0.088591605
iPSC-CVPC	Arteria	donor	T	41	1.113465027	1.015330954	1.221466473	0.021973087
iPSC-CVPC	Arteria	donor	T	42	1.037269914	0.945994808	1.137640484	0.443837759
iPSC-CVPC	Arteria	donor	T	43	1.033719617	0.943017967	1.133470554	0.487426237
iPSC-CVPC	Arteria	donor	T	44	1.069770482	0.974658127	1.17447865	0.15348614
iPSC-CVPC	Arteria	donor	T	45	1.049951077	0.95642946	1.152943564	0.312682505
iPSC-CVPC	Arteria	donor	T	46	1.049390479	0.958102432	1.149668239	0.302461978
iPSC-CVPC	Arteria	donor	T	47	1.102665326	1.005714126	1.209351865	0.035566017
iPSC-CVPC	Arteria	donor	T	48	1.03380663	0.942938533	1.133754181	0.486672798
iPSC-CVPC	Arteria	donor	T	49	1.110471767	1.011717222	1.219300604	0.026526829
iPSC-CVPC	Arteria	donor	T	50	1.260079332	1.147537673	1.384259517	9.36E-07
iPSC-CVPC	Arteria	donor	T	51	1.227710911	1.118057011	1.348656864	1.33E-05
iPSC-CVPC	Arteria	donor	T	52	1.089203092	0.992723974	1.195505425	0.069189724
iPSC-CVPC	Arteria	donor	T	53	1.178953461	1.075659139	1.29251162	0.000383972
iPSC-CVPC	Arteria	donor	T	54	1.06612245	0.97212891	1.169497584	0.171014615
iPSC-CVPC	Arteria	donor	T	55	1.088116371	0.992099483	1.193717436	0.070450497
iPSC-CVPC	Arteria	donor	T	56	1.031671582	0.940270547	1.132232022	0.512948004
iPSC-CVPC	Arteria	donor	T	57	1.249086094	1.137019085	1.372744349	2.66E-06
iPSC-CVPC	Arteria	donor	T	58	1.088012192	0.991392145	1.19430985	0.076092186
iPSC-CVPC	Arteria	donor	T	59	1.109098824	1.011590774	1.216467669	0.026604336
iPSC-CVPC	Arteria	donor	T	60	1.146962568	1.045108001	1.259174796	0.00362864
iPSC-CVPC	Arteria	donor	T	61	1.102638695	1.005094325	1.210070712	0.03855006
iPSC-CVPC	Arteria	donor	T	62	1.070281752	0.975751038	1.174267391	0.149583496
iPSC-CVPC	Arteria	donor	T	63	1.091925494	0.995839308	1.197701858	0.060897408
iPSC-CVPC	Arteria	donor	T	64	1.086708287	0.990327493	1.19274687	0.076476047
iPSC-CVPC	Arteria	donor	T	65	1.03528088	0.944422726	1.135163893	0.459035969
iPSC-CVPC	Arteria	donor	T	66	1.088746023	0.992952707	1.194207853	0.067593878
iPSC-CVPC	Arteria	donor	T	67	1.109627597	1.010990165	1.218370467	0.028134523
iPSC-CVPC	Arteria	donor	T	68	1.048748014	0.956640487	1.150041227	0.308622668
iPSC-CVPC	Arteria	donor	T	69	1.119467989	1.02123082	1.227535532	0.015600857
iPSC-CVPC	Arteria	donor	T	70	1.117012072	1.01867838	1.225246128	0.017326499
iPSC-CVPC	Arteria	donor	T	71	1.110216314	1.012089625	1.218313001	0.025830544
iPSC-CVPC	Arteria	donor	T	72	1.104666874	1.006777988	1.212511738	0.03413054
iPSC-CVPC	Arteria	donor	T	73	1.147527853	1.046417188	1.258819992	0.00312874
iPSC-CVPC	Arteria	donor	T	74	1.081524612	0.986736837	1.185675411	0.092581042
iPSC-CVPC	Arteria	donor	T	75	1.117816466	1.019068729	1.226546297	0.018013216
iPSC-CVPC	Arteria	donor	T	76	1.11368257	1.015918819	1.221209744	0.021192485
iPSC-CVPC	Arteria	donor	T	77	1.027448659	0.936718289	1.127268186	0.575969815
iPSC-CVPC	Arteria	donor	T	78	1.073672368	0.978638259	1.178195634	0.130250853
iPSC-CVPC	Arteria	donor	T	79	1.126922022	1.027361376	1.236504586	0.010789194
iPSC-CVPC	Arteria	donor	T	80	1.08521464	0.989300204	1.190737503	0.081357813
iPSC-CVPC	Arteria	donor	T	81	1.158100499	1.055262868	1.271370822	0.001833324
iPSC-CVPC	Arteria	donor	T	82	1.135741091	1.035625852	1.245944072	0.006390294
iPSC-CVPC	Arteria	donor	T	83	1.094752276	0.998814848	1.200309975	0.052966431
iPSC-CVPC	Arteria	donor	T	84	1.078803526	0.983922269	1.183089871	0.10545458
iPSC-CVPC	Arteria	donor	T	85	1.126583298	1.026510267	1.236799539	0.011092778
iPSC-CVPC	Arteria	donor	T	86	1.003072708	0.91504793	1.09984519	0.963012576
iPSC-CVPC	Arteria	donor	T	87	1.106261833	1.008211013	1.214245291	0.032175734
iPSC-CVPC	Arteria	donor	T	88	1.016391077	0.927779227	1.113727631	0.730027334
iPSC-CVPC	Arteria	donor	T	89	1.075057296	0.980094361	1.179494359	0.125141624
iPSC-CVPC	Arteria	donor	T	90	1.034636868	0.943185175	1.135299113	0.469752834
iPSC-CVPC	Arteria	donor	T	91	1.042805202	0.95067976	1.144132647	0.376302726
iPSC-CVPC	Arteria	donor	T	92	1.152138466	1.049857001	1.264813386	0.002507011
iPSC-CVPC	Arteria	donor	T	93	1.092624054	0.996171051	1.198841637	0.060080249
iPSC-CVPC	Arteria	donor	T	94	1.083935246	0.988212682	1.189206106	0.085818121
iPSC-CVPC	Arteria	donor	T	95	1.123885923	1.025067203	1.232631561	0.011931315
iPSC-CVPC	Arteria	donor	T	96	1.128162004	1.028673752	1.237637876	0.010233937
iPSC-CVPC	Arteria	donor	T	97	1.154005103	1.051089781	1.267432812	0.002394201
iPSC-CVPC	Arteria	donor	T	98	1.095334214	0.998451313	1.202041005	0.05360209
iPSC-CVPC	Arteria	donor	T	99	1.101519971	1.004552851	1.208306614	0.039514742
iPSC-CVPC	Arteria	donor	T	100	1.195818089	1.089920544	1.312464346	0.00013463
iPSC-CVPC	Heart	donor	A	1	0.713308816	0.608922812	0.836529838	2.54E-05
iPSC-CVPC	Heart	donor	A	2	0.418590153	0.333993795	0.524264079	9.24E-15
iPSC-CVPC	Heart	donor	A	3	1.059414168	0.96208576	1.16689645	0.244810007
iPSC-CVPC	Heart	donor	A	4	1.327639192	1.210240667	1.456453818	1.47E-09
iPSC-CVPC	Heart	donor	A	5	1.267135497	1.151146402	1.395270477	9.59E-07
iPSC-CVPC	Heart	donor	A	6	0.916502033	0.811756223	1.03557117	0.155665536
iPSC-CVPC	Heart	donor	A	7	1.015857332	0.913330973	1.130479642	0.788671656
iPSC-CVPC	Heart	donor	A	8	1.201700976	1.082871223	1.334298159	0.000480988
iPSC-CVPC	Heart	donor	A	9	1.046487672	0.939542245	1.166250438	0.41655299
iPSC-CVPC	Heart	donor	A	10	1.1602767	1.040971522	1.294125455	0.006955283
iPSC-CVPC	Heart	donor	A	11	0.988703491	0.888003395	1.101432355	0.849392283
iPSC-CVPC	Heart	donor	A	12	1.084930563	0.97476118	1.208198743	0.133339896
iPSC-CVPC	Heart	donor	A	13	1.043026705	0.935449888	1.163688359	0.460244052
iPSC-CVPC	Heart	donor	A	14	1.09523505	0.981150527	1.223298469	0.104820096
iPSC-CVPC	Heart	donor	A	15	1.028011594	0.920923189	1.148213407	0.638020797
iPSC-CVPC	Heart	donor	A	16	1.000173624	0.898454261	1.114047928	1
iPSC-CVPC	Heart	donor	A	17	0.962058624	0.864186793	1.071500726	0.480336923
iPSC-CVPC	Heart	donor	A	18	1.120427782	1.004205688	1.250983478	0.040425396
iPSC-CVPC	Heart	donor	A	19	0.983290624	0.882386894	1.096357361	0.763476015
iPSC-CVPC	Heart	donor	A	20	1.029926379	0.924950432	1.147402983	0.607369164
iPSC-CVPC	Heart	donor	A	21	1.118308109	1.002609542	1.24811443	0.043795017
iPSC-CVPC	Heart	donor	A	22	1.002881693	0.900008828	1.118111627	0.978228426
iPSC-CVPC	Heart	donor	A	23	1.056836693	0.948753599	1.177891487	0.316483737
iPSC-CVPC	Heart	donor	A	24	1.091599059	0.980944882	1.21535152	0.108626142
iPSC-CVPC	Heart	donor	A	25	1.00350163	0.902051327	1.116915291	0.95714304
iPSC-CVPC	Heart	donor	A	26	1.00800731	0.905440095	1.122775032	0.892442102
iPSC-CVPC	Heart	donor	A	27	1.069698666	0.960060601	1.192549287	0.222608359
iPSC-CVPC	Heart	donor	A	28	1.069859948	0.959151731	1.194070687	0.228408694
iPSC-CVPC	Heart	donor	A	29	1.036344804	0.931083612	1.154143479	0.518138764
iPSC-CVPC	Heart	donor	A	30	1.042682485	0.936576802	1.161452643	0.450190138
iPSC-CVPC	Heart	donor	A	31	1.067777799	0.957248657	1.191772179	0.239044678
iPSC-CVPC	Heart	donor	A	32	1.019717149	0.916022846	1.13573979	0.725585451
iPSC-CVPC	Heart	donor	A	33	1.039687491	0.934488267	1.157300964	0.485645033
iPSC-CVPC	Heart	donor	A	34	1.022565672	0.920850889	1.136043395	0.692246908
iPSC-CVPC	Heart	donor	A	35	1.067400089	0.960875167	1.186335198	0.225115177
iPSC-CVPC	Heart	donor	A	36	1.05948881	0.953820637	1.177462327	0.279542143
iPSC-CVPC	Heart	donor	A	37	1.030535944	0.925771064	1.147735451	0.589647056
iPSC-CVPC	Heart	donor	A	38	1.000946524	0.901494223	1.111896079	1
iPSC-CVPC	Heart	donor	A	39	1.077020411	0.968805676	1.197933265	0.167706628
iPSC-CVPC	Heart	donor	A	40	1.066863033	0.959746148	1.186558982	0.23239378
iPSC-CVPC	Heart	donor	A	41	1.052505658	0.9455237	1.172213163	0.346399575
iPSC-CVPC	Heart	donor	A	42	0.975551193	0.87814242	1.084275946	0.651168513
iPSC-CVPC	Heart	donor	A	43	1.073904845	0.965616472	1.19496796	0.191759885
iPSC-CVPC	Heart	donor	A	44	1.12443282	1.012285869	1.249787344	0.027503915
iPSC-CVPC	Heart	donor	A	45	1.0645694	0.956891035	1.185008813	0.250138269
iPSC-CVPC	Heart	donor	A	46	1.033511352	0.929716494	1.149455079	0.540518987
iPSC-CVPC	Heart	donor	A	47	0.994142778	0.893386239	1.10686747	0.914095231
iPSC-CVPC	Heart	donor	A	48	1.012282549	0.911548526	1.124690668	0.832619449
iPSC-CVPC	Heart	donor	A	49	1.073140685	0.965689414	1.193157631	0.186147164
iPSC-CVPC	Heart	donor	A	50	1.095360252	0.984467427	1.219314999	0.092629458
iPSC-CVPC	Heart	donor	A	51	0.970876074	0.874342603	1.078619653	0.578040522
iPSC-CVPC	Heart	donor	A	52	1.060339384	0.953698224	1.179525055	0.275480772
iPSC-CVPC	Heart	donor	A	53	1.096803523	0.986006635	1.220662963	0.088252726
iPSC-CVPC	Heart	donor	A	54	1.010379822	0.909866693	1.12253737	0.853330837
iPSC-CVPC	Heart	donor	A	55	0.982486389	0.88514662	1.091062864	0.751693841
iPSC-CVPC	Heart	donor	A	56	1.109881528	0.997519254	1.235500202	0.054894061
iPSC-CVPC	Heart	donor	A	57	1.030213498	0.927035033	1.14544123	0.595344169
iPSC-CVPC	Heart	donor	A	58	1.041935706	0.936928671	1.159305539	0.454733292
iPSC-CVPC	Heart	donor	A	59	1.04749213	0.942113175	1.165205548	0.394075343
iPSC-CVPC	Heart	donor	A	60	0.978865116	0.881895822	1.087027166	0.692443216
iPSC-CVPC	Heart	donor	A	61	1.017511147	0.916564373	1.130106286	0.752127172
iPSC-CVPC	Heart	donor	A	62	1.079380709	0.971609865	1.199700343	0.154626766
iPSC-CVPC	Heart	donor	A	63	1.115140715	1.003949739	1.239375376	0.040588764
iPSC-CVPC	Heart	donor	A	64	1.007701149	0.90732436	1.119700087	0.894795683
iPSC-CVPC	Heart	donor	A	65	1.063404947	0.95686363	1.182425945	0.254722046
iPSC-CVPC	Heart	donor	A	66	1.063022103	0.955311826	1.1835691	0.260282315
iPSC-CVPC	Heart	donor	A	67	1.090723451	0.981272318	1.212964516	0.106463025
iPSC-CVPC	Heart	donor	A	68	1.106693178	0.996437664	1.229744399	0.055510514
iPSC-CVPC	Heart	donor	A	69	1.03664326	0.934161154	1.150910004	0.496155046
iPSC-CVPC	Heart	donor	A	70	1.024622746	0.922542904	1.138525101	0.653449722
iPSC-CVPC	Heart	donor	A	71	1.124643599	1.013327877	1.248918635	0.026871022
iPSC-CVPC	Heart	donor	A	72	1.113987004	1.003601783	1.237220273	0.04184517
iPSC-CVPC	Heart	donor	A	73	1.031164027	0.927899336	1.146479663	0.577159483
iPSC-CVPC	Heart	donor	A	74	1.048976687	0.943721293	1.16654996	0.380719408
iPSC-CVPC	Heart	donor	A	75	1.058528648	0.952941948	1.17640552	0.291293136
iPSC-CVPC	Heart	donor	A	76	1.069753607	0.963252311	1.188623054	0.206850059
iPSC-CVPC	Heart	donor	A	77	1.048371265	0.94296882	1.166126946	0.379861486
iPSC-CVPC	Heart	donor	A	78	1.175654564	1.057811387	1.307362522	0.002322329
iPSC-CVPC	Heart	donor	A	79	0.947779096	0.85394929	1.052375843	0.315478764
iPSC-CVPC	Heart	donor	A	80	0.973493768	0.876999111	1.081186007	0.615884039
iPSC-CVPC	Heart	donor	A	81	1.069910114	0.962456385	1.189982121	0.212287929
iPSC-CVPC	Heart	donor	A	82	1.021246513	0.919227808	1.135150609	0.710584655
iPSC-CVPC	Heart	donor	A	83	1.14812316	1.033624137	1.276015735	0.009516159
iPSC-CVPC	Heart	donor	A	84	1.075880772	0.9686706	1.195520335	0.171276062
iPSC-CVPC	Heart	donor	A	85	1.020854833	0.919866688	1.133449511	0.713381842
iPSC-CVPC	Heart	donor	A	86	1.129449147	1.015305926	1.257261909	0.023802397
iPSC-CVPC	Heart	donor	A	87	1.026364604	0.924231127	1.140287709	0.634886715
iPSC-CVPC	Heart	donor	A	88	1.156805989	1.040238514	1.28721613	0.006460595
iPSC-CVPC	Heart	donor	A	89	0.994232783	0.895809517	1.104008516	0.916180035
iPSC-CVPC	Heart	donor	A	90	1.031625012	0.930403418	1.144340342	0.567544207
iPSC-CVPC	Heart	donor	A	91	1.061765846	0.956149638	1.179605062	0.258315905
iPSC-CVPC	Heart	donor	A	92	1.100542984	0.989507213	1.224660385	0.074841088
iPSC-CVPC	Heart	donor	A	93	1.090195925	0.981752354	1.211152541	0.103940809
iPSC-CVPC	Heart	donor	A	94	1.111474076	1.00053792	1.235450145	0.048599744
iPSC-CVPC	Heart	donor	A	95	1.079982873	0.971906802	1.200677521	0.153669124
iPSC-CVPC	Heart	donor	A	96	1.109087228	0.997776666	1.233364163	0.053701898
iPSC-CVPC	Heart	donor	A	97	1.03053378	0.928993107	1.143732104	0.583408876
iPSC-CVPC	Heart	donor	A	98	1.05296258	0.947804138	1.170398049	0.341337388
iPSC-CVPC	Heart	donor	A	99	0.977571157	0.881578311	1.08448767	0.675892237
iPSC-CVPC	Heart	donor	A	100	1.018909042	0.918867397	1.13034287	0.735016314
iPSC-CVPC	Heart	donor	C	1	0.683546254	0.542366489	0.863437898	0.001110873
iPSC-CVPC	Heart	donor	C	2	0.431949168	0.340559583	0.54749676	1.42E-12
iPSC-CVPC	Heart	donor	C	3	0.467504705	0.376315244	0.580775115	2.74E-12
iPSC-CVPC	Heart	donor	C	4	0.693184536	0.582488451	0.826021686	3.42E-05
iPSC-CVPC	Heart	donor	C	5	0.661025049	0.565128516	0.773891339	2.14E-07
iPSC-CVPC	Heart	donor	C	6	0.7702814	0.669642274	0.886790957	0.000249652
iPSC-CVPC	Heart	donor	C	7	0.883651117	0.78337781	0.997433132	0.042483101
iPSC-CVPC	Heart	donor	C	8	0.870312362	0.779731658	0.971919865	0.012501376
iPSC-CVPC	Heart	donor	C	9	0.907227388	0.815808167	1.009330702	0.070358057
iPSC-CVPC	Heart	donor	C	10	0.925910851	0.831584418	1.031404419	0.156168971
iPSC-CVPC	Heart	donor	C	11	0.865114208	0.777136915	0.963471146	0.007901256
iPSC-CVPC	Heart	donor	C	12	0.908959416	0.815804371	1.013214963	0.083173019
iPSC-CVPC	Heart	donor	C	13	0.871701213	0.783763304	0.969939068	0.010762167
iPSC-CVPC	Heart	donor	C	14	0.931396127	0.836527899	1.037523883	0.190765212
iPSC-CVPC	Heart	donor	C	15	0.933517432	0.837387457	1.041210094	0.214635794
iPSC-CVPC	Heart	donor	C	16	0.944868638	0.847647647	1.053789258	0.30838514
iPSC-CVPC	Heart	donor	C	17	0.925931639	0.830486795	1.032901385	0.167057024
iPSC-CVPC	Heart	donor	C	18	0.863945202	0.775947903	0.962344287	0.007187472
iPSC-CVPC	Heart	donor	C	19	0.930217134	0.835085972	1.036703192	0.188697121
iPSC-CVPC	Heart	donor	C	20	0.932243972	0.835733115	1.040447759	0.211928854
iPSC-CVPC	Heart	donor	C	21	0.928314687	0.830750963	1.037940225	0.18508235
iPSC-CVPC	Heart	donor	C	22	0.899653972	0.805275309	1.005624584	0.058718223
iPSC-CVPC	Heart	donor	C	23	0.944030083	0.84472801	1.055583904	0.310368997
iPSC-CVPC	Heart	donor	C	24	0.913831288	0.817847476	1.021639118	0.107794896
iPSC-CVPC	Heart	donor	C	25	0.831926304	0.746647523	0.927312947	0.000803872
iPSC-CVPC	Heart	donor	C	26	0.92339987	0.827415912	1.031073615	0.154997864
iPSC-CVPC	Heart	donor	C	27	0.925408379	0.828165689	1.034656793	0.167075917
iPSC-CVPC	Heart	donor	C	28	0.890573817	0.799088153	0.993037638	0.035802788
iPSC-CVPC	Heart	donor	C	29	0.898667757	0.806310174	1.00207244	0.053318407
iPSC-CVPC	Heart	donor	C	30	0.930895805	0.833942357	1.039688381	0.199058035
iPSC-CVPC	Heart	donor	C	31	0.927752887	0.830789772	1.036624974	0.178463549
iPSC-CVPC	Heart	donor	C	32	0.943297916	0.844678086	1.054037801	0.300238328
iPSC-CVPC	Heart	donor	C	33	0.920374388	0.825518827	1.026634312	0.135627918
iPSC-CVPC	Heart	donor	C	34	0.873718765	0.782674585	0.975869133	0.015679051
iPSC-CVPC	Heart	donor	C	35	0.898127267	0.804817356	1.002785983	0.053928038
iPSC-CVPC	Heart	donor	C	36	0.995159198	0.889805501	1.113713845	0.932505113
iPSC-CVPC	Heart	donor	C	37	0.952330277	0.853628535	1.063010086	0.375165967
iPSC-CVPC	Heart	donor	C	38	0.989282127	0.883755142	1.108184255	0.864287868
iPSC-CVPC	Heart	donor	C	39	0.847806358	0.759493976	0.946832379	0.003123613
iPSC-CVPC	Heart	donor	C	40	0.802524218	0.719068305	0.896059339	7.82E-05
iPSC-CVPC	Heart	donor	C	41	0.900835008	0.806512886	1.006711608	0.063061396
iPSC-CVPC	Heart	donor	C	42	0.896617191	0.803693828	1.000789144	0.051109239
iPSC-CVPC	Heart	donor	C	43	0.927373477	0.829949591	1.036830045	0.185148657
iPSC-CVPC	Heart	donor	C	44	0.999653255	0.893424991	1.119239043	1
iPSC-CVPC	Heart	donor	C	45	0.99691631	0.891888811	1.115025964	0.95521319
iPSC-CVPC	Heart	donor	C	46	0.941853027	0.842356892	1.053733484	0.294818781
iPSC-CVPC	Heart	donor	C	47	0.976103825	0.873844558	1.091017518	0.674692736
iPSC-CVPC	Heart	donor	C	48	0.972932217	0.871675353	1.086647111	0.636470694
iPSC-CVPC	Heart	donor	C	49	0.875722583	0.784967141	0.977403795	0.016415239
iPSC-CVPC	Heart	donor	C	50	0.813480558	0.729353701	0.907696331	0.000194637
iPSC-CVPC	Heart	donor	C	51	0.850811236	0.763008713	0.949139825	0.003447963
iPSC-CVPC	Heart	donor	C	52	0.920575691	0.824907987	1.027882537	0.139442287
iPSC-CVPC	Heart	donor	C	53	0.906756799	0.811202859	1.014086981	0.083941605
iPSC-CVPC	Heart	donor	C	54	0.908311444	0.813888964	1.01420703	0.083464354
iPSC-CVPC	Heart	donor	C	55	0.96205233	0.860904919	1.075675755	0.499888158
iPSC-CVPC	Heart	donor	C	56	0.926275698	0.83002942	1.034252	0.172085602
iPSC-CVPC	Heart	donor	C	57	0.890497805	0.798970029	0.993011829	0.035699758
iPSC-CVPC	Heart	donor	C	58	0.859712513	0.77180381	0.958059492	0.005849658
iPSC-CVPC	Heart	donor	C	59	0.833675699	0.747664658	0.929963853	0.001000187
iPSC-CVPC	Heart	donor	C	60	0.948146664	0.848864681	1.059660213	0.340554517
iPSC-CVPC	Heart	donor	C	61	0.919595352	0.821935178	1.029443213	0.145553659
iPSC-CVPC	Heart	donor	C	62	0.911330913	0.816786492	1.017356966	0.094668577
iPSC-CVPC	Heart	donor	C	63	0.887982313	0.795171176	0.992137137	0.034791371
iPSC-CVPC	Heart	donor	C	64	0.89350897	0.800712677	0.997604298	0.044200013
iPSC-CVPC	Heart	donor	C	65	0.893196102	0.800221329	0.997512832	0.043702277
iPSC-CVPC	Heart	donor	C	66	0.914332472	0.819673385	1.020448309	0.10698657
iPSC-CVPC	Heart	donor	C	67	0.897244247	0.805329935	1.000154701	0.047563505
iPSC-CVPC	Heart	donor	C	68	0.870049208	0.778493449	0.972904523	0.013473875
iPSC-CVPC	Heart	donor	C	69	0.962071815	0.861721623	1.074682945	0.485952725
iPSC-CVPC	Heart	donor	C	70	1.026870616	0.91916224	1.147889379	0.655566358
iPSC-CVPC	Heart	donor	C	71	0.866334701	0.776395237	0.967159546	0.010001301
iPSC-CVPC	Heart	donor	C	72	0.851017148	0.76394919	0.948416146	0.003153974
iPSC-CVPC	Heart	donor	C	73	0.913729154	0.818549518	1.020497072	0.10479249
iPSC-CVPC	Heart	donor	C	74	0.890724923	0.799322998	0.993088691	0.036009054
iPSC-CVPC	Heart	donor	C	75	0.92992909	0.833054622	1.038621427	0.198891378
iPSC-CVPC	Heart	donor	C	76	0.874946919	0.783875641	0.977038545	0.017139879
iPSC-CVPC	Heart	donor	C	77	0.903099972	0.809543469	1.008001204	0.066157854
iPSC-CVPC	Heart	donor	C	78	0.868388801	0.778793501	0.968770507	0.010519898
iPSC-CVPC	Heart	donor	C	79	0.989838286	0.887091876	1.105186276	0.868094817
iPSC-CVPC	Heart	donor	C	80	0.935578286	0.837906353	1.045174568	0.239965079
iPSC-CVPC	Heart	donor	C	81	0.803362704	0.721762047	0.894517871	5.95E-05
iPSC-CVPC	Heart	donor	C	82	0.890150139	0.796137747	0.995795632	0.04049795
iPSC-CVPC	Heart	donor	C	83	0.930629472	0.831944874	1.04167157	0.210328922
iPSC-CVPC	Heart	donor	C	84	0.872367521	0.781692533	0.97406611	0.014754714
iPSC-CVPC	Heart	donor	C	85	0.861863074	0.77238988	0.962161445	0.007789456
iPSC-CVPC	Heart	donor	C	86	0.927875783	0.831064634	1.036556362	0.179217762
iPSC-CVPC	Heart	donor	C	87	0.950375181	0.851805672	1.06095514	0.359884589
iPSC-CVPC	Heart	donor	C	88	0.90504062	0.811310571	1.010061067	0.070691984
iPSC-CVPC	Heart	donor	C	89	0.870212424	0.780025406	0.971320158	0.01288167
iPSC-CVPC	Heart	donor	C	90	0.950476509	0.848666064	1.0651524	0.373515025
iPSC-CVPC	Heart	donor	C	91	0.92602402	0.829483203	1.034374397	0.170591041
iPSC-CVPC	Heart	donor	C	92	0.845197033	0.757821522	0.94307345	0.002342058
iPSC-CVPC	Heart	donor	C	93	0.902947449	0.809995176	1.007090146	0.063921133
iPSC-CVPC	Heart	donor	C	94	0.855952366	0.768648488	0.953585924	0.004254566
iPSC-CVPC	Heart	donor	C	95	0.836809276	0.750392306	0.933590911	0.00132646
iPSC-CVPC	Heart	donor	C	96	0.801596152	0.719918378	0.892838815	4.99E-05
iPSC-CVPC	Heart	donor	C	97	0.88465119	0.792407079	0.988145981	0.028508798
iPSC-CVPC	Heart	donor	C	98	0.922396223	0.826465645	1.03002479	0.146802939
iPSC-CVPC	Heart	donor	C	99	0.970096729	0.868057346	1.084821548	0.593232556
iPSC-CVPC	Heart	donor	C	100	0.839862203	0.753295433	0.936791604	0.001649665
iPSC-CVPC	Heart	donor	G	1	1.574306225	1.405215605	1.763160087	3.31E-15
iPSC-CVPC	Heart	donor	G	2	1.226836083	1.118448549	1.345973358	1.18E-05
iPSC-CVPC	Heart	donor	G	3	0.87871998	0.778715141	0.992246482	0.035871511
iPSC-CVPC	Heart	donor	G	4	0.924355453	0.825951797	1.035090234	0.169867866
iPSC-CVPC	Heart	donor	G	5	0.967193946	0.882451282	1.060240784	0.472937353
iPSC-CVPC	Heart	donor	G	6	1.16034731	1.057931558	1.272915279	0.001475044
iPSC-CVPC	Heart	donor	G	7	0.911820621	0.820920516	1.013200773	0.082829507
iPSC-CVPC	Heart	donor	G	8	0.888023353	0.799522592	0.986768552	0.02642344
iPSC-CVPC	Heart	donor	G	9	0.962058624	0.864186793	1.071500726	0.480336923
iPSC-CVPC	Heart	donor	G	10	0.97248436	0.873211841	1.083635937	0.604928599
iPSC-CVPC	Heart	donor	G	11	0.960159448	0.86426244	1.067162395	0.455860661
iPSC-CVPC	Heart	donor	G	12	0.881431693	0.793621076	0.979362275	0.017342692
iPSC-CVPC	Heart	donor	G	13	0.947049911	0.850510314	1.055100247	0.326545494
iPSC-CVPC	Heart	donor	G	14	0.904244829	0.81141169	1.00815746	0.068933487
iPSC-CVPC	Heart	donor	G	15	0.898928791	0.808644542	0.999694326	0.046293807
iPSC-CVPC	Heart	donor	G	16	0.920277574	0.827357462	1.024108672	0.123306438
iPSC-CVPC	Heart	donor	G	17	0.925968823	0.832914188	1.029883501	0.154126714
iPSC-CVPC	Heart	donor	G	18	0.932881005	0.838783256	1.038007767	0.195498826
iPSC-CVPC	Heart	donor	G	19	0.925531996	0.831937465	1.030122185	0.151477647
iPSC-CVPC	Heart	donor	G	20	0.955290717	0.856567697	1.065920822	0.40728949
iPSC-CVPC	Heart	donor	G	21	0.941340565	0.8472745	1.046359633	0.262197387
iPSC-CVPC	Heart	donor	G	22	0.922119084	0.830155631	1.024743811	0.128254796
iPSC-CVPC	Heart	donor	G	23	0.905192239	0.815142371	1.005594868	0.06215227
iPSC-CVPC	Heart	donor	G	24	0.871173492	0.78465234	0.967631554	0.009646733
iPSC-CVPC	Heart	donor	G	25	1.021215263	0.917739834	1.13696976	0.706497084
iPSC-CVPC	Heart	donor	G	26	0.945698748	0.850885627	1.051565456	0.296417424
iPSC-CVPC	Heart	donor	G	27	0.874008106	0.788603627	0.96901164	0.010219715
iPSC-CVPC	Heart	donor	G	28	0.842703345	0.75948001	0.935383851	0.001187062
iPSC-CVPC	Heart	donor	G	29	0.935000552	0.841272708	1.03962737	0.208056707
iPSC-CVPC	Heart	donor	G	30	0.88756171	0.799332745	0.985974716	0.025063509
iPSC-CVPC	Heart	donor	G	31	0.869383773	0.783351193	0.96524512	0.007878484
iPSC-CVPC	Heart	donor	G	32	0.922185345	0.829229382	1.026044678	0.130798458
iPSC-CVPC	Heart	donor	G	33	0.858315394	0.773129052	0.95324991	0.003951945
iPSC-CVPC	Heart	donor	G	34	0.915292198	0.824107344	1.017028841	0.098211046
iPSC-CVPC	Heart	donor	G	35	0.952870675	0.857094383	1.059862518	0.375852215
iPSC-CVPC	Heart	donor	G	36	0.890350015	0.801992317	0.988833449	0.029115823
iPSC-CVPC	Heart	donor	G	37	0.871098126	0.785728777	0.966110792	0.008538498
iPSC-CVPC	Heart	donor	G	38	0.90948515	0.818279874	1.011304072	0.076230813
iPSC-CVPC	Heart	donor	G	39	0.947627344	0.853151068	1.053042272	0.311933459
iPSC-CVPC	Heart	donor	G	40	0.962001763	0.865413208	1.069845095	0.469758799
iPSC-CVPC	Heart	donor	G	41	0.901468444	0.812164966	1.000985335	0.049667376
iPSC-CVPC	Heart	donor	G	42	1.035046158	0.930108751	1.152430436	0.536441043
iPSC-CVPC	Heart	donor	G	43	0.910099052	0.820126768	1.010328157	0.076367154
iPSC-CVPC	Heart	donor	G	44	0.832304074	0.74977742	0.92423632	0.000516115
iPSC-CVPC	Heart	donor	G	45	0.881128627	0.794095287	0.978074566	0.017089926
iPSC-CVPC	Heart	donor	G	46	0.896788264	0.807025686	0.996964677	0.04138514
iPSC-CVPC	Heart	donor	G	47	0.889031284	0.80101199	0.9871052	0.025809
iPSC-CVPC	Heart	donor	G	48	0.985616897	0.885613559	1.097507632	0.786992215
iPSC-CVPC	Heart	donor	G	49	0.856025481	0.770788604	0.951054091	0.00350382
iPSC-CVPC	Heart	donor	G	50	0.918339076	0.827340016	1.019802273	0.105990225
iPSC-CVPC	Heart	donor	G	51	0.972871859	0.875540769	1.081599531	0.612490057
iPSC-CVPC	Heart	donor	G	52	0.959254213	0.862229687	1.067690602	0.449765765
iPSC-CVPC	Heart	donor	G	53	0.849347187	0.764066957	0.944529418	0.002451882
iPSC-CVPC	Heart	donor	G	54	0.895376824	0.805363027	0.995875235	0.040408069
iPSC-CVPC	Heart	donor	G	55	0.891792918	0.802604015	0.991302326	0.031875548
iPSC-CVPC	Heart	donor	G	56	0.923906201	0.8307206	1.02805124	0.144728239
iPSC-CVPC	Heart	donor	G	57	0.965810741	0.867684105	1.075525526	0.533089676
iPSC-CVPC	Heart	donor	G	58	0.936085378	0.840918527	1.042513147	0.221193417
iPSC-CVPC	Heart	donor	G	59	0.941043716	0.846242617	1.046911834	0.258281709
iPSC-CVPC	Heart	donor	G	60	0.945591844	0.850436521	1.051893461	0.294572721
iPSC-CVPC	Heart	donor	G	61	0.895803385	0.806050652	0.995983855	0.041110314
iPSC-CVPC	Heart	donor	G	62	0.911658068	0.819856757	1.014230718	0.084203875
iPSC-CVPC	Heart	donor	G	63	0.886879848	0.797778835	0.986369311	0.025193963
iPSC-CVPC	Heart	donor	G	64	0.955553098	0.858900978	1.063543436	0.402675161
iPSC-CVPC	Heart	donor	G	65	0.970325427	0.872423398	1.079827303	0.590420851
iPSC-CVPC	Heart	donor	G	66	0.904896345	0.814633321	1.005569927	0.061409242
iPSC-CVPC	Heart	donor	G	67	0.910674812	0.818852349	1.013240761	0.083741371
iPSC-CVPC	Heart	donor	G	68	0.889537008	0.80073743	0.988573439	0.028134279
iPSC-CVPC	Heart	donor	G	69	0.86181402	0.774226286	0.959725898	0.006198497
iPSC-CVPC	Heart	donor	G	70	0.85564565	0.769282868	0.952096089	0.003955563
iPSC-CVPC	Heart	donor	G	71	0.892786234	0.801895979	0.99440115	0.037713882
iPSC-CVPC	Heart	donor	G	72	0.932167784	0.836991553	1.038673902	0.199001446
iPSC-CVPC	Heart	donor	G	73	0.915017029	0.824429144	1.015984034	0.095185791
iPSC-CVPC	Heart	donor	G	74	0.898976892	0.808095152	1.000526483	0.047757888
iPSC-CVPC	Heart	donor	G	75	0.892019342	0.802402491	0.99207405	0.033213609
iPSC-CVPC	Heart	donor	G	76	0.940000036	0.844978995	1.046219394	0.256428461
iPSC-CVPC	Heart	donor	G	77	0.912545399	0.820617511	1.015231867	0.089154394
iPSC-CVPC	Heart	donor	G	78	0.862021027	0.774871804	0.959376278	0.005983661
iPSC-CVPC	Heart	donor	G	79	0.955548495	0.858849601	1.063598517	0.402440286
iPSC-CVPC	Heart	donor	G	80	0.914409688	0.822413823	1.017158175	0.094841686
iPSC-CVPC	Heart	donor	G	81	0.979252125	0.879158917	1.091382142	0.702762381
iPSC-CVPC	Heart	donor	G	82	0.973048913	0.875112448	1.082547766	0.610289792
iPSC-CVPC	Heart	donor	G	83	0.833060212	0.74992898	0.925739144	0.000634257
iPSC-CVPC	Heart	donor	G	84	0.912311941	0.820181484	1.015247796	0.088361495
iPSC-CVPC	Heart	donor	G	85	0.986053586	0.886887999	1.0968386	0.809616311
iPSC-CVPC	Heart	donor	G	86	0.849247021	0.763623154	0.944862247	0.002563643
iPSC-CVPC	Heart	donor	G	87	0.881566487	0.793353199	0.979999883	0.018080922
iPSC-CVPC	Heart	donor	G	88	0.838401963	0.752928517	0.933936113	0.00128587
iPSC-CVPC	Heart	donor	G	89	0.963866274	0.866709554	1.072360667	0.501666109
iPSC-CVPC	Heart	donor	G	90	0.910961294	0.819382782	1.013235634	0.084676524
iPSC-CVPC	Heart	donor	G	91	0.924976203	0.831875601	1.028954064	0.145903108
iPSC-CVPC	Heart	donor	G	92	0.952015716	0.856664621	1.05844885	0.363377358
iPSC-CVPC	Heart	donor	G	93	0.93101761	0.835617719	1.037830718	0.19715798
iPSC-CVPC	Heart	donor	G	94	0.918967391	0.825745307	1.023228021	0.121244094
iPSC-CVPC	Heart	donor	G	95	0.920277574	0.827357462	1.024108672	0.123306438
iPSC-CVPC	Heart	donor	G	96	0.959218095	0.861033727	1.069115671	0.444169556
iPSC-CVPC	Heart	donor	G	97	0.981414676	0.880541382	1.094488799	0.742189512
iPSC-CVPC	Heart	donor	G	98	0.922583282	0.830073887	1.025885643	0.132865388
iPSC-CVPC	Heart	donor	G	99	0.915482733	0.822689938	1.019240232	0.103200305
iPSC-CVPC	Heart	donor	G	100	0.960181225	0.862743897	1.069125993	0.464583306
iPSC-CVPC	Heart	donor	T	1	0.622820737	0.520099224	0.746605094	2.21E-07
iPSC-CVPC	Heart	donor	T	2	1.069083598	0.976226733	1.170834279	0.148818992
iPSC-CVPC	Heart	donor	T	3	1.167717326	1.065647114	1.27974876	0.000781923
iPSC-CVPC	Heart	donor	T	4	0.752486869	0.656314898	0.863352005	4.51E-05
iPSC-CVPC	Heart	donor	T	5	0.901924987	0.788449479	1.032752343	0.131608213
iPSC-CVPC	Heart	donor	T	6	1.014237725	0.918561103	1.120258008	0.783531018
iPSC-CVPC	Heart	donor	T	7	1.151021461	1.045632672	1.267415592	0.00390965
iPSC-CVPC	Heart	donor	T	8	1.051036446	0.94933408	1.164132195	0.343911216
iPSC-CVPC	Heart	donor	T	9	1.082334353	0.979551734	1.196261238	0.120772517
iPSC-CVPC	Heart	donor	T	10	0.964010208	0.873686096	1.06392614	0.470633518
iPSC-CVPC	Heart	donor	T	11	1.187195038	1.073334236	1.313714473	0.000766583
iPSC-CVPC	Heart	donor	T	12	1.131394	1.023048903	1.251716612	0.015695265
iPSC-CVPC	Heart	donor	T	13	1.135934571	1.028925896	1.254568594	0.010801646
iPSC-CVPC	Heart	donor	T	14	1.068884137	0.969697318	1.178540873	0.178383455
iPSC-CVPC	Heart	donor	T	15	1.131361613	1.025714278	1.248354442	0.013183334
iPSC-CVPC	Heart	donor	T	16	1.12475471	1.018607855	1.242479804	0.019669123
iPSC-CVPC	Heart	donor	T	17	1.176488676	1.065122264	1.299988911	0.001262779
iPSC-CVPC	Heart	donor	T	18	1.09168538	0.989116844	1.205418484	0.078845606
iPSC-CVPC	Heart	donor	T	19	1.149497749	1.041283384	1.269441396	0.005234358
iPSC-CVPC	Heart	donor	T	20	1.069333807	0.970244801	1.17886009	0.178968229
iPSC-CVPC	Heart	donor	T	21	1.018630211	0.923915806	1.123384312	0.712208737
iPSC-CVPC	Heart	donor	T	22	1.161091003	1.052326339	1.281582996	0.002714699
iPSC-CVPC	Heart	donor	T	23	1.08953245	0.987257074	1.202759723	0.08801497
iPSC-CVPC	Heart	donor	T	24	1.124865799	1.01843022	1.242952029	0.019360847
iPSC-CVPC	Heart	donor	T	25	1.140759881	1.032539081	1.260845756	0.008896436
iPSC-CVPC	Heart	donor	T	26	1.111419985	1.006718524	1.227536097	0.035077841
iPSC-CVPC	Heart	donor	T	27	1.138078899	1.029840948	1.258230533	0.01081681
iPSC-CVPC	Heart	donor	T	28	1.21469023	1.099070705	1.343024957	0.000114997
iPSC-CVPC	Heart	donor	T	29	1.124860888	1.017922617	1.243580326	0.020085913
iPSC-CVPC	Heart	donor	T	30	1.136408749	1.028760464	1.2558427	0.011134119
iPSC-CVPC	Heart	donor	T	31	1.137318633	1.03052413	1.255660141	0.01029833
iPSC-CVPC	Heart	donor	T	32	1.102860412	0.999626479	1.217257168	0.048673087
iPSC-CVPC	Heart	donor	T	33	1.190658911	1.076363037	1.317683669	0.000632699
iPSC-CVPC	Heart	donor	T	34	1.186788539	1.072626005	1.313692874	0.000809849
iPSC-CVPC	Heart	donor	T	35	1.074734143	0.972205364	1.188460288	0.158804131
iPSC-CVPC	Heart	donor	T	36	1.058283468	0.957467546	1.170129064	0.268410736
iPSC-CVPC	Heart	donor	T	37	1.155586568	1.044392218	1.279200616	0.004687859
iPSC-CVPC	Heart	donor	T	38	1.093971899	0.990730946	1.208468534	0.07347797
iPSC-CVPC	Heart	donor	T	39	1.123437177	1.016283095	1.242488053	0.022413416
iPSC-CVPC	Heart	donor	T	40	1.166824928	1.055784832	1.290086453	0.002330811
iPSC-CVPC	Heart	donor	T	41	1.141393035	1.033188275	1.261448069	0.008936569
iPSC-CVPC	Heart	donor	T	42	1.084983093	0.981985554	1.199168145	0.109364313
iPSC-CVPC	Heart	donor	T	43	1.086980244	0.983419947	1.201867319	0.102696823
iPSC-CVPC	Heart	donor	T	44	1.060824572	0.959811169	1.172874319	0.24759051
iPSC-CVPC	Heart	donor	T	45	1.064525094	0.963454473	1.176587728	0.219589333
iPSC-CVPC	Heart	donor	T	46	1.119133054	1.013553762	1.236221831	0.025528276
iPSC-CVPC	Heart	donor	T	47	1.139209057	1.031054411	1.259237043	0.010204659
iPSC-CVPC	Heart	donor	T	48	1.024187029	0.92717301	1.131770979	0.651748074
iPSC-CVPC	Heart	donor	T	49	1.206080674	1.09001918	1.335096078	0.000239053
iPSC-CVPC	Heart	donor	T	50	1.183537279	1.069962112	1.30973231	0.000912096
iPSC-CVPC	Heart	donor	T	51	1.207985702	1.091366728	1.337742743	0.000228176
iPSC-CVPC	Heart	donor	T	52	1.052679671	0.953292195	1.16280614	0.306824573
iPSC-CVPC	Heart	donor	T	53	1.145181475	1.037521426	1.264497866	0.006621014
iPSC-CVPC	Heart	donor	T	54	1.182062979	1.068950554	1.307691946	0.001027248
iPSC-CVPC	Heart	donor	T	55	1.161453272	1.050384528	1.284828383	0.003336266
iPSC-CVPC	Heart	donor	T	56	1.040179445	0.942196005	1.148734268	0.440264567
iPSC-CVPC	Heart	donor	T	57	1.105486949	1.000402243	1.222168676	0.048000593
iPSC-CVPC	Heart	donor	T	58	1.158401641	1.048344877	1.280560123	0.003543688
iPSC-CVPC	Heart	donor	T	59	1.175959724	1.063916064	1.300320218	0.001396655
iPSC-CVPC	Heart	donor	T	60	1.118476814	1.011854196	1.236910839	0.027329197
iPSC-CVPC	Heart	donor	T	61	1.156699897	1.046982674	1.278451855	0.003888444
iPSC-CVPC	Heart	donor	T	62	1.092656509	0.988452508	1.208217405	0.083102708
iPSC-CVPC	Heart	donor	T	63	1.10775779	1.002309148	1.224843521	0.044987332
iPSC-CVPC	Heart	donor	T	64	1.132571953	1.024830109	1.252148133	0.01427705
iPSC-CVPC	Heart	donor	T	65	1.064810271	0.96395036	1.176604073	0.220680706
iPSC-CVPC	Heart	donor	T	66	1.115652396	1.009606793	1.233403095	0.031433036
iPSC-CVPC	Heart	donor	T	67	1.101255311	0.995888739	1.218376378	0.05872359
iPSC-CVPC	Heart	donor	T	68	1.130781182	1.022915968	1.250583043	0.015054454
iPSC-CVPC	Heart	donor	T	69	1.133626867	1.025752749	1.253379682	0.013300189
iPSC-CVPC	Heart	donor	T	70	1.095119546	0.991440471	1.210207446	0.072430226
iPSC-CVPC	Heart	donor	T	71	1.111737409	1.005853512	1.229376158	0.037427104
iPSC-CVPC	Heart	donor	T	72	1.102873639	0.997153704	1.2203917	0.054963866
iPSC-CVPC	Heart	donor	T	73	1.137804498	1.028424737	1.259403167	0.011552872
iPSC-CVPC	Heart	donor	T	74	1.158597728	1.04802271	1.28140187	0.003680552
iPSC-CVPC	Heart	donor	T	75	1.114708221	1.008453671	1.232677601	0.033009583
iPSC-CVPC	Heart	donor	T	76	1.1066202	1.001355858	1.223503601	0.045145289
iPSC-CVPC	Heart	donor	T	77	1.128886101	1.021720363	1.247818648	0.016601912
iPSC-CVPC	Heart	donor	T	78	1.104266433	0.99909478	1.221040056	0.050473601
iPSC-CVPC	Heart	donor	T	79	1.102486228	0.997220965	1.219508919	0.055902375
iPSC-CVPC	Heart	donor	T	80	1.170724463	1.05886191	1.294963524	0.001897467
iPSC-CVPC	Heart	donor	T	81	1.155473314	1.045256267	1.277863435	0.004327791
iPSC-CVPC	Heart	donor	T	82	1.099924861	0.996241767	1.21493219	0.059156207
iPSC-CVPC	Heart	donor	T	83	1.096649439	0.992611108	1.212152463	0.068054149
iPSC-CVPC	Heart	donor	T	84	1.132985776	1.025094683	1.252756757	0.014179968
iPSC-CVPC	Heart	donor	T	85	1.124298201	1.016288011	1.244455081	0.021497221
iPSC-CVPC	Heart	donor	T	86	1.097639286	0.994344811	1.212211822	0.062963273
iPSC-CVPC	Heart	donor	T	87	1.141408469	1.031742489	1.263308513	0.009359093
iPSC-CVPC	Heart	donor	T	88	1.104891195	1.000860759	1.220209321	0.047342198
iPSC-CVPC	Heart	donor	T	89	1.166320466	1.054325242	1.290789427	0.002518706
iPSC-CVPC	Heart	donor	T	90	1.095866663	0.991869071	1.211336926	0.071762785
iPSC-CVPC	Heart	donor	T	91	1.079962333	0.976998234	1.194190393	0.131510803
iPSC-CVPC	Heart	donor	T	92	1.10246413	0.997447299	1.219105094	0.053486508
iPSC-CVPC	Heart	donor	T	93	1.068975402	0.967475535	1.181507124	0.192716955
iPSC-CVPC	Heart	donor	T	94	1.117141557	1.009949708	1.23629973	0.029932095
iPSC-CVPC	Heart	donor	T	95	1.162185012	1.051327642	1.285284199	0.002914665
iPSC-CVPC	Heart	donor	T	96	1.138504975	1.030116364	1.258839939	0.010738077
iPSC-CVPC	Heart	donor	T	97	1.090357977	0.987155094	1.204745909	0.085441021
iPSC-CVPC	Heart	donor	T	98	1.095602485	0.991137976	1.21168072	0.074353052
iPSC-CVPC	Heart	donor	T	99	1.129451509	1.021827791	1.248961422	0.016210446
iPSC-CVPC	Heart	donor	T	100	1.181333092	1.067141312	1.308333421	0.001194259
Heart	Arteria	acceptor	A	0	1.034520709	0.802512838	1.333842733	0.801820454
Heart	Arteria	acceptor	A	-1	0.905590431	0.70453245	1.163795413	0.456356397
Heart	Arteria	acceptor	A	-2	0.881100651	0.679708355	1.141778885	0.336804973
Heart	Arteria	acceptor	A	-3	1.127992981	0.869886146	1.463507508	0.368849388
Heart	Arteria	acceptor	A	-4	0.964925224	0.740867469	1.256772144	0.794320948
Heart	Arteria	acceptor	A	-5	0.948631137	0.729657423	1.233277642	0.697608682
Heart	Arteria	acceptor	A	-6	1.111012326	0.855871571	1.44311317	0.439178974
Heart	Arteria	acceptor	A	-7	1.004979226	0.775069369	1.303184027	1
Heart	Arteria	acceptor	A	-8	1.019127582	0.776846456	1.337319949	0.893568124
Heart	Arteria	acceptor	A	-9	1.008133847	0.771870092	1.316960639	1
Heart	Arteria	acceptor	A	-10	1.11949035	0.868376783	1.443899592	0.379639229
Heart	Arteria	acceptor	A	-11	0.990181788	0.759572199	1.290895562	0.947863737
Heart	Arteria	acceptor	A	-12	0.948591635	0.733784304	1.226315331	0.703390785
Heart	Arteria	acceptor	A	-13	1.101340431	0.842068997	1.44133035	0.507492333
Heart	Arteria	acceptor	A	-14	0.843317526	0.648289508	1.096387388	0.19515804
Heart	Arteria	acceptor	A	-15	0.696261735	0.532954232	0.908330881	0.00602132
Heart	Arteria	acceptor	A	-16	1.037493756	0.801489891	1.343329246	0.798652299
Heart	Arteria	acceptor	A	-17	0.979952496	0.757223419	1.268250848	0.898614653
Heart	Arteria	acceptor	A	-18	1.078224477	0.827652145	1.40534372	0.601186335
Heart	Arteria	acceptor	A	-19	0.925497853	0.713669285	1.199968196	0.5636567
Heart	Arteria	acceptor	A	-20	0.974654508	0.741527791	1.281129869	0.892697211
Heart	Arteria	acceptor	A	-21	0.972074905	0.750943377	1.258386523	0.848284904
Heart	Arteria	acceptor	A	-22	0.925403334	0.71318957	1.200527576	0.56285826
Heart	Arteria	acceptor	A	-23	1.018904706	0.789619163	1.31498004	0.899738773
Heart	Arteria	acceptor	A	-24	1.102129827	0.842099662	1.443359646	0.465858387
Heart	Arteria	acceptor	A	-25	0.974210418	0.743310161	1.276861737	0.893778621
Heart	Arteria	acceptor	A	-26	0.96598687	0.733520056	1.272111991	0.838610527
Heart	Arteria	acceptor	A	-27	0.819010652	0.632046974	1.060584486	0.12540087
Heart	Arteria	acceptor	A	-28	1.005989812	0.774100986	1.307570249	1
Heart	Arteria	acceptor	A	-29	0.848988551	0.644251508	1.117997873	0.248327562
Heart	Arteria	acceptor	A	-30	1.086997074	0.841518558	1.404683231	0.527042386
Heart	Arteria	acceptor	A	-31	0.980647783	0.755674856	1.272699359	0.897591547
Heart	Arteria	acceptor	A	-32	0.980507322	0.756008277	1.271788869	0.897800568
Heart	Arteria	acceptor	A	-33	0.769894315	0.585293961	1.011576042	0.059449573
Heart	Arteria	acceptor	A	-34	0.846669162	0.647377782	1.106654712	0.209869291
Heart	Arteria	acceptor	A	-35	0.922901695	0.702028361	1.212982613	0.589475809
Heart	Arteria	acceptor	A	-36	0.743697678	0.576660434	0.958243669	0.020520981
Heart	Arteria	acceptor	A	-37	0.726823199	0.554007331	0.952288656	0.019793507
Heart	Arteria	acceptor	A	-38	1.015213409	0.78000312	1.32154601	0.948086634
Heart	Arteria	acceptor	A	-39	1.219772909	0.938492217	1.586911583	0.136752499
Heart	Arteria	acceptor	A	-40	1.166938261	0.888969501	1.5332725	0.254696524
Heart	Arteria	acceptor	A	-41	0.805745669	0.607971534	1.066759632	0.128233194
Heart	Arteria	acceptor	A	-42	0.948555543	0.725450689	1.240224574	0.691855753
Heart	Arteria	acceptor	A	-43	1.104350466	0.848963264	1.437331559	0.474828604
Heart	Arteria	acceptor	A	-44	0.965397739	0.737862244	1.263115301	0.791139632
Heart	Arteria	acceptor	A	-45	1.00448781	0.775564454	1.301144928	1
Heart	Arteria	acceptor	A	-46	0.811310525	0.620765588	1.059493478	0.114392328
Heart	Arteria	acceptor	A	-47	1.047743151	0.797745072	1.376558703	0.737003596
Heart	Arteria	acceptor	A	-48	0.899517219	0.686833342	1.177609516	0.464339216
Heart	Arteria	acceptor	A	-49	0.925589792	0.714142296	1.199414125	0.564447143
Heart	Arteria	acceptor	A	-50	1.01614316	0.77925794	1.325301991	0.947726553
Heart	Arteria	acceptor	A	-51	0.729697943	0.557378721	0.954082162	0.017561927
Heart	Arteria	acceptor	A	-52	0.94838788	0.721248765	1.247031678	0.735608098
Heart	Arteria	acceptor	A	-53	1.092667479	0.841740301	1.419082331	0.519166011
Heart	Arteria	acceptor	A	-54	1.023344816	0.786962384	1.331000601	0.896741545
Heart	Arteria	acceptor	A	-55	0.804596529	0.615781488	1.050415327	0.100436679
Heart	Arteria	acceptor	A	-56	0.957055193	0.728649599	1.25704659	0.787859674
Heart	Arteria	acceptor	A	-57	0.991934959	0.756356876	1.301019221	1
Heart	Arteria	acceptor	A	-58	0.984799111	0.744920035	1.30206503	0.945133759
Heart	Arteria	acceptor	A	-59	0.802452626	0.60337312	1.066080402	0.123863008
Heart	Arteria	acceptor	A	-60	0.858548675	0.653300748	1.127603752	0.281667606
Heart	Arteria	acceptor	A	-61	0.887499221	0.671290642	1.17278978	0.409489516
Heart	Arteria	acceptor	A	-62	0.924890626	0.710687144	1.203407015	0.558742577
Heart	Arteria	acceptor	A	-63	0.836357042	0.63699248	1.097348509	0.202784873
Heart	Arteria	acceptor	A	-64	1.151431762	0.879994015	1.507898703	0.319526176
Heart	Arteria	acceptor	A	-65	0.686559366	0.52419135	0.897810609	0.004591758
Heart	Arteria	acceptor	A	-66	0.592043145	0.447558054	0.781158533	0.00014634
Heart	Arteria	acceptor	A	-67	0.864811981	0.65636783	1.138822708	0.308416957
Heart	Arteria	acceptor	A	-68	0.940514667	0.720928604	1.226808954	0.6464085
Heart	Arteria	acceptor	A	-69	0.940003843	0.716114723	1.233661885	0.687234084
Heart	Arteria	acceptor	A	-70	0.860781175	0.65734995	1.126550485	0.287726071
Heart	Arteria	acceptor	A	-71	0.799875839	0.609212174	1.049259513	0.108037674
Heart	Arteria	acceptor	A	-72	0.908632329	0.696409271	1.185209045	0.470946551
Heart	Arteria	acceptor	A	-73	0.940765494	0.723767504	1.222602372	0.650668417
Heart	Arteria	acceptor	A	-74	1.198736292	0.918118241	1.566646428	0.188083947
Heart	Arteria	acceptor	A	-75	0.932308522	0.713911301	1.217281841	0.598844349
Heart	Arteria	acceptor	A	-76	0.802638226	0.613040318	1.049952986	0.098125098
Heart	Arteria	acceptor	A	-77	0.813891509	0.614444675	1.077038384	0.147098396
Heart	Arteria	acceptor	A	-78	1.014410204	0.765078149	1.345382536	0.944596276
Heart	Arteria	acceptor	A	-79	0.902021034	0.677633324	1.200195736	0.481858845
Heart	Arteria	acceptor	A	-80	1.212363805	0.899927958	1.635801167	0.21306353
Heart	Arteria	acceptor	A	-81	0.859837873	0.638015019	1.157851229	0.306282087
Heart	Arteria	acceptor	A	-82	1.253210027	0.917328717	1.715578932	0.146699577
Heart	Arteria	acceptor	A	-83	0.869756486	0.621202211	1.21639821	0.411797824
Heart	Arteria	acceptor	A	-84	1.000865148	0.695589075	1.440674727	1
Heart	Arteria	acceptor	A	-85	1.23356593	0.88298658	1.727530723	0.219952464
Heart	Arteria	acceptor	A	-86	1.013460631	0.712972468	1.441309818	1
Heart	Arteria	acceptor	A	-87	1.152233502	0.814594646	1.632917302	0.445330957
Heart	Arteria	acceptor	A	-88	1.03760752	0.712212998	1.512986859	0.854836999
Heart	Arteria	acceptor	A	-89	1.247635085	0.877086653	1.780031055	0.228435854
Heart	Arteria	acceptor	A	-90	1.194583114	0.815216512	1.755781447	0.353382874
Heart	Arteria	acceptor	A	-91	0.955131594	0.67034704	1.360716016	0.795943451
Heart	Arteria	acceptor	A	-92	1.115877225	0.792074534	1.574457228	0.557094283
Heart	Arteria	acceptor	A	-93	1.265855786	0.898569831	1.788416446	0.180475001
Heart	Arteria	acceptor	A	-94	1.308412325	0.909199636	1.890087391	0.133230981
Heart	Arteria	acceptor	A	-95	1.160580798	0.881883326	1.528778368	0.279166709
Heart	Arteria	acceptor	A	-96	0.993732585	0.717559342	1.376483875	1
Heart	Arteria	acceptor	A	-97	1.152239171	0.921260847	1.441391235	0.221802382
Heart	Arteria	acceptor	A	-98	0.850224638	0.673446571	1.073110333	0.166181561
Heart	Arteria	acceptor	A	-99	0.987950185	0.735602854	1.327023899	0.942242969
Heart	Arteria	acceptor	C	0	1.002812155	0.760370124	1.322787997	1
Heart	Arteria	acceptor	C	-1	1.020929137	0.775332138	1.344736607	0.892124215
Heart	Arteria	acceptor	C	-2	0.925206399	0.71220966	1.20166259	0.561236993
Heart	Arteria	acceptor	C	-3	0.853716748	0.659511557	1.104521012	0.226483187
Heart	Arteria	acceptor	C	-4	0.865749401	0.666629691	1.123817767	0.273379493
Heart	Arteria	acceptor	C	-5	0.964649375	0.742453524	1.253374693	0.79603292
Heart	Arteria	acceptor	C	-6	0.900490385	0.689433484	1.175728853	0.430030896
Heart	Arteria	acceptor	C	-7	0.842420224	0.646812512	1.096546645	0.193249189
Heart	Arteria	acceptor	C	-8	0.885874981	0.679498436	1.154443321	0.36041769
Heart	Arteria	acceptor	C	-9	1.031814204	0.793707746	1.341612056	0.845823112
Heart	Arteria	acceptor	C	-10	0.914835224	0.696615349	1.20104956	0.545370761
Heart	Arteria	acceptor	C	-11	0.964856666	0.741272574	1.255908018	0.794755893
Heart	Arteria	acceptor	C	-12	0.809559163	0.613390833	1.06746599	0.133554095
Heart	Arteria	acceptor	C	-13	0.820629206	0.618789133	1.087323338	0.165549649
Heart	Arteria	acceptor	C	-14	1.090197359	0.826937241	1.438170906	0.539953
Heart	Arteria	acceptor	C	-15	1.698502146	1.302852576	2.219797462	5.93E-05
Heart	Arteria	acceptor	C	-16	1.144273394	0.87847553	1.491546851	0.327561246
Heart	Arteria	acceptor	C	-17	1.026200251	0.785176353	1.341492695	0.894811204
Heart	Arteria	acceptor	C	-18	1.191200271	0.920266668	1.543171616	0.180836247
Heart	Arteria	acceptor	C	-19	1.049319791	0.80715986	1.36445505	0.745871567
Heart	Arteria	acceptor	C	-20	0.917166712	0.704950098	1.192997326	0.516344516
Heart	Arteria	acceptor	C	-21	1.274019264	0.96257454	1.68873764	0.084878015
Heart	Arteria	acceptor	C	-22	0.940514667	0.720928604	1.226808954	0.6464085
Heart	Arteria	acceptor	C	-23	0.843317526	0.648289508	1.096387388	0.19515804
Heart	Arteria	acceptor	C	-24	1.089202077	0.834729746	1.421982185	0.554198651
Heart	Arteria	acceptor	C	-25	0.876480301	0.669858333	1.146300485	0.321139008
Heart	Arteria	acceptor	C	-26	0.933522369	0.722404586	1.206102561	0.612372099
Heart	Arteria	acceptor	C	-27	1.070206371	0.828122089	1.383660678	0.612125903
Heart	Arteria	acceptor	C	-28	0.805228689	0.61667039	1.050559111	0.10119942
Heart	Arteria	acceptor	C	-29	1.006248535	0.77383507	1.30869405	1
Heart	Arteria	acceptor	C	-30	1.205829702	0.924985633	1.573442019	0.169430501
Heart	Arteria	acceptor	C	-31	0.991138841	0.757813693	1.296417697	0.94727382
Heart	Arteria	acceptor	C	-32	0.922578499	0.700727931	1.214376147	0.587522265
Heart	Arteria	acceptor	C	-33	1.175999522	0.915343289	1.511892417	0.193808836
Heart	Arteria	acceptor	C	-34	1.125552751	0.869454381	1.457870422	0.371899404
Heart	Arteria	acceptor	C	-35	1.028126642	0.783951393	1.348708408	0.841150736
Heart	Arteria	acceptor	C	-36	1.368420081	1.053278716	1.780332521	0.017100775
Heart	Arteria	acceptor	C	-37	1.198736292	0.918118241	1.566646428	0.188083947
Heart	Arteria	acceptor	C	-38	1.072357238	0.828000992	1.389394375	0.609159319
Heart	Arteria	acceptor	C	-39	0.876480301	0.669858333	1.146300485	0.321139008
Heart	Arteria	acceptor	C	-40	1.027731858	0.784203376	1.347240275	0.841561699
Heart	Arteria	acceptor	C	-41	1.02890199	0.795073516	1.331753118	0.848433165
Heart	Arteria	acceptor	C	-42	1.038278118	0.80121277	1.345803093	0.797817643
Heart	Arteria	acceptor	C	-43	0.857599258	0.651594851	1.128024212	0.279168824
Heart	Arteria	acceptor	C	-44	0.782033067	0.600992867	1.016637135	0.060521796
Heart	Arteria	acceptor	C	-45	1.16337123	0.888144772	1.525201527	0.258447255
Heart	Arteria	acceptor	C	-46	0.924666017	0.709635854	1.204598935	0.557036709
Heart	Arteria	acceptor	C	-47	1.07760342	0.827689749	1.403653335	0.602021526
Heart	Arteria	acceptor	C	-48	0.90181197	0.693071795	1.173017885	0.436091174
Heart	Arteria	acceptor	C	-49	1.046729774	0.798121678	1.373210071	0.738348698
Heart	Arteria	acceptor	C	-50	0.972598571	0.749242827	1.262605403	0.846757758
Heart	Arteria	acceptor	C	-51	1.221129631	0.938971019	1.589667635	0.135877866
Heart	Arteria	acceptor	C	-52	1.10287896	0.848848001	1.433678585	0.476803673
Heart	Arteria	acceptor	C	-53	0.99362051	0.753095859	1.311147921	1
Heart	Arteria	acceptor	C	-54	0.926164244	0.717273019	1.195677781	0.569764326
Heart	Arteria	acceptor	C	-55	1.15206051	0.890585974	1.491247644	0.279723992
Heart	Arteria	acceptor	C	-56	1.059949969	0.821662472	1.367854225	0.659543526
Heart	Arteria	acceptor	C	-57	1.048857504	0.807283433	1.363024207	0.746417564
Heart	Arteria	acceptor	C	-58	1.129674757	0.870183566	1.467396343	0.366769238
Heart	Arteria	acceptor	C	-59	1.082994193	0.841347135	1.394596462	0.532705133
Heart	Arteria	acceptor	C	-60	1.194873245	0.916928306	1.558487235	0.191194871
Heart	Arteria	acceptor	C	-61	1.296031664	0.999673793	1.682175214	0.047209068
Heart	Arteria	acceptor	C	-62	1.080296553	0.834797973	1.398602068	0.566387748
Heart	Arteria	acceptor	C	-63	1.167950623	0.904267449	1.509576434	0.229839041
Heart	Arteria	acceptor	C	-64	0.971349094	0.753127697	1.252862703	0.850291838
Heart	Arteria	acceptor	C	-65	1.288701488	1.003089652	1.657234708	0.041464273
Heart	Arteria	acceptor	C	-66	1.585531637	1.225341858	2.055476129	0.000316724
Heart	Arteria	acceptor	C	-67	1.141459619	0.883144569	1.476210752	0.310487452
Heart	Arteria	acceptor	C	-68	1.055482368	0.814475842	1.368163024	0.70078304
Heart	Arteria	acceptor	C	-69	1.262816544	0.97837251	1.631593433	0.067858305
Heart	Arteria	acceptor	C	-70	1.158160422	0.896932115	1.4964723	0.255787061
Heart	Arteria	acceptor	C	-71	1.198088546	0.926765709	1.550063468	0.163101363
Heart	Arteria	acceptor	C	-72	1.183144908	0.913305804	1.53391648	0.201088656
Heart	Arteria	acceptor	C	-73	1.178318903	0.907263772	1.531571749	0.22006393
Heart	Arteria	acceptor	C	-74	0.934152547	0.730234054	1.194828634	0.583828328
Heart	Arteria	acceptor	C	-75	0.948632778	0.7300856	1.232547562	0.698214501
Heart	Arteria	acceptor	C	-76	1.140492086	0.877710985	1.482976903	0.331931285
Heart	Arteria	acceptor	C	-77	1.090620978	0.847859736	1.403457148	0.493767435
Heart	Arteria	acceptor	C	-78	1.05601311	0.822076153	1.356834752	0.664984146
Heart	Arteria	acceptor	C	-79	1.235238601	0.95992071	1.590930394	0.092904708
Heart	Arteria	acceptor	C	-80	0.794894043	0.614608154	1.027277757	0.076040492
Heart	Arteria	acceptor	C	-81	1.129807014	0.880480813	1.450472602	0.324413637
Heart	Arteria	acceptor	C	-82	1.093105018	0.853684972	1.40014616	0.500920754
Heart	Arteria	acceptor	C	-83	1.141793887	0.896574904	1.454739441	0.281380951
Heart	Arteria	acceptor	C	-84	1.174187681	0.914753809	1.50818875	0.195435967
Heart	Arteria	acceptor	C	-85	1.051229681	0.822506384	1.343849673	0.71550816
Heart	Arteria	acceptor	C	-86	1.039546233	0.809627562	1.334980983	0.757514096
Heart	Arteria	acceptor	C	-87	1.033930459	0.810785994	1.318659884	0.809741784
Heart	Arteria	acceptor	C	-88	1.19330493	0.932902244	1.527339058	0.161289443
Heart	Arteria	acceptor	C	-89	1.172420852	0.914177994	1.504585969	0.218330059
Heart	Arteria	acceptor	C	-90	1.208612338	0.942280039	1.551341943	0.139595035
Heart	Arteria	acceptor	C	-91	1.027007765	0.811679823	1.29953584	0.86110322
Heart	Arteria	acceptor	C	-92	1.071979393	0.845850674	1.358885502	0.557602898
Heart	Arteria	acceptor	C	-93	1.093603638	0.867270617	1.379338846	0.454897654
Heart	Arteria	acceptor	C	-94	1.100783812	0.864862083	1.401521617	0.437584734
Heart	Arteria	acceptor	C	-95	1.015022299	0.791743889	1.301424005	0.950972286
Heart	Arteria	acceptor	C	-96	1.090445186	0.873101182	1.362089715	0.440116622
Heart	Arteria	acceptor	C	-97	1.073797492	0.834810661	1.381738335	0.575552133
Heart	Arteria	acceptor	C	-98	0.900581369	0.564995509	1.432872454	0.655279407
Heart	Arteria	acceptor	C	-99	1.074937431	0.7738271	1.494746875	0.687157962
Heart	Arteria	acceptor	G	0	0.94083451	0.724677572	1.221258628	0.652029891
Heart	Arteria	acceptor	G	-1	0.848472429	0.657038584	1.095161692	0.206901015
Heart	Arteria	acceptor	G	-2	1.279660118	0.9854573	1.663671734	0.061719611
Heart	Arteria	acceptor	G	-3	0.889615195	0.688354581	1.149395311	0.375200544
Heart	Arteria	acceptor	G	-4	1.155645901	0.886371859	1.507916019	0.294655878
Heart	Arteria	acceptor	G	-5	0.933256111	0.720293685	1.209003624	0.608860999
Heart	Arteria	acceptor	G	-6	0.874330909	0.675027591	1.132056326	0.307032349
Heart	Arteria	acceptor	G	-7	1.075787882	0.827799101	1.39871931	0.604475209
Heart	Arteria	acceptor	G	-8	1.155821985	0.891529568	1.499511193	0.27567415
Heart	Arteria	acceptor	G	-9	0.86241675	0.668204198	1.112574963	0.256907128
Heart	Arteria	acceptor	G	-10	0.972493415	0.749592665	1.261742261	0.847069737
Heart	Arteria	acceptor	G	-11	0.970628969	0.755100433	1.24774149	0.852157831
Heart	Arteria	acceptor	G	-12	1.161929819	0.897959494	1.504551016	0.251903885
Heart	Arteria	acceptor	G	-13	0.955399304	0.745559638	1.224362741	0.713097867
Heart	Arteria	acceptor	G	-14	0.963352387	0.748564145	1.239822137	0.802899935
Heart	Arteria	acceptor	G	-15	0.906070909	0.706168469	1.162337795	0.459454843
Heart	Arteria	acceptor	G	-16	0.80830333	0.625408911	1.04398317	0.100145023
Heart	Arteria	acceptor	G	-17	1.038676919	0.801070918	1.347066156	0.797393596
Heart	Arteria	acceptor	G	-18	0.933135161	0.719378064	1.210204464	0.607405906
Heart	Arteria	acceptor	G	-19	1.215189854	0.940934449	1.570700383	0.129663053
Heart	Arteria	acceptor	G	-20	1.041758081	0.809105316	1.341524071	0.754868489
Heart	Arteria	acceptor	G	-21	0.919045845	0.712646639	1.184996174	0.529612043
Heart	Arteria	acceptor	G	-22	0.948630059	0.731377865	1.230403924	0.699994184
Heart	Arteria	acceptor	G	-23	1.020730047	0.788549748	1.321550431	0.898509155
Heart	Arteria	acceptor	G	-24	0.750203755	0.579338968	0.970525357	0.026100897
Heart	Arteria	acceptor	G	-25	0.851735077	0.662753779	1.094104891	0.215187672
Heart	Arteria	acceptor	G	-26	1.035975622	0.802018232	1.338426214	0.800269555
Heart	Arteria	acceptor	G	-27	0.997265599	0.768014491	1.295041896	1
Heart	Arteria	acceptor	G	-28	0.897065176	0.694673686	1.15813037	0.411611936
Heart	Arteria	acceptor	G	-29	1.042481655	0.799692483	1.359372514	0.793363798
Heart	Arteria	acceptor	G	-30	0.750127006	0.576474626	0.975081089	0.0278987
Heart	Arteria	acceptor	G	-31	0.85639069	0.664349727	1.103444547	0.233577095
Heart	Arteria	acceptor	G	-32	0.932031499	0.712270714	1.219353332	0.59633345
Heart	Arteria	acceptor	G	-33	0.851058126	0.654875719	1.105426172	0.219904383
Heart	Arteria	acceptor	G	-34	0.933368689	0.721121103	1.207826231	0.61028679
Heart	Arteria	acceptor	G	-35	0.861166412	0.665856611	1.113255284	0.253275597
Heart	Arteria	acceptor	G	-36	0.956591169	0.736447246	1.242530137	0.746869985
Heart	Arteria	acceptor	G	-37	0.941121888	0.729975854	1.213142208	0.660227877
Heart	Arteria	acceptor	G	-38	0.8889502	0.686737646	1.15036785	0.372403202
Heart	Arteria	acceptor	G	-39	1.188993292	0.919553017	1.538661198	0.182646431
Heart	Arteria	acceptor	G	-40	1.046202261	0.816053368	1.341454363	0.758514025
Heart	Arteria	acceptor	G	-41	1.043709454	0.808622938	1.3474293	0.752536513
Heart	Arteria	acceptor	G	-42	0.98872747	0.762139396	1.282818985	0.948742602
Heart	Arteria	acceptor	G	-43	1.061863446	0.821450131	1.373129633	0.656962076
Heart	Arteria	acceptor	G	-44	1.142318459	0.8833397	1.478114475	0.309494231
Heart	Arteria	acceptor	G	-45	0.891735891	0.681096727	1.166994373	0.425292869
Heart	Arteria	acceptor	G	-46	1.043709454	0.808622938	1.3474293	0.752536513
Heart	Arteria	acceptor	G	-47	1.026226131	0.796278619	1.322754485	0.850830083
Heart	Arteria	acceptor	G	-48	0.990181788	0.759572199	1.290895562	0.947863737
Heart	Arteria	acceptor	G	-49	1.064322635	0.82841394	1.367916237	0.620342619
Heart	Arteria	acceptor	G	-50	0.911367168	0.70541623	1.177181264	0.486395948
Heart	Arteria	acceptor	G	-51	0.988551637	0.762415148	1.281858216	0.948847197
Heart	Arteria	acceptor	G	-52	0.995193818	0.77066154	1.285283405	1
Heart	Arteria	acceptor	G	-53	0.812594585	0.627257928	1.052014168	0.110756267
Heart	Arteria	acceptor	G	-54	1.13408487	0.870964286	1.477741293	0.361399026
Heart	Arteria	acceptor	G	-55	1.11177524	0.85595887	1.444961712	0.438172023
Heart	Arteria	acceptor	G	-56	0.908822535	0.697000426	1.184703139	0.471928431
Heart	Arteria	acceptor	G	-57	0.886978322	0.682085231	1.153050682	0.364559804
Heart	Arteria	acceptor	G	-58	0.903163479	0.696982902	1.169998176	0.442732836
Heart	Arteria	acceptor	G	-59	0.932937494	0.717960732	1.212051317	0.605166688
Heart	Arteria	acceptor	G	-60	0.716961661	0.547544273	0.937555069	0.012178784
Heart	Arteria	acceptor	G	-61	1.104574835	0.855131355	1.427509693	0.447821077
Heart	Arteria	acceptor	G	-62	0.782051154	0.597383079	1.022795858	0.06423123
Heart	Arteria	acceptor	G	-63	0.798620276	0.611773069	1.041637549	0.088606636
Heart	Arteria	acceptor	G	-64	0.757794156	0.576859233	0.99433063	0.044496949
Heart	Arteria	acceptor	G	-65	0.865265494	0.657218027	1.138556073	0.309696961
Heart	Arteria	acceptor	G	-66	0.813066277	0.618431123	1.068032898	0.138717903
Heart	Arteria	acceptor	G	-67	0.691026971	0.527111493	0.904521249	0.005472418
Heart	Arteria	acceptor	G	-68	0.928814463	0.696235005	1.238728205	0.619868862
Heart	Arteria	acceptor	G	-69	0.846198154	0.639581876	1.118746138	0.241904102
Heart	Arteria	acceptor	G	-70	1.1262307	0.834916027	1.520730137	0.461609865
Heart	Arteria	acceptor	G	-71	0.819140348	0.616582025	1.087222782	0.163116749
Heart	Arteria	acceptor	G	-72	0.764013129	0.570338617	1.02191385	0.063152782
Heart	Arteria	acceptor	G	-73	1.072832863	0.811192439	1.419681771	0.629682204
Heart	Arteria	acceptor	G	-74	0.917583412	0.682644231	1.232932591	0.561503227
Heart	Arteria	acceptor	G	-75	1.153695539	0.861096572	1.547475331	0.349394857
Heart	Arteria	acceptor	G	-76	0.907759746	0.674938809	1.22036736	0.512928799
Heart	Arteria	acceptor	G	-77	0.908762391	0.677804961	1.217917414	0.517056337
Heart	Arteria	acceptor	G	-78	1.122877789	0.84304534	1.496962134	0.437501741
Heart	Arteria	acceptor	G	-79	0.966680229	0.727420283	1.284601387	0.83363887
Heart	Arteria	acceptor	G	-80	1.045677181	0.786931169	1.390047255	0.779396366
Heart	Arteria	acceptor	G	-81	1.134761653	0.851544604	1.513591652	0.396232788
Heart	Arteria	acceptor	G	-82	1.00221815	0.735544151	1.365938476	1
Heart	Arteria	acceptor	G	-83	1.008292548	0.752334541	1.351676787	1
Heart	Arteria	acceptor	G	-84	0.93607963	0.691034176	1.267628481	0.709291688
Heart	Arteria	acceptor	G	-85	0.895334358	0.660795613	1.212430094	0.502150123
Heart	Arteria	acceptor	G	-86	0.84995711	0.620716633	1.162679494	0.317171352
Heart	Arteria	acceptor	G	-87	1.186113422	0.857542566	1.643532731	0.301758261
Heart	Arteria	acceptor	G	-88	0.981057591	0.708928785	1.357805261	0.936555426
Heart	Arteria	acceptor	G	-89	1.058730724	0.765118037	1.466011749	0.750199241
Heart	Arteria	acceptor	G	-90	1.071684607	0.775154617	1.483090474	0.691326381
Heart	Arteria	acceptor	G	-91	1.039205771	0.760225617	1.421290735	0.818119687
Heart	Arteria	acceptor	G	-92	0.933806567	0.679645073	1.282616557	0.696943779
Heart	Arteria	acceptor	G	-93	1	0.698171983	1.432834352	1
Heart	Arteria	acceptor	G	-94	0.904405333	0.615080675	1.32843686	0.639668552
Heart	Arteria	acceptor	G	-95	1.19074007	0.894599151	1.586860588	0.231549093
Heart	Arteria	acceptor	G	-96	0.829576051	0.576727676	1.190968165	0.331299154
Heart	Arteria	acceptor	G	-97	0.690823083	0.395365356	1.192215255	0.192904766
Heart	Arteria	acceptor	G	-98	1.057482136	0.845823984	1.322302187	0.618142135
Heart	Arteria	acceptor	G	-99	0.886195438	0.705531658	1.112817067	0.309196656
Heart	Arteria	acceptor	T	0	1.020360203	0.798652333	1.30377617	0.903454754
Heart	Arteria	acceptor	T	-1	1.278706601	0.99211665	1.649767855	0.052313012
Heart	Arteria	acceptor	T	-2	0.963051136	0.749712202	1.237145492	0.804259691
Heart	Arteria	acceptor	T	-3	1.170914156	0.905125533	1.515913158	0.226984827
Heart	Arteria	acceptor	T	-4	1.034859405	0.810615087	1.321340362	0.808895406
Heart	Arteria	acceptor	T	-5	1.155553542	0.900682009	1.483406224	0.242319498
Heart	Arteria	acceptor	T	-6	1.126374613	0.87962312	1.442931599	0.358708927
Heart	Arteria	acceptor	T	-7	1.085201445	0.84737549	1.390317952	0.540306241
Heart	Arteria	acceptor	T	-8	0.961218056	0.755109354	1.223643383	0.765087897
Heart	Arteria	acceptor	T	-9	1.112077095	0.867034401	1.426983458	0.423292041
Heart	Arteria	acceptor	T	-10	0.991996806	0.774271785	1.271009264	0.951172171
Heart	Arteria	acceptor	T	-11	1.074818541	0.834812768	1.384388414	0.574099066
Heart	Arteria	acceptor	T	-12	1.082706064	0.84713348	1.384259171	0.543542601
Heart	Arteria	acceptor	T	-13	1.120079177	0.87813423	1.429234806	0.366207774
Heart	Arteria	acceptor	T	-14	1.123769844	0.879012193	1.437254669	0.361787934
Heart	Arteria	acceptor	T	-15	0.941022596	0.727666364	1.21676782	0.656579267
Heart	Arteria	acceptor	T	-16	1.050565669	0.815350334	1.353944301	0.707096032
Heart	Arteria	acceptor	T	-17	0.962589857	0.751310663	1.233327858	0.759469512
Heart	Arteria	acceptor	T	-18	0.845686088	0.658453073	1.085662924	0.194268279
Heart	Arteria	acceptor	T	-19	0.849510327	0.658800662	1.094855211	0.209453025
Heart	Arteria	acceptor	T	-20	1.059976328	0.828568623	1.356497517	0.669449506
Heart	Arteria	acceptor	T	-21	0.920474389	0.720086045	1.176401189	0.504407322
Heart	Arteria	acceptor	T	-22	1.186677547	0.92680225	1.520436581	0.17855656
Heart	Arteria	acceptor	T	-23	1.131091998	0.875811773	1.461572886	0.34317896
Heart	Arteria	acceptor	T	-24	1.112251104	0.87186162	1.419470609	0.398679465
Heart	Arteria	acceptor	T	-25	1.336882242	1.043946093	1.713751161	0.020297353
Heart	Arteria	acceptor	T	-26	1.061232853	0.828531043	1.359815029	0.667933091
Heart	Arteria	acceptor	T	-27	1.138949206	0.882573743	1.470651105	0.313416732
Heart	Arteria	acceptor	T	-28	1.336948763	1.041109653	1.718680827	0.019190013
Heart	Arteria	acceptor	T	-29	1.088164714	0.857860864	1.380721629	0.479934924
Heart	Arteria	acceptor	T	-30	1.015814517	0.791330166	1.304190955	0.901802031
Heart	Arteria	acceptor	T	-31	1.194261128	0.929491838	1.53552869	0.154674902
Heart	Arteria	acceptor	T	-32	1.142148335	0.900466881	1.449293416	0.263634816
Heart	Arteria	acceptor	T	-33	1.230521379	0.958028003	1.581779202	0.095346867
Heart	Arteria	acceptor	T	-34	1.103962327	0.860518171	1.416835577	0.423764788
Heart	Arteria	acceptor	T	-35	1.185829086	0.933522375	1.50709264	0.155454526
Heart	Arteria	acceptor	T	-36	1.044519852	0.808417722	1.349877727	0.751569474
Heart	Arteria	acceptor	T	-37	1.18316061	0.925548451	1.513395809	0.181337633
Heart	Arteria	acceptor	T	-38	1.032783903	0.803085033	1.328403936	0.803670944
Heart	Arteria	acceptor	T	-39	0.79851268	0.623402087	1.022180541	0.067136992
Heart	Arteria	acceptor	T	-40	0.823113751	0.642980034	1.053151922	0.113167076
Heart	Arteria	acceptor	T	-41	1.105558395	0.865807551	1.412222735	0.431474899
Heart	Arteria	acceptor	T	-42	1.021176059	0.798351	1.306315703	0.902999928
Heart	Arteria	acceptor	T	-43	0.98270398	0.770782416	1.253009409	0.90428258
Heart	Arteria	acceptor	T	-44	1.133130736	0.885836218	1.450162548	0.329515254
Heart	Arteria	acceptor	T	-45	0.967856478	0.760962376	1.231067382	0.81167973
Heart	Arteria	acceptor	T	-46	1.232601795	0.962352256	1.579975937	0.098438108
Heart	Arteria	acceptor	T	-47	0.880602128	0.688815921	1.125491147	0.302178719
Heart	Arteria	acceptor	T	-48	1.196969549	0.941206234	1.523132473	0.137059038
Heart	Arteria	acceptor	T	-49	0.970937087	0.754278784	1.249889827	0.851374592
Heart	Arteria	acceptor	T	-50	1.105178208	0.860707215	1.419662859	0.422089281
Heart	Arteria	acceptor	T	-51	1.106118265	0.865915408	1.41348435	0.430764495
Heart	Arteria	acceptor	T	-52	0.961956598	0.753223461	1.228575362	0.762232776
Heart	Arteria	acceptor	T	-53	1.117752551	0.877571442	1.424202355	0.36902689
Heart	Arteria	acceptor	T	-54	0.941172731	0.732775276	1.208651947	0.664761959
Heart	Arteria	acceptor	T	-55	0.962589857	0.751310663	1.233327858	0.759469512
Heart	Arteria	acceptor	T	-56	1.065129295	0.834683267	1.359583011	0.629112115
Heart	Arteria	acceptor	T	-57	1.070174038	0.84057987	1.36289319	0.590458162
Heart	Arteria	acceptor	T	-58	0.995731997	0.782896664	1.266513326	1
Heart	Arteria	acceptor	T	-59	1.159735857	0.909999398	1.478745418	0.229971022
Heart	Arteria	acceptor	T	-60	1.265449862	0.998084153	1.605508031	0.046095101
Heart	Arteria	acceptor	T	-61	0.795598599	0.622953753	1.015477348	0.061322313
Heart	Arteria	acceptor	T	-62	1.227301306	0.960138771	1.569928268	0.101146007
Heart	Arteria	acceptor	T	-63	1.213912652	0.951329772	1.549968229	0.116948705
Heart	Arteria	acceptor	T	-64	1.143769017	0.89716891	1.458831621	0.279275793
Heart	Arteria	acceptor	T	-65	1.210229347	0.946465251	1.548481628	0.128458745
Heart	Arteria	acceptor	T	-66	1.169262117	0.920521704	1.485908918	0.192880697
Heart	Arteria	acceptor	T	-67	1.340113802	1.053597879	1.706057113	0.014849727
Heart	Arteria	acceptor	T	-68	1.054969251	0.83406044	1.334719965	0.683407649
Heart	Arteria	acceptor	T	-69	0.966919026	0.762373402	1.226398065	0.813747057
Heart	Arteria	acceptor	T	-70	0.921008637	0.729651561	1.162343611	0.488808705
Heart	Arteria	acceptor	T	-71	1.169748747	0.924015474	1.481459563	0.198630303
Heart	Arteria	acceptor	T	-72	1.120766038	0.886319196	1.417654387	0.352014801
Heart	Arteria	acceptor	T	-73	0.871057355	0.686080073	1.105587363	0.261602996
Heart	Arteria	acceptor	T	-74	0.97481432	0.76628559	1.240135666	0.858086302
Heart	Arteria	acceptor	T	-75	1.004010522	0.795823512	1.266765278	1
Heart	Arteria	acceptor	T	-76	1.128796634	0.895821589	1.422775164	0.302411128
Heart	Arteria	acceptor	T	-77	1.139365246	0.902909527	1.438217043	0.27331026
Heart	Arteria	acceptor	T	-78	0.872719637	0.69029436	1.103061139	0.245912091
Heart	Arteria	acceptor	T	-79	0.914904043	0.724559945	1.155102098	0.452691172
Heart	Arteria	acceptor	T	-80	1.040144909	0.827449041	1.307677431	0.733781073
Heart	Arteria	acceptor	T	-81	0.908797463	0.721279844	1.144935833	0.422607865
Heart	Arteria	acceptor	T	-82	0.820707877	0.654180174	1.029274242	0.081805881
Heart	Arteria	acceptor	T	-83	0.944173407	0.751368726	1.186316732	0.65039625
Heart	Arteria	acceptor	T	-84	0.911168218	0.728792218	1.139066908	0.406279572
Heart	Arteria	acceptor	T	-85	0.924848936	0.737953394	1.158864026	0.501801305
Heart	Arteria	acceptor	T	-86	1.048693783	0.839037713	1.310760981	0.698345492
Heart	Arteria	acceptor	T	-87	0.841601691	0.672568533	1.052853179	0.133399728
Heart	Arteria	acceptor	T	-88	0.861079777	0.689054228	1.075807891	0.184858443
Heart	Arteria	acceptor	T	-89	0.781013689	0.624650607	0.976104223	0.026992933
Heart	Arteria	acceptor	T	-90	0.78014631	0.624210094	0.974619908	0.027205913
Heart	Arteria	acceptor	T	-91	0.974170595	0.77600326	1.223008641	0.821627117
Heart	Arteria	acceptor	T	-92	0.925535408	0.737664788	1.161142969	0.499785564
Heart	Arteria	acceptor	T	-93	0.825887856	0.658291716	1.035831702	0.092067679
Heart	Arteria	acceptor	T	-94	0.859961444	0.68834876	1.074108664	0.185273619
Heart	Arteria	acceptor	T	-95	0.778840963	0.613111876	0.988783539	0.038584749
Heart	Arteria	acceptor	T	-96	0.986367245	0.765926301	1.27038137	0.950110516
Heart	Arteria	acceptor	T	-97	0.748091012	0.532579438	1.048053118	0.083773957
Heart	Arteria	acceptor	T	-98	2.825049837	1.367521855	6.286183523	0.002568781
Heart	Arteria	acceptor	T	-99	1.343056889	0.886477333	2.046942463	0.159861557
iPSC-CVPC	Arteria	acceptor	A	0	1.012581423	0.920224575	1.114607253	0.809321351
iPSC-CVPC	Arteria	acceptor	A	-1	1.029403833	0.935406331	1.133223875	0.562644319
iPSC-CVPC	Arteria	acceptor	A	-2	1.042643711	0.947197942	1.148105676	0.397743106
iPSC-CVPC	Arteria	acceptor	A	-3	1.080960875	0.981701062	1.190618669	0.110720198
iPSC-CVPC	Arteria	acceptor	A	-4	1.019920016	0.926032388	1.12374536	0.696852935
iPSC-CVPC	Arteria	acceptor	A	-5	1.040132415	0.943626113	1.14692208	0.432836469
iPSC-CVPC	Arteria	acceptor	A	-6	1.170355477	1.062518053	1.289629509	0.001240011
iPSC-CVPC	Arteria	acceptor	A	-7	1.091147836	0.990423792	1.202510009	0.07630779
iPSC-CVPC	Arteria	acceptor	A	-8	1.079322578	0.980592523	1.188339505	0.117619833
iPSC-CVPC	Arteria	acceptor	A	-9	1.051584249	0.954079312	1.15947767	0.315774664
iPSC-CVPC	Arteria	acceptor	A	-10	1.177237473	1.069419802	1.296397569	0.000800252
iPSC-CVPC	Arteria	acceptor	A	-11	1.123621809	1.018899392	1.239703826	0.018787452
iPSC-CVPC	Arteria	acceptor	A	-12	1.042470216	0.945361231	1.149990606	0.402980891
iPSC-CVPC	Arteria	acceptor	A	-13	1.069629798	0.970363367	1.179469722	0.178555637
iPSC-CVPC	Arteria	acceptor	A	-14	1.04893591	0.951685085	1.156591722	0.339771791
iPSC-CVPC	Arteria	acceptor	A	-15	1.048167778	0.951011401	1.155713413	0.34002084
iPSC-CVPC	Arteria	acceptor	A	-16	1.052707097	0.956050651	1.159527765	0.297745311
iPSC-CVPC	Arteria	acceptor	A	-17	1.072337904	0.974210226	1.180725498	0.155040946
iPSC-CVPC	Arteria	acceptor	A	-18	1.06875617	0.970897954	1.176866547	0.176737522
iPSC-CVPC	Arteria	acceptor	A	-19	1.051937064	0.955099649	1.158997962	0.307755278
iPSC-CVPC	Arteria	acceptor	A	-20	1.077682258	0.977332089	1.188734394	0.134617015
iPSC-CVPC	Arteria	acceptor	A	-21	1.04675093	0.949817404	1.154002943	0.365694629
iPSC-CVPC	Arteria	acceptor	A	-22	0.984876073	0.895074144	1.084072386	0.753446189
iPSC-CVPC	Arteria	acceptor	A	-23	1.026874473	0.933079536	1.130436339	0.595510513
iPSC-CVPC	Arteria	acceptor	A	-24	1.047967663	0.951838142	1.154173503	0.345316651
iPSC-CVPC	Arteria	acceptor	A	-25	1.071786338	0.972829503	1.181207918	0.158364293
iPSC-CVPC	Arteria	acceptor	A	-26	1.180675345	1.071919687	1.300962852	0.000685043
iPSC-CVPC	Arteria	acceptor	A	-27	1.089323653	0.987442728	1.202161513	0.084953557
iPSC-CVPC	Arteria	acceptor	A	-28	1.064771184	0.967053307	1.172739961	0.200011823
iPSC-CVPC	Arteria	acceptor	A	-29	1.06349099	0.965735786	1.171520701	0.20789385
iPSC-CVPC	Arteria	acceptor	A	-30	1.100979259	0.99993815	1.212772129	0.047850252
iPSC-CVPC	Arteria	acceptor	A	-31	0.980713964	0.890912298	1.079930189	0.697653389
iPSC-CVPC	Arteria	acceptor	A	-32	1.069923998	0.970747671	1.179647509	0.171386882
iPSC-CVPC	Arteria	acceptor	A	-33	1.114082495	1.010610909	1.228710854	0.028112277
iPSC-CVPC	Arteria	acceptor	A	-34	1.046033451	0.949491097	1.152774646	0.367356291
iPSC-CVPC	Arteria	acceptor	A	-35	1.03336845	0.93722883	1.139817664	0.522622949
iPSC-CVPC	Arteria	acceptor	A	-36	1.001416448	0.909307817	1.103277259	0.980573223
iPSC-CVPC	Arteria	acceptor	A	-37	1.050753291	0.954197678	1.157488557	0.320242731
iPSC-CVPC	Arteria	acceptor	A	-38	1.017775669	0.923470398	1.12210525	0.731489219
iPSC-CVPC	Arteria	acceptor	A	-39	1.114979837	1.010833231	1.23048183	0.028901122
iPSC-CVPC	Arteria	acceptor	A	-40	1.038979809	0.94273224	1.145454624	0.448157427
iPSC-CVPC	Arteria	acceptor	A	-41	1.120059957	1.015075515	1.236504051	0.023493089
iPSC-CVPC	Arteria	acceptor	A	-42	1.085387388	0.983745613	1.197989371	0.103608124
iPSC-CVPC	Arteria	acceptor	A	-43	1.018853715	0.924748376	1.122928597	0.714045828
iPSC-CVPC	Arteria	acceptor	A	-44	1.122975215	1.018517862	1.238740284	0.019022187
iPSC-CVPC	Arteria	acceptor	A	-45	1.061228571	0.961132381	1.172194437	0.242220434
iPSC-CVPC	Arteria	acceptor	A	-46	1.063650583	0.964642006	1.173231493	0.219811294
iPSC-CVPC	Arteria	acceptor	A	-47	1.088822266	0.987185884	1.201340393	0.085592904
iPSC-CVPC	Arteria	acceptor	A	-48	1.064088301	0.963405291	1.175744369	0.221374906
iPSC-CVPC	Arteria	acceptor	A	-49	1.074441389	0.974527345	1.184991146	0.148363114
iPSC-CVPC	Arteria	acceptor	A	-50	1.055987168	0.958394062	1.163918746	0.27273991
iPSC-CVPC	Arteria	acceptor	A	-51	1.06934885	0.969636784	1.179745895	0.176519433
iPSC-CVPC	Arteria	acceptor	A	-52	1.064911684	0.964497909	1.176221331	0.213754143
iPSC-CVPC	Arteria	acceptor	A	-53	0.998265205	0.906045132	1.100219008	0.980483229
iPSC-CVPC	Arteria	acceptor	A	-54	1.055028006	0.956877663	1.163667571	0.280268939
iPSC-CVPC	Arteria	acceptor	A	-55	1.008591483	0.915140984	1.111953618	0.88299286
iPSC-CVPC	Arteria	acceptor	A	-56	1.108115984	1.004369247	1.22320164	0.038634413
iPSC-CVPC	Arteria	acceptor	A	-57	1.097085164	0.994757315	1.210378397	0.062256306
iPSC-CVPC	Arteria	acceptor	A	-58	1.091111517	0.988607916	1.20473746	0.083403449
iPSC-CVPC	Arteria	acceptor	A	-59	0.977940178	0.887093635	1.078526485	0.6572083
iPSC-CVPC	Arteria	acceptor	A	-60	1.075260512	0.974053958	1.187404923	0.150256733
iPSC-CVPC	Arteria	acceptor	A	-61	1.148119559	1.040239733	1.267774334	0.005795394
iPSC-CVPC	Arteria	acceptor	A	-62	1.031350515	0.935034477	1.138054334	0.53719727
iPSC-CVPC	Arteria	acceptor	A	-63	0.988398246	0.896341114	1.090321628	0.824069565
iPSC-CVPC	Arteria	acceptor	A	-64	1.064241045	0.96506488	1.174022368	0.210285602
iPSC-CVPC	Arteria	acceptor	A	-65	1.041044559	0.944990706	1.147306817	0.421408857
iPSC-CVPC	Arteria	acceptor	A	-66	0.982415315	0.890869303	1.08380126	0.729213162
iPSC-CVPC	Arteria	acceptor	A	-67	0.989048308	0.897467066	1.090374154	0.825156236
iPSC-CVPC	Arteria	acceptor	A	-68	1.042650629	0.944699943	1.151219962	0.412783946
iPSC-CVPC	Arteria	acceptor	A	-69	0.968360381	0.878754972	1.067495466	0.522981774
iPSC-CVPC	Arteria	acceptor	A	-70	1.032366647	0.936537247	1.138426123	0.523631708
iPSC-CVPC	Arteria	acceptor	A	-71	1.027741061	0.932210949	1.133427004	0.588836891
iPSC-CVPC	Arteria	acceptor	A	-72	1.056652361	0.958927723	1.164743856	0.262004808
iPSC-CVPC	Arteria	acceptor	A	-73	1.033867716	0.93783553	1.140187422	0.50751957
iPSC-CVPC	Arteria	acceptor	A	-74	1.011685181	0.918535503	1.114665959	0.826445445
iPSC-CVPC	Arteria	acceptor	A	-75	1.062486039	0.962778221	1.172950928	0.225326417
iPSC-CVPC	Arteria	acceptor	A	-76	1.063153476	0.962161359	1.175207974	0.229026231
iPSC-CVPC	Arteria	acceptor	A	-77	0.929605103	0.8424313	1.026178975	0.147171671
iPSC-CVPC	Arteria	acceptor	A	-78	0.986501185	0.89091106	1.092839244	0.796800994
iPSC-CVPC	Arteria	acceptor	A	-79	1.00321676	0.905307565	1.112226077	0.958693142
iPSC-CVPC	Arteria	acceptor	A	-80	0.957743745	0.860369785	1.066647646	0.431248361
iPSC-CVPC	Arteria	acceptor	A	-81	1.090857919	0.976581263	1.219237337	0.121296676
iPSC-CVPC	Arteria	acceptor	A	-82	0.994304653	0.888448261	1.113479203	0.932102249
iPSC-CVPC	Arteria	acceptor	A	-83	0.911507249	0.812279638	1.023444296	0.113605307
iPSC-CVPC	Arteria	acceptor	A	-84	0.863178147	0.76639425	0.972754591	0.015078647
iPSC-CVPC	Arteria	acceptor	A	-85	0.955303193	0.844577305	1.081331398	0.473295968
iPSC-CVPC	Arteria	acceptor	A	-86	0.950915899	0.838513974	1.079267616	0.425910889
iPSC-CVPC	Arteria	acceptor	A	-87	0.85240847	0.749307324	0.970387647	0.014704174
iPSC-CVPC	Arteria	acceptor	A	-88	0.863344484	0.754251391	0.989092427	0.032371405
iPSC-CVPC	Arteria	acceptor	A	-89	0.843413593	0.738828025	0.963536488	0.011059344
iPSC-CVPC	Arteria	acceptor	A	-90	0.852840161	0.747695512	0.973512574	0.016910625
iPSC-CVPC	Arteria	acceptor	A	-91	0.896726646	0.790333316	1.018215652	0.088372705
iPSC-CVPC	Arteria	acceptor	A	-92	0.887379151	0.786217691	1.002194859	0.052011799
iPSC-CVPC	Arteria	acceptor	A	-93	0.864769926	0.76039333	0.984195868	0.025514124
iPSC-CVPC	Arteria	acceptor	A	-94	0.845993923	0.741352882	0.966124434	0.012424554
iPSC-CVPC	Arteria	acceptor	A	-95	0.993162574	0.891653757	1.106853984	0.913309994
iPSC-CVPC	Arteria	acceptor	A	-96	0.911507249	0.812279638	1.023444296	0.113605307
iPSC-CVPC	Arteria	acceptor	A	-97	1.145128496	1.053338429	1.244956534	0.001339405
iPSC-CVPC	Arteria	acceptor	A	-98	1.068732792	0.981448155	1.164006826	0.127243558
iPSC-CVPC	Arteria	acceptor	A	-99	0.919299518	0.820323528	1.030845238	0.147751942
iPSC-CVPC	Arteria	acceptor	C	0	0.931953648	0.843046715	1.030653254	0.169383586
iPSC-CVPC	Arteria	acceptor	C	-1	0.963004082	0.870530984	1.065663538	0.458913657
iPSC-CVPC	Arteria	acceptor	C	-2	0.939353589	0.849708723	1.038866423	0.222140114
iPSC-CVPC	Arteria	acceptor	C	-3	0.884923867	0.80112515	0.977819282	0.015058146
iPSC-CVPC	Arteria	acceptor	C	-4	0.88734308	0.802870576	0.981060893	0.019088482
iPSC-CVPC	Arteria	acceptor	C	-5	0.86140579	0.779747668	0.951908582	0.003208051
iPSC-CVPC	Arteria	acceptor	C	-6	0.894783706	0.808450543	0.990688177	0.030148674
iPSC-CVPC	Arteria	acceptor	C	-7	0.936152515	0.846514122	1.035700972	0.201720186
iPSC-CVPC	Arteria	acceptor	C	-8	0.930501344	0.840912143	1.029992445	0.165496206
iPSC-CVPC	Arteria	acceptor	C	-9	0.926326918	0.838281396	1.024027053	0.134582852
iPSC-CVPC	Arteria	acceptor	C	-10	0.939936316	0.848992311	1.041057178	0.235183964
iPSC-CVPC	Arteria	acceptor	C	-11	0.903497946	0.817664273	0.99869068	0.044967971
iPSC-CVPC	Arteria	acceptor	C	-12	0.930138097	0.842134449	1.027735971	0.150480243
iPSC-CVPC	Arteria	acceptor	C	-13	0.914198945	0.826556358	1.011523656	0.081624406
iPSC-CVPC	Arteria	acceptor	C	-14	0.930705998	0.841359354	1.029968085	0.158915208
iPSC-CVPC	Arteria	acceptor	C	-15	0.946277883	0.855680422	1.046875258	0.284043507
iPSC-CVPC	Arteria	acceptor	C	-16	0.972106572	0.87874267	1.075862123	0.591587044
iPSC-CVPC	Arteria	acceptor	C	-17	0.882550616	0.797125723	0.97747728	0.015873027
iPSC-CVPC	Arteria	acceptor	C	-18	0.949067876	0.858769022	1.049210487	0.299158183
iPSC-CVPC	Arteria	acceptor	C	-19	0.930891685	0.841881936	1.029731766	0.160616865
iPSC-CVPC	Arteria	acceptor	C	-20	0.935167741	0.847009447	1.032872022	0.183151552
iPSC-CVPC	Arteria	acceptor	C	-21	0.882983451	0.799047265	0.976023356	0.013664697
iPSC-CVPC	Arteria	acceptor	C	-22	0.930463823	0.841412935	1.029360488	0.160162756
iPSC-CVPC	Arteria	acceptor	C	-23	0.936117263	0.846638574	1.035467396	0.193769956
iPSC-CVPC	Arteria	acceptor	C	-24	0.926545672	0.837729781	1.025169625	0.137896305
iPSC-CVPC	Arteria	acceptor	C	-25	0.852844608	0.7712325	0.943418687	0.001885816
iPSC-CVPC	Arteria	acceptor	C	-26	0.85619725	0.773870565	0.947595653	0.002532074
iPSC-CVPC	Arteria	acceptor	C	-27	0.88564317	0.801889934	0.978472577	0.0162718
iPSC-CVPC	Arteria	acceptor	C	-28	0.930174162	0.841871993	1.028142612	0.156231685
iPSC-CVPC	Arteria	acceptor	C	-29	0.942917226	0.853310683	1.042335366	0.244338218
iPSC-CVPC	Arteria	acceptor	C	-30	0.887743156	0.803638067	0.980973162	0.018461081
iPSC-CVPC	Arteria	acceptor	C	-31	0.890829631	0.804767249	0.986461117	0.024472159
iPSC-CVPC	Arteria	acceptor	C	-32	0.934384987	0.84351231	1.035445934	0.194471724
iPSC-CVPC	Arteria	acceptor	C	-33	0.930512032	0.840760914	1.030204999	0.164698518
iPSC-CVPC	Arteria	acceptor	C	-34	0.861673347	0.778017381	0.954654663	0.004145711
iPSC-CVPC	Arteria	acceptor	C	-35	0.900457935	0.815065105	0.995114053	0.037744342
iPSC-CVPC	Arteria	acceptor	C	-36	0.871777983	0.788189739	0.964560543	0.007524835
iPSC-CVPC	Arteria	acceptor	C	-37	0.915568363	0.827301659	1.013646766	0.089120314
iPSC-CVPC	Arteria	acceptor	C	-38	0.980212083	0.885003472	1.086159594	0.698454888
iPSC-CVPC	Arteria	acceptor	C	-39	0.89013723	0.803647594	0.986342485	0.025178364
iPSC-CVPC	Arteria	acceptor	C	-40	0.965784282	0.872967992	1.068981672	0.506005249
iPSC-CVPC	Arteria	acceptor	C	-41	0.907785302	0.819879102	1.005454143	0.062353469
iPSC-CVPC	Arteria	acceptor	C	-42	0.899938381	0.813426383	0.996017327	0.039761144
iPSC-CVPC	Arteria	acceptor	C	-43	0.90146531	0.815218645	0.997209662	0.043313051
iPSC-CVPC	Arteria	acceptor	C	-44	0.842691179	0.761792293	0.932482797	0.00080427
iPSC-CVPC	Arteria	acceptor	C	-45	0.883950309	0.799471717	0.977678778	0.015141092
iPSC-CVPC	Arteria	acceptor	C	-46	0.895344238	0.810239644	0.989721623	0.028882726
iPSC-CVPC	Arteria	acceptor	C	-47	0.906737187	0.818624521	1.004716191	0.057840868
iPSC-CVPC	Arteria	acceptor	C	-48	0.930677975	0.841647658	1.02954632	0.160387934
iPSC-CVPC	Arteria	acceptor	C	-49	0.887798924	0.803061621	0.981781725	0.018863866
iPSC-CVPC	Arteria	acceptor	C	-50	0.849283853	0.768456571	0.938928831	0.001292203
iPSC-CVPC	Arteria	acceptor	C	-51	0.922265675	0.832717742	1.021825792	0.119685078
iPSC-CVPC	Arteria	acceptor	C	-52	0.926734251	0.839166644	1.023832969	0.130570587
iPSC-CVPC	Arteria	acceptor	C	-53	0.960064455	0.868725378	1.061362036	0.418263018
iPSC-CVPC	Arteria	acceptor	C	-54	0.846064302	0.766201575	0.934550608	0.000910035
iPSC-CVPC	Arteria	acceptor	C	-55	0.955376177	0.864567581	1.05605879	0.376084252
iPSC-CVPC	Arteria	acceptor	C	-56	0.877767106	0.794953688	0.969509083	0.009333017
iPSC-CVPC	Arteria	acceptor	C	-57	0.952063684	0.862596281	1.051150543	0.329657381
iPSC-CVPC	Arteria	acceptor	C	-58	0.88985692	0.806574255	0.982030136	0.018791901
iPSC-CVPC	Arteria	acceptor	C	-59	0.895524153	0.810943993	0.989263455	0.028107169
iPSC-CVPC	Arteria	acceptor	C	-60	0.891260314	0.805879551	0.986037281	0.024119224
iPSC-CVPC	Arteria	acceptor	C	-61	0.928308751	0.841587143	1.024336104	0.135302535
iPSC-CVPC	Arteria	acceptor	C	-62	0.942330337	0.853150945	1.041226861	0.236295787
iPSC-CVPC	Arteria	acceptor	C	-63	0.9632988	0.872727523	1.063586658	0.453557747
iPSC-CVPC	Arteria	acceptor	C	-64	0.922330964	0.836200248	1.017680529	0.105690242
iPSC-CVPC	Arteria	acceptor	C	-65	0.970010753	0.879941053	1.069726568	0.537651769
iPSC-CVPC	Arteria	acceptor	C	-66	0.9667384	0.875195375	1.068325596	0.51267328
iPSC-CVPC	Arteria	acceptor	C	-67	0.946037736	0.857208471	1.044418505	0.271703271
iPSC-CVPC	Arteria	acceptor	C	-68	0.920298144	0.834932895	1.0147286	0.092828498
iPSC-CVPC	Arteria	acceptor	C	-69	0.891482558	0.809411612	0.982153854	0.019601863
iPSC-CVPC	Arteria	acceptor	C	-70	0.953188786	0.864933722	1.050734458	0.337298935
iPSC-CVPC	Arteria	acceptor	C	-71	0.878261955	0.798008963	0.966873448	0.007813264
iPSC-CVPC	Arteria	acceptor	C	-72	0.892497902	0.810695445	0.982815744	0.020191797
iPSC-CVPC	Arteria	acceptor	C	-73	0.901771626	0.819227123	0.992947419	0.033724174
iPSC-CVPC	Arteria	acceptor	C	-74	0.908083167	0.823931394	1.001080581	0.050995242
iPSC-CVPC	Arteria	acceptor	C	-75	0.895658394	0.813370641	0.986533722	0.024202027
iPSC-CVPC	Arteria	acceptor	C	-76	0.88475355	0.804657596	0.973053402	0.011261865
iPSC-CVPC	Arteria	acceptor	C	-77	0.933159799	0.847630033	1.027642167	0.157300841
iPSC-CVPC	Arteria	acceptor	C	-78	0.90591781	0.824020266	0.996214429	0.040726047
iPSC-CVPC	Arteria	acceptor	C	-79	0.94119698	0.854866769	1.036587366	0.213661176
iPSC-CVPC	Arteria	acceptor	C	-80	0.94687821	0.861289437	1.041292173	0.259284495
iPSC-CVPC	Arteria	acceptor	C	-81	0.899763357	0.818560342	0.989305269	0.028688537
iPSC-CVPC	Arteria	acceptor	C	-82	0.897997134	0.817193257	0.987044418	0.024296458
iPSC-CVPC	Arteria	acceptor	C	-83	0.871866313	0.794270886	0.95724737	0.003801166
iPSC-CVPC	Arteria	acceptor	C	-84	0.945171775	0.861040098	1.037816919	0.237646469
iPSC-CVPC	Arteria	acceptor	C	-85	0.897103752	0.817481086	0.98472315	0.021971077
iPSC-CVPC	Arteria	acceptor	C	-86	0.940987947	0.857912714	1.032351927	0.19771888
iPSC-CVPC	Arteria	acceptor	C	-87	0.928263279	0.846000764	1.018795275	0.114808442
iPSC-CVPC	Arteria	acceptor	C	-88	0.863747697	0.786714959	0.948545277	0.001981784
iPSC-CVPC	Arteria	acceptor	C	-89	0.870120407	0.793030814	0.954900785	0.003164928
iPSC-CVPC	Arteria	acceptor	C	-90	0.921011002	0.840022624	1.010050322	0.079907708
iPSC-CVPC	Arteria	acceptor	C	-91	0.988578063	0.902630179	1.0830154	0.818207861
iPSC-CVPC	Arteria	acceptor	C	-92	0.974739161	0.890830887	1.06682768	0.584773798
iPSC-CVPC	Arteria	acceptor	C	-93	0.975150382	0.891268914	1.067200825	0.58510363
iPSC-CVPC	Arteria	acceptor	C	-94	0.97635073	0.89179348	1.069208838	0.614236121
iPSC-CVPC	Arteria	acceptor	C	-95	0.816197986	0.744267065	0.895220515	1.47E-05
iPSC-CVPC	Arteria	acceptor	C	-96	0.976191953	0.89752062	1.061854668	0.580994857
iPSC-CVPC	Arteria	acceptor	C	-97	0.895441297	0.815837437	0.983018175	0.019177038
iPSC-CVPC	Arteria	acceptor	C	-98	0.712079276	0.591494805	0.858112168	0.000317843
iPSC-CVPC	Arteria	acceptor	C	-99	0.935792896	0.823347847	1.064451174	0.314302782
iPSC-CVPC	Arteria	acceptor	G	0	0.955646863	0.866725158	1.054023846	0.360221367
iPSC-CVPC	Arteria	acceptor	G	-1	0.854553938	0.775482681	0.941973161	0.001399482
iPSC-CVPC	Arteria	acceptor	G	-2	0.90578056	0.82212605	0.998294839	0.043415895
iPSC-CVPC	Arteria	acceptor	G	-3	0.911186348	0.826419489	1.00496393	0.059424188
iPSC-CVPC	Arteria	acceptor	G	-4	0.926279094	0.840993288	1.020571991	0.116717161
iPSC-CVPC	Arteria	acceptor	G	-5	0.970702467	0.881223811	1.069685111	0.556995182
iPSC-CVPC	Arteria	acceptor	G	-6	0.871938269	0.791958752	0.960248609	0.005210242
iPSC-CVPC	Arteria	acceptor	G	-7	0.870747264	0.790525468	0.95937158	0.004638952
iPSC-CVPC	Arteria	acceptor	G	-8	0.909704481	0.82482949	1.003633317	0.058559682
iPSC-CVPC	Arteria	acceptor	G	-9	0.916553043	0.832998595	1.008759527	0.072488047
iPSC-CVPC	Arteria	acceptor	G	-10	0.855103118	0.776415011	0.942016819	0.00137244
iPSC-CVPC	Arteria	acceptor	G	-11	0.892903719	0.810804692	0.983568365	0.021109077
iPSC-CVPC	Arteria	acceptor	G	-12	0.805929845	0.731899378	0.887632631	1.02E-05
iPSC-CVPC	Arteria	acceptor	G	-13	0.882257463	0.80186706	0.9709603	0.009958153
iPSC-CVPC	Arteria	acceptor	G	-14	0.916513526	0.832000794	1.009929733	0.076903423
iPSC-CVPC	Arteria	acceptor	G	-15	0.891088418	0.80931446	0.981398972	0.018747903
iPSC-CVPC	Arteria	acceptor	G	-16	0.861267118	0.782250561	0.948499762	0.002174054
iPSC-CVPC	Arteria	acceptor	G	-17	0.913216999	0.829546483	1.005617478	0.063629786
iPSC-CVPC	Arteria	acceptor	G	-18	0.928046839	0.841715977	1.023592706	0.130668946
iPSC-CVPC	Arteria	acceptor	G	-19	0.921302718	0.836140859	1.015465897	0.094124477
iPSC-CVPC	Arteria	acceptor	G	-20	0.897001309	0.814596467	0.988031158	0.025784799
iPSC-CVPC	Arteria	acceptor	G	-21	0.905197807	0.821590759	0.997628919	0.043428655
iPSC-CVPC	Arteria	acceptor	G	-22	0.984171019	0.892294482	1.085894338	0.747487436
iPSC-CVPC	Arteria	acceptor	G	-23	0.841962586	0.764828588	0.927105597	0.000413532
iPSC-CVPC	Arteria	acceptor	G	-24	0.828205922	0.752221592	0.91207507	0.000113703
iPSC-CVPC	Arteria	acceptor	G	-25	0.9546613	0.866257388	1.052397359	0.349789002
iPSC-CVPC	Arteria	acceptor	G	-26	0.903599843	0.820573507	0.995297443	0.037394355
iPSC-CVPC	Arteria	acceptor	G	-27	0.924063721	0.839118223	1.017943025	0.106222857
iPSC-CVPC	Arteria	acceptor	G	-28	0.922888987	0.83784484	1.016883484	0.100215467
iPSC-CVPC	Arteria	acceptor	G	-29	0.894204762	0.810731702	0.986585434	0.024855663
iPSC-CVPC	Arteria	acceptor	G	-30	0.87199111	0.791430089	0.961018173	0.005268798
iPSC-CVPC	Arteria	acceptor	G	-31	0.911562608	0.828802446	1.002842228	0.056200361
iPSC-CVPC	Arteria	acceptor	G	-32	0.9237819	0.839429177	1.016955064	0.103448424
iPSC-CVPC	Arteria	acceptor	G	-33	0.861497547	0.782489788	0.948716896	0.002184948
iPSC-CVPC	Arteria	acceptor	G	-34	0.928493156	0.844360018	1.021350751	0.123018826
iPSC-CVPC	Arteria	acceptor	G	-35	0.873145426	0.79312101	0.961496679	0.005266893
iPSC-CVPC	Arteria	acceptor	G	-36	0.969170316	0.879190199	1.068807258	0.537516638
iPSC-CVPC	Arteria	acceptor	G	-37	0.970477394	0.879572303	1.071208196	0.550439842
iPSC-CVPC	Arteria	acceptor	G	-38	0.875178018	0.795616611	0.962936797	0.005681317
iPSC-CVPC	Arteria	acceptor	G	-39	0.922356848	0.838491856	1.014889199	0.095044024
iPSC-CVPC	Arteria	acceptor	G	-40	0.87336829	0.793353351	0.961705279	0.005686134
iPSC-CVPC	Arteria	acceptor	G	-41	0.858718652	0.779978035	0.945651322	0.001844771
iPSC-CVPC	Arteria	acceptor	G	-42	0.891067659	0.810113539	0.980372911	0.017602784
iPSC-CVPC	Arteria	acceptor	G	-43	0.913787364	0.829919413	1.006423044	0.066700177
iPSC-CVPC	Arteria	acceptor	G	-44	0.869136705	0.789138716	0.957506591	0.004316922
iPSC-CVPC	Arteria	acceptor	G	-45	0.925031233	0.84112073	1.017616381	0.105951656
iPSC-CVPC	Arteria	acceptor	G	-46	0.927027897	0.841926339	1.021090848	0.123654787
iPSC-CVPC	Arteria	acceptor	G	-47	0.94435407	0.857167295	1.040736823	0.248682021
iPSC-CVPC	Arteria	acceptor	G	-48	0.859977435	0.781451399	0.946620591	0.001938902
iPSC-CVPC	Arteria	acceptor	G	-49	0.878270619	0.798154624	0.966644506	0.007424108
iPSC-CVPC	Arteria	acceptor	G	-50	0.910746932	0.826685192	1.003667965	0.058155802
iPSC-CVPC	Arteria	acceptor	G	-51	0.87372019	0.793815573	0.96191728	0.005375467
iPSC-CVPC	Arteria	acceptor	G	-52	0.883495959	0.802266983	0.97321726	0.01146498
iPSC-CVPC	Arteria	acceptor	G	-53	0.867735357	0.786690943	0.95742048	0.004379387
iPSC-CVPC	Arteria	acceptor	G	-54	0.904186733	0.819650464	0.997742935	0.043343179
iPSC-CVPC	Arteria	acceptor	G	-55	0.922304587	0.837090003	1.016539024	0.099225174
iPSC-CVPC	Arteria	acceptor	G	-56	0.887664734	0.805051097	0.979049757	0.015916388
iPSC-CVPC	Arteria	acceptor	G	-57	0.916549566	0.83062416	1.01166618	0.080163259
iPSC-CVPC	Arteria	acceptor	G	-58	0.848911321	0.769350399	0.936998616	0.001090544
iPSC-CVPC	Arteria	acceptor	G	-59	0.930696525	0.844987323	1.025450042	0.141383033
iPSC-CVPC	Arteria	acceptor	G	-60	0.882495654	0.800905107	0.972672377	0.010984073
iPSC-CVPC	Arteria	acceptor	G	-61	0.844904698	0.766578524	0.931509064	0.000667277
iPSC-CVPC	Arteria	acceptor	G	-62	0.865486034	0.784425953	0.955196123	0.003937153
iPSC-CVPC	Arteria	acceptor	G	-63	0.92439471	0.837885199	1.020205856	0.11609353
iPSC-CVPC	Arteria	acceptor	G	-64	0.832816122	0.75389808	0.920249124	0.000302063
iPSC-CVPC	Arteria	acceptor	G	-65	0.868788562	0.785277115	0.961514817	0.00629188
iPSC-CVPC	Arteria	acceptor	G	-66	0.828708824	0.74985456	0.916105222	0.000209492
iPSC-CVPC	Arteria	acceptor	G	-67	0.91762289	0.829499982	1.015455956	0.095616095
iPSC-CVPC	Arteria	acceptor	G	-68	0.921172109	0.831845919	1.020515705	0.114090135
iPSC-CVPC	Arteria	acceptor	G	-69	0.917405612	0.826908835	1.01824441	0.101876943
iPSC-CVPC	Arteria	acceptor	G	-70	0.831044858	0.748264561	0.923269205	0.000534622
iPSC-CVPC	Arteria	acceptor	G	-71	0.891755235	0.801796368	0.992234427	0.034690339
iPSC-CVPC	Arteria	acceptor	G	-72	0.953280311	0.855496871	1.06274527	0.380509425
iPSC-CVPC	Arteria	acceptor	G	-73	0.890269961	0.799225562	0.992149669	0.034334218
iPSC-CVPC	Arteria	acceptor	G	-74	0.925362229	0.828516253	1.034083797	0.168956895
iPSC-CVPC	Arteria	acceptor	G	-75	0.861476416	0.773368297	0.960034613	0.006386178
iPSC-CVPC	Arteria	acceptor	G	-76	0.896572172	0.80432015	0.999861792	0.046623963
iPSC-CVPC	Arteria	acceptor	G	-77	0.868536808	0.778002881	0.970085901	0.011442953
iPSC-CVPC	Arteria	acceptor	G	-78	0.90452587	0.811152309	1.009095662	0.071663765
iPSC-CVPC	Arteria	acceptor	G	-79	0.861796732	0.771586928	0.963003263	0.007948239
iPSC-CVPC	Arteria	acceptor	G	-80	0.903850245	0.809291773	1.009974282	0.071911808
iPSC-CVPC	Arteria	acceptor	G	-81	0.862358629	0.771543845	0.964323545	0.008927606
iPSC-CVPC	Arteria	acceptor	G	-82	0.946764344	0.844754478	1.06169096	0.340576261
iPSC-CVPC	Arteria	acceptor	G	-83	1.001094118	0.894170293	1.12150892	1
iPSC-CVPC	Arteria	acceptor	G	-84	0.930918221	0.828782015	1.046294082	0.226572392
iPSC-CVPC	Arteria	acceptor	G	-85	0.901465701	0.800600088	1.0156909	0.085174256
iPSC-CVPC	Arteria	acceptor	G	-86	0.955890357	0.847983805	1.078286746	0.466831501
iPSC-CVPC	Arteria	acceptor	G	-87	0.910437022	0.807749208	1.026854323	0.120759665
iPSC-CVPC	Arteria	acceptor	G	-88	0.950626792	0.837732684	1.079623516	0.423681723
iPSC-CVPC	Arteria	acceptor	G	-89	0.934980924	0.82581937	1.059350756	0.284551028
iPSC-CVPC	Arteria	acceptor	G	-90	0.799640503	0.709944126	0.901102999	0.000216505
iPSC-CVPC	Arteria	acceptor	G	-91	0.842465389	0.746194176	0.951705594	0.005200704
iPSC-CVPC	Arteria	acceptor	G	-92	0.815874225	0.719603597	0.925544919	0.001425306
iPSC-CVPC	Arteria	acceptor	G	-93	0.822356766	0.72234048	0.936826573	0.003075803
iPSC-CVPC	Arteria	acceptor	G	-94	0.812052428	0.707202289	0.933160039	0.002878936
iPSC-CVPC	Arteria	acceptor	G	-95	0.970747636	0.867190114	1.087371896	0.607631975
iPSC-CVPC	Arteria	acceptor	G	-96	0.899511952	0.792543529	1.021695358	0.100282048
iPSC-CVPC	Arteria	acceptor	G	-97	0.578212752	0.475726025	0.70307062	2.78E-08
iPSC-CVPC	Arteria	acceptor	G	-98	1.167380157	1.073849476	1.269085927	0.000244696
iPSC-CVPC	Arteria	acceptor	G	-99	1.162509333	1.065931372	1.267704548	0.000602459
iPSC-CVPC	Arteria	acceptor	T	0	1.092918861	0.995980418	1.199732209	0.058886659
iPSC-CVPC	Arteria	acceptor	T	-1	1.157233199	1.054467427	1.270429288	0.001835913
iPSC-CVPC	Arteria	acceptor	T	-2	1.110248814	1.011422031	1.219169057	0.026400467
iPSC-CVPC	Arteria	acceptor	T	-3	1.123179942	1.023366434	1.233134979	0.013470598
iPSC-CVPC	Arteria	acceptor	T	-4	1.166420391	1.062602727	1.280823574	0.00110866
iPSC-CVPC	Arteria	acceptor	T	-5	1.126259253	1.026456194	1.236148466	0.011279011
iPSC-CVPC	Arteria	acceptor	T	-6	1.074202844	0.979045716	1.178876434	0.129883505
iPSC-CVPC	Arteria	acceptor	T	-7	1.105969199	1.008147994	1.213715043	0.032533769
iPSC-CVPC	Arteria	acceptor	T	-8	1.074055057	0.979580732	1.17790197	0.126798758
iPSC-CVPC	Arteria	acceptor	T	-9	1.107805834	1.008896762	1.216828807	0.030931546
iPSC-CVPC	Arteria	acceptor	T	-10	1.040996193	0.948808876	1.142466955	0.400514216
iPSC-CVPC	Arteria	acceptor	T	-11	1.088323444	0.992091512	1.194186096	0.073461085
iPSC-CVPC	Arteria	acceptor	T	-12	1.24785934	1.136830606	1.370253866	2.28E-06
iPSC-CVPC	Arteria	acceptor	T	-13	1.140082944	1.038795203	1.251686941	0.005204652
iPSC-CVPC	Arteria	acceptor	T	-14	1.098890568	1.002335052	1.205128527	0.042247528
iPSC-CVPC	Arteria	acceptor	T	-15	1.115159211	1.016554013	1.223726905	0.020286897
iPSC-CVPC	Arteria	acceptor	T	-16	1.120425705	1.02076758	1.230290965	0.016191343
iPSC-CVPC	Arteria	acceptor	T	-17	1.129012212	1.028675216	1.239607581	0.010331428
iPSC-CVPC	Arteria	acceptor	T	-18	1.050766003	0.957603154	1.153318221	0.293135935
iPSC-CVPC	Arteria	acceptor	T	-19	1.091458256	0.994999922	1.197712459	0.062965539
iPSC-CVPC	Arteria	acceptor	T	-20	1.095417368	0.997959403	1.202825689	0.055110424
iPSC-CVPC	Arteria	acceptor	T	-21	1.166267834	1.063003455	1.279992506	0.001001066
iPSC-CVPC	Arteria	acceptor	T	-22	1.092538773	0.99606481	1.198783732	0.060005244
iPSC-CVPC	Arteria	acceptor	T	-23	1.212977643	1.103962727	1.333287478	4.94E-05
iPSC-CVPC	Arteria	acceptor	T	-24	1.21496014	1.106404068	1.334681775	3.69E-05
iPSC-CVPC	Arteria	acceptor	T	-25	1.11672155	1.018307772	1.225070549	0.018279423
iPSC-CVPC	Arteria	acceptor	T	-26	1.069829213	0.974971015	1.174223815	0.154592554
iPSC-CVPC	Arteria	acceptor	T	-27	1.105136008	1.007383837	1.212806393	0.032554758
iPSC-CVPC	Arteria	acceptor	T	-28	1.081327436	0.984715146	1.187724493	0.099989758
iPSC-CVPC	Arteria	acceptor	T	-29	1.095919087	0.999176398	1.20243132	0.05129543
iPSC-CVPC	Arteria	acceptor	T	-30	1.148474271	1.045820807	1.261651509	0.003420464
iPSC-CVPC	Arteria	acceptor	T	-31	1.225864883	1.115863993	1.347215201	1.68E-05
iPSC-CVPC	Arteria	acceptor	T	-32	1.068718093	0.97477806	1.171998364	0.158242581
iPSC-CVPC	Arteria	acceptor	T	-33	1.101681761	1.004756877	1.208416491	0.037502136
iPSC-CVPC	Arteria	acceptor	T	-34	1.162221413	1.058882412	1.276098591	0.001427226
iPSC-CVPC	Arteria	acceptor	T	-35	1.203456436	1.096389688	1.321453566	7.86E-05
iPSC-CVPC	Arteria	acceptor	T	-36	1.149336678	1.048136561	1.260718437	0.00292034
iPSC-CVPC	Arteria	acceptor	T	-37	1.05356295	0.961605653	1.154518194	0.260264189
iPSC-CVPC	Arteria	acceptor	T	-38	1.131986153	1.032004971	1.242092671	0.008273672
iPSC-CVPC	Arteria	acceptor	T	-39	1.073919225	0.979643686	1.17752534	0.127545461
iPSC-CVPC	Arteria	acceptor	T	-40	1.125237043	1.025816388	1.234711058	0.011523747
iPSC-CVPC	Arteria	acceptor	T	-41	1.120916697	1.023088306	1.228441214	0.013412043
iPSC-CVPC	Arteria	acceptor	T	-42	1.129517508	1.029770707	1.23928806	0.009476998
iPSC-CVPC	Arteria	acceptor	T	-43	1.165096047	1.061709153	1.278999931	0.001147098
iPSC-CVPC	Arteria	acceptor	T	-44	1.175715536	1.072210425	1.289565472	0.000508825
iPSC-CVPC	Arteria	acceptor	T	-45	1.132049946	1.032092929	1.242125717	0.008292778
iPSC-CVPC	Arteria	acceptor	T	-46	1.113955885	1.015316053	1.222597906	0.021370679
iPSC-CVPC	Arteria	acceptor	T	-47	1.054676806	0.963123933	1.155197654	0.252965209
iPSC-CVPC	Arteria	acceptor	T	-48	1.152810359	1.051815965	1.26389841	0.002108033
iPSC-CVPC	Arteria	acceptor	T	-49	1.169926888	1.065844975	1.284643724	0.000869046
iPSC-CVPC	Arteria	acceptor	T	-50	1.188643329	1.083203605	1.304775901	0.00022759
iPSC-CVPC	Arteria	acceptor	T	-51	1.135518454	1.036076574	1.244906033	0.00628729
iPSC-CVPC	Arteria	acceptor	T	-52	1.129464709	1.030070104	1.23880534	0.009101765
iPSC-CVPC	Arteria	acceptor	T	-53	1.171582614	1.068603097	1.284920046	0.000662611
iPSC-CVPC	Arteria	acceptor	T	-54	1.198210666	1.092807331	1.314195282	0.000103057
iPSC-CVPC	Arteria	acceptor	T	-55	1.109533638	1.011480447	1.217485608	0.027483921
iPSC-CVPC	Arteria	acceptor	T	-56	1.132565358	1.033169239	1.241946781	0.007592154
iPSC-CVPC	Arteria	acceptor	T	-57	1.036290852	0.945420324	1.136209631	0.445451638
iPSC-CVPC	Arteria	acceptor	T	-58	1.178788226	1.075390772	1.292474616	0.000378886
iPSC-CVPC	Arteria	acceptor	T	-59	1.198183639	1.091655386	1.315535471	0.000116405
iPSC-CVPC	Arteria	acceptor	T	-60	1.149996114	1.049892216	1.260026344	0.002420772
iPSC-CVPC	Arteria	acceptor	T	-61	1.097983185	1.000937148	1.204866641	0.045762497
iPSC-CVPC	Arteria	acceptor	T	-62	1.156722755	1.055687789	1.267807394	0.001597495
iPSC-CVPC	Arteria	acceptor	T	-63	1.11676621	1.018678495	1.224701522	0.017569811
iPSC-CVPC	Arteria	acceptor	T	-64	1.18222414	1.078580228	1.296217374	0.000292825
iPSC-CVPC	Arteria	acceptor	T	-65	1.110691979	1.01329802	1.217853438	0.024038195
iPSC-CVPC	Arteria	acceptor	T	-66	1.213602453	1.108439345	1.329135472	2.33E-05
iPSC-CVPC	Arteria	acceptor	T	-67	1.13330311	1.03481927	1.241473951	0.006694966
iPSC-CVPC	Arteria	acceptor	T	-68	1.104429858	1.009147771	1.209104388	0.029626705
iPSC-CVPC	Arteria	acceptor	T	-69	1.212413054	1.107036512	1.328200841	2.70E-05
iPSC-CVPC	Arteria	acceptor	T	-70	1.158499216	1.058871673	1.267837935	0.001183865
iPSC-CVPC	Arteria	acceptor	T	-71	1.185879228	1.083697034	1.298028571	0.000183621
iPSC-CVPC	Arteria	acceptor	T	-72	1.086642807	0.99367	1.188673062	0.068444091
iPSC-CVPC	Arteria	acceptor	T	-73	1.149479917	1.051145246	1.257349975	0.002132899
iPSC-CVPC	Arteria	acceptor	T	-74	1.125712797	1.030409389	1.230089884	0.00822436
iPSC-CVPC	Arteria	acceptor	T	-75	1.153158901	1.055206285	1.260521973	0.001462511
iPSC-CVPC	Arteria	acceptor	T	-76	1.138255849	1.041541453	1.244301238	0.004056515
iPSC-CVPC	Arteria	acceptor	T	-77	1.226760266	1.123054926	1.340432495	4.39E-06
iPSC-CVPC	Arteria	acceptor	T	-78	1.171787916	1.073177043	1.279744331	0.000357011
iPSC-CVPC	Arteria	acceptor	T	-79	1.146248171	1.051112966	1.250245089	0.001858085
iPSC-CVPC	Arteria	acceptor	T	-80	1.142564205	1.048259903	1.245540998	0.002269543
iPSC-CVPC	Arteria	acceptor	T	-81	1.126944801	1.034597448	1.227709705	0.005905086
iPSC-CVPC	Arteria	acceptor	T	-82	1.127530736	1.03569307	1.227664455	0.005439022
iPSC-CVPC	Arteria	acceptor	T	-83	1.176518461	1.080482256	1.281261888	0.00016559
iPSC-CVPC	Arteria	acceptor	T	-84	1.169812286	1.07508063	1.273102496	0.000236834
iPSC-CVPC	Arteria	acceptor	T	-85	1.174678225	1.079938016	1.277913611	0.000151061
iPSC-CVPC	Arteria	acceptor	T	-86	1.099059503	1.010535782	1.195399153	0.026254202
iPSC-CVPC	Arteria	acceptor	T	-87	1.188699744	1.093089448	1.292736514	4.58E-05
iPSC-CVPC	Arteria	acceptor	T	-88	1.2139255	1.116609113	1.319794582	4.34E-06
iPSC-CVPC	Arteria	acceptor	T	-89	1.233355613	1.134372868	1.341147646	7.25E-07
iPSC-CVPC	Arteria	acceptor	T	-90	1.273148945	1.170568229	1.38488215	1.32E-08
iPSC-CVPC	Arteria	acceptor	T	-91	1.149606455	1.056770741	1.250750434	0.001092207
iPSC-CVPC	Arteria	acceptor	T	-92	1.186671855	1.0903927	1.29154014	6.36E-05
iPSC-CVPC	Arteria	acceptor	T	-93	1.178290535	1.08337566	1.281625618	0.000109079
iPSC-CVPC	Arteria	acceptor	T	-94	1.175716912	1.081425615	1.278264712	0.000125112
iPSC-CVPC	Arteria	acceptor	T	-95	1.219947395	1.118438958	1.330939072	6.04E-06
iPSC-CVPC	Arteria	acceptor	T	-96	1.156856484	1.053866619	1.270333236	0.001934089
iPSC-CVPC	Arteria	acceptor	T	-97	1.106870474	0.985144239	1.244605184	0.086465281
iPSC-CVPC	Arteria	acceptor	T	-98	0.331751601	0.262214257	0.418442608	4.30E-22
[truncated: 401 more rows]
